# Supplementary material for: Sublinear scaling of the cellular proteome with ploidy
Source: Nat Commun. 2022 Oct 19;13:6182. doi: 10.1038/s41467-022-33904-7 (PMC9581932; doi:10.1038/s41467-022-33904-7)
Supplement: Supplementary file 4 — Supplementary Dataset 2 [file 41467_2022_33904_MOESM4_ESM.xlsx]

## Sheet: Read me
Caption	Description
1N MED	median value of mRNA abundance in haploid cells
1N CON	confidence interval of mRNA abundance in haploid cells
2N MED	median value of mRNA abundance in diploid cells
2N CON	confidence interval of mRNA abundance in diploid cells
2N/1N	real fold change of mRNA abundance diploid to haploid (using S. pombe probes for normalization)
2N/1N norm	normalized fold change of mRNA abundance diploid to haploid (standard)
2N/1N P	p value calculated for the triplicate mRNA abundance measurements
2N/1N Padj	adjusted p value (Benjamini Hochberg)
2N/1N signif	Statement based on corrected p-values whether there is a significant difference (p< 0.05)
3N MED	median value of mRNA abundance in triploid cells
3N CON	confidence interval of mRNA abundance in triploid cells
3N/1N	real fold change of mRNA abundance triploid to haploid (using S. pombe probes for normalization)
3N/1N norm	normalized fold change of mRNA abundance triploid to haploid (standard)
3N/1N P	p value calculated for the triplicate mRNA abundance measurements
3N/1N Padj	adjusted p value (Benjamini Hochberg)
3N/1N signif	Statement based on corrected p-values whether there is a significant difference (p< 0.05)
4N MED	median value of mRNA abundance in tetraploid cells
4N CON	confidence interval of mRNA abundance in tetraploid cells
4N/1N	real fold change of mRNA abundance tetraploid to haploid (using S. pombe probes for normalization)
4N/1N norm	normalized fold change of mRNA abundance tetraploid to haploid (standard)
4N/1N P	p value calculated for the triplicate mRNA abundance measurements
4N/1N Padj	adjusted p value (Benjamini Hochberg)
4N/1N signif	Statement based on corrected p-values whether there is a significant difference (p< 0.05)
reliability (high, low)	We defined low and high expression cut-offs for each probe and gene based on distributions. If all probes for a gene were below or above the threshold, the gene was labelled as "not reliable". This means that the measurements should be treated with care but are not per se to be discarded.
Normalized
Caption	Description
1N_RNA	normalized log2 ratio to s.pombe spike
2N_RNA	normalized log2 ratio to s.pombe spike
3N_RNA	normalized log2 ratio to s.pombe spike
4N_RNA	normalized log2 ratio to s.pombe spike
Gene names	Name(s) of the gene(s) associated to the protein(s) contained within the group.
ORF	Ensembl Gene ID (http://www.ensembl.org/index.html)

## Sheet: Total_mRNA
ORF	Gene names	1N MED	1N CON	2N MED	2N CON	2N/1N	2N/1N norm	2N/1N P	2N/1N Padj	2N/1N signif	3N MED	3N CON	3N/1N	3N/1N norm	3N/1N P	3N/1N Padj	3N/1N signif	4N MED	4N CON	4N/1N	4N/1N norm	4N/1N P	4N/1N Padj	4N/1N signif	Reliable
YKL106C-A	YKL106C-A	11.8654	10.4 - 13.8	9.31872	9.31 - 9.32	0.789541	0.676882	0.000750009	0.00892737	not	12.6245	10.5 - 15.9	1.06978	0.650441	0.000286538	0.0060363	repressed	17.7401	15.5 - 20.4	1.5036	0.808321	0.00551426	0.0561962	not	not
YCL001W-B	YCL001W-B	12.1476	10.3 - 14	9.45067	9.1 - 9.82	0.777346	0.666427	0.0020617	0.0125932	repressed	12.4887	11.4 - 13.2	1.02138	0.621016	0.00346926	0.0156293	repressed	17.4314	15.8 - 18.7	1.43467	0.771267	0.00734444	0.0623021	not	not
YOL166W-A	YOL166W-A	12.3101	11.7 - 12.8	11.2364	9.78 - 12.7	0.912635	0.782412	0.00390524	0.0172365	not	12.8367	12.4 - 13.5	1.03634	0.630114	0.00302103	0.0145288	repressed	16.3734	16.2 - 16.8	1.3283	0.714083	0.00223074	0.040832	not	not
YMR247W-A	YMR247W-A	12.4809	12.4 - 12.6	9.99682	8.81 - 11.3	0.801457	0.687098	0.000391379	0.00716439	not	12.0724	11.2 - 12.6	0.963551	0.585855	0.000809395	0.00793403	repressed	16.9971	16.4 - 17.7	1.36017	0.731213	0.00294559	0.0461503	not	not
YPL121C	MEI5	12.6356	12.3 - 12.9	9.7896	8.51 - 11.4	0.775643	0.664967	0.000172426	0.00626999	repressed	12.1474	10.1 - 16	0.96262	0.585289	6.10221e-05	0.0060363	repressed	17.6967	17.5 - 18.2	1.40165	0.753511	0.00182654	0.0376827	not	not
YEL075C	YEL075C	12.6532	11.3 - 13.8	10.4356	9.65 - 11.3	0.827051	0.70904	0.00285305	0.0149277	not	13.0165	2012-12-14	1.02485	0.623124	0.00312692	0.0147999	repressed	17.6726	13.7 - 22.2	1.39115	0.747866	0.0200021	0.0925037	not	not
YNL042W-B	YNL042W-B	12.7972	12.8 - 12.8	10.868	7.76 - 15.4	0.841745	0.721637	0.0306546	0.0657999	not	14.2736	12.4 - 16.7	1.1152	0.678058	0.00102314	0.00861145	not	18.255	17.7 - 19.2	1.42778	0.767562	0.00233725	0.0414288	not	not
YOR394W	PAU21	13.1495	12 - 14.5	11.7835	9.35 - 15	0.894464	0.766834	0.00448788	0.0186506	not	16.8055	16.7 - 16.7	1.27277	0.773863	0.0239084	0.0548584	not	19.4486	15.3 - 23.5	1.46842	0.789406	0.043884	0.140469	not	not
YER175W-A	YER175W-A	13.1495	12.1 - 14.3	10.5728	10 - 11.1	0.804225	0.689471	0.00095515	0.00966535	not	13.4908	10.4 - 16.5	1.00952	0.613807	0.0100509	0.0302384	repressed	17.4314	16.2 - 18.3	1.32575	0.712711	0.00109274	0.0322848	not	not
YOR351C	MEK1	13.246	13.1 - 13.4	12.4941	11.3 - 14	0.944612	0.809826	0.00404715	0.017596	not	14.9479	14.7 - 15.3	1.12519	0.684135	0.00370557	0.0162597	not	21.5066	16.4 - 27.6	1.62367	0.872867	0.0559393	0.160769	not	not
YFR023W	PES4	13.2568	12.8 - 13.5	11.107	9.22 - 13	0.839046	0.719323	0.000480159	0.00735071	not	17.3346	15.5 - 19.3	1.30935	0.796108	0.00905072	0.028392	not	20.6229	20.1 - 21	1.55821	0.837681	0.0157377	0.0843379	not	not
YHR079C-A	SAE3	13.3288	12.5 - 14.3	10.7415	7.33 - 15.6	0.796588	0.682923	0.0228829	0.0534376	not	13.8816	10.9 - 17.2	1.04177	0.633416	0.000273372	0.0060363	repressed	18.3173	16.2 - 21	1.37523	0.739308	0.00114935	0.0323362	not	not
YKL096C-B	YKL096C-B	13.3577	12 - 14.6	10.5795	9.32 - 11.8	0.795291	0.681812	0.000232251	0.00643929	not	14.5428	13.8 - 15.1	1.08473	0.659532	0.00545311	0.0206544	repressed	18.8167	17.8 - 19.8	1.41219	0.759177	0.00398491	0.0512948	not	not
YMR175W-A	YMR175W-A	13.3577	11.9 - 14.7	9.71487	9.34 - 10.1	0.729797	0.625663	0.000383835	0.00716439	repressed	12.1417	12.1 - 12.1	0.909262	0.552846	0.000338227	0.00622666	repressed	18.255	17.7 - 18.9	1.37183	0.737485	0.00111878	0.0322848	not	not
YNL318C	HXT14	13.5028	10.6 - 17.8	11.9051	9.58 - 14.7	0.880738	0.755066	0.0176743	0.044353	not	14.8581	14.4 - 15.2	1.09344	0.664833	0.013014	0.0363134	repressed	18.5216	15.4 - 21.7	1.36451	0.733545	0.0278034	0.108303	not	not
YGL235W	YGL235W	13.5155	13.1 - 13.9	13.9657	13.9 - 14	1.0346	0.886971	0.0600676	0.108972	not	16.3051	16.2 - 16.2	1.20254	0.731162	0.00878307	0.0277681	not	21.5688	19.6 - 23.1	1.5978	0.858963	0.0204241	0.0937861	not	not
YNL067W-B	YNL067W-B	13.5194	13.3 - 13.8	10.5111	9.1 - 11.9	0.778262	0.667212	0.000182805	0.00626999	not	13.8599	13.4 - 14.2	1.01744	0.61862	0.00345532	0.0156293	repressed	19.1824	17.9 - 20.4	1.42025	0.763514	0.00196485	0.0389936	not	not
YFR057W	YFR057W	13.6128	13.5 - 13.8	11.1479	7.79 - 16.1	0.810731	0.695049	0.0242786	0.0558072	not	14.6151	12.7 - 16.9	1.07348	0.652694	0.00070505	0.00771295	repressed	19.6227	16.6 - 23.1	1.4438	0.776173	0.00187214	0.0376827	not	not
YBR186W	PCH2	13.7709	12.2 - 15.4	11.5689	10.9 - 12.1	0.843599	0.723226	0.00149396	0.0109521	not	15.4269	15 - 15.6	1.11824	0.679911	0.00541388	0.0205786	not	19.9508	17 - 23.1	1.44712	0.777958	0.0210019	0.0946182	not	not
YGL262W	YGL262W	13.8395	13.6 - 14.1	10.7467	9.35 - 12	0.777704	0.666734	0.000147977	0.00626999	not	14.9423	13.6 - 16	1.07224	0.651937	0.00570828	0.0211296	repressed	18.6738	14.6 - 23.7	1.35106	0.726315	0.000894609	0.0305548	not	not
YBR182C-A	YBR182C-A	13.898	13.4 - 14.2	11.924	10.7 - 13.2	0.8583	0.73583	0.003302	0.0158835	not	15.355	11.4 - 20	1.10617	0.672568	0.000297482	0.0060363	not	17.992	17.2 - 18.7	1.296	0.696718	0.000393548	0.0226117	not	not
YCR104W	PAU3	13.9126	13 - 14.6	16.3635	9.83 - 26.1	1.15774	0.992547	0.947908	0.961681	not	25.1613	NA	1.81298	1.10233	0.120227	0.188628	not	33.3745	27.3 - 40	2.39861	1.28947	0.00942064	0.0683207	not	not
YLL006W-A	YLL006W-A	13.9166	13.2 - 14.6	10.4422	9.65 - 11.8	0.751454	0.644229	0.000814985	0.00907192	repressed	14.2042	13.9 - 14.4	1.01791	0.618909	0.00161538	0.0105739	repressed	16.3097	14.9 - 18.2	1.17547	0.631923	7.65049e-05	0.0112027	repressed	not
YGL138C	YGL138C	14.0944	13.2 - 14.9	10.8938	10.2 - 11.8	0.772739	0.662477	0.000979985	0.00978889	repressed	15.4081	14 - 16.6	1.0853	0.659879	0.00600164	0.0218017	repressed	20.7676	18.8 - 22.9	1.4692	0.789825	0.0181914	0.0883941	not	not
YIL160C	POT1	14.0975	13.8 - 14.4	11.0308	9.21 - 13.4	0.780064	0.668757	0.00427884	0.0181438	not	15.3863	15 - 15.6	1.08757	0.661261	0.0027139	0.0136608	repressed	19.4036	16.7 - 22.4	1.37806	0.74083	0.000901676	0.0305548	not	not
YOR008C-A	YOR008C-A	14.1237	13 - 15.2	11.7364	11.4 - 12.2	0.834473	0.715403	0.000551459	0.00776823	not	14.1369	13.6 - 14.7	0.997159	0.60629	0.00234047	0.0124766	repressed	18.9231	16.7 - 22	1.34545	0.723298	0.000539694	0.0258687	not	not
YHR185C	PFS1	14.1331	11.4 - 17.7	12.2013	9.09 - 16.5	0.859406	0.736778	0.0124144	0.0349507	not	16.0824	15.5 - 16.6	1.13131	0.687857	0.0125472	0.0354658	not	19.1211	15.8 - 22.4	1.34548	0.723318	0.0173899	0.0865061	not	not
YJR005C-A	YJR005C-A	14.1331	11.5 - 17.3	12.5025	10.8 - 14.5	0.884234	0.758063	0.0102918	0.0309301	not	15.7987	12.9 - 18.7	1.11738	0.679387	0.00332052	0.0153354	not	20.0979	20.1 - 20.1	1.42036	0.763574	0.016134	0.0843379	not	not
YOL131W	YOL131W	14.1437	12.4 - 16	10.6372	8.65 - 13.5	0.752589	0.645203	0.00361328	0.016683	repressed	14.6413	13.9 - 15.3	1.03364	0.628472	0.00294761	0.0142982	repressed	17.7613	15.6 - 20.3	1.26283	0.678882	0.000285934	0.0207339	not	not
YGL259W	YPS5	14.2243	11.1 - 17.8	12.3365	8.71 - 17	0.869455	0.745393	0.0451375	0.0880336	not	15.2693	14 - 16.8	1.08239	0.65811	0.00261677	0.0133699	repressed	20.1719	18.3 - 22.1	1.42826	0.767816	0.019894	0.0921542	not	not
YAL037C-A	YAL037C-A	14.2971	13.9 - 14.5	11.386	11.1 - 11.5	0.797331	0.68356	0.000334517	0.00685086	not	16.3931	10.2 - 24.6	1.1462	0.696912	0.00086825	0.00810367	not	19.2844	15.7 - 23.4	1.35005	0.725775	0.000791671	0.0288883	not	not
YLR013W	GAT3	14.2997	12.7 - 16.2	12.691	11.7 - 13.5	0.886919	0.760365	0.00853748	0.0275145	not	16.2953	12.6 - 20.5	1.13978	0.693005	0.000899277	0.00821073	not	22.6429	21.5 - 23.8	1.58106	0.849961	0.0509629	0.153241	not	not
YCL069W	VBA3	14.2997	12.8 - 15.7	10.6581	9.83 - 11.3	0.745485	0.639112	0.000359331	0.0070741	repressed	17.5331	15.5 - 19.5	1.21581	0.739236	0.0275885	0.0610343	not	20.7498	20.6 - 20.9	1.44921	0.779079	0.00930469	0.0682446	not	not
YHL012W	YHL012W	14.393	11.3 - 17.6	12.3249	10.3 - 14.2	0.861788	0.73882	0.0124935	0.035073	not	18.4385	13.5 - 25.4	1.26671	0.770181	0.115415	0.1827	not	26.1157	18.9 - 35.4	1.8247	0.980939	0.806055	0.880805	not	not
YHR212W-A	YHR212W-A	14.413	14 - 14.9	11.2803	9.04 - 13.8	0.782262	0.670642	0.000308608	0.00676545	not	14.357	13.7 - 15	0.98904	0.601353	0.00232469	0.0124276	repressed	23.0185	18.3 - 29	1.58614	0.852693	0.128658	0.267274	not	not
YIR021W-A	YIR021W-A	14.5023	13.5 - 15.7	13.5272	2012-12-15	0.933059	0.799922	0.00513946	0.020257	not	16.0824	15.6 - 16.5	1.10289	0.670573	0.00498434	0.0194692	not	22.2689	22 - 22.4	1.53502	0.825212	0.0168655	0.0853818	not	not
YDR218C	SPR28	14.5082	14.1 - 14.6	12.8865	12.7 - 13	0.889681	0.762733	0.00325095	0.0157166	not	14.5037	13.9 - 15	0.996896	0.60613	0.00101346	0.00858222	repressed	20.0979	20.1 - 20.1	1.38604	0.745123	0.00228622	0.0412752	not	not
YAL067W-A	YAL067W-A	14.5083	12.9 - 16.4	13.2958	12.5 - 14	0.916592	0.785805	0.00626205	0.0227623	not	16.9681	10.5 - 26.5	1.16677	0.709416	0.00283383	0.013974	not	18.5189	17.6 - 19.1	1.27428	0.685039	0.00161306	0.0360325	not	not
YPL130W	SPO19	14.529	13.7 - 15.3	13.4219	9.7 - 19.2	0.919712	0.788479	0.0597423	0.108476	not	16.4615	15.5 - 17.3	1.12866	0.686243	0.00659211	0.023144	not	24.1702	23.9 - 24.6	1.66809	0.896749	0.0645386	0.174897	not	not
YPL187W	MF(ALPHA)1	14.608	13.6 - 15.9	12.0603	9.94 - 14.2	0.823256	0.705786	0.00700265	0.0244186	not	15.1777	12.3 - 18.2	1.03881	0.631615	0.000366098	0.00624932	repressed	19.3038	16.4 - 22.7	1.31544	0.707169	0.00564727	0.0566306	not	not
YPL200W	CSM4	14.632	11.4 - 18.2	14.0034	11.7 - 17.1	0.966137	0.82828	0.0297846	0.0646685	not	15.2125	13.8 - 16.8	1.04093	0.632905	0.00725034	0.0245708	repressed	19.5591	16.7 - 23	1.3515	0.726555	0.00278878	0.0448106	not	not
YER085C	YER085C	14.6464	13.2 - 16.1	15.3219	10.7 - 22.6	1.04466	0.8956	0.29853	0.384972	not	20.5338	19.8 - 21	1.40548	0.854556	0.0623515	0.112563	not	25.1946	21.1 - 30.6	1.72232	0.9259	0.315931	0.474441	not	not
YDR522C	SPS2	14.7134	14.3 - 15.1	13.3593	10.6 - 16.7	0.906738	0.777357	0.00390685	0.0172365	not	17.619	16.5 - 18.9	1.19182	0.724646	0.0111263	0.032539	not	22.2416	20.1 - 24.6	1.50881	0.81112	0.0222841	0.0978561	not	not
YOR387C	YOR387C	14.7134	14.3 - 15.3	12.9978	9.49 - 18	0.877966	0.75269	0.0338188	0.0708441	not	18.4933	16.4 - 20.6	1.2488	0.759291	0.0284953	0.0624931	not	22.2416	20.1 - 25.2	1.50881	0.81112	0.0222841	0.0978561	not	not
YPL033C	SRL4	14.7225	14.4 - 15.3	11.5691	11.2 - 12	0.786698	0.674445	0.000281065	0.00660363	not	15.9232	14.6 - 17.4	1.07401	0.653017	0.00525656	0.0202528	repressed	19.3198	18.5 - 20.3	1.31305	0.705885	0.000674013	0.0277848	not	not
YLL046C	RNP1	14.7277	12.8 - 17.4	12.0471	10.7 - 13.7	0.817621	0.700956	0.00145805	0.0109521	not	17.6175	16.8 - 18.2	1.18953	0.723254	0.0150673	0.0398179	not	23.2017	22.6 - 24.2	1.57381	0.846063	0.0496061	0.15113	not	not
YBR296C-A	YBR296C-A	14.7437	11.9 - 18.8	11.6701	10.3 - 13.4	0.790866	0.678018	0.00161651	0.0112253	not	15.9547	11.8 - 21.1	1.06243	0.645977	0.0224757	0.0526388	not	22.2915	18.9 - 26.3	1.51171	0.812679	0.0247822	0.102737	not	not
YMR315W-A	YMR315W-A	14.761	13 - 16.5	11.2444	9.7 - 13	0.764099	0.655071	0.00192586	0.0120944	repressed	16.0689	12.2 - 21.5	1.09464	0.665562	0.000266112	0.0060363	repressed	18.5297	18.5 - 18.6	1.26105	0.677928	0.000577688	0.02635	not	not
YHR177W	YHR177W	14.7877	14.1 - 15.4	12.8746	11.7 - 14.2	0.873108	0.748525	0.00080153	0.00907192	not	21.7547	18 - 25.8	1.47562	0.897205	0.0626023	0.112872	not	38.4951	26.9 - 54.1	2.59278	1.39385	0.00878678	0.0661349	not	not
YOL164W-A	YOL164W-A	14.812	12.3 - 17.9	9.57715	8.79 - 10.6	0.652448	0.559351	0.000106392	0.00626999	repressed	12.8245	12.7 - 12.7	0.86802	0.527771	0.000711483	0.00771295	repressed	17.6726	14.2 - 21.9	1.194	0.641883	0.00438403	0.0514808	not	not
YOR381W-A	YOR381W-A	14.837	10.6 - 21.3	12.6899	11.5 - 14.1	0.857078	0.734782	0.0209665	0.0502485	not	15.4693	13.4 - 17.7	1.03261	0.627843	0.0171575	0.0433809	repressed	19.1165	18.3 - 20.1	1.28784	0.692331	0.0147437	0.0815953	not	not
YGL033W	HOP2	14.9334	14.7 - 15	11.401	9.84 - 13.1	0.764474	0.655392	0.000122914	0.00626999	repressed	17.1435	14.7 - 19.7	1.13905	0.692559	0.0125591	0.0354817	not	19.7551	18.3 - 20.9	1.32202	0.710707	0.00197826	0.0389967	not	not
YLR154W-F	YLR154W-F	14.9575	13.7 - 16.1	11.5653	10.5 - 12.6	0.775766	0.665072	0.000778101	0.0090347	repressed	15.1619	14.9 - 15.2	1.01161	0.615074	0.0017731	0.0110205	repressed	21.9111	21.6 - 22.5	1.47043	0.790491	0.00355667	0.0494216	not	not
YDR169C-A	YDR169C-A	14.973	11.6 - 19.6	9.84684	9.72 - 9.91	0.657619	0.563784	0.000593047	0.00794852	repressed	16.0163	12.4 - 20.2	1.05202	0.639647	0.0204095	0.0490382	repressed	18.3173	16.4 - 20.3	1.22375	0.657877	0.00165269	0.0360325	repressed	not
YLR445W	YLR445W	15.0446	13.8 - 16.6	12.8108	12.7 - 13	0.851672	0.730148	0.00234641	0.0134505	not	17.9512	14.4 - 22	1.17795	0.716216	0.0317999	0.0677696	not	19.8557	16.3 - 24.5	1.3193	0.709241	0.00122421	0.033129	not	not
YFL011W	HXT10	15.0456	12.6 - 17.8	14.0939	14.1 - 14.1	0.943695	0.80904	0.013206	0.0363295	not	19.1713	18.2 - 20.1	1.28099	0.778864	0.0145073	0.0387192	not	20.1473	18.2 - 22	1.3442	0.722626	0.00558826	0.0565424	not	not
YMR018W	YMR018W	15.0576	14.7 - 15.3	14.2444	11.9 - 17.5	0.945281	0.8104	0.0394096	0.0793807	not	20.8184	17.4 - 25	1.37313	0.834888	0.122879	0.191672	not	20.8038	20.7 - 20.8	1.38327	0.743632	0.00192721	0.0386535	not	not
YLR385C	SWC7	15.1408	10.6 - 20.8	10.8937	9.66 - 12	0.730835	0.626553	0.00120828	0.0103216	repressed	14.779	13.6 - 15.9	0.98194	0.597036	0.0058703	0.0214902	repressed	20.8314	15 - 28.4	1.3818	0.742843	0.049323	0.150683	not	not
YEL076C	YEL076C	15.148	14.5 - 15.7	12.8265	9.16 - 17.9	0.839862	0.720023	0.0266998	0.0599023	not	21.9974	20.7 - 23.1	1.45271	0.883273	0.0749432	0.130304	not	22.2689	21.6 - 22.5	1.47036	0.790449	0.00579528	0.0571803	not	not
YAL065C	YAL065C	15.1523	13.4 - 17.1	14.433	14.2 - 14.5	0.952639	0.816708	0.0166091	0.0424548	not	18.0942	13.6 - 23	1.17392	0.713762	0.0450668	0.0875188	not	23.743	18.1 - 30.3	1.56508	0.841369	0.0371128	0.127466	not	not
YDR402C	DIT2	15.2695	13.1 - 18	10.9044	9.81 - 12.3	0.71305	0.611306	0.00097852	0.00978889	repressed	15.7073	14.9 - 16.5	1.02473	0.623055	0.0017522	0.0109848	repressed	21.4129	19.5 - 23.3	1.39827	0.751695	0.0101657	0.070984	not	not
YML054C-A	YML054C-A	15.2871	12.7 - 18.3	13.0936	13.1 - 13.1	0.863917	0.740645	0.00326675	0.0157651	not	16.5493	11.5 - 23.2	1.0914	0.663589	0.000626282	0.00750774	repressed	20.9472	18.1 - 23.6	1.38219	0.743049	0.00229531	0.0412752	not	not
YKR034W	DAL80	15.302	14.3 - 16.4	14.1172	13.4 - 15	0.923262	0.791523	0.00357093	0.0166095	not	20.5381	17.1 - 24.6	1.33171	0.809699	0.080341	0.137575	not	24.9141	22.9 - 27.3	1.62958	0.876044	0.0372646	0.127661	not	not
YDL037C	BSC1	15.3334	11.7 - 20	13.7526	13.1 - 14.4	0.897138	0.769126	0.023884	0.0551605	not	18.9238	12.8 - 26.1	1.20825	0.734637	0.0958457	0.158001	not	23.0623	17.5 - 30.4	1.48935	0.800659	0.109872	0.241616	not	not
YFR012W-A	YFR012W-A	15.3773	15.1 - 15.5	13.8045	NA	0.895704	0.767897	0.0225815	0.0529524	not	17.8727	NA	1.15947	0.704977	0.00485141	0.0191484	not	26.862	NA	1.71242	0.920578	0.560038	0.694339	not	not
YOR255W	OSW1	15.3795	13.6 - 17.5	12.9981	12.6 - 13.5	0.844803	0.724259	0.00367489	0.0167815	not	17.6189	15.7 - 20	1.14438	0.695801	0.00219651	0.0120936	not	19.2962	18.5 - 19.9	1.25223	0.673189	0.0014841	0.0351355	not	not
YHR213W	YHR213W	15.5088	12.1 - 19.3	11.5386	8.33 - 15.8	0.74433	0.638122	0.0123121	0.0348011	repressed	16.9281	11.7 - 25	1.07501	0.653626	0.0389881	0.0784209	not	20.7676	18.5 - 23.7	1.34934	0.725392	0.00855201	0.0656735	not	not
YKL037W	AIM26	15.5351	12.1 - 19.9	10.7635	9.46 - 12.6	0.699021	0.599279	0.001405	0.0109008	repressed	16.173	15.5 - 16.5	1.0487	0.637627	0.00276237	0.0137656	repressed	19.0833	14.2 - 25.2	1.22819	0.660261	0.010913	0.0726161	not	not
YHR126C	ANS1	15.5931	12.8 - 18.2	13.1119	11.1 - 15.1	0.846647	0.72584	0.00148677	0.0109521	not	17.0596	16.3 - 17.8	1.0994	0.668454	0.002452	0.012782	not	22.6963	20.7 - 24.6	1.46715	0.788727	0.00552373	0.0561962	not	not
YGR273C	YGR273C	15.6016	14.8 - 16.7	13.5594	11.5 - 16.2	0.867627	0.743826	0.0102463	0.0308797	not	19.7729	13.3 - 29.4	1.26556	0.769483	0.00611548	0.0220173	not	23.8697	19.3 - 29.3	1.52277	0.818628	0.050324	0.152333	not	not
YGL205W	POX1	15.6016	14.6 - 16.7	12.7183	10.7 - 15.3	0.813871	0.697741	0.00423291	0.0180555	not	17.2993	14.5 - 20	1.10943	0.67455	0.000533082	0.00701189	not	23.9808	21.6 - 26.5	1.53869	0.827186	0.00841927	0.0656735	not	not
YDL186W	YDL186W	15.6067	13.7 - 18.2	13.3223	11.5 - 15	0.8531	0.731372	0.00188087	0.011953	not	20.9639	16.7 - 25.9	1.34338	0.816795	0.0145167	0.0387192	not	24.2927	21 - 28.3	1.55075	0.833668	0.060691	0.168351	not	not
YPL021W	ECM23	15.8096	15.5 - 16.1	12.4045	11.1 - 13.9	0.786369	0.674162	0.000160825	0.00626999	not	17.2511	16 - 18.6	1.08682	0.660802	0.00408231	0.0171034	repressed	21.5172	17.3 - 27	1.3556	0.728756	0.00983136	0.069682	not	not
YKR103W	NFT1	15.836	14.5 - 17.6	15.1199	12.5 - 19.3	0.952998	0.817016	0.0430157	0.0847296	not	22.1861	14.7 - 33.3	1.39733	0.849602	0.0545203	0.101337	not	26.0327	25.6 - 26.9	1.64444	0.884037	0.0613667	0.16923	not	not
YML003W	YML003W	15.8654	14.8 - 16.7	19.0016	18.2 - 19.7	1.20212	1.03059	0.524308	0.606563	not	24.6022	17.2 - 33.9	1.53466	0.9331	0.580361	0.659538	not	29.3451	27.8 - 31	1.85714	0.99838	0.972997	0.982201	not	not
YGL188C-A	YGL188C-A	15.8654	14.8 - 16.7	11.7521	10.6 - 13.2	0.743294	0.637234	9.27789e-05	0.00626999	repressed	18.1324	14.8 - 21.9	1.14743	0.697656	0.000469775	0.00673898	not	25.2745	23.9 - 26.4	1.59943	0.85984	0.0191036	0.0904941	not	not
YNL269W	BSC4	15.8882	12.2 - 20.1	13.0908	12.8 - 13.4	0.824257	0.706644	0.00580967	0.0218644	not	16.8055	16.7 - 16.7	1.05353	0.640562	0.00508615	0.0197849	repressed	21.6643	17.6 - 25.9	1.36379	0.73316	0.00797563	0.0646278	not	not
YOL013W-B	YOL013W-B	15.9105	13.5 - 18.7	14.2001	13.5 - 14.8	0.898643	0.770416	0.00625192	0.0227547	not	19.273	14.3 - 25.5	1.19909	0.729064	0.0539686	0.100741	not	23.4426	20.2 - 27.2	1.47791	0.794512	0.0251969	0.103496	not	not
YCL066W	HMLALPHA1	15.9105	13.3 - 18.3	13.7602	11.6 - 15.9	0.870412	0.746213	0.00176834	0.0116347	not	18.4414	17.8 - 18.6	1.16252	0.70683	0.00629491	0.0224342	not	18.2366	14.7 - 21.9	1.14522	0.61566	0.00236929	0.041617	repressed	not
YGL170C	SPO74	15.9105	13.6 - 18.3	12.5883	9.31 - 16.5	0.792976	0.679827	0.0016155	0.0112253	not	18.123	16 - 20	1.1461	0.696849	0.00159652	0.0105367	not	19.1419	18.7 - 19.6	1.21073	0.650874	0.000431371	0.0237126	repressed	not
YOR068C	VAM10	16.0812	14.2 - 18.2	13.8652	9.96 - 19.8	0.855778	0.733668	0.0307382	0.0658792	not	21.7357	18.5 - 25.7	1.34189	0.815889	0.0869077	0.146077	not	25.6923	19.5 - 34.4	1.58268	0.850831	0.164146	0.312807	not	not
YCR101C	YCR101C	16.0897	15.8 - 16.2	15.1051	9.71 - 24.4	0.931927	0.798951	0.0957232	0.156161	not	19.0067	17.6 - 20.1	1.18253	0.718999	0.00228485	0.0123205	not	21.6643	17.9 - 25.7	1.3499	0.725691	0.000600104	0.026911	not	not
YNL196C	SLZ1	16.0897	15.9 - 16.3	17.1011	15.3 - 19.3	1.06581	0.913726	0.117146	0.182478	not	23.1445	15.9 - 34.5	1.41295	0.859097	0.311651	0.40466	not	25.6923	18.7 - 35.1	1.58611	0.852676	0.146209	0.290442	not	not
YGL006W-A	YGL006W-A	16.0897	16 - 16	14.7463	11.2 - 19.9	0.915183	0.784596	0.0313413	0.0666916	not	18.7582	17.5 - 19.9	1.16241	0.706763	0.00730373	0.0246505	not	24.2927	21.1 - 28.5	1.50823	0.810809	0.0255776	0.104068	not	not
YBR072C-A	YBR072C-A	16.1082	13.2 - 20	14.2177	12 - 16.4	0.882035	0.756178	0.00843936	0.0273229	not	23.2995	15.4 - 33.4	1.44193	0.876718	0.166101	0.24478	not	29.2506	27.8 - 30.4	1.81506	0.975761	0.748552	0.840876	not	not
YDL159W-A	YDL159W-A	16.1082	12.9 - 19.7	14.7366	11.6 - 18	0.912458	0.782261	0.0189321	0.0463415	not	21.3344	16 - 27.9	1.32413	0.805096	0.0254865	0.0576376	not	22.6919	21.6 - 23.6	1.4085	0.757198	0.00900877	0.0669192	not	not
YEL069C	HXT13	16.1478	13.9 - 18.5	12.8996	11.2 - 15.1	0.802805	0.688254	0.00302454	0.0153424	not	17.0589	16.6 - 17.5	1.05834	0.643486	0.00253475	0.0130451	repressed	20.976	20.5 - 21.4	1.30584	0.702008	0.00156437	0.0359677	not	not
YAL064W	YAL064W	16.2162	14.4 - 18.3	17.1644	13.8 - 20.2	1.05414	0.903725	0.1828	0.26063	not	22.5414	18.9 - 26.3	1.39034	0.845353	0.0258379	0.0581997	not	40.2652	35.7 - 45.3	2.48022	1.33334	0.00424396	0.0512948	not	not
YOR384W	FRE5	16.2748	16.1 - 16.3	13.7365	9.7 - 19.7	0.839141	0.719405	0.0205188	0.0494479	not	18.016	14.5 - 22.8	1.10918	0.674397	0.00025024	0.0060363	not	22.8816	21.5 - 24.8	1.40582	0.755753	0.00407213	0.0512948	not	not
YKR015C	YKR015C	16.2799	14.3 - 18.5	11.2469	9.2 - 13.4	0.694371	0.595292	8.06779e-05	0.00626999	repressed	14.8227	12.9 - 16.8	0.905157	0.550351	0.00222173	0.0121412	repressed	20.2856	19.8 - 20.8	1.25254	0.673352	0.000571971	0.0263013	not	not
YOR183W	FYV12	16.3375	13.7 - 19.4	14.0607	10.7 - 18.6	0.855693	0.733595	0.0266339	0.0597783	not	18.2395	15.6 - 21.3	1.10567	0.672263	0.0130558	0.0363763	not	22.6604	17.9 - 28.7	1.37555	0.73948	0.0257395	0.10436	not	not
YNL018C	YNL018C	16.3494	15.5 - 17.4	14.433	14.4 - 14.4	0.886305	0.759839	0.00195177	0.0121273	not	19.9498	16.8 - 23.9	1.22508	0.744869	0.00118419	0.00912653	not	25.1846	21.5 - 30.5	1.54105	0.828454	0.0363185	0.1261	not	not
YDR194W-A	YDR194W-A	16.4634	12.5 - 21	14.2841	6.92 - 26.3	0.854105	0.732233	0.0699912	0.122447	not	16.6294	14.6 - 18.8	1.01157	0.615052	0.00557202	0.0208711	repressed	21.9661	14.8 - 32	1.34357	0.722287	0.00902747	0.0669192	not	not
YDR446W	ECM11	16.4763	13.5 - 20.2	12.8228	10.9 - 14.8	0.777501	0.66656	0.00127998	0.0104931	repressed	16.419	12.9 - 21.1	0.996499	0.605888	0.000497016	0.00689001	repressed	21.587	19.6 - 23.6	1.31015	0.704326	0.00240912	0.0421856	not	not
YKL221W	MCH2	16.5486	13.5 - 19.6	14.8158	14.3 - 15.6	0.902533	0.773751	0.00664812	0.0236489	not	18.2307	15.3 - 22.1	1.11053	0.67522	0.00075039	0.00771295	not	21.0047	17.1 - 25.7	1.26995	0.682711	0.00718905	0.0620792	not	not
YGR226C	YGR226C	16.5522	11.6 - 21.9	11.222	10.2 - 12.1	0.68891	0.59061	0.000716174	0.00877853	repressed	17.2245	13.6 - 21.3	1.04241	0.633801	0.0161566	0.0417268	repressed	20.7866	20.8 - 20.8	1.27472	0.685277	0.004593	0.0525685	not	not
YDL114W	YDL114W	16.5693	15.6 - 17.5	11.386	11.1 - 11.6	0.687824	0.589679	6.81921e-05	0.00626999	repressed	15.4776	10.7 - 22.3	0.911276	0.554071	0.00917131	0.0286433	repressed	22.9067	17.7 - 28.7	1.38225	0.743081	0.00210842	0.0394875	not	not
YAR064W	YAR064W	16.5765	14.5 - 18.7	16.5768	12.7 - 22.2	0.99712	0.854842	0.120156	0.185988	not	19.9498	16.3 - 23.9	1.20356	0.731783	0.00252588	0.0130282	not	26.1157	18.9 - 35	1.57028	0.844167	0.0675896	0.179477	not	not
YGL258W-A	YGL258W-A	16.5838	16.5 - 16.6	14.1331	9.59 - 21.7	0.846229	0.725481	0.0299624	0.0648306	not	19.0884	17.2 - 21.4	1.14551	0.696487	0.00904229	0.0283814	not	21.9111	21.2 - 22.4	1.32438	0.711974	0.000521233	0.0257459	not	not
YPR201W	ARR3	16.6267	13.7 - 20.3	17.5104	16 - 19.1	1.05016	0.900309	0.190222	0.269176	not	19.2241	18.4 - 19.9	1.15073	0.699666	0.0095885	0.0293466	not	27.758	18.6 - 42.5	1.64995	0.886995	0.331771	0.489947	not	not
YGL258W	VEL1	16.671	10.4 - 26.9	17.597	10.2 - 29.9	1.04484	0.895756	0.537612	0.619546	not	18.7708	17.6 - 20.1	1.12519	0.684132	0.0329989	0.069597	not	22.0512	19.6 - 24.7	1.32441	0.711992	0.0371718	0.127575	not	not
YJL037W	IRC18	16.7141	12 - 23.9	16.9333	8.01 - 35.5	0.983822	0.843441	0.414574	0.503074	not	18.2228	12.1 - 26.7	1.06444	0.647195	0.0475606	0.0915598	not	26.7372	23.1 - 31.9	1.5972	0.858639	0.20549	0.361284	not	not
YHL015W-A	YHL015W-A	16.7528	15.4 - 18	13.5322	12 - 15.1	0.808027	0.692731	0.00046152	0.00731193	not	17.5459	15.6 - 19.5	1.03886	0.631647	0.00448242	0.0181739	repressed	22.5569	20.5 - 24.7	1.34726	0.724275	0.000888495	0.0305548	not	not
YJL105W	SET4	16.8545	15.9 - 18	14.7014	12.5 - 17.3	0.874205	0.749466	0.00687691	0.024176	not	18.1658	13.7 - 23.8	1.08192	0.657826	0.000172627	0.0060363	repressed	24.9947	20.7 - 29.4	1.48761	0.799726	0.00553417	0.0561962	not	not
YAL018C	YAL018C	16.9005	15.2 - 18.5	13.9629	13.2 - 15	0.830581	0.712066	0.000554842	0.00776823	not	17.648	17.1 - 18	1.04527	0.635545	0.00166008	0.0107185	repressed	24.0559	20.7 - 28.2	1.4245	0.765795	0.0138931	0.0792132	not	not
YGR067C	YGR067C	16.9022	14.6 - 19.8	23.1187	23.1 - 23.1	1.37629	1.17991	0.0216932	0.0514668	not	33.6768	30.6 - 37	2.00464	1.21886	0.0225108	0.0526773	not	33.0966	28.7 - 38.5	1.96929	1.05867	0.388342	0.544046	not	not
YOR316C-A	YOR316C-A	16.9115	15.8 - 18.2	12.7783	12.3 - 13.2	0.758362	0.650152	0.000448439	0.00723738	repressed	18.7725	18.4 - 19.4	1.11178	0.675978	0.00160502	0.0105739	not	25.268	20.8 - 30	1.49843	0.80554	0.00847356	0.0656735	not	not
YMR084W	YMR084W	16.9133	14.6 - 19.6	14.8604	14.4 - 15.6	0.884758	0.758513	0.00418983	0.0179392	not	22.1516	21.5 - 22.5	1.31762	0.801135	0.0149439	0.0395704	not	19.907	19.9 - 19.9	1.1836	0.636291	0.00047031	0.0244043	repressed	not
YIL060W	YIL060W	16.9811	16.9 - 16.9	12.6046	11.3 - 14.2	0.743599	0.637495	8.28517e-05	0.00626999	repressed	16.7792	14.7 - 19	0.989117	0.6014	0.000186405	0.0060363	repressed	23.7495	22.1 - 25.3	1.40161	0.753494	0.000993368	0.031964	not	not
YIL134C-A	YIL134C-A	16.988	16.2 - 17.8	12.5706	8.93 - 17.6	0.737052	0.631883	0.00451532	0.0187176	repressed	17.0366	15.7 - 18.4	0.999718	0.607845	0.00161255	0.0105739	repressed	22.8872	19.2 - 27.7	1.35101	0.726289	0.000715638	0.0279148	not	not
YOR268C	YOR268C	17	16.1 - 17.9	11.7837	2012-10-14	0.694633	0.595516	5.01515e-05	0.00626999	repressed	19.3152	12.2 - 29.9	1.10793	0.673638	0.0487453	0.0934272	not	23.6691	21.7 - 25.9	1.39357	0.749171	0.0041513	0.0512948	not	not
YNL093W	YPT53	17.0218	13.5 - 21.2	14.1262	12.6 - 16.2	0.829563	0.711193	0.00318725	0.0155915	not	20.3995	17.1 - 24.3	1.18714	0.7218	0.0306421	0.065848	not	31.5449	29.8 - 33.1	1.85299	0.996151	0.957747	0.976245	not	not
YLR307C-A	YLR307C-A	17.064	12.1 - 23	12.2901	12.3 - 12.3	0.732025	0.627573	0.00161905	0.0112253	repressed	18.7129	15.5 - 22.2	1.11455	0.677666	0.00347142	0.0156293	not	30.3842	28.6 - 32.8	1.80901	0.972508	0.740187	0.834795	not	not
YOR011W-A	YOR011W-A	17.0853	16.3 - 17.9	13.1009	12.4 - 14	0.766819	0.657403	0.000814297	0.00907192	repressed	18.718	18.7 - 18.7	1.09342	0.664818	0.00163315	0.0106173	repressed	21.8676	20.8 - 23	1.27861	0.687366	0.00112754	0.0323362	not	not
YGL015C	YGL015C	17.0997	16.5 - 17.6	17.4368	14.1 - 22.4	1.02058	0.874957	0.104909	0.167428	not	18.4116	15.6 - 21.4	1.07918	0.65616	0.000268415	0.0060363	repressed	31.1485	28.2 - 33.4	1.82572	0.981488	0.709643	0.812334	not	not
YFR012W	YFR012W	17.0997	16.5 - 17.6	16.0048	13.7 - 18.4	0.93684	0.803163	0.00443441	0.018587	not	17.8464	16.4 - 19.3	1.04451	0.635079	0.000506431	0.00693552	repressed	26.341	22.7 - 29.7	1.54393	0.830003	0.0089602	0.0667217	not	not
YMR159C	ATG16	17.0997	16.4 - 17.8	13.8045	11.2 - 17.1	0.806149	0.691121	0.00555926	0.0212598	not	17.0485	16.3 - 17.8	0.996626	0.605965	0.000538321	0.00706219	repressed	28.8581	26 - 31.7	1.69182	0.909504	0.089236	0.212657	not	not
YHR160C	PEX18	17.1262	17.1 - 17.1	13.5605	11.6 - 15.8	0.792616	0.679518	0.000209317	0.00626999	not	19.109	13.2 - 26.3	1.11699	0.679151	0.000341701	0.00623439	not	23.213	22.5 - 24.2	1.3565	0.729242	0.00127343	0.033345	not	not
YJR150C	DAN1	17.178	2012-11-25	10.8867	10.9 - 10.9	0.647934	0.555481	0.00122341	0.0103742	repressed	17.0485	16.3 - 17.7	1.01161	0.615078	0.00500389	0.0195186	repressed	21.0512	16.1 - 27.6	1.25123	0.672647	0.00766812	0.063687	not	not
YOR214C	YOR214C	17.2335	16.9 - 17.5	14.6171	11.5 - 18.9	0.847059	0.726193	0.00860054	0.0276547	not	19.5143	16.6 - 23	1.12421	0.683537	0.010166	0.0305083	not	25.6913	19.2 - 33.7	1.48948	0.800729	0.0145651	0.0813823	not	not
YLR012C	YLR012C	17.2622	17.1 - 17.5	12.4428	10.9 - 14.4	0.720942	0.618072	0.000686412	0.00855142	repressed	16.7565	15.1 - 18.9	0.964414	0.58638	0.00193102	0.0113533	repressed	22.336	16.4 - 29.4	1.28245	0.689432	0.0112466	0.073369	not	not
YBL044W	YBL044W	17.3143	9.91 - 26.5	16.06	12.8 - 19.3	0.950675	0.815024	0.135136	0.204147	not	17.8464	16.6 - 18.9	1.05903	0.643909	0.0114487	0.0332925	repressed	21.8676	20.5 - 23	1.29761	0.697583	0.0225763	0.0984514	not	not
YDR374C	YDR374C	17.3318	15.2 - 19.3	15.3103	14.3 - 16.5	0.888473	0.761698	0.00340389	0.0161785	not	17.6055	17.5 - 17.6	1.01865	0.619357	0.000841009	0.00802751	repressed	25.6639	22.7 - 29.6	1.48636	0.799053	0.0135723	0.0788891	not	not
YCR108C	YCR108C	17.3386	15.5 - 19.3	18.7083	9.77 - 32	1.04844	0.898835	0.475389	0.559118	not	17.7709	16.4 - 19.1	1.01842	0.619218	0.00265373	0.0134852	repressed	25.5338	21.2 - 31.3	1.46821	0.789295	0.0190661	0.0903923	not	not
YPR159C-A	YPR159C-A	17.3532	15.6 - 19.3	13.9745	12.8 - 15.2	0.805356	0.69044	0.00057071	0.00782992	not	19.0067	18.1 - 20.2	1.09374	0.665013	0.00130721	0.00961186	repressed	24.3718	23.5 - 25.4	1.40477	0.755191	0.0024396	0.0423263	not	not
YGL192W	IME4	17.3532	15.3 - 19.7	13.3183	8.8 - 18.8	0.759238	0.650903	0.00388654	0.0172365	repressed	15.4693	13.6 - 17.7	0.881139	0.535747	0.00189553	0.0113402	repressed	26.1157	18.7 - 34.7	1.50038	0.806592	0.0257652	0.10439	not	not
YMR094W	CTF13	17.356	17.3 - 17.3	20.8077	15.1 - 27.8	1.19852	1.0275	0.71452	0.77272	not	32.5348	29.1 - 36.7	1.87721	1.14137	0.0350451	0.0727128	not	34.7504	17.3 - 69.6	1.9471	1.04674	0.773873	0.858408	not	not
YFL012W	YFL012W	17.3665	16.2 - 18.5	15.3707	12.6 - 18.1	0.883877	0.757757	0.00253751	0.0139158	not	19.491	17.4 - 22.1	1.12258	0.682546	0.000742873	0.00771295	not	30.3321	25.3 - 36.6	1.74427	0.9377	0.342809	0.502052	not	not
YOL132W	GAS4	17.3818	16 - 18.8	15.4715	12.9 - 18	0.892054	0.764767	0.00183946	0.0118093	not	19.0884	16.9 - 21.3	1.09419	0.665289	0.00546958	0.0206801	repressed	22.6429	21.3 - 24.4	1.30554	0.701847	0.00111196	0.0322848	not	not
YMR174C	PAI3	17.3852	13.3 - 22.3	14.5401	12.9 - 16.2	0.846	0.725285	0.00363836	0.0167034	not	24.5895	11.5 - 51	1.3668	0.831039	0.39744	0.489743	not	27.9485	26.6 - 29.9	1.62729	0.874813	0.0948202	0.220429	not	not
YLR393W	ATP10	17.4291	13 - 23	16.92	13.3 - 20.2	0.967133	0.829133	0.0833608	0.139783	not	20.9882	16.5 - 27.1	1.18934	0.723137	0.0512305	0.0968222	not	31.2088	28.7 - 34.4	1.79064	0.96263	0.661344	0.777619	not	not
YIL102C	YIL102C	17.5107	11.1 - 26.9	11.5881	9.76 - 13.5	0.678089	0.581333	0.0024452	0.0136378	repressed	14.9258	14.3 - 15.3	0.870378	0.529205	0.00241774	0.0126853	repressed	20.7676	18.7 - 23.5	1.21247	0.651814	0.0104195	0.0712837	not	not
YJR154W	YJR154W	17.5717	11.2 - 26.5	13.521	9.99 - 18.9	0.767188	0.657718	0.0242199	0.0557313	not	20.2072	12.2 - 32.2	1.11852	0.68008	0.0916539	0.152245	not	23.9058	21.4 - 26.7	1.36534	0.733995	0.0274123	0.107623	not	not
YBL013W	FMT1	17.6239	16.6 - 18.5	17.2815	12.3 - 22.4	0.973224	0.834356	0.0621721	0.111775	not	18.1765	16.8 - 19.1	1.02624	0.623974	0.00205182	0.0117342	repressed	23.4008	16.8 - 31.5	1.32589	0.712787	0.00201387	0.0394076	not	not
YLR030W	YLR030W	17.6239	16.7 - 18.9	15.1753	14.6 - 15.7	0.861771	0.738805	0.00116139	0.0101822	not	20.7308	16.9 - 25.2	1.16612	0.709019	0.0169673	0.0430925	not	26.6072	21.6 - 33	1.50369	0.808371	0.0351857	0.123455	not	not
YBR221W-A	YBR221W-A	17.6241	9.35 - 34.1	13.1263	11.1 - 15.4	0.754979	0.647251	0.0352088	0.0730794	not	13.965	12.2 - 15.2	0.796493	0.484281	0.00810885	0.0263131	repressed	20.4248	17.4 - 23.8	1.17035	0.629171	0.0338499	0.121174	not	not
YJR151W-A	YJR151W-A	17.6381	16.9 - 18.4	14.9693	2012-12-19	0.848488	0.727418	0.00706077	0.024522	not	35.1403	23.9 - 54.5	1.97589	1.20138	0.136177	0.20811	not	24.3161	18.5 - 32.5	1.37169	0.737404	0.0143037	0.0807401	not	not
YDL245C	HXT15	17.6381	17 - 18.1	14.7366	12 - 17.9	0.83541	0.716206	0.000900033	0.00938269	not	17.2993	14.5 - 20	0.982887	0.597612	0.000101961	0.0060363	repressed	21.1289	20.1 - 22.1	1.19852	0.644312	0.000436017	0.0237126	repressed	not
YML037C	YML037C	17.6759	NA	16.0797	11.4 - 23.2	0.909001	0.779296	0.0443631	0.0868828	not	25.8208	19.6 - 34.9	1.45167	0.882642	0.300994	0.394444	not	33.0966	28.9 - 38.1	1.87975	1.01054	0.861581	0.91876	not	not
YIL037C	PRM2	17.7278	16.6 - 18.8	12.7976	12.7 - 13	0.724576	0.621187	0.000159568	0.00626999	repressed	21.126	19.8 - 22.2	1.195	0.72658	0.00191666	0.0113402	not	26.3112	17 - 42.6	1.46377	0.786911	0.10058	0.228742	not	not
YHL009W-A	YHL009W-A	17.8301	11.9 - 25.4	16.2362	16 - 16.5	0.929009	0.79645	0.045524	0.0885127	not	21.0483	17.6 - 24.3	1.20453	0.732376	0.0152886	0.0402123	not	33.0814	21 - 51.6	1.86948	1.00502	0.970666	0.981384	not	not
YHR021W-A	ECM12	17.8339	13.5 - 22.8	16.0179	12.1 - 22.5	0.907384	0.77791	0.0457012	0.0887353	not	18.8824	18.6 - 18.9	1.06975	0.650424	0.00396844	0.0168637	repressed	26.0025	18.8 - 35.7	1.47205	0.791357	0.0408775	0.134577	not	not
YFL052W	YFL052W	17.9041	16.1 - 19.7	17.7141	17.2 - 18.4	0.989354	0.848184	0.0226286	0.0530408	not	26.5649	20.6 - 34	1.48215	0.901175	0.139456	0.212376	not	33.6006	22.7 - 47.5	1.86129	1.00061	0.995028	0.996936	not	not
YHL018W	YHL018W	17.9041	16.2 - 19.7	14.7366	11.8 - 17.7	0.821092	0.703931	0.00141871	0.010903	not	19.0347	18.3 - 19.6	1.05908	0.643938	0.00214699	0.0120351	repressed	22.6604	17.9 - 29.5	1.25558	0.674987	0.00678598	0.0608234	not	not
YAL064W-B	YAL064W-B	17.9262	14.6 - 21.4	18.0193	16.3 - 19.9	1.00518	0.861747	0.0694291	0.121682	not	20.5969	18.4 - 22.4	1.14807	0.698047	0.00334083	0.0153475	not	32.7904	22.9 - 46.2	1.8117	0.973949	0.812904	0.885893	not	not
YPR151C	SUE1	17.9262	14.7 - 21.9	13.2429	9.21 - 19.6	0.731818	0.627396	0.00940251	0.0292135	repressed	20.0522	13.6 - 28.5	1.1169	0.679095	0.00219056	0.0120936	not	26.9154	21.8 - 32.5	1.49961	0.806174	0.0257002	0.104276	not	not
YJL214W	HXT8	17.9322	16.6 - 19	14.9302	13.8 - 16	0.835561	0.716335	0.000418476	0.00723738	not	22.5633	17.4 - 28.9	1.24826	0.758963	0.0478167	0.0919589	not	26.7681	24.8 - 28.4	1.49839	0.805522	0.00390942	0.0512948	not	not
YFL067W	YFL067W	17.9726	13.3 - 24.4	17.2815	12.3 - 22.9	0.954213	0.818057	0.0982653	0.159433	not	21.4215	17.6 - 25.5	1.18148	0.718361	0.0363199	0.0746458	not	27.9455	22.3 - 33.9	1.5537	0.835256	0.0849961	0.205972	not	not
YOL156W	HXT11	17.9726	13.3 - 24	15.5253	12.1 - 19.5	0.860779	0.737955	0.01646	0.042298	not	22.6524	14 - 37.2	1.25346	0.762127	0.0400448	0.0801178	not	40.7717	26.5 - 60.5	2.24541	1.20711	0.166917	0.315804	not	not
YAL064C-A	YAL064C-A	17.9726	13.1 - 24.4	12.299	11.4 - 13.2	0.684226	0.586594	0.00144957	0.0109521	repressed	15.6123	15.2 - 15.9	0.863995	0.525323	0.00137952	0.00987569	repressed	21.7966	16.3 - 27.7	1.21162	0.651357	0.00313031	0.0468023	repressed	not
YOL019W-A	YOL019W-A	18.045	14.1 - 23.1	13.5597	11.2 - 16.5	0.750568	0.64347	0.00157396	0.0111558	repressed	22.6057	14.7 - 33	1.24954	0.759744	0.0204325	0.0490519	not	22.6967	16.3 - 30.3	1.25541	0.674894	0.00401002	0.0512948	not	not
YPL201C	YIG1	18.0855	16.6 - 19.6	15.6755	11.8 - 19.2	0.866285	0.742675	0.00413227	0.017787	not	24.2848	20.2 - 28.8	1.33816	0.813624	0.0766067	0.132463	not	33.1257	30.2 - 36.4	1.83912	0.988693	0.830067	0.89785	not	not
YNL130C-A	DGR1	18.0953	15.2 - 21.5	17.1652	16.8 - 17.8	0.948358	0.813037	0.0168162	0.0427483	not	21.5431	21.3 - 21.8	1.1882	0.722447	0.00639492	0.0226911	not	25.8703	20.5 - 32.5	1.42609	0.76665	0.0128856	0.0779718	not	not
YHR213W-A	YHR213W-A	18.1529	12.2 - 24.5	16.3043	13.9 - 19.7	0.914454	0.783971	0.0453475	0.0883215	not	17.8807	16 - 19.9	1.00277	0.609701	0.00211485	0.0119258	repressed	29.0062	19 - 42.3	1.61415	0.867748	0.265475	0.423166	not	not
YLR341W	SPO77	18.1814	14.7 - 21.4	15.7209	13.6 - 17.9	0.870626	0.746397	0.00271786	0.0144612	not	16.8429	11.7 - 23.1	0.93375	0.567736	0.000101999	0.0060363	repressed	34.1073	19.4 - 54.2	1.85574	0.997627	0.985876	0.991309	not	not
YBR285W	YBR285W	18.1969	15.7 - 21.2	18.2541	12.8 - 25.6	0.992247	0.850664	0.138167	0.207673	not	25.7699	18 - 35.1	1.4111	0.857973	0.0927498	0.153749	not	46.7552	29.5 - 68	2.53082	1.36055	0.0435458	0.139861	not	not
YBR196C-B	YBR196C-B	18.2002	17.7 - 18.4	16.9294	9.59 - 26.6	0.914879	0.784336	0.0741327	0.127873	not	20.5969	18.7 - 22.2	1.13369	0.6893	0.000706441	0.00771295	not	25.6539	22.9 - 29.5	1.41021	0.758115	0.00419608	0.0512948	not	not
YOR186W	YOR186W	18.3721	17.8 - 19	19.9689	18.4 - 21.7	1.08788	0.932655	0.213564	0.294758	not	28.0948	21.8 - 35.1	1.53209	0.931537	0.228196	0.315406	not	28.685	22 - 37	1.55968	0.838469	0.0519634	0.154721	not	not
YBR019C	GAL10	18.3893	13.8 - 23.6	20.4882	17.2 - 24.2	1.12425	0.96383	0.670501	0.73538	not	26.2062	20.6 - 34.7	1.43169	0.870491	0.269866	0.360757	not	33.8524	27.1 - 41.4	1.86113	1.00053	0.995173	0.996936	not	not
YHR086W-A	YHR086W-A	18.4231	10.9 - 29.5	15.9792	13.6 - 19.2	0.892546	0.765189	0.0700358	0.122487	not	19.365	17.5 - 21	1.0765	0.654532	0.0204787	0.0491002	repressed	26.6464	19.4 - 36.1	1.47613	0.793552	0.147073	0.291569	not	not
YPL027W	SMA1	18.4708	15.4 - 21.5	15.2134	12.7 - 19.3	0.828646	0.710407	0.0047406	0.0192621	not	20.6303	17.8 - 23.5	1.12535	0.684233	0.000895365	0.00820673	not	24.7826	16.4 - 36.1	1.34255	0.721744	0.0116233	0.0744524	not	not
YGL249W	ZIP2	18.4803	17.9 - 18.8	18.0395	18 - 18	0.976705	0.837339	0.00967893	0.029736	not	28.8791	26.5 - 31.2	1.56178	0.94959	0.461782	0.550978	not	35.7703	30.2 - 42.1	1.93488	1.04017	0.526747	0.666505	not	not
YBL008W-A	YBL008W-A	18.5067	16.9 - 19.8	12.2982	11.1 - 13.5	0.666919	0.571757	2.84676e-05	0.00626999	repressed	18.5698	15.2 - 22.1	0.995252	0.60513	0.00453973	0.0183529	repressed	25.1846	21 - 31.5	1.36113	0.731729	0.00455663	0.0523827	not	not
YHL043W	ECM34	18.5581	15.8 - 21.2	19.6804	17.3 - 22.2	1.06796	0.915576	0.16854	0.244175	not	23.154	18.9 - 27.8	1.25639	0.763905	0.00293084	0.0142535	not	31.1485	28.2 - 33.4	1.68963	0.908326	0.132128	0.27185	not	not
YER078W-A	YER078W-A	18.6264	12.8 - 26.7	17.1418	15.7 - 18.3	0.920971	0.789559	0.0600733	0.108972	not	23.2116	17.2 - 31.3	1.24798	0.758793	0.037421	0.0764091	not	24.8095	17.6 - 33.2	1.32962	0.714791	0.0258407	0.104546	not	not
YCL001W-A	YCL001W-A	18.6322	18 - 19.1	13.4114	12.9 - 13.8	0.721934	0.618922	8.72021e-05	0.00626999	repressed	17.4856	16.7 - 18.1	0.936402	0.569348	0.000622967	0.00750774	repressed	21.1776	20 - 22.3	1.13946	0.612563	8.18002e-05	0.0113237	repressed	not
YML100W-A	YML100W-A	18.6377	11.5 - 28.7	20.7751	19.8 - 21.8	1.14297	0.979878	0.851362	0.883866	not	23.5166	22.2 - 24.7	1.29425	0.786924	0.0706159	0.124115	not	26.7314	17.1 - 41.5	1.45045	0.779746	0.142178	0.285467	not	not
YBR200W-A	YBR200W-A	18.7357	13.5 - 24.9	13.1009	12.1 - 14.1	0.710289	0.608938	0.00187743	0.011953	repressed	16.0824	15.5 - 16.2	0.867421	0.527407	0.00131874	0.00961186	repressed	22.6326	19.7 - 26.5	1.22274	0.657333	0.00568137	0.0567736	not	not
YJR120W	YJR120W	18.7732	17.6 - 19.9	15.8256	11.9 - 20.4	0.838575	0.718919	0.00384964	0.0171851	not	21.6647	17.7 - 26.7	1.15483	0.702158	0.000600151	0.00737924	not	26.148	24.5 - 28.6	1.39251	0.748598	0.00263321	0.0433953	not	not
YLR453C	RIF2	18.8227	14.9 - 24.5	24.9279	20.4 - 29.8	1.31625	1.12844	0.23269	0.315459	not	30.3863	28.7 - 32.4	1.61305	0.980761	0.82272	0.861282	not	42.3081	41.1 - 43.8	2.24804	1.20853	0.0469286	0.146213	not	not
YJL089W	SIP4	18.826	17.2 - 20.3	16.2442	14.5 - 18.6	0.867147	0.743415	0.00257576	0.0140352	not	29.4555	11.8 - 60.9	1.52329	0.926184	0.639227	0.712688	not	31.8417	27 - 37.1	1.69818	0.912926	0.158113	0.305226	not	not
YOL163W	YOL163W	18.8907	15.3 - 22.8	14.9693	12 - 19.6	0.797335	0.683564	0.00507389	0.0201961	not	22.2202	13.8 - 33.3	1.18171	0.718498	0.00627508	0.0223923	not	32.201	17.9 - 55.4	1.6922	0.90971	0.467196	0.617975	not	not
YDR125C	ECM18	18.8907	15.4 - 22.3	17.1418	15.3 - 18.5	0.913998	0.78358	0.00793632	0.0263117	not	22.4689	19 - 26.3	1.19154	0.724475	0.0186049	0.0459317	not	24.3112	22.8 - 25.7	1.29691	0.697207	0.00187167	0.0376827	not	not
YNR075W	COS10	18.8979	13.8 - 25.5	24.2454	20 - 29.5	1.28394	1.10073	0.319237	0.407585	not	35.6746	19.8 - 60.3	1.8538	1.12714	0.427172	0.517918	not	31.8349	25.4 - 38.6	1.68246	0.904474	0.316916	0.475584	not	not
YMR206W	YMR206W	18.9324	17.4 - 21	16.1085	15.2 - 17.5	0.851253	0.729788	0.00143514	0.0109521	not	19.7808	17.3 - 23.2	1.03717	0.630615	0.00383515	0.0165585	repressed	28.665	26.4 - 30.5	1.51366	0.81373	0.0124128	0.0767331	not	not
YPL165C	SET6	18.943	14.9 - 24.8	19.9048	19 - 21.1	1.04955	0.899791	0.206134	0.286275	not	28.1302	28.1 - 28.1	1.48416	0.902397	0.247093	0.336194	not	34.5517	26.9 - 44.2	1.81843	0.977569	0.804893	0.880431	not	not
YFL053W	DAK2	18.9879	14 - 24.5	14.9257	12.7 - 18.2	0.796327	0.6827	0.00718653	0.0247454	not	19.7991	15.7 - 24.5	1.04578	0.635849	0.0123795	0.0351323	repressed	24.5452	20.3 - 30.1	1.30601	0.702096	0.0106518	0.0718683	not	not
YMR017W	SPO20	19.0796	18.9 - 19.4	15.2372	12.3 - 18.4	0.797545	0.683744	0.000551639	0.00776823	not	24.766	20.2 - 30.1	1.29979	0.790292	0.00325568	0.0151758	not	31.5705	22.8 - 44.2	1.64793	0.885912	0.171047	0.320239	not	not
YML083C	YML083C	19.1568	14.4 - 25.6	18.0193	16.7 - 19.8	0.941416	0.807086	0.0454598	0.0884792	not	22.4509	16.4 - 30.2	1.17177	0.712454	0.00898262	0.0282411	not	26.7681	25.4 - 28.2	1.39844	0.751785	0.015017	0.0822225	not	not
YBR298C-A	YBR298C-A	19.1587	16.4 - 21.7	15.1776	14.3 - 16.4	0.797531	0.683732	0.00104354	0.00986424	not	17.3761	15.8 - 19.2	0.906345	0.551073	0.00110862	0.00896405	repressed	26.2215	25.2 - 26.7	1.37826	0.740941	0.00151454	0.0353977	not	not
YBR040W	FIG1	19.2189	15.4 - 25.1	18.8335	15.2 - 23.1	0.97383	0.834875	0.0857254	0.142943	not	22.4966	19.2 - 25.9	1.1624	0.706756	0.0183643	0.0454965	not	31.9556	19.6 - 51.1	1.6391	0.881166	0.349034	0.508404	not	not
YEL035C	UTR5	19.2349	12.8 - 28.6	12.2982	11.3 - 13.6	0.64099	0.549528	0.00130642	0.0105485	repressed	14.6738	11.9 - 18.2	0.752288	0.457404	0.00277637	0.0137747	repressed	20.7826	16.9 - 25.8	1.07595	0.578418	0.00482448	0.0536096	not	not
YFL040W	YFL040W	19.399	16.1 - 23	16.2395	10.8 - 23	0.826408	0.708489	0.0158236	0.0412245	not	23.5883	20.3 - 27	1.20952	0.735411	0.0173968	0.0437737	not	29.2068	24.4 - 35.1	1.50173	0.807317	0.0308169	0.114295	not	not
YMR317W	YMR317W	19.4236	19.1 - 19.7	15.9365	15 - 16.8	0.821581	0.70435	0.000325183	0.00682635	not	24.4376	21.1 - 28.6	1.26043	0.766364	0.00176562	0.0109982	not	37.3637	21.8 - 62.8	1.89036	1.01624	0.903233	0.943598	not	not
YOL162W	YOL162W	19.4238	16.6 - 23.3	17.1417	16.9 - 17.3	0.881966	0.756119	0.00421882	0.018036	not	29.0342	20.6 - 39.4	1.4889	0.905273	0.250347	0.339803	not	36.1696	32.4 - 40.6	1.86082	1.00036	0.995791	0.997202	not	not
YGR126W	YGR126W	19.4885	14.2 - 26.4	18.5203	16.6 - 20.8	0.964795	0.827129	0.050528	0.0955265	not	27.1606	25 - 29.7	1.41073	0.857746	0.149964	0.224277	not	28.135	22.7 - 34.6	1.45922	0.78446	0.0436908	0.140231	not	not
YGL183C	MND1	19.5979	14.8 - 24.8	15.4715	13.2 - 17.8	0.79908	0.68506	0.00267158	0.0142882	not	22.4873	12.4 - 41	1.11735	0.679366	0.0942402	0.155763	not	26.5067	20.5 - 33.7	1.36838	0.735628	0.0100332	0.0702348	not	not
YKL070W	YKL070W	19.6034	18.1 - 21.6	16.2772	15.1 - 18	0.830738	0.712201	0.00108564	0.00995202	not	20.3724	18.5 - 22.4	1.03374	0.628532	0.00238176	0.0125782	repressed	32.8742	25.8 - 41.8	1.67014	0.897853	0.216899	0.374387	not	not
YMR133W	REC114	19.6604	17.4 - 21.9	14.2891	11.4 - 18.6	0.728377	0.624445	0.00212795	0.0128215	repressed	20.6777	14.7 - 28.2	1.05745	0.642948	0.000281741	0.0060363	repressed	26.5712	16.5 - 41.6	1.34669	0.723967	0.0170238	0.0857382	not	not
YCL048W	SPS22	19.7853	16.7 - 22.8	20.7576	19.2 - 22.2	1.05646	0.905712	0.110494	0.174017	not	22.249	16.4 - 29.7	1.11607	0.678589	0.0204636	0.0490848	not	29.4905	25.4 - 33.6	1.49964	0.806193	0.0104671	0.0713274	not	not
YGL175C	SAE2	19.8493	16.6 - 22.9	14.2646	10.9 - 19.2	0.719981	0.617247	0.00297556	0.0152099	repressed	20.7678	20.1 - 21.5	1.05041	0.638665	0.0015075	0.0102235	repressed	26.7187	18.3 - 38	1.34878	0.725092	0.00801777	0.0647587	not	not
YNL194C	YNL194C	19.8981	19.7 - 20.1	16.2916	13.9 - 19.5	0.820482	0.703408	0.00147679	0.0109521	not	24.6129	20.6 - 28.8	1.23193	0.749036	0.0202609	0.0487434	not	28.997	24.6 - 33.4	1.45883	0.784252	0.00679639	0.0608234	not	not
YPR078C	YPR078C	19.9732	14.4 - 27	16.06	12.5 - 19.7	0.814018	0.697867	0.00772785	0.025953	not	31.974	30.6 - 33.5	1.62769	0.989665	0.901152	0.92302	not	35.7703	30.7 - 41.6	1.8175	0.97707	0.798014	0.877082	not	not
YHR014W	SPO13	19.9764	19.8 - 20.1	16.2163	11.7 - 19.9	0.809715	0.694177	0.00148028	0.0109521	not	24.1463	23.5 - 24.7	1.21085	0.73622	0.0020009	0.01161	not	32.4407	27.5 - 37.1	1.62648	0.87438	0.0452243	0.142739	not	not
YKL107W	YKL107W	19.9788	12.1 - 34	24.862	22.9 - 26.9	1.24798	1.0699	0.6028	0.67836	not	27.4115	27.3 - 27.5	1.37852	0.838163	0.209074	0.295034	not	41.3978	28.3 - 58.9	2.06671	1.11104	0.484129	0.631949	not	not
YBR250W	SPO23	20.0089	15 - 26.2	24.4096	23.1 - 25.6	1.23544	1.05915	0.476231	0.559876	not	25.2691	16.2 - 39.5	1.27396	0.774589	0.0379962	0.0770539	not	25.3514	17.8 - 34.3	1.27977	0.687992	0.00731629	0.0623021	not	not
YJL027C	YJL027C	20.0248	18.3 - 21.8	15.1951	13.3 - 16.8	0.758669	0.650415	0.000206265	0.00626999	repressed	26.1594	18.2 - 34.8	1.30412	0.79293	0.0112779	0.0329312	not	26.341	22.5 - 29.2	1.31573	0.707326	0.000763957	0.0286155	not	not
YOR293C-A	YOR293C-A	20.0377	20 - 20	31.5238	20.2 - 45.7	1.53889	1.31931	0.0722809	0.125714	not	36.636	34.6 - 39.1	1.83198	1.11388	0.085641	0.144354	not	65.1874	30.5 - 128	3.1444	1.6904	0.0215671	0.095693	not	not
YLR412C-A	YLR412C-A	20.0781	18 - 22.1	22.8698	17.1 - 29.6	1.13494	0.972994	0.739702	0.795123	not	38.3127	NA	1.89293	1.15093	0.269595	0.360578	not	73.8282	56.5 - 95.6	3.67074	1.97336	0.000257073	0.0191316	induced	not
YGR174W-A	YGR174W-A	20.0893	15.5 - 26.1	19.9315	14.5 - 27.1	0.990017	0.848752	0.145533	0.216903	not	20.6167	NA	1.01581	0.617628	0.00859945	0.0273742	repressed	33.2861	31.4 - 35.1	1.65702	0.8908	0.18885	0.341914	not	not
YMR063W	RIM9	20.1066	18 - 22	22.9635	21.6 - 24.9	1.14794	0.984145	0.746054	0.799844	not	35.0433	26.4 - 45.6	1.74481	1.06087	0.430125	0.52094	not	37.8695	27.2 - 54.5	1.88048	1.01093	0.903392	0.943598	not	not
YER014C-A	BUD25	20.1518	14 - 29.3	21.2137	15.1 - 30.3	1.05126	0.901259	0.3976	0.485602	not	27.4097	17.6 - 44.6	1.33494	0.811664	0.240069	0.328613	not	27.6097	22.5 - 33.6	1.36642	0.734575	0.0319878	0.11676	not	not
YNL210W	MER1	20.1885	16.8 - 24	17.9812	14.1 - 22.5	0.893301	0.765837	0.0146375	0.0391202	not	23.2295	13.3 - 39.3	1.15086	0.69974	0.0108474	0.0319545	not	23.5591	21.3 - 25.6	1.1777	0.633121	0.000293927	0.0207466	repressed	not
YLR308W	CDA2	20.2495	13.2 - 33.2	14.7014	12.6 - 17.3	0.727958	0.624086	0.00990216	0.0302085	repressed	22.3868	14.7 - 32.8	1.08771	0.661345	0.0539331	0.100741	not	33.0197	19.2 - 55.5	1.60483	0.862743	0.39989	0.554629	not	not
YML047C	PRM6	20.2701	14.9 - 28	17.6716	14 - 21	0.867684	0.743875	0.0207908	0.0499479	not	21.663	18.2 - 25.6	1.06104	0.645132	0.0102373	0.0306361	repressed	29.1155	28.1 - 30.3	1.43734	0.7727	0.0198389	0.0921253	not	not
YMR242W-A	YMR242W-A	20.2849	18.3 - 22.2	14.4735	10.3 - 19.3	0.71315	0.611391	0.000613628	0.00806682	repressed	23.2984	18.8 - 29	1.14444	0.695842	0.0136361	0.0373326	not	29.2506	27.8 - 30.8	1.44965	0.779316	0.00408477	0.0512948	not	not
YLL057C	JLP1	20.3163	15.3 - 27.3	20.0572	16.2 - 25	0.979948	0.84012	0.115828	0.180674	not	31.7724	30 - 33.9	1.56317	0.950431	0.550665	0.632315	not	35.1895	27.7 - 43.8	1.72498	0.92733	0.443719	0.595698	not	not
YOR161C-C	YOR161C-C	20.3575	19.2 - 21.7	18.0644	9.06 - 33.2	0.861597	0.738657	0.0795925	0.134783	not	24.1279	18.5 - 31.1	1.17297	0.713187	0.023493	0.0542573	not	31.4137	19.6 - 48.6	1.5256	0.820147	0.111632	0.244062	not	not
YFL055W	AGP3	20.3588	17.8 - 23.5	20.4882	17.2 - 24	1.00177	0.858826	0.0727536	0.126234	not	35.6696	24.2 - 52.8	1.73754	1.05646	0.609564	0.684732	not	33.411	29.4 - 37.6	1.64007	0.881685	0.0868096	0.209112	not	not
YLR462W	YLR462W	20.3841	19.4 - 21.2	17.7066	NA	0.871766	0.747375	0.0013901	0.0108583	not	35.1655	NA	1.71065	1.04011	0.705918	0.768709	not	43.1546	NA	2.07159	1.11367	0.475823	0.624711	not	not
YCL042W	YCL042W	20.3841	19.4 - 21.2	30.1364	27.7 - 32	1.47785	1.26698	0.00746268	0.0252748	not	29.3923	10.6 - 74.7	1.34379	0.817045	0.442217	0.532053	not	30.0042	17.4 - 48.6	1.44731	0.778059	0.104981	0.234878	not	not
YMR251W	GTO3	20.3883	16.5 - 25.2	17.2815	12.6 - 22.4	0.840622	0.720674	0.0136331	0.0371071	not	24.7393	22.5 - 27.1	1.21333	0.737724	0.00646119	0.0228403	not	31.6791	31.6 - 31.9	1.55381	0.835315	0.0425026	0.137762	not	not
YMR117C	SPC24	20.4097	16.7 - 23.8	18.2904	15.4 - 22.2	0.903494	0.774575	0.00930289	0.0290151	not	29.7697	NA	1.47036	0.894001	0.129312	0.199778	not	35.6698	20.4 - 62.1	1.7243	0.926969	0.604673	0.730776	not	not
YGL158W	RCK1	20.5556	16.7 - 25.4	24.5325	15.7 - 38.5	1.18422	1.01525	0.898068	0.920695	not	38.2151	26.4 - 51.8	1.84233	1.12017	0.304074	0.397284	not	44.0501	34.2 - 55.4	2.13778	1.14925	0.128097	0.266563	not	not
YNR063W	YNR063W	20.5652	20.3 - 20.8	23.9124	15.5 - 34.2	1.14694	0.983287	0.875681	0.903385	not	41.9929	34 - 49.1	2.04038	1.24059	0.0176911	0.0442746	not	50.2726	49.5 - 51.8	2.45152	1.31791	0.00109441	0.0322848	not	not
YNL277W-A	YNL277W-A	20.6915	18.8 - 22.8	18.1571	14.7 - 22.3	0.87242	0.747935	0.00789391	0.0262635	not	32.5225	32.5 - 32.5	1.57265	0.956195	0.435477	0.5255	not	53.1237	50.7 - 55.7	2.56768	1.38036	0.00119111	0.0327034	not	not
YOL024W	YOL024W	20.6915	18.8 - 22.9	22.8698	17.5 - 28.4	1.09629	0.939863	0.470511	0.554997	not	36.68	18.8 - 61.5	1.7319	1.05303	0.71794	0.778801	not	36.589	29.5 - 44.2	1.76335	0.94796	0.474996	0.624188	not	not
YBL071C-B	YBL071C-B	20.7039	20.4 - 20.8	18.7293	16.7 - 20.7	0.903889	0.774914	0.0038599	0.0172015	not	27.4839	20 - 36	1.32866	0.80785	0.00814972	0.0263851	not	41.0032	20.1 - 73.7	1.9287	1.03685	0.81723	0.887359	not	not
YOR134W	BAG7	20.7448	18.9 - 22.4	17.1011	15.3 - 19.8	0.828548	0.710323	0.00078271	0.0090347	not	22.7952	17.2 - 29.9	1.10397	0.671235	0.000311285	0.00609688	not	34.4193	22.1 - 51.4	1.64856	0.88625	0.281342	0.439464	not	not
YHR139C	SPS100	20.7448	19.1 - 22.1	20.2373	12.5 - 33.7	0.971886	0.833209	0.145833	0.217233	not	29.1799	20.2 - 42.8	1.39397	0.84756	0.213336	0.299784	not	41.4274	39.9 - 42.5	2.00722	1.07906	0.164631	0.313308	not	not
YOR032C	HMS1	20.7625	15.9 - 26	16.2118	14.3 - 19.3	0.790442	0.677654	0.00311201	0.0154243	not	25.0908	19.9 - 31.4	1.22387	0.744136	0.00640708	0.02272	not	38.8926	36 - 41.3	1.89589	1.01921	0.800998	0.878675	not	not
YJL043W	YJL043W	20.9277	20.5 - 21.1	19.4511	13.6 - 26.9	0.920804	0.789415	0.0417489	0.0826336	not	24.9061	20.1 - 30.5	1.18275	0.719133	0.0178203	0.0445192	not	33.65	25.6 - 43.8	1.60694	0.863873	0.0751986	0.191242	not	not
YNR066C	YNR066C	20.9841	18.8 - 23.4	30.3934	25.9 - 35.4	1.44666	1.24024	0.0303577	0.0653859	not	37.3607	24.5 - 55.3	1.77384	1.07852	0.495734	0.582683	not	48.4503	38.6 - 59	2.31397	1.24397	0.0248136	0.102737	not	not
YNR069C	BSC5	21.0403	18.3 - 24.6	26.8387	12.7 - 61.9	1.24462	1.06702	0.702745	0.764223	not	42.4805	36.3 - 48.9	2.01245	1.2236	0.0334171	0.0703152	not	40.6978	40.6 - 40.8	1.93438	1.0399	0.515712	0.657397	not	not
YMR095C	SNO1	21.0532	19.1 - 23.2	12.9056	11.9 - 13.8	0.612832	0.525387	0.000104159	0.00626999	repressed	23.1583	21.1 - 25.2	1.10044	0.669085	0.000468861	0.00673898	not	29.8404	24.8 - 36.8	1.41457	0.76046	0.00732409	0.0623021	not	not
YBL043W	ECM13	21.0646	20.4 - 21.3	29.5901	14.5 - 60.6	1.38553	1.18783	0.25878	0.343824	not	43.1795	34.1 - 51.4	2.04738	1.24484	0.022783	0.0531822	not	32.8097	30.1 - 35.1	1.5627	0.840094	0.0117085	0.0746598	not	not
YNR070W	PDR18	21.0646	20.2 - 21.9	19.3531	19.3 - 19.5	0.921112	0.789679	0.0024617	0.0136638	not	29.9572	24.7 - 37.3	1.42024	0.863528	0.121217	0.189602	not	29.9775	27.1 - 33	1.42773	0.767534	0.00170468	0.0365215	not	not
YBR180W	DTR1	21.1365	17.6 - 25.7	20.7558	17.6 - 24.3	0.981838	0.84174	0.0388852	0.0785762	not	29.2777	19.3 - 45.8	1.35845	0.82596	0.218582	0.304997	not	32.3036	21.9 - 46.4	1.51284	0.813287	0.0958794	0.22207	not	not
YOR388C	FDH1	21.239	21 - 21.5	20.8415	14 - 30.1	0.980957	0.840985	0.0734331	0.126976	not	27.2415	25.5 - 29.4	1.28284	0.779989	0.0123141	0.0350178	not	45.5822	43.3 - 47.9	2.15215	1.15697	0.0207131	0.0942674	not	not
YGR066C	YGR066C	21.2847	20.1 - 22.4	16.306	14.3 - 19.2	0.766977	0.657538	0.000451697	0.00723738	repressed	24.4739	22 - 27.8	1.14592	0.696738	0.00519543	0.0200891	not	36.6709	31.9 - 41.6	1.72348	0.926526	0.21112	0.36798	not	not
YOR192C	THI72	21.3812	20.6 - 22.1	26.104	24.1 - 29.5	1.22531	1.05047	0.312656	0.400449	not	33.1963	14.6 - 64.6	1.51195	0.919289	0.596618	0.674355	not	36.468	26.2 - 48.6	1.70319	0.915616	0.297435	0.456993	not	not
YDR223W	CRF1	21.3987	20.7 - 21.6	17.7141	17 - 18.5	0.829399	0.711053	0.000348094	0.00695696	not	19.0067	17.7 - 20.1	0.888668	0.540325	9.75912e-05	0.0060363	repressed	28.2551	27.3 - 29.4	1.32341	0.711451	0.000369545	0.0226117	not	not
YBR115C	LYS2	21.4044	17.2 - 26.3	17.109	16.6 - 17.4	0.799051	0.685035	0.00121272	0.01033	not	26.489	26.1 - 26.6	1.23602	0.751522	0.00920839	0.0286957	not	28.7769	18.9 - 42.2	1.32572	0.712694	0.0311488	0.114923	not	reliable
YFR032C	RRT5	21.44	19.5 - 23.1	15.7166	14 - 17.2	0.736103	0.631069	0.000108433	0.00626999	repressed	19.2483	11.1 - 30.4	0.897844	0.545904	0.000240413	0.0060363	repressed	34.983	31.4 - 38.5	1.63856	0.880876	0.0557687	0.160663	not	not
YLR053C	YLR053C	21.44	19.6 - 23.4	15.2022	12.9 - 18.8	0.711391	0.609883	0.000590597	0.00794852	repressed	18.1658	13.8 - 23.6	0.851439	0.517689	1.87605e-05	0.0060363	repressed	29.3451	27.9 - 30.8	1.37561	0.739517	0.000902167	0.0305548	not	not
YAR050W	FLO1	21.6107	15.9 - 27	40.954	32.2 - 49.4	1.89259	1.62254	0.0063531	0.0229019	induced	69.8928	59.1 - 81.8	3.26748	1.98669	0.000282323	0.0060363	induced	69.9555	62.1 - 78	3.28113	1.7639	0.000314619	0.0211844	induced	not
YMR323W	ERR3	21.7328	14.4 - 33.7	24.4107	23.8 - 24.9	1.12541	0.964827	0.737231	0.793488	not	29.6589	23.2 - 35.8	1.36726	0.831318	0.130092	0.200819	not	41.3299	30.4 - 55.1	1.89597	1.01925	0.878503	0.928831	not	not
YPR108W-A	YPR108W-A	21.7508	18.6 - 26.5	17.7484	8.2 - 36.9	0.791115	0.678232	0.0749127	0.128797	not	23.1445	16.2 - 34.2	1.04242	0.633808	0.0197463	0.0478734	repressed	26.6143	23.6 - 30.1	1.22146	0.656644	0.00101692	0.031964	repressed	not
YGR225W	AMA1	21.774	20.8 - 22.5	21.1333	18.8 - 23.6	0.973917	0.83495	0.0121127	0.0344615	not	22.0634	19.6 - 24.7	1.0113	0.614888	0.00141853	0.00995225	repressed	33.3745	27.2 - 41.1	1.53328	0.824277	0.0284306	0.109494	not	not
YBR033W	EDS1	21.8508	21.2 - 22.4	20.2343	11.6 - 31.7	0.906344	0.777019	0.0889826	0.147425	not	27.883	22.2 - 34.4	1.27758	0.776787	0.00284338	0.0139967	not	40.1082	38.5 - 42.9	1.83811	0.988151	0.81669	0.887284	not	not
YDL085W	NDE2	21.9728	14.4 - 33.6	21.5482	21 - 22.1	0.983419	0.843096	0.150577	0.222832	not	32.2898	29.1 - 36.2	1.47192	0.89495	0.355542	0.448972	not	32.9729	32.2 - 33.4	1.50533	0.809251	0.0858968	0.207641	not	not
YJL136W-A	YJL136W-A	22.1115	19.7 - 25.1	25.3404	15.4 - 40.2	1.11943	0.959697	0.75639	0.808875	not	32.6328	24.1 - 45.3	1.46151	0.888622	0.311227	0.404386	not	38.3191	23.9 - 55.4	1.71552	0.922246	0.459104	0.610269	not	not
YHR096C	HXT5	22.1228	22.1 - 22.1	23.5587	18.7 - 29.9	1.06613	0.914003	0.203246	0.283352	not	45.265	36.5 - 53.8	2.0382	1.23926	0.032665	0.0691441	not	55.868	41.8 - 75.5	2.52008	1.35477	0.00639803	0.0592486	not	not
YBR076W	ECM8	22.3177	17.8 - 27.1	19.334	17.1 - 21.3	0.876001	0.751005	0.00517305	0.0203327	not	22.8206	18.6 - 27.6	1.0339	0.628627	0.000519825	0.00697722	repressed	37.6035	19.4 - 72.6	1.65719	0.89089	0.487169	0.634307	not	not
YJL045W	YJL045W	22.3387	16.9 - 28	22.3089	21.8 - 22.7	1.01156	0.867222	0.0965805	0.157288	not	26.0568	24.7 - 27.2	1.17999	0.717451	0.0095095	0.0291996	not	38.2419	32.8 - 45.4	1.73369	0.932017	0.397	0.552747	not	not
YIL057C	RGI2	22.3585	19.5 - 25	17.8311	12.3 - 25.4	0.799148	0.685118	0.0105202	0.0313169	not	26.1217	19.2 - 36.2	1.16092	0.705862	0.0315471	0.0673831	not	29.4278	27.7 - 31.2	1.32587	0.712776	0.00165624	0.0360325	not	not
YIL073C	SPO22	22.3955	17.1 - 30	20.7479	16.4 - 25.4	0.919704	0.788472	0.0471421	0.0907233	not	29.0169	24.5 - 34.5	1.28998	0.784328	0.0520815	0.0981257	not	41.0181	33.7 - 49	1.82726	0.982319	0.841079	0.905181	not	not
YHR022C-A	YHR022C-A	22.4546	19.1 - 25.6	22.1768	16 - 30.1	0.994879	0.85292	0.113706	0.178051	not	34.4684	NA	1.5484	0.941451	0.39617	0.488522	not	38.8944	37.5 - 40	1.749	0.940243	0.354604	0.513783	not	not
YJR114W	YJR114W	22.4914	19.6 - 27	26.1825	21.6 - 32.2	1.16418	0.998061	0.975659	0.981909	not	34.8182	31.6 - 38.4	1.54788	0.941136	0.342717	0.436677	not	43.2189	39.3 - 47.4	1.92035	1.03236	0.621633	0.743646	not	not
YGR249W	MGA1	22.504	20.1 - 25.4	25.8252	23.8 - 27.5	1.14501	0.981628	0.758312	0.810624	not	30.8664	24.5 - 38.1	1.36994	0.832944	0.0250466	0.0568555	not	34.7733	25.3 - 47.6	1.53872	0.827201	0.0538289	0.158087	not	not
YLR081W	GAL2	22.5267	17.3 - 30.5	19.3994	17.3 - 21.9	0.858591	0.73608	0.00878648	0.028077	not	26.5649	20.4 - 33.8	1.17783	0.716142	0.00568663	0.0210909	not	36.1059	33 - 39.5	1.60217	0.861308	0.0933188	0.217924	not	not
YPR200C	ARR2	22.6119	9.71 - 52.4	22.6997	21.6 - 24.5	1.02695	0.880411	0.508304	0.591367	not	24.3442	23.2 - 25.5	1.09913	0.668287	0.0769514	0.132937	not	39.6289	13.5 - 105	1.68437	0.9055	0.734514	0.830384	not	not
YGR059W	SPR3	22.679	19.6 - 26	18.2764	13.8 - 24	0.799687	0.68558	0.00401653	0.0175019	not	26.0746	26 - 26	1.14853	0.698327	0.0020932	0.0118392	not	30.9745	25.4 - 38	1.36101	0.731667	0.00695122	0.0614314	not	not
YIL101C	XBP1	22.8667	20.6 - 25.8	23.9572	23.3 - 24.5	1.04722	0.897795	0.0841008	0.140649	not	29.9572	25.2 - 37.3	1.30432	0.793048	0.0356349	0.073532	not	59.2208	35.3 - 97.6	2.5434	1.36731	0.0490597	0.150315	not	not
YEL057C	YEL057C	22.8774	21.7 - 23.9	20.0963	17.3 - 22.9	0.877505	0.752294	0.00238822	0.0135057	not	30.5278	21.2 - 41.8	1.33192	0.809832	0.0214038	0.0507164	not	35.3815	29.8 - 41	1.54754	0.831942	0.0186442	0.0895176	not	not
YLR329W	REC102	22.8874	18.3 - 29	21.1333	18.9 - 24.1	0.923324	0.791576	0.0150833	0.0399464	not	31.2254	15.5 - 59.9	1.32162	0.803567	0.251522	0.341235	not	46.6662	41.6 - 51.6	2.03699	1.09507	0.236822	0.395706	not	not
YPL277C	YPL277C	22.9137	15.6 - 31.9	25.05	22.3 - 28.1	1.1174	0.957956	0.662646	0.728319	not	34.5951	25.9 - 46.6	1.53342	0.932345	0.580531	0.659599	not	49.5216	45.7 - 53	2.2084	1.18721	0.120905	0.25689	not	not
YLR031W	YLR031W	22.9194	21.2 - 24.1	23.1605	21.1 - 25.2	1.01228	0.867839	0.0461493	0.0891495	not	35.5519	27.3 - 47.5	1.55154	0.94336	0.49665	0.583275	not	55.1049	52.2 - 57.7	2.41469	1.29812	0.00259576	0.0431812	not	not
YOR190W	SPR1	22.9257	15.1 - 32.5	28.6539	24.2 - 32.6	1.27166	1.09021	0.456103	0.541763	not	41.3807	28.5 - 61.1	1.83604	1.11635	0.401439	0.493703	not	38.9715	32.3 - 48.2	1.73608	0.933298	0.532547	0.67082	not	not
YEL049W	PAU2	22.9494	19.6 - 26.4	32.9522	30.1 - 35.7	1.44039	1.23486	0.02803	0.0619156	not	45.6203	42.2 - 50.1	2.00464	1.21886	0.0150725	0.0398179	not	62.7962	54 - 72.5	2.75199	1.47944	0.00176835	0.0374096	not	not
YNR072W	HXT17	22.9573	16.8 - 29.1	20.0464	16.8 - 24.3	0.886374	0.759898	0.0174158	0.0438574	not	26.7035	15.8 - 47.4	1.1487	0.698427	0.0784007	0.134988	not	40.818	32.1 - 52.3	1.79795	0.966561	0.728631	0.826298	not	not
YMR322C	SNO4	23.0385	22.3 - 23.5	17.2781	12.3 - 26.1	0.747599	0.640924	0.00431864	0.0182421	repressed	27.0012	20.3 - 35.6	1.16381	0.707617	0.0169749	0.0430925	not	38.1025	36.9 - 39.3	1.65878	0.891743	0.0503376	0.152333	not	not
YJR108W	ABM1	23.0403	21.2 - 25.1	16.5025	15.7 - 17	0.716498	0.614261	7.89595e-05	0.00626999	repressed	24.0194	NA	1.04319	0.634278	0.000156147	0.0060363	repressed	32.2212	NA	1.39969	0.75246	0.0014361	0.0347118	not	not
YKL183C-A	YKL183C-A	23.0967	17.5 - 29.1	22.7885	16.4 - 31.9	0.997027	0.854762	0.159288	0.232919	not	25.9612	17.7 - 39.2	1.11995	0.680946	0.0347994	0.0723623	not	34.983	31.1 - 38.8	1.53434	0.824845	0.0437784	0.140289	not	not
YLR415C	YLR415C	23.1046	14 - 36.1	20.7685	17 - 25.1	0.926697	0.794468	0.105726	0.168257	not	27.7952	18 - 42.8	1.21944	0.741438	0.122793	0.191591	not	41.5428	15.7 - 96.4	1.75681	0.944446	0.810002	0.884055	not	not
YMR105W-A	YMR105W-A	23.1609	22.1 - 24.1	20.4988	19.2 - 22.2	0.888462	0.761689	0.00229514	0.0133206	not	24.5193	19.7 - 30	1.05456	0.64119	0.00564877	0.0210194	repressed	35.425	31.4 - 40.5	1.53618	0.825834	0.0160947	0.0843379	not	not
YAL067C	SEO1	23.2386	16.1 - 30.9	24.7615	20 - 29.9	1.07883	0.924894	0.481984	0.565699	not	33.6999	30.3 - 36.7	1.4775	0.898346	0.302231	0.395791	not	42.2814	40.5 - 44.1	1.85556	0.997533	0.978408	0.985904	not	not
YIL072W	HOP1	23.2573	21.6 - 25	20.5366	18 - 23.3	0.88831	0.761557	0.00260615	0.0141125	not	36.0681	34.8 - 37.1	1.56014	0.948593	0.3425	0.436498	not	41.2405	37.5 - 44.5	1.7838	0.958952	0.435711	0.587597	not	not
YPL152W-A	YPL152W-A	23.2628	19.7 - 29	18.4765	12.8 - 27.2	0.789193	0.676584	0.0105109	0.0313108	not	29.2103	16.8 - 46.4	1.24372	0.756204	0.0307583	0.0660224	not	39.7277	31.6 - 49.7	1.70196	0.914955	0.29347	0.452774	not	not
YLR312C	YLR312C	23.2628	19.7 - 28.1	26.645	26.2 - 27.5	1.14452	0.981209	0.752018	0.805101	not	48.8136	42.6 - 55.9	2.09034	1.27096	0.0210033	0.0499976	not	57.511	45 - 73.3	2.45853	1.32168	0.018145	0.0882445	not	not
YKL178C	STE3	23.2672	20.5 - 27.1	22.6948	20.6 - 25.2	0.97605	0.836778	0.0143043	0.0384459	not	28.7029	26.3 - 31.3	1.23443	0.750556	0.00195491	0.0114539	not	33.6016	28.2 - 40.1	1.44183	0.775112	0.00803137	0.0647587	not	not
YLR406C-A	YLR406C-A	23.2834	22.9 - 23.7	27.4671	17.4 - 39.1	1.16086	0.995216	0.967124	0.97575	not	32.0052	26.5 - 38.1	1.37813	0.837929	0.0133087	0.0367909	not	51.3531	25.5 - 98.1	2.15434	1.15815	0.357541	0.516209	not	not
YHL024W	RIM4	23.3413	20.6 - 25.7	25.7142	22.7 - 29	1.10899	0.950745	0.368278	0.456894	not	42.4535	40.3 - 44.7	1.8286	1.11182	0.119888	0.188252	not	43.341	22.1 - 83	1.81983	0.978325	0.887783	0.934227	not	not
YCR045C	RRT12	23.3939	15.6 - 33.5	23.2602	19.3 - 27.2	1.01149	0.867158	0.245823	0.33002	not	25.6246	24.5 - 26.3	1.11901	0.680376	0.013481	0.0371221	not	40.015	31.3 - 51.3	1.74264	0.936824	0.585211	0.713968	not	not
YNL034W	YNL034W	23.4251	22.7 - 24	20.6452	16.4 - 25.4	0.88425	0.758077	0.00571721	0.0216183	not	33.5311	26 - 44.5	1.42821	0.868379	0.166824	0.245526	not	49.6571	44 - 56.8	2.12775	1.14386	0.0417297	0.136457	not	not
YJL219W	HXT9	23.49	19.2 - 28.3	26.0761	24.9 - 26.8	1.12018	0.960347	0.566056	0.645747	not	28.1366	19.6 - 38.5	1.20701	0.733882	0.00861113	0.0273929	not	49.5682	21.8 - 96.2	2.05747	1.10607	0.585694	0.714095	not	not
YLR307W	CDA1	23.5952	16.2 - 31.9	18.7357	17.5 - 20.3	0.808623	0.693241	0.0104469	0.0312137	not	30.2613	17.2 - 50.7	1.29194	0.785522	0.121059	0.189513	not	51.2622	43.2 - 61	2.21367	1.19005	0.135567	0.276359	not	not
YGR236C	SPG1	23.7092	19.7 - 28.6	18.5414	17 - 20.2	0.780169	0.668847	0.000981661	0.00978889	not	30.4951	18.9 - 45.7	1.27494	0.775186	0.0395393	0.079331	not	37.7805	35.9 - 40.4	1.59343	0.856613	0.042584	0.137947	not	not
YIR019C	MUC1	23.7298	16.8 - 33.6	34.9825	17.2 - 70.6	1.4514	1.2443	0.198338	0.277584	not	40.4823	36.1 - 47.1	1.70645	1.03755	0.679917	0.748297	not	47.277	31.8 - 70.5	1.97781	1.06325	0.601352	0.727851	not	not
YHR214C-E	YHR214C-E	23.7795	20 - 27.3	23.9641	20.1 - 28.9	1.01616	0.871165	0.0825176	0.138739	not	25.7139	21.2 - 30.8	1.08313	0.658563	0.00586842	0.0214902	repressed	32.7485	28 - 38.4	1.38656	0.745398	0.00570139	0.0568731	not	not
YOL155W-A	YOL155W-A	23.7795	20.4 - 27.3	25.1425	16.6 - 34.1	1.04879	0.899137	0.370803	0.45922	not	31.9773	30.5 - 33.5	1.35589	0.824405	0.0233744	0.0541161	not	62.2263	56.8 - 67.8	2.63939	1.41891	0.00109759	0.0322848	not	not
YDR523C	SPS1	23.8803	20.6 - 27.7	24.3292	21 - 28.1	1.01509	0.870251	0.0718472	0.125036	not	35.1191	14.9 - 69.4	1.41655	0.861288	0.412835	0.503991	not	41.4696	24.5 - 63.7	1.71072	0.919664	0.505584	0.649463	not	not
YML066C	SMA2	23.8984	23.3 - 24.9	29.2201	20.8 - 44.6	1.22285	1.04836	0.54742	0.628289	not	28.6224	22.3 - 36.4	1.19903	0.729027	0.00136363	0.00980008	not	42.2694	31 - 57	1.76437	0.948508	0.513573	0.656074	not	not
YER054C	GIP2	24.0313	20.3 - 27.9	20.5452	16.5 - 25.5	0.857644	0.735267	0.00968744	0.029746	not	31.73	31.7 - 31.7	1.33314	0.810572	0.0184756	0.0456733	not	38.1099	35.5 - 42.5	1.60136	0.860877	0.0509124	0.153216	not	not
YJL038C	LOH1	24.0659	19.5 - 29.6	19.1403	13.1 - 29.4	0.790191	0.677439	0.0109251	0.0322004	not	23.5279	20.3 - 27	0.97772	0.59447	0.000188511	0.0060363	repressed	29.3451	27.7 - 30.9	1.21945	0.655563	0.000448208	0.0238843	repressed	not
YLR054C	OSW2	24.0852	24 - 24	33.428	26.9 - 40.3	1.37686	1.1804	0.10503	0.167559	not	32.5449	29.7 - 35.7	1.35419	0.823369	0.0164423	0.0421758	not	75.6793	58.3 - 99.6	3.14509	1.69077	0.000191135	0.0180177	induced	not
YMR175W	SIP18	24.105	18.9 - 28.8	22.217	16.3 - 30.5	0.930462	0.797695	0.0461477	0.0891495	not	32.3761	26.1 - 39.1	1.35775	0.825533	0.0375652	0.0765258	not	43.9205	39.4 - 48.5	1.84337	0.990976	0.898089	0.941014	not	not
YPL017C	IRC15	24.1052	18.2 - 32.3	24.8245	24.8 - 24.8	1.02913	0.882287	0.140269	0.210288	not	27.5342	22 - 34	1.13465	0.689886	0.0146396	0.0389654	not	31.1043	20.8 - 43.4	1.28105	0.688679	0.0118468	0.0751182	not	not
YLR156W	YLR156W	24.2343	19.4 - 28.7	40.4119	30 - 56.2	1.68564	1.44512	0.00231295	0.0133763	not	54.1176	52.1 - 57.4	2.25633	1.37189	0.00373826	0.0163112	not	50.1696	49.8 - 51.1	2.09298	1.12517	0.11452	0.248171	not	not
YFL051C	YFL051C	24.3241	21.3 - 27.8	19.4047	14.5 - 26.7	0.796177	0.682571	0.00347785	0.0163727	not	28.4826	17 - 47.5	1.14367	0.695373	0.0525012	0.098588	not	37.4569	32.9 - 43.8	1.53975	0.827752	0.0161265	0.0843379	not	not
YBR147W	RTC2	24.5234	23.4 - 24.9	22.2056	11.5 - 37.4	0.880966	0.755262	0.10406	0.166354	not	31.9773	30.7 - 33.1	1.30956	0.796232	0.00637557	0.0226367	not	40.5775	36.7 - 43.8	1.66201	0.893478	0.0649015	0.174968	not	not
YDR256C	CTA1	24.5234	23.5 - 24.9	25.9088	19.1 - 32.3	1.05	0.900177	0.267973	0.352478	not	34.8436	31.7 - 38.2	1.42606	0.86707	0.0540729	0.100891	not	32.7904	23.4 - 47.6	1.33056	0.715295	0.0143202	0.0807527	not	not
YER106W	MAM1	24.5234	23.3 - 25.2	21.5278	20.8 - 21.9	0.881136	0.755407	0.00128964	0.0104984	not	30.8992	28.1 - 33.1	1.26594	0.769712	0.00206714	0.0117672	not	44.6123	34.9 - 55.8	1.82278	0.979911	0.766187	0.853561	not	not
YPR001W	CIT3	24.5703	12.7 - 42.1	22.7371	22.2 - 23.2	0.961956	0.824695	0.205199	0.285441	not	32.615	30.4 - 35.3	1.37982	0.838956	0.254546	0.344511	not	40.6692	25.4 - 62.7	1.69664	0.912098	0.604278	0.730454	not	not
YBR090C	YBR090C	24.5984	21.6 - 27.3	23.7094	15.1 - 39.1	0.965537	0.827766	0.122563	0.188734	not	29.6121	21.5 - 41	1.2005	0.729922	0.0337938	0.0708704	not	42.0491	30.1 - 57.3	1.71325	0.921024	0.382388	0.538006	not	not
YPR027C	YPR027C	24.5984	21.5 - 27.5	18.8018	15.1 - 23.5	0.765942	0.65665	0.00194482	0.0121144	repressed	26.9453	23.7 - 30.6	1.10487	0.671777	0.000631965	0.00751993	not	41.1091	32.8 - 52.2	1.67846	0.902326	0.238399	0.397161	not	not
YGR204C-A	YGR204C-A	24.8547	17.5 - 33.3	27.4401	14.7 - 51.9	1.10794	0.949846	0.749245	0.802753	not	25.4782	19.3 - 34.4	1.03406	0.628724	0.0133687	0.0369025	repressed	39.5747	31.6 - 50.1	1.61755	0.86958	0.220612	0.379131	not	not
YOL084W	PHM7	24.9017	20 - 30.6	30.9487	20.1 - 43.3	1.21678	1.04316	0.742553	0.796941	not	40.4416	38.8 - 41.8	1.62309	0.986864	0.837829	0.871416	not	35.3815	30.2 - 41.4	1.4188	0.762735	0.00792756	0.0645151	not	not
YER039C-A	YER039C-A	24.9195	24.3 - 25.1	18.683	18.7 - 18.7	0.751384	0.64417	0.000104793	0.00626999	repressed	29.4246	13.9 - 58.3	1.13688	0.691243	0.0966898	0.159115	not	41.5387	24.2 - 70.6	1.64015	0.881729	0.361335	0.519632	not	not
YGL240W	DOC1	24.9488	24.3 - 25.5	21.8387	21.5 - 22.2	0.878761	0.753371	0.00115194	0.0101486	not	32.0687	21.2 - 48.8	1.27184	0.773303	0.0814489	0.139051	not	34.0314	27.2 - 41.9	1.36632	0.73452	0.00413598	0.0512948	not	not
YDR009W	GAL3	24.9501	14.1 - 44.7	25.3401	21.7 - 29.3	1.0193	0.873861	0.362626	0.451367	not	55.1097	18.2 - 125	2.08799	1.26953	0.376561	0.470161	not	54.5931	51 - 57.4	2.206	1.18592	0.236393	0.395488	not	not
YOR100C	CRC1	25.0182	15.3 - 36.4	20.4882	17.5 - 23.5	0.837266	0.717798	0.0291355	0.0636255	not	33.2673	23.4 - 45.7	1.35827	0.825853	0.167619	0.246504	not	36.8616	35.6 - 38.6	1.51345	0.813614	0.0999032	0.22802	not	not
YDR437W	GPI19	25.0355	17.7 - 32.8	18.2316	16.7 - 19.4	0.739569	0.634041	0.00238996	0.0135057	repressed	33.1035	29.2 - 37.1	1.34575	0.818239	0.0568714	0.104674	not	44.5272	NA	1.80985	0.972956	0.755633	0.846126	not	not
YBR284W	YBR284W	25.3236	21.8 - 29.6	29.1842	23.6 - 35.1	1.14387	0.980653	0.811795	0.853612	not	45.3243	31.7 - 60.3	1.77283	1.07791	0.463339	0.55218	not	53.8644	40.4 - 71.7	2.11811	1.13867	0.151952	0.297692	not	not
YPR054W	SMK1	25.3488	19.4 - 32.7	29.8221	22 - 39.2	1.15857	0.993252	0.953254	0.966064	not	32.6951	25.9 - 43.4	1.28136	0.779091	0.0506854	0.0961168	not	32.8931	19.9 - 54.4	1.27745	0.686747	0.0259501	0.104913	not	not
YLR149C	YLR149C	25.3522	16.5 - 36.5	22.8698	16.9 - 29.3	0.915128	0.784549	0.0831087	0.139567	not	37.8612	37 - 38.8	1.52835	0.929264	0.479255	0.56756	not	54.0375	54 - 54	2.18113	1.17256	0.150896	0.296343	not	not
YIR013C	GAT4	25.3743	24.6 - 25.9	28.8659	17.2 - 51	1.13257	0.970962	0.795338	0.841458	not	40.9348	25.8 - 68.2	1.59996	0.972804	0.816305	0.856749	not	36.2595	21.2 - 60.7	1.41021	0.758113	0.0681765	0.180192	not	not
YJR095W	SFC1	25.443	11.4 - 47.3	19.0243	11.6 - 28.8	0.780646	0.669256	0.0902327	0.149009	not	31.104	20.7 - 44.1	1.29063	0.784723	0.232569	0.320285	not	38.326	35.9 - 41.2	1.59925	0.85974	0.410311	0.563946	not	not
YPL054W	LEE1	25.5514	22.1 - 29.7	25.5047	19.7 - 33.8	0.998192	0.855761	0.0498127	0.0945755	not	36.9854	22.9 - 51.4	1.43136	0.870292	0.220674	0.307043	not	57.5185	42.1 - 75.4	2.23925	1.2038	0.0652239	0.175753	not	not
YLL005C	SPO75	25.5615	23.6 - 27	37.853	36.8 - 38.6	1.48399	1.27224	0.00914219	0.0287108	not	28.3337	22.3 - 37	1.10643	0.672727	0.00739593	0.0248257	not	58.8068	58 - 59.3	2.31395	1.24396	0.00650374	0.0594904	not	not
YBR152W	SPP381	25.7922	19.5 - 33.4	25.14	20.1 - 31.2	0.974608	0.835542	0.047887	0.0917821	not	32.6497	NA	1.2572	0.7644	0.0305363	0.0656455	not	64.2619	62.1 - 67.2	2.49159	1.33945	0.00515803	0.0552753	not	not
YNL279W	PRM1	25.8136	19.2 - 34.9	34.9989	33.1 - 37.6	1.3534	1.16028	0.105778	0.168292	not	54.0818	33.3 - 87	2.05175	1.2475	0.168764	0.247865	not	49.0964	35.2 - 69.9	1.88818	1.01507	0.891556	0.936238	not	not
YNL128W	TEP1	25.8878	21.4 - 30.9	28.0787	17.1 - 46.3	1.07837	0.9245	0.460008	0.545337	not	36.9673	35.2 - 38.8	1.42823	0.868386	0.0464083	0.0896773	not	54.2912	40.8 - 70.6	2.08506	1.12091	0.227177	0.384991	not	not
YBR294W	SUL1	26.2641	20.2 - 35	26.6518	18.3 - 39.2	1.01111	0.866839	0.202496	0.282376	not	28.8626	19.6 - 40.1	1.09474	0.665623	0.00398866	0.0169241	repressed	50.5716	42.2 - 59	1.92119	1.03281	0.706276	0.809954	not	not
YOR178C	GAC1	26.2803	21.6 - 31.2	18.4707	16.4 - 20.9	0.711409	0.609899	0.00052964	0.00768114	repressed	36.7959	20.7 - 56.9	1.39462	0.847952	0.229284	0.316686	not	50.7453	27.1 - 87.2	1.8984	1.02056	0.901911	0.942864	not	not
YER044C-A	MEI4	26.2964	17.4 - 37.1	20.575	15.9 - 25.8	0.776271	0.665505	0.00934105	0.0290771	repressed	23.9174	21.1 - 26.4	0.910196	0.553414	0.00062653	0.00750774	repressed	39.547	30.4 - 49.6	1.49924	0.805976	0.0723616	0.187352	not	not
YER187W	YER187W	26.3348	23.2 - 29.3	28.8659	16.6 - 50.4	1.09537	0.939069	0.598283	0.673813	not	38.2127	23.5 - 56.9	1.44263	0.877146	0.285662	0.377854	not	51.604	39.9 - 66.4	1.96533	1.05654	0.532048	0.670659	not	not
YCR100C	YCR100C	26.5311	25.9 - 27.1	38.729	37.4 - 39.6	1.45766	1.24967	0.0172242	0.0435104	not	46.2461	33.8 - 60.2	1.74573	1.06143	0.432554	0.523209	not	63.8584	41.7 - 93.5	2.38414	1.28169	0.0658382	0.176987	not	not
YNL270C	ALP1	26.657	19.3 - 37.7	22.5626	13.9 - 37.7	0.839301	0.719542	0.0450591	0.087911	not	31.276	26.8 - 37	1.17089	0.711924	0.0139971	0.0379156	not	42.3786	27.7 - 63.1	1.57306	0.845661	0.214296	0.371343	not	not
YEL076C-A	YEL076C-A	26.6884	25.8 - 27.2	36.1459	34.1 - 38.7	1.35577	1.16232	0.0229586	0.05357	not	60.0304	45.2 - 81.4	2.25118	1.36876	0.003543	0.0157914	not	38.5092	NA	1.4135	0.759884	0.0937486	0.218566	not	not
YJR079W	YJR079W	26.7066	22.4 - 31.5	20.7555	16.3 - 26.5	0.776269	0.665504	0.00180409	0.0117018	repressed	23.2486	16.9 - 30.1	0.869818	0.528864	6.41563e-05	0.0060363	repressed	36.3257	35.6 - 37	1.36048	0.731383	0.00150134	0.0353816	not	not
YMR306W	FKS3	26.7184	19.7 - 36.8	46.4815	36.7 - 57.8	1.71574	1.47092	0.0162673	0.0419552	not	50.8505	33.1 - 78.7	1.88944	1.14881	0.258361	0.348757	not	62.9361	16.4 - 203	2.16314	1.16288	0.58632	0.714396	not	not
YOL015W	IRC10	26.7184	19.5 - 36.6	33.3142	31.3 - 35.9	1.24567	1.06793	0.421078	0.50893	not	48.5123	32.3 - 75.3	1.80557	1.09782	0.407027	0.498839	not	53.9047	36.4 - 80.3	2.00048	1.07544	0.532796	0.67082	not	not
YBL074C	AAR2	26.841	22.2 - 30.9	22.0775	17.1 - 27.5	0.824071	0.706485	0.00907569	0.0286443	not	30.3863	28.9 - 32	1.14298	0.694949	0.00289208	0.0141442	not	47.277	31.2 - 70.2	1.76609	0.949432	0.618408	0.741909	not	not
YDL218W	YDL218W	26.9223	26.1 - 27.9	27.2828	17.3 - 42.5	1.01077	0.866548	0.161595	0.235867	not	39.3254	37.5 - 42.3	1.46418	0.890244	0.0528776	0.0991631	not	49.2839	36.4 - 64.6	1.82577	0.981513	0.813954	0.886395	not	not
YDR182W-A	YDR182W-A	26.9686	20 - 34.2	23.5247	22.2 - 25.1	0.886297	0.759832	0.0140691	0.0379652	not	39.5779	16.3 - 105	1.41425	0.859887	0.516975	0.601191	not	59.2018	56.2 - 61.2	2.2297	1.19866	0.0677605	0.179762	not	not
YNR062C	YNR062C	27.0741	25.8 - 28	27.3753	22.3 - 33.9	1.01558	0.870667	0.0591691	0.107851	not	32.432	19.5 - 57.1	1.17845	0.71652	0.0565763	0.104267	not	32.213	23.3 - 43.3	1.18884	0.63911	0.00154389	0.0356419	repressed	not
YGL041C-B	YGL041C-B	27.1566	20.7 - 35.6	28.5809	24.7 - 33.1	1.05248	0.902304	0.18547	0.263639	not	39.7838	38.6 - 40.4	1.46474	0.890588	0.145168	0.218602	not	40.6978	40.7 - 40.7	1.49853	0.805595	0.0201399	0.0929888	not	not
YBR240C	THI2	27.1772	26.2 - 27.4	30.7431	25.5 - 37.3	1.12525	0.964688	0.673831	0.738745	not	53.321	51.1 - 54.2	1.96807	1.19662	0.0175911	0.0441328	not	57.3003	49.6 - 64.9	2.11244	1.13563	0.0892626	0.212657	not	not
YDR536W	STL1	27.1997	20.8 - 34.9	23.0373	19.2 - 27	0.855743	0.733638	0.0152201	0.0402267	not	32.2481	25.4 - 40.4	1.20224	0.73098	0.0108155	0.0319019	not	50.9997	41.6 - 61	1.89918	1.02098	0.822955	0.891863	not	not
YIL099W	SGA1	27.2536	23.9 - 30.4	39.7712	29.9 - 53.2	1.4714	1.26145	0.00840371	0.0273012	not	46.787	30.7 - 67.2	1.70668	1.03769	0.750331	0.804899	not	52.0539	30.8 - 88.5	1.89698	1.0198	0.874274	0.9274	not	not
YER188C-A	YER188C-A	27.3166	17 - 43.2	33.486	21.2 - 53.8	1.22543	1.05058	0.700359	0.762294	not	47.4499	33.5 - 68.1	1.72248	1.0473	0.741401	0.797218	not	94.8621	65.7 - 133	3.46405	1.86224	0.00243559	0.0423263	induced	not
YMR280C	CAT8	27.3646	22.2 - 32.6	44.6091	37.4 - 53.3	1.6306	1.39793	0.0220463	0.052086	not	92.0358	75.7 - 112	3.38839	2.0602	0.000324246	0.00615415	induced	73.5762	66.4 - 82.4	2.72045	1.46248	0.00298345	0.0462512	not	not
YJR053W	BFA1	27.5097	19.5 - 37.1	27.1798	20.4 - 36.7	1.00622	0.862647	0.183964	0.261827	not	44.6932	34.3 - 57.8	1.65323	1.00519	0.959401	0.968196	not	47.5745	47 - 48.3	1.76311	0.947832	0.558192	0.692437	not	not
YOR339C	UBC11	27.5097	19.9 - 36.5	22.6997	21.7 - 24.1	0.84101	0.721007	0.0105564	0.0314083	not	33.111	28.6 - 38.1	1.22623	0.745568	0.0182729	0.0453694	not	43.0173	29.8 - 60.4	1.58026	0.849534	0.213316	0.37037	not	not
YGL146C	RRT6	27.6003	24 - 30.9	29.5858	27.8 - 31.3	1.07207	0.919101	0.133298	0.202019	not	39.2298	32.5 - 48.7	1.41986	0.863298	0.0714517	0.125468	not	44.1589	37.3 - 50.9	1.59852	0.85935	0.0464608	0.145425	not	not
YMR085W	YMR085W	27.6114	22.1 - 34.7	50.9481	43.4 - 59.4	1.8273	1.56656	0.00315432	0.0155272	induced	92.512	86.1 - 98.5	3.34604	2.03445	6.34799e-05	0.0060363	induced	60.3264	NA	2.18165	1.17283	0.0594076	0.166472	not	not
YDR403W	DIT1	27.6114	21.9 - 34.4	23.5512	22.7 - 23.9	0.851368	0.729887	0.00305191	0.0154001	not	31.002	22.5 - 40.5	1.11987	0.680901	0.0022095	0.0121118	not	59.3627	21.9 - 143	2.01519	1.08335	0.733431	0.829823	not	not
YGR224W	AZR1	27.6228	22.7 - 33	17.9187	14.9 - 21.9	0.656111	0.562491	0.000381142	0.00716439	repressed	26.0674	24.8 - 27.3	0.954436	0.580313	0.000393872	0.00652961	repressed	33.6712	32.6 - 35	1.23341	0.66307	0.00101071	0.031964	repressed	not
YOR032W-A	YOR032W-A	27.9058	21.5 - 35.3	36.753	29.7 - 46.4	1.33829	1.14733	0.13119	0.199251	not	45.2857	39 - 52.3	1.64897	1.0026	0.97519	0.980913	not	59.2208	36.3 - 98.6	2.11691	1.13803	0.386391	0.54202	not	not
YFR032C-B	YFR032C-B	28.0685	18.9 - 39.8	30.1003	26.8 - 33.3	1.09685	0.940341	0.543326	0.624308	not	32.8233	23.1 - 46.2	1.18313	0.719362	0.0540952	0.100891	not	71.1952	69.3 - 72.1	2.59417	1.3946	0.0144642	0.0810866	not	not
YMR118C	YMR118C	28.0739	23.2 - 33.6	21.2939	18.1 - 25	0.763706	0.654734	0.00213169	0.0128215	repressed	28.6341	27.9 - 29.2	1.0313	0.627049	0.00091435	0.00826129	repressed	39.8718	39.4 - 40.4	1.43673	0.772372	0.00927893	0.0682446	not	not
YLR377C	FBP1	28.207	25.2 - 30.9	30.1214	23.4 - 39.2	1.0765	0.922893	0.2308	0.313272	not	35.6696	23.6 - 53.7	1.26411	0.768599	0.0437879	0.0857267	not	45.4748	33.5 - 60.1	1.61854	0.870114	0.128637	0.267274	not	not
YBR018C	GAL7	28.2213	26.4 - 29.7	29.5059	19 - 43.4	1.02844	0.881696	0.341353	0.430574	not	35.0086	34.4 - 35.8	1.24776	0.758661	0.00217249	0.0120822	not	38.5986	33.3 - 43.6	1.37291	0.73806	0.00315021	0.0468884	not	not
YER096W	SHC1	28.3184	22.1 - 34.1	43.6527	21.4 - 77.4	1.48961	1.27706	0.235046	0.317931	not	60.1166	34.6 - 101	2.09044	1.27103	0.175983	0.256734	not	76.2559	56.1 - 104	2.69945	1.4512	0.0163264	0.0846134	not	not
YDR124W	YDR124W	28.4645	20 - 37.2	25.2853	10.9 - 52.4	0.851254	0.72979	0.197872	0.277089	not	37.4569	26.7 - 53.7	1.33296	0.810461	0.118111	0.185824	not	51.058	49.4 - 52	1.8285	0.982981	0.848261	0.909529	not	not
YIL046W-A	YIL046W-A	28.4789	24.1 - 32.8	26.4511	20.6 - 34.6	0.936895	0.803211	0.0230246	0.0536797	not	28.7472	25.5 - 32.9	1.01603	0.617763	0.00116751	0.00905821	repressed	46.934	44.8 - 49.2	1.66325	0.894145	0.11259	0.245494	not	not
YDL214C	PRR2	28.5719	24.7 - 32.2	51.8913	40.2 - 64.7	1.81765	1.55829	0.000209605	0.00626999	induced	60.9627	49.8 - 75.6	2.12054	1.28932	0.0236112	0.0543971	not	63.4612	60.5 - 66.5	2.2213	1.19415	0.0178517	0.0875488	not	not
YKR005C	YKR005C	28.8613	25.6 - 32.4	42.7627	40.1 - 45.2	1.47858	1.2676	0.00659794	0.0235148	not	54.3848	53.6 - 55.2	1.88461	1.14587	0.0455079	0.0882086	not	60.41	38.4 - 91.7	2.06581	1.11056	0.381506	0.537033	not	not
YOL104C	NDJ1	28.8945	22 - 38.5	43.7414	36.8 - 51.3	1.53675	1.31747	0.0135068	0.0368693	not	49.4167	47.8 - 50.2	1.73622	1.05565	0.525886	0.608541	not	36.893	21 - 60.2	1.2773	0.686662	0.0291247	0.110631	not	not
YBR148W	YSW1	28.9021	28.6 - 29	19.5728	15.8 - 23.8	0.679423	0.582477	0.000158606	0.00626999	repressed	30.8057	30.5 - 31	1.06967	0.650376	0.000253469	0.0060363	repressed	45.2969	28.6 - 70.5	1.54954	0.833019	0.160334	0.307615	not	not
YLR047C	FRE8	28.9088	20.6 - 39.8	36.2737	31.8 - 42.2	1.25505	1.07597	0.398857	0.486928	not	59.3758	50 - 68.9	2.05505	1.24951	0.0389886	0.0784209	not	71.3572	43.4 - 108	2.42268	1.30241	0.114043	0.247515	not	not
YHR022C	YHR022C	28.9985	23.3 - 35.1	34.2549	29.1 - 38.9	1.1725	1.0052	0.952924	0.965903	not	33.1564	17.4 - 54.8	1.1205	0.681283	0.0291726	0.0632912	not	47.0448	45.8 - 48.3	1.62214	0.872045	0.0756401	0.191893	not	not
YKR104W	YKR104W	29.0244	24.8 - 33.1	38.9677	32.6 - 46.8	1.35405	1.16084	0.0440364	0.0864525	not	60.8602	60.8 - 60.8	2.11502	1.28597	0.00720598	0.0244762	not	57.0954	52.4 - 63.8	1.98507	1.06716	0.314613	0.473006	not	not
YIR027C	DAL1	29.0678	25.6 - 33.2	28.3442	26.3 - 30.7	0.971629	0.832988	0.0286956	0.0629078	not	25.7568	21.1 - 31.3	0.886642	0.539093	3.18489e-05	0.0060363	repressed	48.6328	46.1 - 51.4	1.67414	0.900003	0.0837236	0.204568	not	not
YMR030W-A	YMR030W-A	29.1111	25.7 - 33.5	31.2836	19.1 - 48.8	1.04713	0.897718	0.448126	0.534613	not	39.5821	28.4 - 56.7	1.3516	0.821797	0.0782964	0.13489	not	50.5763	44 - 59.7	1.73731	0.933962	0.265587	0.423166	not	not
YHL048C-A	YHL048C-A	29.1887	19.3 - 43.9	15.0019	14.3 - 15.5	0.514979	0.441497	0.000209544	0.00626999	repressed	17.0114	10.4 - 28.1	0.56386	0.342837	0.00177746	0.0110234	repressed	30.3754	18 - 48.2	1.03055	0.554012	0.0046179	0.0526277	not	not
YCR099C	YCR099C	29.1953	26.1 - 32	52.8423	40.8 - 67	1.79796	1.54141	0.00655916	0.0234356	induced	54.0818	NA	1.82813	1.11153	0.451101	0.540671	not	63.3353	37.2 - 98.9	2.14769	1.15457	0.296435	0.455855	not	not
YPR116W	RRG8	29.3069	23.4 - 35.9	31.7318	23.7 - 43.5	1.09629	0.939865	0.453792	0.53998	not	44.9329	29.7 - 69	1.5409	0.936896	0.567305	0.647695	not	63.3509	60.9 - 66.1	2.18977	1.1772	0.0572335	0.16269	not	not
YNR071C	YNR071C	29.3314	24.9 - 34.2	28.275	16.1 - 43.5	0.947151	0.812003	0.190539	0.269556	not	34.3522	16.6 - 61.6	1.15419	0.701769	0.0504025	0.0957918	not	62.8723	40.3 - 91.8	2.13507	1.14779	0.283696	0.441669	not	not
YGR045C	YGR045C	29.3847	12.6 - 57.1	28.1391	21.6 - 37.6	1.00988	0.865784	0.426664	0.514441	not	40.4823	35.6 - 47	1.45388	0.883985	0.480966	0.56899	not	39.547	30.7 - 50.3	1.41522	0.76081	0.158742	0.305937	not	not
YML118W	NGL3	29.579	25.4 - 34	36.7452	35.1 - 38.2	1.23581	1.05948	0.435888	0.523103	not	60.1493	30.8 - 110	1.96498	1.19474	0.317115	0.410154	not	51.1904	NA	1.73117	0.930662	0.221107	0.379412	not	not
YBR196C-A	YBR196C-A	29.6601	27.7 - 31	41.5203	38.3 - 43.7	1.39675	1.19745	0.0616385	0.111063	not	46.6685	38.8 - 54.5	1.57363	0.956795	0.590388	0.668635	not	60.0309	50.2 - 70.7	2.0333	1.09308	0.181682	0.333093	not	not
YMR279C	YMR279C	29.6601	28.2 - 30.9	22.3523	19.6 - 24.9	0.755674	0.647848	0.000413064	0.00723738	repressed	29.8894	27 - 33.7	1.01158	0.615059	0.000511467	0.00695399	repressed	47.4758	44.6 - 50.4	1.60959	0.865301	0.0326427	0.118339	not	not
YBL049W	MOH1	29.6779	27.9 - 31.2	20.9507	16.3 - 26.6	0.703919	0.603477	0.000984631	0.00978889	repressed	33.2923	28.8 - 38.3	1.12587	0.684549	0.00189735	0.0113402	not	40.828	26.6 - 60.2	1.3685	0.73569	0.0245486	0.102249	not	not
YGL230C	YGL230C	29.7407	26.2 - 33.4	36.3162	24.3 - 56.4	1.22828	1.05302	0.535617	0.617373	not	40.2327	38.9 - 41.9	1.36366	0.82913	0.0172985	0.0436008	not	66.0943	61.3 - 71.2	2.24031	1.20437	0.016081	0.0843379	not	not
YIL166C	YIL166C	29.7691	18.3 - 46.1	39.8437	32.9 - 47	1.34208	1.15058	0.230312	0.31276	not	51.4284	50.7 - 51.8	1.73248	1.05338	0.640991	0.714374	not	54.1268	49.2 - 59	1.82224	0.979619	0.854221	0.913648	not	not
YPR194C	OPT2	29.8832	22.9 - 38.5	82.7267	69.6 - 99.2	2.81217	2.4109	5.60356e-05	0.00626999	induced	93.5625	55.2 - 156	3.14116	1.90988	0.0028183	0.0139287	induced	52.9106	46.7 - 61.6	1.79711	0.966106	0.684306	0.795894	not	not
YDL247W	MPH2	29.9706	28 - 31.9	25.1711	12.5 - 42	0.818746	0.70192	0.0538093	0.100312	not	35.5611	34.4 - 36.7	1.19383	0.725871	0.00148784	0.0101388	not	54.1267	45.9 - 66.3	1.81431	0.975354	0.703558	0.808231	not	not
YPL171C	OYE3	30.0983	25.1 - 36.1	41.5203	39.1 - 44.3	1.36862	1.17334	0.0991139	0.160168	not	76.664	56.8 - 106	2.54124	1.54512	0.00142492	0.00995225	induced	107.572	48.9 - 218	3.41963	1.83836	0.0184834	0.089119	not	not
YDR534C	FIT1	30.3303	24.4 - 36.9	38.4993	34.7 - 43.1	1.28342	1.10029	0.225071	0.307043	not	65.0931	43.2 - 91.7	2.16433	1.31595	0.0276191	0.0610449	not	46.6662	41.9 - 51.5	1.55685	0.836946	0.0518525	0.154682	not	reliable
YDR314C	RAD34	30.507	27.2 - 33.4	33.9072	23.6 - 46.7	1.08974	0.934244	0.581762	0.660202	not	47.5227	35.1 - 64.8	1.55504	0.945489	0.461881	0.550978	not	52.626	27.1 - 97.6	1.68751	0.907186	0.508307	0.652072	not	not
YHR189W	PTH1	30.6438	29.1 - 32.1	21.5724	19 - 24.2	0.703595	0.603199	0.000131571	0.00626999	repressed	24.3765	18.9 - 30.9	0.797168	0.484692	1.01623e-05	0.0060363	repressed	50.1696	49 - 51.3	1.64144	0.882424	0.0345133	0.122464	not	not
YJL052C-A	YJL052C-A	30.6856	21.9 - 42.7	23.4542	15.2 - 34	0.751776	0.644505	0.0132251	0.0363465	repressed	43.8869	33.6 - 54	1.42191	0.864548	0.197476	0.281838	not	64.3412	43.8 - 93.2	2.084	1.12034	0.318056	0.476536	not	not
YDR018C	YDR018C	30.7016	28.7 - 32.2	16.8292	15.9 - 17.3	0.550811	0.472216	9.74415e-06	0.00626999	repressed	34.3077	27.1 - 43.4	1.12097	0.681566	0.00116349	0.00905155	not	55.9027	37.2 - 82	1.81618	0.97636	0.804261	0.880431	not	not
YPL166W	ATG29	30.8286	25.8 - 36.4	20.702	15.3 - 28.9	0.662249	0.567753	0.00185726	0.0118831	repressed	29.9354	27.7 - 33.3	0.969057	0.589203	0.00051762	0.00697722	repressed	60.8435	53.5 - 68.8	1.97003	1.05907	0.428586	0.581175	not	not
YLR070C	XYL2	30.924	23.7 - 39	35.6321	16.8 - 72.6	1.14803	0.984221	0.921949	0.940405	not	48.9742	40.5 - 59.3	1.60763	0.977464	0.788372	0.835494	not	87.8056	68.7 - 113	2.86762	1.5416	0.00518337	0.05542	not	not
YNR056C	BIO5	31.1918	23.6 - 40.6	42.4941	19.6 - 83.3	1.29695	1.11189	0.593263	0.670295	not	69.6366	60.1 - 80.4	2.23225	1.35725	0.0067719	0.0234981	not	76.9469	45.7 - 130	2.42982	1.30625	0.0810508	0.200447	not	not
YOR177C	MPC54	31.2026	31.1 - 31.1	23.5512	22.7 - 24.5	0.756389	0.64846	0.00018032	0.00626999	repressed	39.801	36.6 - 44.1	1.28059	0.778621	0.00273652	0.0137266	not	75.8814	68.5 - 84.9	2.43797	1.31063	0.00333805	0.0483644	not	not
YKR102W	FLO10	31.2779	27.9 - 34.6	43.2388	18.9 - 89.5	1.309	1.12222	0.596049	0.672368	not	54.7814	46.2 - 62.2	1.75512	1.06714	0.447784	0.537382	not	61.1252	39.9 - 91.8	1.95077	1.04872	0.648982	0.766634	not	not
YKL095W	YJU2	31.5014	16.8 - 59.3	34.479	26.9 - 46.7	1.10196	0.944723	0.670253	0.73525	not	43.1795	NA	1.37366	0.835211	0.233472	0.321294	not	68.1501	35.2 - 127	2.11167	1.13521	0.535831	0.67363	not	not
YML007C-A	YML007C-A	31.535	23.6 - 41.2	38.5446	32.4 - 44.8	1.23094	1.0553	0.650026	0.718215	not	51.9156	44.6 - 62.5	1.67709	1.0197	0.827489	0.864317	not	71.571	53 - 93.7	2.29578	1.23419	0.105043	0.234925	not	not
YGR052W	FMP48	31.6767	18.8 - 52.2	33.9316	30.9 - 36.7	1.07031	0.917584	0.494652	0.578526	not	43.7973	41.9 - 45.8	1.38662	0.843089	0.184521	0.266509	not	59.565	54.4 - 65.4	1.88804	1.01499	0.896426	0.940321	not	not
YNL117W	MLS1	31.7263	27 - 38.3	25.8994	20.7 - 31.2	0.809475	0.693972	0.00558782	0.0213335	not	44.8072	24.9 - 80.1	1.39335	0.847183	0.219209	0.305607	not	52.5926	40.1 - 68.2	1.64902	0.886496	0.197758	0.351184	not	not
YMR272W-B	YMR272W-B	31.7473	21.9 - 43.3	27.3035	16.6 - 42.9	0.858859	0.736309	0.0817695	0.137727	not	27.0307	13.5 - 54.7	0.832315	0.506062	0.0184357	0.0456134	repressed	59.4622	25.9 - 125	1.83318	0.985501	0.943251	0.967057	not	not
YJL160C	YJL160C	31.8263	21.7 - 45.9	49.9921	44.1 - 56.7	1.57162	1.34737	0.0154372	0.0405738	not	48.3899	38.3 - 58.9	1.52116	0.924889	0.429518	0.520539	not	63.0313	61.2 - 65.3	1.98202	1.06552	0.496662	0.641205	not	not
YGR287C	IMA1	31.8426	28.1 - 35.8	32.7712	29.5 - 37	1.03646	0.888572	0.0707605	0.123411	not	67.3359	40.2 - 112	2.07331	1.26061	0.167363	0.246255	not	76.765	63.3 - 90.4	2.41888	1.30037	0.0152217	0.083022	not	not
YPL186C	UIP4	31.9998	24.7 - 40.5	29.7247	23.2 - 37.1	0.933824	0.800577	0.0749191	0.128797	not	51.1191	46.4 - 56.5	1.622	0.986202	0.861705	0.89054	not	73.5208	41 - 131	2.28792	1.22996	0.194397	0.347204	not	not
YDR246W-A	YDR246W-A	32.2895	23.6 - 42.3	39.1535	31.4 - 46.2	1.19632	1.02562	0.823281	0.862869	not	35.405	NA	1.0966	0.666752	0.00161073	0.0105739	not	52.9106	45.5 - 61.2	1.6374	0.880251	0.140094	0.282385	not	not
YIR017C	MET28	32.2895	24 - 44	34.9989	33.1 - 36.7	1.08177	0.927412	0.343515	0.432818	not	35.4687	NA	1.09644	0.666653	0.0034309	0.0156032	repressed	78.2296	NA	2.36605	1.27196	0.16004	0.30735	not	not
YPL077C	YPL077C	32.2981	NA	51.528	32.3 - 82	1.55122	1.32988	0.0982928	0.159433	not	82.0776	NA	2.53459	1.54107	0.00332047	0.0153354	induced	100.981	99.9 - 103	3.13858	1.68727	4.13085e-05	0.008215	induced	not
YCR007C	YCR007C	32.2981	31.7 - 32.4	32.7998	29.4 - 35.5	1.01424	0.86952	0.0711096	0.123887	not	48.6477	21.7 - 93.3	1.45339	0.883687	0.497703	0.584269	not	64.401	58.4 - 71.1	2.00159	1.07603	0.167988	0.317348	not	not
YPL036W	PMA2	32.4455	24.5 - 41.8	40.2502	35.6 - 44.4	1.25064	1.07219	0.521083	0.60345	not	44.7439	25 - 85.6	1.37781	0.837733	0.269605	0.360578	not	47.9926	47.7 - 48.6	1.50449	0.808798	0.0394926	0.131407	not	not
YMR244W	YMR244W	32.5763	26.9 - 39.5	25.1582	19.1 - 31.1	0.765108	0.655935	0.00358884	0.0166109	repressed	29.8959	26.3 - 33.9	0.917626	0.557932	9.43061e-05	0.0060363	repressed	36.2229	36.2 - 36.3	1.11205	0.597827	0.00014699	0.0173203	repressed	not
YPL192C	PRM3	32.7785	24.9 - 43.6	54.4471	49.7 - 58.7	1.65201	1.41629	0.00599409	0.0222897	not	63.1628	59.7 - 66.9	1.92688	1.17157	0.0599712	0.109207	not	81.7254	50.2 - 126	2.46855	1.32707	0.0417571	0.136457	not	not
YCR105W	ADH7	32.9681	20.9 - 52.6	37.9105	32.8 - 43.8	1.15143	0.987131	0.897839	0.920626	not	47.7021	32.3 - 70.7	1.44388	0.877904	0.30403	0.397284	not	48.496	24.3 - 89.3	1.43926	0.773734	0.16995	0.319347	not	not
YOR237W	HES1	33.011	32.4 - 33.6	28.7333	25.5 - 32.7	0.867552	0.743762	0.00495977	0.0198391	not	33.1663	21.2 - 50.7	0.999089	0.607463	0.0014152	0.00995225	repressed	45.5107	19.5 - 101	1.31864	0.708889	0.12109	0.2571	not	not
YOR348C	PUT4	33.0986	32.1 - 33.8	34.123	18.3 - 60.4	1.02652	0.880045	0.274101	0.358703	not	40.9028	37.6 - 45	1.24086	0.754463	0.00145568	0.0100231	not	55.5708	31.7 - 93	1.66033	0.892575	0.363043	0.520433	not	not
YFL064C	YFL064C	33.4685	21.5 - 48.5	32.3036	22.7 - 46.4	0.992464	0.85085	0.229618	0.312042	not	42.704	NA	1.28097	0.77885	0.216649	0.303083	not	42.9436	NA	1.31207	0.705355	0.0386434	0.130022	not	not
YNL146W	YNL146W	33.6489	NA	42.0585	29.7 - 55.9	1.2855	1.10207	0.620276	0.6932	not	81.6135	74.1 - 87.2	2.54058	1.54471	0.0343052	0.0715714	not	104.674	74.3 - 144	3.22902	1.73589	0.0213979	0.0955974	not	not
YOR389W	YOR389W	33.7507	18.5 - 61.6	38.9968	38.6 - 39.1	1.158	0.992769	0.95794	0.968903	not	35.6448	27 - 45.5	1.05972	0.644329	0.0181777	0.0451726	repressed	59.0773	40.2 - 90.4	1.74548	0.938353	0.686863	0.797393	not	not
YJL216C	IMA5	34.0274	27.3 - 42.6	38.1488	29.8 - 49.2	1.12126	0.96127	0.525548	0.607816	not	49.0328	41 - 57.5	1.43498	0.872493	0.127813	0.19795	not	50.702	45.5 - 55.6	1.48889	0.800414	0.0124367	0.0767331	not	not
YCL058C	FYV5	34.451	24.2 - 51	41.8145	24.6 - 67.8	1.17354	1.00609	0.971202	0.979689	not	37.4876	27.4 - 52.8	1.08184	0.657778	0.0089578	0.0282101	repressed	62.4964	40.2 - 90.5	1.79061	0.962615	0.76838	0.854472	not	not
YAL048C	GEM1	34.4876	21 - 53.7	35.3418	31 - 42	1.06125	0.909821	0.482736	0.566346	not	44.0684	NA	1.31611	0.800218	0.166186	0.244842	not	47.0129	41.6 - 53.2	1.41111	0.758596	0.0766854	0.193086	not	not
YGL184C	STR3	34.5579	28.3 - 43.4	31.2235	21.8 - 44.4	0.902581	0.773793	0.0138778	0.0375712	not	44.4769	26.9 - 74.8	1.26787	0.770887	0.0856525	0.144354	not	128.025	112 - 144	3.69171	1.98463	0.000137935	0.01696	induced	reliable
YBR299W	MAL32	34.5917	25.2 - 48.2	47.7532	41 - 54.4	1.36782	1.17264	0.153376	0.226087	not	47.1426	22.8 - 80.3	1.31876	0.801831	0.233837	0.321561	not	65.5412	62.5 - 68.8	1.89497	1.01872	0.802164	0.879349	not	not
YJR153W	PGU1	34.5963	34.5 - 34.5	47.2297	41.7 - 53.2	1.36891	1.17358	0.0135724	0.0369776	not	71.9926	49.5 - 101	2.0618	1.25361	0.0718624	0.12596	not	60.5037	49.4 - 73.5	1.7483	0.939869	0.405957	0.560342	not	not
YCL026C-A	FRM2	34.7753	27.7 - 40.5	43.9857	37.6 - 49.4	1.26578	1.08517	0.43801	0.524981	not	46.2571	24.6 - 75.3	1.31535	0.799755	0.165866	0.244498	not	74.8974	60.3 - 92.5	2.16828	1.16564	0.136398	0.277507	not	not
YAL063C-A	YAL063C-A	34.8251	16.8 - 72.2	39.5122	26 - 54.7	1.11987	0.960074	0.839945	0.875388	not	47.824	NA	1.39035	0.845358	0.309237	0.40245	not	76.6251	32.6 - 159	2.14642	1.15389	0.54464	0.681523	not	not
YOL141W	PPM2	35.1517	30.2 - 42.2	45.0087	26.7 - 72.4	1.2754	1.09341	0.359103	0.447671	not	51.0307	41.1 - 61.7	1.44059	0.875904	0.187937	0.270683	not	46.5076	46.5 - 46.6	1.32378	0.711651	0.000705602	0.0277848	not	not
YFR035C	YFR035C	35.1679	26.6 - 46.7	35.556	19.2 - 59.1	0.970098	0.831675	0.322655	0.4113	not	32.6024	27.1 - 38.8	0.924044	0.561834	0.000661548	0.00762578	repressed	59.0172	38.5 - 89.7	1.66143	0.893168	0.331052	0.489013	not	not
YPR015C	YPR015C	35.2191	25.1 - 51.7	29.4377	16.4 - 56	0.826777	0.708805	0.0461575	0.0891495	not	27.5342	22.3 - 34.3	0.776886	0.47236	0.000698931	0.00771295	repressed	36.0586	28.6 - 45.8	1.02176	0.549289	0.000732567	0.0281255	repressed	not
YOR298W	MUM3	35.2299	27.7 - 46.2	44.4294	31.5 - 61.2	1.26067	1.08079	0.307501	0.394919	not	58.9394	51.2 - 67	1.673	1.01721	0.794774	0.840898	not	67.1032	55.3 - 78.7	1.89823	1.02047	0.804144	0.880431	not	not
YBR203W	COS111	35.7626	31.8 - 41.1	31.1737	24.6 - 40.9	0.872689	0.748166	0.00193703	0.0120944	not	42.727	NA	1.17766	0.716036	0.0264825	0.0592505	not	115.735	86.7 - 144	3.21864	1.73031	0.00072467	0.0280735	induced	not
YNR064C	YNR064C	35.7984	35.1 - 36.8	21.9023	19.2 - 25.3	0.613973	0.526366	2.40778e-05	0.00626999	repressed	44.7837	27.6 - 72.9	1.23345	0.749957	0.0520704	0.0981257	not	46.5076	46.5 - 46.5	1.30375	0.700884	0.000304463	0.0209774	not	not
YOR338W	YOR338W	35.8991	34.2 - 37.8	71.768	63.3 - 82	1.99011	1.70614	0.00038292	0.00716439	induced	116.029	78.5 - 169	3.1961	1.94328	0.000933077	0.00832396	induced	74.2887	67.9 - 81.5	2.07222	1.114	0.0854273	0.206839	not	not
YKR041W	YKR041W	35.9657	21.3 - 60.4	56.2928	55.8 - 56.3	1.56648	1.34296	0.0396427	0.0795668	not	94.9821	NA	2.64639	1.60905	0.00601949	0.0218244	induced	84.1345	NA	2.34274	1.25943	0.088947	0.212361	not	not
YOR376W-A	YOR376W-A	35.9739	29.5 - 42	32.4811	18.9 - 56.5	0.907285	0.777826	0.0631247	0.112914	not	33.9643	22.5 - 51.7	0.944694	0.57439	0.00371792	0.0162655	repressed	44.6123	35.9 - 56.2	1.25116	0.672612	0.00283579	0.0450511	not	not
YJL161W	FMP33	36.113	27.6 - 43.6	35.556	18.2 - 58.9	0.961198	0.824046	0.319849	0.408275	not	59.3375	38.9 - 85.4	1.64622	1.00093	0.994491	0.995195	not	76.8565	62.3 - 96.2	2.16248	1.16253	0.135587	0.276359	not	not
YGL263W	COS12	36.2144	16.3 - 67.2	29.719	16.8 - 50.2	0.844144	0.723694	0.205437	0.285561	not	29.3773	28.5 - 30.5	0.862254	0.524265	0.0127829	0.0359165	repressed	30.3894	19.3 - 45.6	0.885342	0.475951	0.00894286	0.0667217	not	reliable
YNR002C	ATO2	36.2859	24.5 - 49	37.4153	26.4 - 53.7	1.05565	0.905023	0.38276	0.471551	not	48.8193	46.9 - 50.7	1.37587	0.836553	0.138628	0.211395	not	69.9555	61.3 - 80.7	1.97431	1.06137	0.571458	0.704133	not	not
YHR007C-A	YHR007C-A	36.3726	30.5 - 44.5	20.8077	15.6 - 28	0.571255	0.489743	0.000120166	0.00626999	repressed	29.5555	16.5 - 50.1	0.790659	0.480734	0.00424185	0.0175508	repressed	40.8754	36.3 - 46	1.12276	0.603582	0.000210022	0.0187657	repressed	not
YDL024C	DIA3	36.7328	22.5 - 53.8	31.6409	25.5 - 37.2	0.883261	0.757229	0.102735	0.164889	not	49.0808	27.8 - 79.4	1.35053	0.821143	0.314641	0.407794	not	55.7344	37.9 - 79.1	1.556	0.836488	0.278649	0.436576	not	not
YMR107W	SPG4	36.9928	24.4 - 51.7	20.417	16.1 - 25.9	0.566823	0.485944	0.00108516	0.00995202	repressed	34.5198	22.5 - 50.1	0.950054	0.577649	0.00719281	0.0244702	repressed	62.1488	39.4 - 95.8	1.70113	0.914512	0.569228	0.702346	not	not
YDL169C	UGX2	37.0005	33 - 43.3	26.7007	15.8 - 42.3	0.703214	0.602873	0.0102623	0.0309071	repressed	33.0833	31.8 - 34.2	0.895189	0.54429	2.78427e-05	0.0060363	repressed	63.6068	55.3 - 72.8	1.71664	0.922849	0.254207	0.413159	not	not
YLR004C	THI73	37.034	29.2 - 47.4	37.9457	32.4 - 45.6	1.0237	0.87763	0.0672225	0.118742	not	60.6875	51.7 - 70.8	1.631	0.991674	0.919323	0.936206	not	83.5732	72.3 - 95.4	2.25152	1.21039	0.0364572	0.126427	not	not
YER153C	PET122	37.0743	30.9 - 42.7	24.7589	19.2 - 33.2	0.67552	0.57913	0.000813202	0.00907192	repressed	36.5988	31.2 - 41.8	0.999064	0.607448	0.000591707	0.00732318	repressed	44.792	35.9 - 55.4	1.21932	0.655494	0.00282189	0.0450511	repressed	not
YDL149W	ATG9	37.2065	NA	87.8512	64.3 - 116	2.35519	2.01913	0.00077197	0.0090212	induced	142.603	104 - 193	3.84048	2.33508	0.000220186	0.0060363	induced	113.254	NA	3.07679	1.65405	0.000394329	0.0226117	induced	not
YLR125W	YLR125W	37.6062	16.6 - 80.5	52.5238	36.5 - 76.3	1.39155	1.19299	0.424429	0.512067	not	76.9815	67.5 - 89.4	2.08729	1.2691	0.215726	0.302017	not	92.1179	NA	2.49768	1.34273	0.134159	0.274332	not	not
YGR240C-A	YGR240C-A	37.6882	33.8 - 43.3	28.8589	23.4 - 34.3	0.76138	0.652739	0.00149487	0.0109521	repressed	39.5236	35 - 47.4	1.05019	0.638532	0.000247772	0.0060363	repressed	91.8677	90.6 - 92.4	2.44229	1.31295	0.00130003	0.0334131	not	not
YHL022C	SPO11	37.7138	23.4 - 55.6	38.5954	29.7 - 46.7	1.03859	0.890396	0.466654	0.551367	not	45.4088	28 - 67.6	1.2243	0.744398	0.102705	0.166382	not	79.5161	62.5 - 97.1	2.16508	1.16393	0.284572	0.442667	not	not
YOR107W	RGS2	37.7785	31.8 - 42.6	65.776	59.9 - 74.9	1.76055	1.50934	0.000919388	0.00954139	induced	105.918	NA	2.80929	1.7081	0.00229328	0.0123205	induced	91.3286	NA	2.44045	1.31196	0.0116646	0.0745483	not	not
YLL066W-B	YLL066W-B	38.1915	22.9 - 63.6	57.6278	56.5 - 58.4	1.50954	1.29414	0.0670622	0.118563	not	92.5893	49.8 - 172	2.38996	1.45314	0.0647505	0.115822	not	98.5723	98.5 - 98.6	2.59125	1.39303	0.0233107	0.0994135	not	not
YBL097W	BRN1	38.2726	32.3 - 45.5	49.0608	46 - 51.3	1.27611	1.09403	0.226627	0.308943	not	61.098	56.6 - 65.7	1.59478	0.96965	0.621956	0.696453	not	87.9804	57.7 - 131	2.27195	1.22138	0.11113	0.243247	not	not
YMR053C	STB2	38.2726	33.2 - 45.8	35.6857	25.4 - 52.4	0.932312	0.799281	0.0165734	0.0424544	not	66.5982	48.5 - 88.6	1.73805	1.05677	0.447653	0.537382	not	82.9154	76.5 - 89	2.16585	1.16434	0.0382206	0.129214	not	not
YOL047C	YOL047C	38.2737	16.1 - 89.8	37.2097	35.2 - 39.4	0.99398	0.85215	0.430323	0.517853	not	42.5694	39.5 - 46.6	1.14052	0.693457	0.0996119	0.162693	not	64.0201	49.2 - 80.3	1.7112	0.919924	0.674306	0.787828	not	not
YLR080W	EMP46	38.5211	25.6 - 54.1	54.5908	41.2 - 70.5	1.45376	1.24633	0.0865728	0.144228	not	82.6843	65.1 - 104	2.18837	1.33057	0.0577967	0.106033	not	126.221	115 - 137	3.36152	1.80712	0.00140997	0.0342943	induced	not
YPL223C	GRE1	38.6871	20.3 - 68.7	38.252	33 - 43.6	1.02393	0.87783	0.452368	0.538992	not	59.2902	37.7 - 87.9	1.5917	0.967782	0.850261	0.881429	not	70.1813	24 - 170	1.7861	0.960191	0.879086	0.928831	not	not
YCR098C	GIT1	38.9335	34.5 - 44.6	36.7452	33.3 - 39	0.940076	0.805938	0.0191142	0.0466394	not	69.3665	69.3 - 69.3	1.78468	1.08512	0.140374	0.213372	not	79.3412	74.2 - 84.1	2.04045	1.09692	0.119684	0.255254	not	not
YLR162W	YLR162W	38.9712	18.6 - 73.7	20.3964	12.9 - 30	0.543349	0.465819	0.00791717	0.0262945	repressed	38.3127	23.2 - 66.1	1.02456	0.622952	0.0523116	0.098428	not	74.5946	26.6 - 177	1.9048	1.024	0.930792	0.958622	not	not
YNL144C	YNL144C	38.9823	28.2 - 54.8	68.9616	41.1 - 111	1.71603	1.47118	0.0519746	0.0976315	not	68.1136	NA	1.74676	1.06206	0.517833	0.601657	not	85.2425	NA	2.18752	1.17599	0.0950222	0.220578	not	not
YMR081C	ISF1	38.9823	28.4 - 53.8	32.2236	28.2 - 37.6	0.827032	0.709023	0.00619715	0.0226995	not	43.1795	34.7 - 52.1	1.10315	0.670732	0.00719483	0.0244702	not	53.9314	48.5 - 59.8	1.38408	0.744068	0.0119397	0.0754537	not	not
YFL061W	DDI2	39.065	36 - 41.1	32.2201	30.7 - 33.6	0.830738	0.7122	0.00139184	0.0108583	not	40.4467	38.3 - 43.2	1.04427	0.634936	0.000316663	0.00611026	repressed	78.4123	58.4 - 103	2.01139	1.08131	0.40736	0.561137	not	not
YDR253C	MET32	39.2728	37.5 - 40.5	29.3437	26.9 - 31.3	0.752959	0.64552	0.000302361	0.00670305	repressed	36.0618	32.3 - 40.3	0.924864	0.562333	0.000183027	0.0060363	repressed	82.6223	59.4 - 115	2.10266	1.13037	0.249649	0.408568	not	not
YLR234W	TOP3	39.5052	38.2 - 40.2	48.1416	46.9 - 49.5	1.22458	1.04985	0.450908	0.537365	not	71.7682	61.6 - 85.2	1.82997	1.11265	0.12838	0.198664	not	71.8474	60.7 - 84.2	1.83169	0.984697	0.799541	0.877757	not	not
YAR035C-A	YAR035C-A	39.527	23.7 - 62.4	53.1833	43.1 - 64.8	1.38983	1.19152	0.194298	0.273507	not	60.5723	41.9 - 86.2	1.57713	0.958921	0.761844	0.813909	not	68.7566	57.8 - 81.6	1.79093	0.962788	0.774955	0.85944	not	not
YGR087C	PDC6	39.578	31 - 50.8	22.3515	16.6 - 30.1	0.563668	0.483239	0.000153397	0.00626999	repressed	52.5295	37.9 - 70.3	1.31174	0.797561	0.0774739	0.133718	not	57.511	44.6 - 72.3	1.44503	0.776835	0.0267851	0.106575	not	not
YDR540C	IRC4	39.9007	31.1 - 46.7	65.2881	50.9 - 80.2	1.64139	1.40718	0.0248444	0.0567758	not	114.603	93.3 - 140	2.903	1.76507	0.00142833	0.00995225	induced	104.648	93.8 - 116	2.66455	1.43244	0.00453776	0.0522721	not	not
YAR066W	YAR066W	39.9799	34.9 - 45.4	27.8233	18.5 - 40.5	0.695209	0.59601	0.000957005	0.00966535	repressed	30.9398	30.1 - 31.7	0.775803	0.471701	8.30878e-06	0.0060363	repressed	40.9354	36.1 - 47.2	1.02495	0.551004	5.46675e-05	0.00966249	repressed	not
YOL052C-A	DDR2	40.0582	16.5 - 79.6	49.6656	29.8 - 77.9	1.28109	1.09829	0.712932	0.77174	not	80.2249	37.5 - 157	2.04404	1.24281	0.446178	0.53602	not	91.6683	55.1 - 151	2.40958	1.29537	0.28731	0.445517	not	not
YKL217W	JEN1	40.0611	27.9 - 54.5	38.0247	17 - 71.3	0.917048	0.786195	0.30158	0.388188	not	53.321	52.6 - 53.6	1.35959	0.826656	0.10557	0.169569	not	62.17	43.3 - 91	1.57627	0.847387	0.213989	0.371036	not	not
YJR115W	YJR115W	40.239	33.2 - 49.4	38.4993	34.3 - 43.9	0.955536	0.819191	0.012152	0.034496	not	59.6749	54.1 - 64.6	1.48349	0.901986	0.105659	0.16963	not	71.0941	44.4 - 112	1.75092	0.941278	0.561141	0.695555	not	not
YEL073C	YEL073C	40.4929	34.1 - 46.5	33.7423	19.9 - 49.4	0.818987	0.702127	0.0595461	0.108328	not	43.0748	NA	1.06141	0.645355	0.0177916	0.0444868	repressed	73.7604	33.9 - 153	1.78387	0.958993	0.815961	0.887173	not	not
YOR049C	RSB1	40.9158	32.3 - 50.8	65.8535	34.6 - 118	1.58965	1.36283	0.0531897	0.0994515	not	106.203	84 - 134	2.59198	1.57597	0.000904163	0.00822178	induced	41.3337	36.1 - 47	1.00942	0.542652	0.000103118	0.0138865	repressed	not
YIR028W	DAL4	40.9469	37.3 - 44.6	43.4427	29.7 - 61.3	1.03812	0.889995	0.393022	0.481363	not	57.0509	41.9 - 73.8	1.38361	0.841259	0.112247	0.178362	not	93.7658	75.7 - 117	2.28811	1.23007	0.0248522	0.102737	not	not
YJR078W	BNA2	40.9734	34.8 - 47.9	42.2026	35 - 49.9	1.01805	0.872783	0.194806	0.274017	not	46.3895	32.9 - 64.4	1.12067	0.681385	0.00899068	0.0282507	not	42.2459	41.1 - 43.4	1.03221	0.554907	2.65378e-05	0.00789987	repressed	not
YPR153W	YPR153W	41.0892	30.7 - 53	36.2041	33.7 - 39.7	0.896593	0.768659	0.0277472	0.0613916	not	60.6395	49.9 - 74	1.49536	0.909206	0.408079	0.499591	not	94.8673	64.6 - 135	2.34097	1.25848	0.0783734	0.195923	not	not
YNL012W	SPO1	41.2113	34.5 - 48.1	30.3086	27.2 - 34.3	0.745515	0.639138	0.00101585	0.00984617	repressed	32.6363	20.8 - 52.7	0.788915	0.479674	0.00235049	0.0124927	repressed	72.9857	65.2 - 82.9	1.79481	0.964873	0.644135	0.762916	not	not
YHR124W	NDT80	41.2274	32.3 - 48.9	40.3237	34.2 - 47.3	0.992784	0.851125	0.0835062	0.139976	not	65.4871	37.8 - 111	1.57117	0.955296	0.777269	0.825584	not	76.9328	76.9 - 76.9	1.89556	1.01903	0.813689	0.886395	not	not
YIR018C-A	YIR018C-A	41.5353	33 - 51.5	56.5421	54.2 - 58.4	1.37804	1.18141	0.109936	0.173493	not	78.906	40.6 - 150	1.89668	1.15321	0.364912	0.458756	not	77.2873	54.7 - 107	1.88252	1.01202	0.907898	0.946557	not	not
YDL021W	GPM2	41.5677	27 - 62.5	38.6641	25.6 - 53.3	0.936441	0.802821	0.217035	0.298484	not	61.3979	49.8 - 73.1	1.52094	0.924757	0.514601	0.599255	not	42.4893	37.8 - 48.3	1.05094	0.564976	0.00302488	0.0462512	repressed	not
YKR097W	PCK1	41.6078	36 - 47.9	48.3812	40.9 - 56	1.15225	0.987833	0.890536	0.914848	not	68.9191	53.5 - 88	1.64709	1.00146	0.986474	0.989448	not	145.298	142 - 148	3.49767	1.88031	1.75585e-05	0.00789987	induced	not
YPR192W	AQY1	41.608	31.4 - 55.9	38.0514	27.4 - 49.2	0.896494	0.768574	0.0787617	0.133656	not	65.954	61.7 - 71	1.58262	0.96226	0.612076	0.686885	not	100.99	62.2 - 166	2.40486	1.29283	0.051975	0.154721	not	not
YOL091W	SPO21	41.7027	30.1 - 55	51.6268	48.9 - 54.2	1.26084	1.08093	0.428539	0.516365	not	67.7708	59.9 - 76.2	1.65824	1.00824	0.931312	0.944854	not	94.982	75.8 - 116	2.31942	1.2469	0.0659553	0.177218	not	not
YJR106W	ECM27	41.8374	36.1 - 47.2	40.3822	29.2 - 52.3	0.959942	0.822969	0.158875	0.232473	not	68.5704	29.1 - 156	1.56725	0.952913	0.82745	0.864317	not	65.1879	43.5 - 94.6	1.55921	0.838214	0.176144	0.326113	not	not
YOR313C	SPS4	42.0058	23.7 - 66.1	30.8251	30 - 32	0.76357	0.654616	0.0277543	0.0613916	not	37.9635	29.1 - 46.3	0.939637	0.571315	0.0103252	0.0308338	repressed	42.1618	42.2 - 42.2	1.04737	0.563055	0.00691107	0.061268	not	not
YHR105W	YPT35	42.3027	39.3 - 44.7	34.932	15.4 - 66.2	0.779474	0.668252	0.0963983	0.157036	not	43.5573	31.1 - 63	1.02691	0.624379	0.00207008	0.0117672	repressed	73.2936	63.3 - 84.3	1.73552	0.932998	0.277562	0.435596	not	not
YGL081W	YGL081W	42.3231	27.2 - 65.9	43.8141	41.6 - 45.9	1.03318	0.885756	0.257613	0.342596	not	49.0455	29.6 - 75.9	1.13594	0.690671	0.0514927	0.0972106	not	52.3806	37.7 - 73.7	1.23277	0.662725	0.0107455	0.0721812	not	not
YNL328C	MDJ2	42.3748	NA	82.3944	80.4 - 84.2	1.9529	1.67424	9.92005e-05	0.00626999	induced	98.7157	NA	2.34333	1.42478	0.000614279	0.00747175	not	87.8056	NA	2.07293	1.11439	0.225305	0.383128	not	not
YGR035W-A	YGR035W-A	42.6839	36.9 - 50.2	45.7699	45.1 - 46	1.08164	0.927301	0.380858	0.469924	not	75.2661	42.7 - 128	1.76202	1.07134	0.608775	0.684448	not	80.1733	62.5 - 103	1.89244	1.01736	0.859265	0.917419	not	not
YKL071W	YKL071W	43.0977	19.6 - 82.1	50.5747	39.9 - 62.6	1.24817	1.07007	0.714293	0.77272	not	81.2383	38.9 - 160	1.95702	1.1899	0.467137	0.555769	not	100.994	94.3 - 109	2.49103	1.33915	0.147478	0.292064	not	not
YER184C	YER184C	43.5202	38.3 - 47.8	53.508	42.8 - 65.6	1.21755	1.04382	0.647967	0.716641	not	83.286	65.5 - 106	1.91575	1.16481	0.0461099	0.089253	not	96.1641	81.1 - 114	2.20907	1.18758	0.0345475	0.122508	not	not
YNR034W-A	YNR034W-A	43.581	26.1 - 66.5	33.6123	21.1 - 50	0.774562	0.66404	0.0650695	0.11577	not	125.726	117 - 133	2.98055	1.81222	0.00368429	0.0161788	induced	138.126	121 - 162	3.26878	1.75726	0.00532398	0.0560907	not	not
YEL019C	MMS21	43.6836	33.3 - 56.8	43.503	32.9 - 57.6	0.995889	0.853787	0.0464714	0.089621	not	60.2004	NA	1.37032	0.833175	0.0749251	0.130304	not	87.6076	NA	2.00561	1.0782	0.249457	0.408373	not	not
YOR242C	SSP2	43.6838	35.9 - 51.4	67.6349	66.8 - 68.6	1.54657	1.32589	0.00212288	0.0128215	not	76.3973	43.7 - 123	1.73127	1.05264	0.651459	0.723401	not	80.3902	64.5 - 99.5	1.83824	0.98822	0.855675	0.914531	not	not
YNL202W	SPS19	43.6838	36.2 - 51.2	51.6559	49.5 - 54.2	1.17778	1.00972	0.884929	0.910526	not	63.0269	54.4 - 72.3	1.44398	0.877966	0.0492629	0.0940962	not	63.4612	60.3 - 67	1.45303	0.781136	0.00410533	0.0512948	not	not
YBR020W	GAL1	43.7689	28.2 - 69.1	83.6936	56.4 - 118	1.91093	1.63826	0.00412169	0.017755	induced	92.4981	68.6 - 126	2.09177	1.27183	0.104648	0.168437	not	79.2806	77.1 - 80.3	1.81387	0.97512	0.786033	0.869	not	not
YML054C	CYB2	43.7879	31.6 - 58.8	57.3791	52.5 - 62.9	1.30909	1.1223	0.128227	0.195682	not	101.443	78.9 - 130	2.29814	1.39731	0.0147849	0.0392229	not	86.0518	67 - 110	1.95533	1.05117	0.588818	0.716976	not	not
YBR045C	GIP1	43.9701	41.3 - 46	38.2242	36.2 - 39.8	0.869211	0.745184	0.00215302	0.0128319	not	73.5456	65.2 - 82.6	1.67359	1.01757	0.78084	0.828664	not	116.354	94.3 - 137	2.64171	1.42016	0.00362326	0.0498082	not	not
YEL070W	DSF1	43.9947	28.4 - 65.3	38.288	35.9 - 40	0.890816	0.763706	0.0770914	0.131493	not	48.9112	34.2 - 72.9	1.14165	0.694141	0.0299609	0.064736	not	116.964	88.2 - 151	2.72164	1.46313	0.028603	0.109681	not	not
YGR256W	GND2	44.1643	35.7 - 53.4	41.6339	29.4 - 54.7	0.923839	0.792017	0.0986216	0.159681	not	71.1064	64.9 - 77	1.60876	0.978153	0.715905	0.777041	not	84.2449	66.5 - 102	1.89997	1.02141	0.788838	0.871249	not	not
YCR010C	ADY2	44.2859	29.9 - 62	40.4119	29.5 - 55.4	0.938123	0.804263	0.102681	0.164861	not	54.9847	31 - 92.5	1.25947	0.765782	0.131019	0.202084	not	67.3452	45 - 96.5	1.54528	0.830726	0.237002	0.39589	not	not
YPL230W	USV1	44.4048	39.1 - 49.7	57.2062	46.2 - 70.1	1.29048	1.10634	0.0901003	0.148921	not	109.654	93.8 - 127	2.46175	1.49679	0.0016497	0.0106903	not	108.375	63.9 - 181	2.4085	1.29479	0.0665385	0.177939	not	not
YHR015W	MIP6	44.4471	42.8 - 45	45.9453	40 - 51.3	1.03693	0.888969	0.0453774	0.0883493	not	75.8383	47.7 - 120	1.67793	1.02021	0.879603	0.904845	not	97.3009	87.5 - 109	2.1974	1.1813	0.0159863	0.0843379	not	not
YKL187C	YKL187C	44.6109	27.4 - 72.8	56.3583	52.9 - 60.4	1.26812	1.08717	0.498651	0.582006	not	83.1993	51.4 - 129	1.84107	1.1194	0.504317	0.590807	not	70.1785	35.4 - 134	1.54299	0.829496	0.329605	0.487217	not	not
YGR289C	MAL11	45.1393	41.7 - 47.3	51.3435	36.3 - 71.8	1.13964	0.977029	0.712439	0.771502	not	70.1321	68.4 - 71.4	1.55689	0.946614	0.307672	0.400966	not	76.8848	68.8 - 84.9	1.70759	0.917982	0.120508	0.256333	not	not
YMR154C	RIM13	45.2718	27.8 - 72.2	64.389	61.2 - 67.8	1.42638	1.22285	0.110158	0.173711	not	117.913	116 - 120	2.61249	1.58844	0.0059716	0.0217481	induced	90.3426	59.9 - 136	1.97819	1.06345	0.676958	0.79011	not	not
YJL107C	YJL107C	45.3866	37.6 - 53.3	51.5789	42.8 - 61.7	1.13996	0.977298	0.83232	0.869363	not	64.1493	52.6 - 80.7	1.42522	0.866558	0.187086	0.2698	not	96.1197	89.6 - 104	2.14717	1.1543	0.108653	0.239775	not	not
YGR043C	NQM1	45.8321	36.2 - 57.1	51.8233	43.5 - 60.9	1.1308	0.969448	0.576712	0.655904	not	49.6817	41.8 - 58.7	1.08418	0.659201	0.000471527	0.00673898	repressed	69.9869	41.9 - 111	1.5091	0.811279	0.104005	0.233855	not	not
YOR394C-A	YOR394C-A	45.8461	41.5 - 50.5	53.7073	50.7 - 56.8	1.1715	1.00434	0.931016	0.948172	not	67.2116	55.9 - 78.8	1.46773	0.892407	0.0801918	0.137361	not	99.7458	90.1 - 110	2.17851	1.17114	0.0194701	0.0912304	not	not
YNL014W	HEF3	45.8768	27 - 71.5	72.4012	47.4 - 107	1.59981	1.37154	0.106378	0.168962	not	86.6834	67.5 - 109	1.95358	1.18781	0.2362	0.324259	not	81.6084	53.5 - 124	1.82491	0.981054	0.901306	0.942812	not	not
YOR289W	YOR289W	45.8768	28.3 - 70.8	56.2928	56.1 - 56.1	1.26691	1.08614	0.540267	0.621593	not	118.284	86 - 164	2.6403	1.60535	0.021413	0.050717	not	96.0852	89.7 - 103	2.16847	1.16575	0.260934	0.419317	not	not
YIR032C	DAL3	46.0475	39.5 - 52.5	55.4057	41.6 - 74.1	1.19648	1.02575	0.833191	0.870112	not	78.5019	76.9 - 81.4	1.72428	1.04839	0.506267	0.59189	not	70.018	67.1 - 73.2	1.53834	0.826999	0.0283948	0.109494	not	not
YIL029C	YIL029C	46.4472	45.6 - 46.9	48.526	15.7 - 125	0.965527	0.827757	0.457676	0.543275	not	66.3641	61 - 73.2	1.43217	0.870782	0.0539512	0.100741	not	110.257	95.6 - 131	2.38292	1.28104	0.00301514	0.0462512	not	not
YFL020C	PAU5	46.6028	46.1 - 46.7	28.9019	27.6 - 30	0.622697	0.533845	2.38246e-05	0.00626999	repressed	48.7477	46.5 - 51.1	1.04959	0.638166	0.000339076	0.00622666	repressed	86.4308	85.1 - 87.9	1.86375	1.00193	0.970345	0.981384	not	not
YNR075C-A	YNR075C-A	46.6751	43.8 - 49.8	37.1801	26.4 - 49.9	0.783684	0.671861	0.0129247	0.0357118	not	63.1941	50.4 - 76.8	1.35659	0.824829	0.0136464	0.037341	not	94.8864	76.3 - 115	2.03388	1.0934	0.19288	0.345586	not	not
YDL210W	UGA4	46.8287	38.5 - 55.3	59.0249	55.3 - 62.3	1.27673	1.09455	0.259839	0.344907	not	70.2895	46.5 - 103	1.49504	0.909007	0.492957	0.580314	not	86.4615	82.7 - 90.5	1.87093	1.00579	0.940908	0.965515	not	not
YLR267W	BOP2	47.0009	37.4 - 60.6	46.6548	37.4 - 57	0.992633	0.850995	0.0309437	0.066142	not	63.1836	36.6 - 103	1.3139	0.798874	0.153826	0.229441	not	85.3193	80 - 93.2	1.81304	0.974674	0.703228	0.808205	not	not
YHR035W	YHR035W	47.3115	34.7 - 63.8	49.0856	25.8 - 90.3	1.02648	0.880012	0.34514	0.434382	not	79.7502	68.5 - 90.4	1.67952	1.02118	0.804508	0.848778	not	85.3562	72.3 - 99.7	1.79836	0.966778	0.690609	0.799752	not	not
YGL089C	MF(ALPHA)2	47.4265	39 - 58.1	30.0389	28.5 - 32.1	0.633257	0.542898	4.2364e-05	0.00626999	repressed	38.1126	37.4 - 38.6	0.803873	0.488768	2.3078e-05	0.0060363	repressed	79.6157	68.8 - 90.1	1.67557	0.900769	0.165763	0.31451	not	not
YGR213C	RTA1	47.4898	22.9 - 87.4	34.3194	24.9 - 48.6	0.76239	0.653605	0.0472727	0.0909128	not	55.5771	45.6 - 69.3	1.22701	0.746043	0.14785	0.221815	not	146.552	126 - 165	3.25628	1.75054	0.0148037	0.0817951	not	not
YIL113W	SDP1	48.0076	33.5 - 66.4	64.4756	44.8 - 91.6	1.37661	1.18018	0.211572	0.292723	not	85.7954	81.3 - 89.9	1.83446	1.11538	0.343685	0.437347	not	85.205	59 - 120	1.81013	0.973106	0.83576	0.901422	not	not
YKR058W	GLG1	48.046	37.5 - 60.3	71.3595	58.3 - 87.1	1.47217	1.26211	0.0390567	0.0788664	not	120.591	62.4 - 210	2.46287	1.49747	0.0283092	0.0622296	not	145.279	121 - 176	3.01109	1.61873	0.00118673	0.0327034	induced	not
YGR248W	SOL4	48.046	17.4 - 111	42.1941	31.4 - 54.2	0.943324	0.808722	0.421109	0.50893	not	95.0342	74.9 - 117	2.16537	1.31658	0.266559	0.357604	not	80.4063	70 - 93.9	1.8325	0.985135	0.948021	0.970072	not	not
YPL038W-A	YPL038W-A	48.0717	19.7 - 104	71.3595	58.1 - 85.3	1.50786	1.2927	0.239716	0.323279	not	75.9066	NA	1.61701	0.983168	0.929981	0.944001	not	112.022	97.3 - 133	2.38753	1.28351	0.223994	0.382487	not	not
YNR004W	SWM2	48.3884	16.3 - 121	58.1897	52.9 - 64	1.32695	1.13761	0.617565	0.690889	not	50.3478	29.7 - 87.8	1.13828	0.692096	0.212809	0.299228	not	134.182	108 - 170	3.05892	1.64445	0.0915066	0.215651	not	not
YNL033W	YNL033W	48.9045	46.5 - 50.8	50.3544	48.3 - 52	1.03124	0.884094	0.122833	0.189022	not	54.0146	44 - 64.4	1.10386	0.671164	0.00417451	0.0173356	not	74.6222	40.8 - 130	1.49308	0.802666	0.198624	0.352169	not	not
YFL056C	AAD6	48.9889	45.5 - 53.5	55.2909	52.5 - 58.3	1.13003	0.96879	0.519662	0.602151	not	67.8562	NA	1.37918	0.838566	0.0731205	0.127803	not	123.248	120 - 130	2.51982	1.35463	0.00144576	0.0347967	not	not
YKL188C	PXA2	49.0383	47.8 - 49.8	68.139	50.2 - 89.8	1.39538	1.19627	0.0275873	0.0611179	not	94.7809	93.6 - 96	1.94108	1.18021	0.0191126	0.0467926	not	102.231	NA	2.09484	1.12616	0.0487896	0.149731	not	not
YNR058W	BIO3	49.0777	27.6 - 81	76.465	65.3 - 90.9	1.61796	1.38709	0.0851913	0.142178	not	124.323	82.2 - 179	2.63424	1.60166	0.0299956	0.0647786	not	171.792	129 - 221	3.64091	1.95732	0.00608799	0.0583661	not	not
YER024W	YAT2	49.1944	37.5 - 64.4	80.937	72.3 - 91.5	1.64508	1.41035	0.00198056	0.012256	not	103.446	79.3 - 136	2.08376	1.26696	0.0561736	0.103728	not	96.728	78.8 - 117	1.96277	1.05517	0.487165	0.634307	not	not
YOR365C	YOR365C	49.3372	30.4 - 77.8	21.9937	19.4 - 25.6	0.446606	0.38288	9.33359e-05	0.00626999	repressed	40.1337	39.2 - 41.3	0.814861	0.495449	0.000412551	0.00654862	repressed	91.492	67 - 126	1.8425	0.990508	0.939115	0.96469	not	not
YMR101C	SRT1	49.4834	43.8 - 54.3	49.667	35.4 - 69.5	0.991133	0.849709	0.240084	0.323698	not	58.5968	44.5 - 76.4	1.18389	0.719825	0.0164949	0.042227	not	86.5394	82.2 - 92.1	1.76388	0.948244	0.424627	0.577746	not	not
YLR162W-A	RRT15	49.5928	38.5 - 65.4	71.762	40.3 - 120	1.39772	1.19828	0.294029	0.37989	not	63.317	55.6 - 73.5	1.27654	0.776161	0.0102553	0.0306574	not	91.7235	81.4 - 107	1.84622	0.99251	0.920627	0.953675	not	not
YLL025W	PAU17	50.1575	20.2 - 119	55.9767	22.9 - 123	1.11433	0.955331	0.846405	0.880336	not	78.583	57.4 - 102	1.58332	0.962683	0.848443	0.879875	not	157.663	129 - 189	3.20344	1.72214	0.02252	0.0982819	not	not
YBR184W	YBR184W	50.2329	21.6 - 96.8	65.8535	33.7 - 122	1.38064	1.18364	0.458344	0.543629	not	97.3089	49.8 - 184	2.02831	1.23325	0.372053	0.465766	not	110.846	59.5 - 213	2.31012	1.2419	0.347858	0.507345	not	not
YLR213C	CRR1	50.3233	44.3 - 56.8	37.3282	32 - 45.5	0.742536	0.636584	9.6557e-05	0.00626999	repressed	51.1934	42.2 - 62.8	1.01859	0.619322	0.000124559	0.0060363	repressed	74.5518	66.2 - 82.7	1.48325	0.797379	0.00405045	0.0512948	not	not
YIL164C	NIT1	50.5538	24.4 - 94.8	63.5615	50.3 - 80.1	1.27083	1.0895	0.568488	0.648129	not	70.5931	55.4 - 88.7	1.40921	0.856823	0.332999	0.426618	not	113.32	68.8 - 193	2.2346	1.2013	0.327861	0.485822	not	not
YBR182C	SMP1	50.6973	42.8 - 59.6	63.6569	62.6 - 64.5	1.25422	1.07525	0.219518	0.301211	not	87.3851	80.7 - 95.2	1.72068	1.0462	0.498718	0.585218	not	148.403	135 - 162	2.92862	1.5744	0.000170235	0.0180177	induced	not
YPR030W	CSR2	51.0804	43.5 - 59.2	73.8949	55.1 - 97.1	1.42848	1.22465	0.0814126	0.137167	not	117.578	106 - 132	2.29889	1.39776	0.00183056	0.0111946	not	129.27	116 - 147	2.53258	1.36149	0.00101276	0.031964	not	not
YJL116C	NCA3	51.1243	30.8 - 81	49.8871	42.7 - 57.1	1.00541	0.861948	0.359265	0.447775	not	47.6276	24.4 - 80.3	0.941186	0.572257	0.0301328	0.0649988	not	35.2063	18.2 - 65.8	0.697128	0.374769	0.00266538	0.0435705	repressed	not
YER053C-A	YER053C-A	51.3251	36.5 - 69.1	44.1503	43.4 - 44.4	0.855981	0.733842	0.0164847	0.0423038	not	63.9884	NA	1.24516	0.757078	0.0235379	0.0542947	not	52.7244	47.8 - 56.9	1.02695	0.552077	0.000457461	0.0239574	repressed	not
YOR386W	PHR1	51.8954	49.6 - 54.3	68.7472	57.6 - 78.7	1.3196	1.13131	0.137391	0.206892	not	103.664	100 - 108	2.00362	1.21823	0.00711705	0.024308	not	120.671	76.8 - 179	2.29859	1.2357	0.110036	0.241754	not	not
YPR157W	YPR157W	52.0448	45.9 - 58.1	63.4586	52.9 - 75.3	1.23045	1.05488	0.399773	0.487835	not	92.2471	62 - 130	1.76186	1.07124	0.572306	0.652482	not	100.201	76.8 - 128	1.93814	1.04193	0.589166	0.717	not	not
YNL009W	IDP3	52.1032	47.1 - 57.2	40.8772	34.8 - 47.9	0.790788	0.677952	0.000630061	0.00815475	not	51.93	37.6 - 71.1	0.991088	0.602598	0.00475836	0.0189303	repressed	87.4464	45.3 - 170	1.63869	0.880946	0.464926	0.615824	not	not
YHL042W	YHL042W	52.3502	42.8 - 63.4	37.8683	35.9 - 39.5	0.729217	0.625166	0.00243199	0.0136191	repressed	56.6558	40.1 - 78.4	1.08319	0.658595	0.0143572	0.0384491	repressed	84.9674	66.2 - 107	1.64159	0.882504	0.20483	0.360348	not	not
YIL172C	IMA3	52.3536	42 - 63	54.4789	50 - 58.8	1.05063	0.900717	0.271542	0.356014	not	92.1631	89.1 - 94.7	1.7845	1.08501	0.338968	0.432874	not	155.226	123 - 193	2.99586	1.61054	0.00241673	0.0421883	induced	not
YDR185C	UPS3	52.6406	39.2 - 72	40.338	33.3 - 46.8	0.756585	0.648628	0.00850365	0.02746	repressed	49.1247	25.2 - 84.5	0.907777	0.551944	0.00996748	0.0300833	repressed	112.207	43.4 - 245	2.02843	1.09047	0.686679	0.797393	not	not
YHR214C-D	YHR214C-D	52.6953	52.4 - 52.4	75.4805	68.3 - 83.7	1.43125	1.22702	0.0221189	0.0521922	not	62.0423	59.6 - 64	1.18254	0.719002	0.00070648	0.00771295	not	90.2604	65 - 125	1.70626	0.917268	0.376687	0.531705	not	not
YCR068W	ATG15	52.7578	48.3 - 57.3	49.7719	46.4 - 52.1	0.948957	0.813551	0.0138752	0.0375712	not	57.55	45.2 - 73	1.09813	0.667682	0.00122349	0.00922606	not	75.9846	62.5 - 92	1.44651	0.777628	0.0158866	0.0843379	not	not
YHR044C	DOG1	52.8399	44.9 - 60.9	38.1346	24.5 - 54.6	0.711434	0.60992	0.0138833	0.0375712	repressed	56.3911	34.5 - 95.5	1.07042	0.650835	0.00932911	0.0289602	repressed	109.626	78 - 145	2.08153	1.11901	0.317624	0.476141	not	not
YDL109C	YDL109C	52.9419	39.9 - 66.3	50.3987	49.6 - 50.5	0.965622	0.827838	0.0727589	0.126234	not	81.2669	70.8 - 94.8	1.56155	0.949447	0.553277	0.634753	not	81.577	61.2 - 106	1.56289	0.840192	0.113534	0.246981	not	not
YCR107W	AAD3	53.0164	36 - 72.2	103.619	79 - 131	1.93433	1.65833	0.00400848	0.017492	induced	86.2081	44.7 - 162	1.59718	0.971114	0.847412	0.87912	not	87.8639	40.4 - 178	1.61175	0.866461	0.416787	0.57051	not	not
YDL049C	KNH1	53.7705	38.8 - 71.1	60.0457	42.4 - 82.6	1.13719	0.974929	0.80898	0.851906	not	92.2309	79.2 - 106	1.74923	1.06356	0.515769	0.600122	not	128.097	66.9 - 235	2.3787	1.27877	0.1583	0.305475	not	not
YER185W	PUG1	53.8495	48.9 - 59.9	85.6499	67.5 - 107	1.58927	1.3625	0.0167976	0.0427483	not	118.281	100 - 139	2.21643	1.34763	0.00476545	0.0189412	not	114.125	98.8 - 135	2.13904	1.14993	0.0658218	0.176987	not	not
YMR182C	RGM1	54.211	53.2 - 55.1	40.6007	33.3 - 48.9	0.751557	0.644318	0.000102281	0.00626999	repressed	50.4167	44 - 58.4	0.933708	0.56771	3.6864e-05	0.0060363	repressed	96.1365	86.8 - 105	1.77977	0.956785	0.403225	0.558052	not	not
YKL220C	FRE2	54.2113	31.3 - 87.1	68.9024	67.5 - 69.5	1.31941	1.13114	0.413319	0.501767	not	101.19	98.2 - 105	1.94357	1.18172	0.269027	0.360146	not	110.796	108 - 113	2.12757	1.14376	0.36246	0.52026	not	not
YDL222C	FMP45	54.3494	43.7 - 65.5	52.4033	39.3 - 70.1	0.964206	0.826624	0.0235264	0.0545125	not	67.3031	46.6 - 92.9	1.23423	0.750435	0.0129431	0.036205	not	96.7535	91.4 - 103	1.77981	0.95681	0.473825	0.623777	not	not
YOR378W	YOR378W	54.4692	35 - 82.8	88.7393	65.5 - 121	1.62986	1.39729	0.0251773	0.0574264	not	100.141	74.5 - 133	1.82622	1.11037	0.426213	0.517152	not	77.2169	66.2 - 92	1.42011	0.763438	0.0346859	0.122538	not	not
YJL153C	INO1	54.737	35.1 - 79.2	76.3593	75.5 - 76.6	1.43326	1.22875	0.117432	0.182824	not	75.8383	47.2 - 119	1.39646	0.849073	0.350897	0.444182	not	130.489	116 - 148	2.44489	1.31435	0.0646279	0.174897	not	not
YCL068C	YCL068C	54.8295	24.7 - 114	26.3148	21.1 - 30.9	0.509739	0.437005	0.00676785	0.0239843	repressed	31.4444	27 - 35.3	0.614095	0.37338	0.0023401	0.0124766	repressed	78.0469	51.6 - 117	1.5124	0.813051	0.342269	0.501598	not	not
YEL041W	YEF1	54.9864	40.6 - 73.9	55.5798	30.8 - 94.8	1.00427	0.860976	0.218781	0.300565	not	86.047	65.7 - 111	1.5514	0.94328	0.579378	0.658877	not	85.2425	83 - 86.3	1.54982	0.83317	0.0372487	0.127661	not	not
YIR042C	YIR042C	55.1197	35.5 - 84.2	65.7479	61.9 - 71.4	1.19446	1.02403	0.809939	0.852293	not	51.675	46.9 - 57.9	0.939416	0.571181	0.00138258	0.00987569	repressed	94.3383	51.2 - 178	1.68799	0.907449	0.52255	0.663422	not	not
YER038C	KRE29	55.2362	33.2 - 83.7	70.1144	61.5 - 80.1	1.30401	1.11794	0.435528	0.522781	not	113.076	83.3 - 149	2.09883	1.27612	0.14163	0.214934	not	128.653	96.9 - 171	2.3896	1.28463	0.131133	0.270311	not	not
YOR072W-B	YOR072W-B	55.2834	48.7 - 61.5	64.4933	51.2 - 81.7	1.16827	1.00157	0.975944	0.982019	not	91.2989	71 - 116	1.65167	1.00424	0.94656	0.957051	not	100.113	77.1 - 131	1.80883	0.972411	0.677999	0.791162	not	not
YKL050C	YKL050C	56.1809	43.4 - 70.8	72.2023	62.1 - 83.2	1.28518	1.1018	0.144599	0.215906	not	67.8327	33.7 - 129	1.18695	0.721688	0.0506543	0.096109	not	89.8322	85.2 - 95.2	1.59786	0.858996	0.0513396	0.154128	not	not
YCL073C	YCL073C	56.6665	55.1 - 57.1	44.6714	38.1 - 51.4	0.791891	0.678897	0.000329809	0.00682635	not	48.0964	39.7 - 57.6	0.848885	0.516137	0.000189821	0.0060363	repressed	76.8565	62.6 - 94.1	1.36216	0.732284	0.00210279	0.0394875	not	not
YDL223C	HBT1	56.6665	54.5 - 58.1	73.6048	51.5 - 104	1.30268	1.1168	0.209943	0.290754	not	98.5047	57.2 - 161	1.70438	1.03629	0.806823	0.850269	not	93.6363	72.3 - 121	1.65799	0.891319	0.124644	0.262272	not	not
YNR014W	YNR014W	56.9122	26.8 - 122	47.2832	38.3 - 58	0.843563	0.723196	0.0889264	0.147411	not	85.1354	60.8 - 114	1.5034	0.91409	0.630064	0.704695	not	130.487	108 - 161	2.31602	1.24507	0.239239	0.397982	not	not
YOR266W	PNT1	57.3676	56.2 - 58	72.9949	53.3 - 98.3	1.26264	1.08248	0.427476	0.515235	not	108.248	NA	1.88958	1.1489	0.121375	0.189798	not	113.905	NA	1.98333	1.06622	0.461906	0.612794	not	not
YGL121C	GPG1	57.386	41.1 - 77.8	37.9398	32.7 - 42.9	0.65503	0.561565	0.00143942	0.0109521	repressed	58.7474	56.8 - 60.8	1.02231	0.621582	0.00121876	0.00921565	repressed	93.7658	77.2 - 115	1.62798	0.875185	0.186593	0.33913	not	not
YAR029W	YAR029W	57.3871	41.4 - 76.7	55.0691	NA	0.980327	0.840445	0.118444	0.183792	not	78.8186	NA	1.40414	0.85374	0.154888	0.230721	not	90.6843	NA	1.61505	0.868233	0.19027	0.343494	not	not
YIL071C	PCI8	57.6467	28.2 - 115	52.7996	35 - 75.5	0.905235	0.776068	0.232085	0.314911	not	59.3375	NA	1.02665	0.624218	0.0414314	0.0822809	not	98.6405	75.9 - 126	1.72284	0.926183	0.6498	0.76712	not	not
YGL051W	MST27	58.2264	37.1 - 91.7	44.7167	35.5 - 54.2	0.769333	0.659557	0.00527596	0.0205233	repressed	52.5818	52.5 - 52.5	0.904148	0.549737	0.00103131	0.0086484	repressed	103.423	96.4 - 110	1.77951	0.956647	0.652558	0.769893	not	not
YPR061C	JID1	58.2298	55.2 - 61.3	55.0974	48.6 - 62.5	0.948536	0.81319	0.0038982	0.0172365	not	83.3263	56.3 - 119	1.41476	0.8602	0.210171	0.296293	not	113.264	NA	1.9454	1.04583	0.501107	0.646206	not	not
YGR070W	ROM1	58.2429	46.4 - 70.9	99.1329	87.2 - 112	1.73086	1.48388	0.00335479	0.0160395	not	149.914	99.2 - 223	2.57579	1.56612	0.0152628	0.0402044	induced	118.824	87.3 - 163	2.0682	1.11184	0.298959	0.458258	not	not
YDL079C	MRK1	58.6755	47.7 - 71.2	73.8352	65.2 - 82.2	1.25836	1.07881	0.19995	0.279446	not	108.547	83.9 - 143	1.84538	1.12202	0.177394	0.258061	not	131.737	131 - 134	2.24451	1.20663	0.0179443	0.0876448	not	not
YLR281C	YLR281C	58.7757	26.1 - 117	49.3476	42.9 - 55.5	0.894505	0.766869	0.192637	0.27183	not	75.3108	59.4 - 95.6	1.36469	0.829752	0.346564	0.440486	not	161.961	156 - 169	2.93625	1.5785	0.0449115	0.142149	not	not
YDL238C	GUD1	58.9528	55.4 - 61.4	50.12	47.9 - 52.3	0.853566	0.731771	0.00187299	0.0119444	not	94.9618	87.4 - 102	1.62127	0.985758	0.792416	0.838994	not	134.224	103 - 170	2.28671	1.22931	0.0205436	0.0939994	not	not
YOR156C	NFI1	59.0767	54.2 - 64.8	95.0779	82 - 108	1.61248	1.38239	0.000547654	0.00776823	not	130.627	126 - 135	2.21462	1.34653	0.00106338	0.00876744	not	109.573	103 - 115	1.85667	0.998125	0.972261	0.98202	not	not
YPR007C	REC8	59.1684	51.5 - 65.9	33.3535	26.1 - 43.6	0.569556	0.488287	6.50333e-05	0.00626999	repressed	32.5348	29.3 - 36.4	0.55551	0.33776	4.89838e-06	0.0060363	repressed	95.5982	46 - 180	1.57067	0.844376	0.377583	0.532571	not	not
YPL216W	YPL216W	59.2442	46.8 - 74.8	83.7769	53.5 - 121	1.43052	1.2264	0.087933	0.146193	not	110.552	85.6 - 141	1.89001	1.14916	0.165076	0.243396	not	140.343	108 - 184	2.38891	1.28425	0.0475713	0.147351	not	not
YGL156W	AMS1	59.4443	52.4 - 66.3	63.41	52.7 - 75.1	1.06849	0.916029	0.368597	0.45709	not	103.699	83.3 - 129	1.75291	1.0658	0.49515	0.582118	not	139.122	128 - 152	2.3615	1.26952	0.0173008	0.0862905	not	not
YPL189W	GUP2	59.8073	45.8 - 79	78.8405	58.6 - 105	1.31726	1.1293	0.169289	0.244948	not	90.2536	67 - 122	1.50486	0.914978	0.335254	0.429296	not	93.7247	83.7 - 106	1.56411	0.840851	0.0630865	0.172217	not	not
YFL041W-A	YFL041W-A	59.8173	40 - 88.6	77.0754	74 - 79.4	1.28773	1.10399	0.262936	0.347875	not	89.2186	NA	1.47541	0.897075	0.422325	0.513252	not	124.342	105 - 147	2.07943	1.11788	0.214479	0.371545	not	not
YHR199C-A	NBL1	59.8173	NA	30.6297	25.7 - 37	0.512348	0.439242	8.40101e-05	0.00626999	repressed	40.4416	NA	0.676033	0.411039	5.70412e-05	0.0060363	repressed	99.7492	NA	1.66014	0.892476	0.29827	0.45794	not	not
YFL068W	YFL068W	59.84	39.1 - 90	71.9933	56.5 - 88.9	1.19343	1.02314	0.849365	0.882596	not	88.2829	55.5 - 142	1.46324	0.889672	0.408082	0.499591	not	114.489	103 - 124	1.91304	1.02843	0.787553	0.87	not	not
YGR144W	THI4	59.9776	31.7 - 113	65.9554	62.7 - 67.9	1.10426	0.94669	0.679285	0.743572	not	89.1717	81.3 - 97.5	1.49666	0.909996	0.475306	0.563592	not	113.61	91.4 - 136	1.89878	1.02076	0.883017	0.930912	not	reliable
YDR317W	HIM1	60.6399	39.5 - 90	77.6981	51.5 - 119	1.25591	1.07671	0.610934	0.685468	not	84.2283	58.2 - 115	1.37361	0.835178	0.198036	0.282495	not	86.6591	63.4 - 116	1.42024	0.763508	0.0533709	0.157143	not	not
YDL183C	YDL183C	60.6664	38.3 - 96.6	89.1808	61 - 129	1.46939	1.25972	0.104221	0.166565	not	112.526	97.9 - 127	1.85979	1.13079	0.272996	0.364425	not	132.95	91.9 - 191	2.17056	1.16687	0.301035	0.460674	not	not
YER179W	DMC1	60.8312	52.5 - 69.3	50.0782	40 - 63.4	0.812704	0.69674	0.0109528	0.0322159	not	81.275	70.1 - 92.5	1.33151	0.809579	0.0264536	0.0592254	not	106.67	96.1 - 119	1.75456	0.943233	0.299116	0.458358	not	not
YAL037W	YAL037W	61.3397	22.1 - 131	54.827	53.9 - 55.6	0.985232	0.84465	0.500726	0.58406	not	71.623	55.7 - 92.4	1.28724	0.782661	0.343707	0.437347	not	83.8259	78 - 91.3	1.50742	0.810372	0.403142	0.558052	not	not
YFL003C	MSH4	61.3816	53 - 71.3	38.509	30.9 - 48.9	0.627798	0.538218	3.09137e-05	0.00626999	repressed	65.3147	35.6 - 127	1.04443	0.635028	0.0167691	0.0427813	repressed	106.624	104 - 109	1.73831	0.934497	0.225	0.383082	not	not
YER098W	UBP9	61.5771	59.7 - 63.5	86.0325	69.7 - 105	1.39047	1.19206	0.0654269	0.116223	not	147.89	120 - 186	2.39472	1.45603	0.00390023	0.0167028	not	176.133	160 - 193	2.86821	1.54192	0.000248266	0.0191316	induced	not
YIR029W	DAL2	61.6362	51.7 - 71.9	68.8389	49.1 - 97.7	1.12774	0.966825	0.708986	0.769152	not	99.8166	86.9 - 114	1.63864	0.99632	0.958339	0.967404	not	113.272	89.9 - 135	1.85102	0.995089	0.95645	0.975772	not	not
YNL331C	AAD14	61.7813	NA	74.0014	NA	1.24864	1.07047	0.642076	0.711997	not	110.305	NA	1.85558	1.12822	0.43517	0.52525	not	176.802	158 - 200	2.9783	1.6011	0.0167611	0.0852526	not	not
YOL067C	RTG1	61.7952	43.3 - 84.2	30.0902	NA	0.483169	0.414226	0.00192362	0.0120944	repressed	45.2311	NA	0.745514	0.453285	0.000338458	0.00622666	repressed	86.8611	NA	1.41413	0.760224	0.0977989	0.225047	not	not
YML087C	AIM33	61.8702	51 - 73.8	82.5607	75.9 - 89.4	1.35194	1.15903	0.0813	0.137018	not	131.029	102 - 169	2.14112	1.30184	0.0235724	0.054352	not	101.677	82.2 - 124	1.65904	0.891881	0.237401	0.396206	not	not
YCR014C	POL4	62.2733	32.9 - 114	58.0737	45.4 - 73	0.968253	0.830094	0.318695	0.407184	not	77.6931	NA	1.29495	0.787354	0.225548	0.312595	not	90.1326	76.9 - 106	1.51581	0.814887	0.24415	0.402715	not	not
YKL163W	PIR3	62.2961	39.3 - 101	49.6306	37.3 - 66.9	0.783496	0.6717	0.03406	0.0712703	not	70.6603	59 - 85.4	1.13217	0.688377	0.0174393	0.0438191	not	120.646	103 - 140	1.94075	1.04333	0.687905	0.798111	not	not
YJL077W-B	YJL077W-B	62.4293	NA	90.4693	63.8 - 127	1.5121	1.29634	0.225382	0.30732	not	108.281	NA	1.8333	1.11468	0.55226	0.633844	not	115.726	NA	1.95537	1.05119	0.785937	0.869	not	reliable
YBR301W	PAU24	63.2727	52.8 - 73	75.4298	39.7 - 123	1.1599	0.994391	0.973987	0.981448	not	117.98	94.8 - 143	1.88407	1.14555	0.115679	0.182921	not	152.733	113 - 198	2.43474	1.30889	0.0153494	0.0833188	not	not
YGR146C-A	YGR146C-A	63.4779	59.4 - 68.3	80.4242	76.7 - 83.9	1.27327	1.09159	0.179567	0.256991	not	104.119	90.1 - 115	1.64755	1.00174	0.980164	0.984865	not	118.309	107 - 130	1.87273	1.00676	0.923152	0.954685	not	not
YLL055W	YCT1	63.6167	60.3 - 66.9	105.294	88.5 - 128	1.66649	1.4287	0.000938451	0.00960598	not	116.961	98.9 - 135	1.85043	1.12509	0.0921435	0.152862	not	167.52	152 - 184	2.65112	1.42522	0.000684346	0.0277848	not	not
YFR022W	ROG3	63.954	39.1 - 106	110.66	62.6 - 176	1.6856	1.44509	0.0746743	0.128533	not	155.385	144 - 170	2.43353	1.47963	0.0136297	0.0373326	not	139.772	96.5 - 202	2.16452	1.16362	0.328535	0.486569	not	not
YDR034W-B	YDR034W-B	64.2375	63 - 65.5	60.4327	45.3 - 79.7	0.930235	0.797501	0.0620706	0.111628	not	138.574	128 - 151	2.16016	1.31341	0.00354916	0.0158064	not	234.776	206 - 268	3.6648	1.97016	1.65949e-05	0.00789987	induced	not
YNL092W	YNL092W	64.2424	59.3 - 68	67.1102	61.9 - 74.6	1.04685	0.897477	0.0508997	0.095963	not	96.9629	84.9 - 111	1.51333	0.920133	0.136598	0.208697	not	95.6737	73.7 - 126	1.48816	0.800019	0.0178936	0.0875488	not	not
YGR006W	PRP18	64.2767	45.3 - 88.8	44.2409	29 - 66.2	0.703325	0.602968	0.00405366	0.017596	repressed	62.621	54.1 - 73	0.992982	0.60375	0.00403123	0.0170117	repressed	85.242	50 - 143	1.33662	0.718554	0.0608271	0.168428	not	not
YDL199C	YDL199C	64.4498	40.1 - 102	78.0387	77.9 - 77.9	1.21221	1.03924	0.721674	0.778818	not	116.217	115 - 118	1.80734	1.09889	0.396957	0.489254	not	109.078	88.7 - 133	1.69004	0.908549	0.435427	0.587494	not	not
YKL026C	GPX1	64.6293	47.3 - 83.6	57.1364	48.1 - 67.8	0.892268	0.764951	0.0505937	0.0955771	not	93.9693	74.8 - 117	1.46975	0.893634	0.350964	0.444182	not	133.607	102 - 170	2.10247	1.13027	0.2363	0.395488	not	not
YNL237W	YTP1	64.7492	53 - 80.1	64.2358	60.6 - 68.6	0.989021	0.847898	0.0433265	0.0852661	not	92.6504	70.2 - 120	1.41836	0.862384	0.169006	0.248091	not	69.9359	47.6 - 104	1.07216	0.57638	0.00126571	0.033345	repressed	not
YHR087W	RTC3	64.7908	60.2 - 69	72.4743	64.2 - 79.8	1.12095	0.961006	0.397139	0.485145	not	145.681	100 - 204	2.2272	1.35418	0.0240861	0.0551989	not	155.163	144 - 164	2.39907	1.28972	0.0026464	0.0433953	not	not
YFR017C	YFR017C	64.8646	31.2 - 120	41.001	28.3 - 55	0.656809	0.56309	0.0317297	0.0673112	not	87.1267	76.6 - 96.9	1.42494	0.866385	0.434619	0.525041	not	106.024	69.2 - 155	1.7085	0.918471	0.681749	0.7939	not	not
YER039C	HVG1	65.0654	53.7 - 76	81.0185	68.4 - 95.7	1.26095	1.08102	0.30853	0.396141	not	92.3468	83.2 - 103	1.43716	0.873819	0.105501	0.169568	not	108.418	75.9 - 159	1.67631	0.90117	0.32616	0.484317	not	not
YER065C	ICL1	65.2163	42.9 - 99.7	108.329	76.7 - 150	1.6602	1.4233	0.0157689	0.0411199	not	195.1	193 - 197	2.99443	1.82066	0.000717089	0.00771295	induced	207.624	190 - 227	3.18702	1.71331	0.00111554	0.0322848	induced	not
YIL089W	YIL089W	65.3365	39 - 107	73.5014	67.4 - 81	1.16299	0.997047	0.983599	0.987791	not	95.065	91.6 - 98.7	1.50996	0.918081	0.545428	0.627403	not	119.418	97 - 149	1.89722	1.01993	0.886485	0.933524	not	not
YOR083W	WHI5	65.5851	32.2 - 122	45.3294	38.7 - 54.1	0.728922	0.624912	0.0292997	0.0638856	not	56.8158	42.9 - 77.1	0.912184	0.554623	0.0139862	0.0379042	repressed	128.093	64.3 - 241	1.99134	1.07052	0.770585	0.855937	not	not
YPR002W	PDH1	65.6555	61.5 - 70.1	95.6807	77.1 - 119	1.44723	1.24072	0.0370143	0.0757465	not	140.664	80.2 - 222	2.09643	1.27466	0.125193	0.194691	not	169.967	158 - 182	2.59276	1.39384	0.000789096	0.0288883	not	not
YNL223W	ATG4	65.7759	55.3 - 77.3	70.6556	57.8 - 88.8	1.08771	0.932507	0.376334	0.464646	not	111.757	95.5 - 129	1.7204	1.04603	0.551273	0.632839	not	132.956	119 - 145	2.04299	1.09829	0.272076	0.430298	not	not
YLR174W	IDP2	66.3756	36.2 - 108	107.07	102 - 112	1.68517	1.44471	0.0450142	0.0878538	not	121.025	119 - 123	1.9051	1.15833	0.345697	0.439582	not	219.294	173 - 277	3.43747	1.84795	0.00760909	0.0634764	not	not
YOL038C-A	YOL038C-A	66.4147	NA	95.1864	NA	1.43176	1.22746	0.0123923	0.0349502	not	151.003	NA	2.27227	1.38158	0.0029229	0.0142394	not	156.394	NA	2.35277	1.26483	0.00980258	0.0696525	not	reliable
YBR117C	TKL2	66.6339	53.9 - 79.1	80.8252	62.9 - 105	1.23007	1.05455	0.537816	0.619571	not	83.1156	75.2 - 89.7	1.26165	0.767103	0.0224352	0.0525657	not	107.255	67.6 - 166	1.60628	0.863522	0.304434	0.463619	not	not
YIR015W	RPR2	66.8571	59.7 - 76.2	62.2545	47.4 - 81	0.932195	0.799181	0.00677698	0.0240016	not	80.3696	NA	1.1942	0.726095	0.0104854	0.03123	not	121.882	NA	1.82371	0.98041	0.726191	0.825084	not	not
YHR157W	REC104	67.2581	56.6 - 80.7	92.8687	81.5 - 104	1.3742	1.17812	0.0553184	0.102483	not	113.231	99.3 - 128	1.67934	1.02107	0.76501	0.816396	not	105.933	82 - 132	1.56753	0.842691	0.0767771	0.193086	not	not
YBR128C	ATG14	67.3845	59.7 - 73.2	37.7368	20.3 - 62.6	0.54344	0.465897	0.0040779	0.0176409	repressed	58.1762	50.2 - 66	0.870746	0.529428	6.02936e-05	0.0060363	repressed	101.012	87.8 - 116	1.50938	0.811426	0.0206406	0.0941477	not	not
YCR091W	KIN82	67.435	56.9 - 78.2	58.8866	55.6 - 62.1	0.880117	0.754534	0.0121092	0.0344615	not	93.4431	92.3 - 93.9	1.40144	0.852098	0.0659166	0.117499	not	94.8621	63.1 - 129	1.41606	0.761261	0.027076	0.107242	not	not
YHL016C	DUR3	67.6044	53.3 - 84.1	90.6676	79.4 - 103	1.36277	1.16832	0.0956911	0.156154	not	99.2685	67.3 - 145	1.46734	0.892169	0.418612	0.509505	not	109.005	94.1 - 130	1.63788	0.880508	0.164413	0.312999	not	not
YLR173W	YLR173W	67.6757	53.8 - 82.3	96.8265	80.9 - 117	1.44371	1.23771	0.0660189	0.117141	not	141.584	128 - 156	2.12546	1.29231	0.0186376	0.04598	not	150.244	147 - 155	2.25546	1.21251	0.0478278	0.147903	not	not
YIL150C	MCM10	67.8978	58.8 - 75	83.3994	68 - 101	1.22933	1.05392	0.555144	0.635607	not	147.606	143 - 154	2.19362	1.33376	0.0034933	0.015679	not	116.335	NA	1.72916	0.929577	0.258315	0.417255	not	not
YJL103C	GSM1	68.3282	63.5 - 72.3	75.9636	73.7 - 78.6	1.11161	0.952998	0.384277	0.47311	not	153.276	111 - 206	2.22441	1.35248	0.0211112	0.0501912	not	119.474	98.7 - 147	1.75132	0.941492	0.293656	0.452874	not	not
YJL077C	ICS3	68.414	61.6 - 75.8	57.9803	56.6 - 59.5	0.846979	0.726124	0.000986988	0.00978889	not	73.3475	54.4 - 101	1.07114	0.651271	0.00097789	0.00843132	repressed	163.797	153 - 177	2.39578	1.28795	0.0034189	0.0487913	not	not
YGL090W	LIF1	68.5196	49.3 - 95.7	90.9416	83.1 - 98.5	1.32681	1.13749	0.110505	0.174017	not	144.596	NA	2.10582	1.28038	0.0272209	0.0605195	not	133.593	NA	1.94926	1.0479	0.530274	0.669023	not	not
YDR070C	FMP16	68.9099	48.2 - 100	49.1467	45.5 - 52.6	0.712832	0.611119	0.0014731	0.0109521	repressed	78.074	66.5 - 89.4	1.1295	0.686754	0.00924519	0.0287618	not	92.8018	58.2 - 141	1.32621	0.712959	0.0483297	0.14884	not	not
YPL018W	CTF19	68.9204	54.1 - 88.7	67.5567	64.6 - 69.9	0.976784	0.837407	0.0445258	0.0871411	not	71.0285	70 - 72.6	1.03031	0.626447	0.00040402	0.00652961	repressed	129.257	118 - 142	1.87024	1.00542	0.944559	0.96777	not	not
YEL023C	YEL023C	69.1861	49.4 - 93.6	139.371	130 - 148	2.06132	1.76719	0.00141076	0.010903	induced	200.253	184 - 216	2.96245	1.80122	0.00121119	0.0091998	induced	135.436	127 - 144	2.00351	1.07707	0.469614	0.620199	not	not
YAL061W	BDH2	69.4926	65.6 - 72.3	52.1116	47.3 - 57.2	0.754261	0.646636	0.000215116	0.00626999	repressed	95.4577	70 - 128	1.36749	0.831456	0.114925	0.182026	not	134.18	101 - 184	1.92565	1.03521	0.730227	0.827025	not	not
YGR023W	MTL1	69.7487	45.9 - 106	82.8628	72.8 - 93	1.18403	1.01509	0.884138	0.909877	not	118.482	NA	1.69462	1.03035	0.790146	0.836904	not	193.441	168 - 222	2.7752	1.49192	0.00552159	0.0561962	not	not
YFL050C	ALR2	69.7563	50.6 - 89.1	111.098	91.5 - 136	1.62636	1.3943	0.0151652	0.0401189	not	146.352	117 - 179	2.14118	1.30187	0.0369663	0.0758091	not	147.787	121 - 177	2.16192	1.16222	0.165681	0.31446	not	not
YJL163C	YJL163C	69.8386	69.2 - 70.3	84.0776	71.1 - 102	1.20883	1.03635	0.501337	0.584531	not	138.488	126 - 154	1.98638	1.20775	0.020976	0.0499537	not	119.409	104 - 135	1.71124	0.919944	0.25524	0.413886	not	not
YAL016C-B	YAL016C-B	70.5924	49.3 - 96.9	121.041	80.4 - 169	1.6866	1.44594	0.0221692	0.0522673	not	119.219	58.9 - 233	1.64682	1.0013	0.993771	0.994827	not	193.425	184 - 204	2.74044	1.47323	0.00186888	0.0376827	not	not
YMR066W	SOV1	70.665	67.5 - 74.3	92.7855	78.3 - 109	1.308	1.12136	0.153651	0.226374	not	178.373	124 - 251	2.51908	1.53164	0.00239374	0.0126061	induced	156.379	125 - 196	2.21009	1.18812	0.0530116	0.1564	not	not
YPL257W	YPL257W	71.4311	51.3 - 103	80.3909	56.1 - 114	1.10437	0.946789	0.683356	0.747016	not	134.441	102 - 180	1.87828	1.14203	0.198142	0.282574	not	179.792	115 - 267	2.48715	1.33706	0.0542428	0.158798	not	not
YPR196W	YPR196W	71.5564	68.5 - 73.8	95.1032	94.9 - 94.9	1.3349	1.14443	0.0490465	0.0935605	not	141.132	130 - 153	1.98132	1.20467	0.0230415	0.0535646	not	152.717	136 - 171	2.14716	1.15429	0.0375052	0.127963	not	not
YKL093W	MBR1	72.5887	55.7 - 88.8	66.9066	42.3 - 102	0.933628	0.80041	0.080246	0.135646	not	112.577	112 - 113	1.57631	0.958422	0.615045	0.689882	not	152.701	147 - 159	2.13808	1.14941	0.132707	0.272399	not	not
YDR014W	RAD61	72.613	51.2 - 98.2	72.9451	72.7 - 72.7	1.02595	0.879554	0.255421	0.34024	not	117.21	90.9 - 148	1.65077	1.0037	0.973163	0.979222	not	129.27	115 - 144	1.82304	0.980046	0.842721	0.905588	not	not
YNL204C	SPS18	72.8525	60.5 - 87.2	89.3014	83.1 - 95.6	1.22244	1.04801	0.458375	0.543629	not	130.543	130 - 131	1.79205	1.0896	0.16196	0.239489	not	113.267	99.1 - 131	1.55539	0.836164	0.0153498	0.0833188	not	not
YDR216W	ADR1	73.1853	67.4 - 79.6	101.743	68.9 - 146	1.37017	1.17466	0.173538	0.250072	not	225.514	207 - 243	3.08778	1.87742	1.82536e-05	0.0060363	induced	242.683	149 - 405	3.26785	1.75676	0.00350163	0.0492224	induced	not
YOR077W	RTS2	73.433	54.3 - 98.6	86.6301	63.4 - 114	1.20336	1.03165	0.767227	0.818916	not	105.204	89.9 - 125	1.46177	0.888781	0.266387	0.357458	not	130.493	NA	1.79408	0.964482	0.784646	0.868145	not	not
YER015W	FAA2	73.955	48.8 - 112	81.6777	78.1 - 85.8	1.10406	0.946522	0.589309	0.666759	not	100.531	86 - 115	1.35638	0.8247	0.121976	0.190644	not	206.909	121 - 338	2.74933	1.47801	0.0417747	0.136457	not	not
YGR088W	CTT1	74.0203	66.1 - 83.3	122.642	93.2 - 155	1.64164	1.4074	0.00802352	0.0264616	not	171.512	159 - 184	2.31713	1.40886	0.000976861	0.00843132	not	174.936	143 - 211	2.36352	1.2706	0.00612139	0.0583855	not	not
YOR018W	ROD1	74.074	NA	139.188	127 - 153	1.88183	1.61332	0.000224464	0.00628499	induced	214.674	195 - 237	2.91213	1.77062	3.98846e-05	0.0060363	induced	188.538	NA	2.53927	1.36509	0.0125959	0.0771024	not	not
YFL030W	AGX1	74.4202	59.8 - 92.9	88.4654	61.9 - 129	1.18597	1.01675	0.843707	0.878176	not	124.47	109 - 143	1.67266	1.01701	0.782072	0.829662	not	169.388	139 - 208	2.27214	1.22148	0.0256664	0.104213	not	not
YHR140W	YHR140W	74.5547	70.5 - 77.9	71.9715	57.7 - 87.9	0.97175	0.833092	0.0178345	0.0446335	not	90.7194	88.5 - 94.1	1.22464	0.744599	0.00179948	0.0110749	not	72.5174	57 - 92.4	0.973829	0.523521	0.000255602	0.0191316	repressed	not
YLR205C	HMX1	74.9066	72.1 - 77	67.0808	61.9 - 73.9	0.898299	0.770121	0.00140205	0.0108928	not	65.1904	62.9 - 67.4	0.872615	0.530565	2.9605e-05	0.0060363	repressed	113.266	82.4 - 156	1.51019	0.811866	0.0350034	0.123121	not	not
YBR050C	REG2	75.0495	73.5 - 75.8	77.265	57.3 - 104	1.01809	0.872822	0.234917	0.317869	not	138.087	91.4 - 198	1.82447	1.10931	0.359268	0.452768	not	142.261	95.7 - 202	1.89319	1.01776	0.836844	0.902036	not	not
YPL147W	PXA1	75.052	61.3 - 90.3	121.24	118 - 124	1.63763	1.40395	0.00625754	0.0227605	not	174.39	153 - 204	2.35998	1.43491	0.00465397	0.0186517	not	176.146	174 - 179	2.38396	1.28159	0.0191424	0.090602	not	not
YMR232W	FUS2	75.1153	66 - 84.1	97.9977	91.2 - 106	1.31316	1.12579	0.137769	0.207268	not	111.415	83 - 150	1.48564	0.903291	0.326407	0.419486	not	135.505	109 - 173	1.81336	0.974844	0.770475	0.855937	not	not
YDR042C	YDR042C	75.7171	65.8 - 85.4	77.0754	73.9 - 79.5	1.01808	0.872813	0.0306179	0.065796	not	86.1969	77.1 - 94.3	1.13991	0.693083	0.000385093	0.00644403	not	135.412	101 - 189	1.77435	0.953873	0.629293	0.749865	not	not
YJR119C	JHD2	75.7415	70 - 82.1	110.233	69.3 - 167	1.42845	1.22463	0.137616	0.20712	not	147.89	116 - 184	1.94469	1.1824	0.0812435	0.138784	not	142.817	125 - 169	1.88525	1.01349	0.839266	0.903776	not	not
YDL204W	RTN2	75.7693	73.6 - 76.3	59.0249	55 - 62.8	0.781763	0.670214	0.000223205	0.00628083	not	113.463	96.6 - 131	1.50416	0.914556	0.136014	0.208013	not	126.794	114 - 139	1.67632	0.901175	0.160998	0.308365	not	not
YHR210C	YHR210C	75.7693	73.9 - 76.2	52.4501	47.2 - 57.9	0.695049	0.595873	4.98795e-05	0.00626999	repressed	101.024	97.2 - 104	1.33848	0.81382	0.00809422	0.0262958	not	141.595	137 - 147	1.87644	1.00876	0.86867	0.924089	not	not
YPL278C	YPL278C	75.8005	72.1 - 78.9	146.743	142 - 151	1.9461	1.66842	0.000139656	0.00626999	induced	166.493	137 - 202	2.20048	1.33793	0.010604	0.0314656	not	220.607	172 - 285	2.92164	1.57065	0.000926686	0.0310138	induced	not
YGR131W	FHN1	75.8355	66.2 - 83.8	97.0372	76.8 - 123	1.29161	1.10731	0.205804	0.285931	not	114.167	102 - 127	1.51708	0.922408	0.299786	0.393044	not	112.022	104 - 122	1.49205	0.802112	0.0117857	0.0749505	not	reliable
YAL068C	PAU8	76.6285	75.1 - 77.4	157.371	77.1 - 302	1.98122	1.69852	0.0194707	0.0473051	induced	304.86	284 - 325	3.99187	2.42712	5.86262e-06	0.0060363	induced	247.112	224 - 274	3.23817	1.74081	4.86757e-05	0.00888096	induced	reliable
YDL246C	SOR2	76.7625	65.4 - 90.4	88.7823	81.1 - 97.2	1.1572	0.992084	0.874573	0.902662	not	143.003	140 - 147	1.86418	1.13345	0.0511899	0.0968212	not	168.074	147 - 191	2.1872	1.17582	0.039181	0.131129	not	reliable
YBR108W	AIM3	76.948	47.1 - 120	85.9792	76 - 97.4	1.15691	0.991834	0.949454	0.963076	not	126.043	95.3 - 160	1.68258	1.02304	0.878452	0.903861	not	144.067	143 - 145	1.93848	1.04211	0.748903	0.840936	not	not
YDL220C	CDC13	77.0473	72.9 - 80.9	84.3486	80.8 - 87.1	1.09536	0.939065	0.26373	0.3486	not	117.989	107 - 132	1.53272	0.931921	0.267193	0.358284	not	124.963	93.3 - 164	1.61277	0.867009	0.165863	0.314595	not	not
YDR106W	ARP10	77.1058	70.3 - 83.8	88.9865	58.9 - 138	1.13915	0.976606	0.855066	0.88706	not	137.101	121 - 155	1.79391	1.09073	0.20394	0.289238	not	115.932	52.4 - 239	1.47098	0.790783	0.196398	0.349429	not	not
YEL039C	CYC7	77.3619	58.1 - 105	70.963	68.9 - 72.7	0.915299	0.784696	0.0184079	0.0454766	not	170.308	170 - 170	2.2011	1.33831	0.00755025	0.0251064	not	190.941	181 - 199	2.46675	1.3261	0.00920284	0.0680408	not	not
YJL127C	SPT10	77.4173	67.1 - 89	66.6249	50.8 - 81.6	0.851142	0.729694	0.0149828	0.0397666	not	117.178	63.7 - 205	1.48625	0.903663	0.480081	0.5683	not	121.868	115 - 129	1.57344	0.845864	0.0300465	0.112844	not	not
YBR298C	MAL31	77.4194	65.1 - 93.2	92.8846	87.9 - 98.5	1.19971	1.02852	0.58599	0.66369	not	146.319	107 - 196	1.87321	1.13895	0.213474	0.299829	not	144.713	108 - 185	1.86667	1.0035	0.958009	0.976306	not	not
YOL059W	GPD2	77.4982	NA	105.585	NA	1.36306	1.16856	0.0611103	0.110428	not	104.965	NA	1.35405	0.823284	0.0169016	0.043003	not	114.491	NA	1.47937	0.795297	0.00441777	0.0515194	not	not
YAR020C	PAU7	77.7521	65.3 - 90.9	66.7751	46.4 - 94.9	0.86832	0.74442	0.0143085	0.0384459	not	98.2857	78.6 - 120	1.27258	0.773749	0.0321486	0.0682974	not	133.621	90.8 - 195	1.73012	0.930093	0.470854	0.621073	not	not
YOL083W	ATG34	78.0919	61.3 - 94.6	91.8713	88.1 - 96.1	1.19363	1.02331	0.773344	0.823891	not	177.801	143 - 220	2.30055	1.39877	0.0137035	0.037425	not	178.017	154 - 207	2.31343	1.24368	0.0359486	0.125192	not	not
YKL055C	OAR1	78.4338	64.5 - 92.3	74.0521	63.4 - 88	0.950373	0.814765	0.075768	0.129744	not	81.2669	72.8 - 94	1.05125	0.639175	0.00131802	0.00961186	repressed	136.671	125 - 149	1.76803	0.950475	0.514137	0.656128	not	not
YOR030W	DFG16	78.5192	55.8 - 108	100.975	91.4 - 113	1.31072	1.1237	0.302405	0.388904	not	154.348	150 - 159	2.01119	1.22284	0.0862648	0.145254	not	144.078	127 - 160	1.87739	1.00927	0.926823	0.95659	not	not
YGR288W	MAL13	79.0988	65.9 - 95.2	52.5882	39.6 - 67.9	0.665025	0.570133	0.000114621	0.00626999	repressed	93.8905	80.6 - 111	1.1831	0.719344	0.00416148	0.0173068	not	153.907	117 - 196	1.93458	1.04001	0.656614	0.773921	not	not
YBL066C	SEF1	80.0085	75.6 - 82.9	123.424	92.1 - 160	1.54604	1.32544	0.00520523	0.0203913	not	116.006	78.9 - 169	1.44821	0.880538	0.158512	0.235436	not	139.153	112 - 169	1.7424	0.936698	0.291302	0.450534	not	not
YPR156C	TPO3	80.0644	75.1 - 84.6	117.839	61.5 - 206	1.43378	1.22919	0.224031	0.305845	not	158.765	130 - 194	1.99609	1.21366	0.0271475	0.06038	not	229.305	129 - 412	2.82743	1.52	0.0219171	0.0968463	not	not
YMR169C	ALD3	80.0819	76.4 - 84.6	72.9194	69.5 - 76.9	0.910453	0.780541	0.00485725	0.0195535	not	84.3742	61.2 - 114	1.04672	0.636424	0.00314055	0.0148272	repressed	118.86	99.7 - 139	1.4836	0.797567	0.0168771	0.0853818	not	not
YKR017C	YKR017C	80.1215	78.9 - 81.4	112.542	110 - 114	1.40937	1.20827	0.0115364	0.033359	not	143.442	106 - 189	1.79474	1.09123	0.266839	0.357895	not	174.267	145 - 210	2.17828	1.17102	0.0672997	0.179212	not	not
YPL113C	YPL113C	80.1306	64.6 - 96.8	65.9911	53.5 - 79.5	0.825972	0.708115	0.0168559	0.0428289	not	94.8684	46.9 - 176	1.15628	0.703035	0.0950646	0.156897	not	134.187	118 - 153	1.69382	0.910582	0.304014	0.463229	not	not
YGL075C	MPS2	80.1306	64.4 - 97.3	100.091	82.2 - 120	1.25692	1.07757	0.450456	0.53694	not	132.433	113 - 151	1.67016	1.01549	0.86298	0.89151	not	184.786	181 - 191	2.33856	1.25719	0.0202157	0.0930348	not	not
YLR411W	CTR3	82.9641	71.6 - 95.3	87.4093	87.2 - 87.2	1.0525	0.90232	0.0975842	0.158648	not	120.39	116 - 125	1.45138	0.882466	0.0582585	0.106672	not	200.85	169 - 235	2.42004	1.30099	0.00449304	0.052182	not	not
YPL119C	DBP1	83.3979	74.1 - 92.7	87.9131	56.8 - 132	1.05115	0.901162	0.278892	0.363737	not	130.291	124 - 138	1.56264	0.950114	0.382764	0.476224	not	123.131	84.3 - 176	1.46969	0.790092	0.0300273	0.112844	not	not
YIL120W	QDR1	83.6559	62.4 - 108	102.192	88.3 - 118	1.24678	1.06888	0.490639	0.574784	not	121.192	116 - 127	1.47856	0.89899	0.284286	0.376298	not	169.951	133 - 222	2.06152	1.10825	0.383531	0.539213	not	not
YJR151C	DAN4	84.2194	70 - 100	145.309	135 - 154	1.72166	1.47599	0.000752892	0.00892737	not	249.835	158 - 395	2.9168	1.77347	0.00360826	0.015969	induced	244.021	221 - 265	2.8981	1.55799	0.000239473	0.0191316	induced	not
YPL264C	YPL264C	84.2641	77.5 - 91	74.4578	68.1 - 80.4	0.885141	0.758841	0.0010208	0.00984617	not	91.4616	77.7 - 107	1.08771	0.661345	0.000240338	0.0060363	repressed	172.458	155 - 194	2.05082	1.1025	0.0878062	0.210794	not	not
YLR318W	EST2	84.3047	83.9 - 83.9	168.869	163 - 175	2.00914	1.72246	6.15693e-05	0.00626999	induced	198.798	175 - 223	2.36941	1.44064	0.000473836	0.00673898	not	257.598	233 - 281	3.0694	1.65008	8.20846e-05	0.0113237	induced	reliable
YOR009W	TIR4	84.3702	72.5 - 97.8	144.592	134 - 156	1.72801	1.48144	0.00174064	0.011601	not	207.246	188 - 231	2.48389	1.51025	0.00103016	0.0086484	induced	236.58	209 - 267	2.83123	1.52204	0.00130557	0.0334131	induced	not
YIL066C	RNR3	85.0251	60.7 - 118	99.9891	69.4 - 148	1.17277	1.00543	0.957445	0.968639	not	165.858	148 - 185	1.95102	1.18625	0.068587	0.12119	not	150.27	107 - 206	1.76036	0.946352	0.57263	0.704852	not	not
YGR110W	CLD1	85.0251	61.3 - 114	105.879	78.6 - 138	1.22986	1.05437	0.642584	0.712359	not	199.049	167 - 232	2.34102	1.42338	0.00458241	0.0184733	not	194.683	156 - 232	2.28637	1.22913	0.0472611	0.146792	not	not
YJR152W	DAL5	85.209	75.3 - 95.7	150.181	96.5 - 223	1.74466	1.49571	0.0166186	0.0424548	not	185.665	174 - 196	2.19962	1.33741	0.00354265	0.0157914	not	172.447	168 - 178	2.04318	1.09839	0.165234	0.31413	not	not
YBR297W	MAL33	85.209	74.9 - 95.2	77.6981	49.6 - 116	0.901345	0.772733	0.0835611	0.139995	not	130.057	93.6 - 174	1.52603	0.927852	0.477238	0.565407	not	176.167	152 - 206	2.08529	1.12103	0.13123	0.270311	not	not
YDR034C-A	YDR034C-A	85.2176	77 - 92.9	56.0607	47 - 65.9	0.652957	0.559787	0.000526442	0.00767459	repressed	54.0959	28.9 - 97.4	0.624911	0.379956	0.000410205	0.00654862	repressed	195.305	159 - 242	2.29273	1.23255	0.0132344	0.078388	not	reliable
YLR346C	YLR346C	85.8025	72.5 - 102	77.5869	56.2 - 107	0.9033	0.774409	0.0134627	0.0368207	not	119.083	66.6 - 211	1.35318	0.822758	0.219753	0.306214	not	127.595	102 - 161	1.47749	0.794283	0.0393927	0.131224	not	reliable
YLR035C	MLH2	85.951	75 - 96.5	116.053	90.4 - 145	1.33963	1.14848	0.134818	0.203904	not	174.857	143 - 210	2.02594	1.2318	0.0331842	0.0699552	not	248.902	201 - 310	2.88918	1.55319	0.000807146	0.0292642	induced	not
YDL057W	YDL057W	85.9978	83.9 - 86.5	103.075	78.6 - 133	1.20251	1.03093	0.612288	0.686462	not	155.452	143 - 168	1.81446	1.10322	0.0848739	0.143383	not	163.84	128 - 208	1.90669	1.02502	0.718903	0.819695	not	not
YHR184W	SSP1	86.7536	66.6 - 111	86.6505	45.9 - 154	0.961922	0.824666	0.28426	0.369263	not	135.411	131 - 140	1.55904	0.947924	0.470996	0.55982	not	158.92	102 - 228	1.81731	0.97697	0.823349	0.892119	not	not
YGR016W	YGR016W	86.7536	66.7 - 111	86.9145	77.9 - 93.9	0.997757	0.855388	0.0829874	0.139405	not	114.167	103 - 125	1.31293	0.798282	0.024995	0.056809	not	141.631	NA	1.62615	0.874201	0.162586	0.310671	not	not
YLR315W	NKP2	87.0057	65.1 - 117	77.4066	60.4 - 96.8	0.906655	0.777286	0.0348636	0.0725491	not	93.4957	69.7 - 122	1.09353	0.664883	0.00626106	0.0223839	repressed	255.128	234 - 277	2.9883	1.60648	0.00187099	0.0376827	induced	not
YJL170C	ASG7	87.0057	65.2 - 114	95.9869	88 - 105	1.12413	0.96373	0.681718	0.745369	not	159.532	92 - 256	1.82	1.10659	0.548436	0.630095	not	240.316	223 - 260	2.81524	1.51344	0.0034247	0.0487913	induced	not
YDL239C	ADY3	87.1159	56.7 - 139	103.994	93.6 - 115	1.22879	1.05345	0.690988	0.753612	not	152.742	136 - 173	1.80733	1.09889	0.480352	0.568502	not	192.186	187 - 198	2.27958	1.22548	0.139124	0.281231	not	not
YBR219C	YBR219C	88.5086	78.6 - 99.2	105.387	91.2 - 120	1.19226	1.02214	0.666225	0.731399	not	131.627	104 - 163	1.4869	0.904058	0.157643	0.234454	not	138.014	114 - 166	1.55946	0.838349	0.0214672	0.0956804	not	not
YKL222C	YKL222C	88.5521	84.2 - 91.7	145.476	144 - 147	1.6452	1.41045	0.0004288	0.00723738	not	199.014	165 - 241	2.24064	1.36235	0.00720441	0.0244762	not	169.932	119 - 236	1.90644	1.02488	0.799356	0.877724	not	not
YLL060C	GTT2	88.576	87.4 - 90	147.211	133 - 161	1.66364	1.42626	0.00100354	0.00979555	not	181.918	180 - 184	2.06177	1.25359	0.00476881	0.0189413	not	216.844	194 - 242	2.45604	1.32034	0.00264417	0.0433953	not	reliable
YNL200C	YNL200C	88.7762	58.7 - 126	130.781	130 - 132	1.51174	1.29603	0.0528666	0.0989128	not	208.953	187 - 237	2.41761	1.46995	0.0126925	0.0357336	not	200.817	194 - 209	2.32302	1.24883	0.0820825	0.202161	not	not
YOL152W	FRE7	88.8122	56.3 - 133	77.5449	70 - 85.5	0.897457	0.7694	0.0800665	0.135383	not	130.726	110 - 152	1.51368	0.920341	0.534277	0.616331	not	173.652	147 - 211	2.01111	1.08115	0.557979	0.692437	not	not
YHL006C	SHU1	88.8179	55.7 - 132	77.9914	75.1 - 80.8	0.904186	0.775168	0.0798193	0.135086	not	130.86	104 - 164	1.51177	0.919182	0.54523	0.627303	not	156.369	112 - 209	1.80113	0.968267	0.825312	0.893733	not	not
YDL216C	RRI1	88.8784	65 - 122	92.6367	86.8 - 98.6	1.03869	0.890484	0.191227	0.270327	not	152.893	NA	1.72048	1.04608	0.55386	0.635293	not	174.281	NA	1.95857	1.05291	0.525945	0.665789	not	not
YBL106C	SRO77	89.2537	54.7 - 141	147.127	129 - 164	1.64536	1.41059	0.0187705	0.0460296	not	187.906	166 - 209	2.10446	1.27955	0.0610808	0.110835	not	163.861	102 - 254	1.82295	0.98	0.879565	0.928831	not	not
YPL272C	YPL272C	89.3556	79.3 - 98.2	121.115	112 - 130	1.36315	1.16864	0.0565773	0.104303	not	165.071	152 - 181	1.86056	1.13125	0.113871	0.180725	not	177.394	161 - 196	2.00262	1.07659	0.260464	0.419113	not	not
YML042W	CAT2	89.4199	88.4 - 90.6	94.9367	86.2 - 103	1.06096	0.909571	0.159415	0.233045	not	130.509	117 - 142	1.46107	0.888356	0.0946503	0.156396	not	170.009	136 - 215	1.90271	1.02288	0.736449	0.832239	not	not
YER033C	ZRG8	89.4688	81.8 - 95.2	158.352	153 - 163	1.78191	1.52765	0.000304009	0.00670305	induced	209.922	188 - 232	2.35903	1.43433	0.001684	0.010799	not	193.43	177 - 209	2.17806	1.1709	0.0288355	0.109979	not	not
YDL104C	QRI7	90.2197	78.1 - 104	117.654	105 - 131	1.29884	1.11351	0.14967	0.221895	not	212.28	178 - 251	2.34426	1.42535	0.00322071	0.0150944	not	196.482	170 - 231	2.17471	1.1691	0.0493026	0.150683	not	not
YDR160W	SSY1	90.4482	65.5 - 126	127.847	70.4 - 218	1.3997	1.19997	0.311431	0.399061	not	190.015	175 - 205	2.1468	1.30529	0.0312627	0.0668767	not	157.705	84.2 - 273	1.7522	0.941965	0.692357	0.801054	not	not
YJL108C	PRM10	90.7667	85 - 95.8	137.46	95.9 - 189	1.52084	1.30383	0.0165422	0.0423936	not	223.405	205 - 245	2.4731	1.50368	0.000758957	0.00772061	induced	210.68	194 - 227	2.335	1.25527	0.00753466	0.0629483	not	not
YDR453C	TSA2	91.2586	71.2 - 115	103.344	81.9 - 128	1.13944	0.976857	0.825489	0.864206	not	143.508	134 - 152	1.59745	0.971274	0.720718	0.781215	not	169.974	166 - 173	1.89178	1.017	0.834653	0.900743	not	reliable
YJL132W	YJL132W	91.3935	55.8 - 147	152.465	150 - 155	1.66975	1.4315	0.0134464	0.0367961	not	191.737	184 - 200	2.10085	1.27735	0.0566578	0.104353	not	213.766	199 - 231	2.34358	1.25988	0.063208	0.172458	not	reliable
YDL244W	THI13	91.6364	79.1 - 105	61.8552	41.5 - 87.5	0.665261	0.570336	0.00562984	0.0214346	repressed	78.9901	70.9 - 86.6	0.867248	0.527301	0.000157896	0.0060363	repressed	190.315	167 - 218	2.09186	1.12456	0.133496	0.27347	not	not
YPR193C	HPA2	91.9768	87 - 96.4	110.836	51.8 - 228	1.14769	0.983929	0.932712	0.949329	not	154.783	149 - 162	1.68548	1.0248	0.649322	0.721951	not	184.876	93.2 - 363	1.96511	1.05642	0.714308	0.816022	not	not
YJR011C	YJR011C	91.9768	87.2 - 95.9	123.392	119 - 127	1.34371	1.15198	0.0216124	0.051318	not	161.876	142 - 185	1.75943	1.06976	0.314919	0.407865	not	221.806	212 - 232	2.41786	1.29982	0.00141276	0.0342943	not	reliable
YBR132C	AGP2	92.024	85.9 - 97.1	184.29	149 - 224	2.00035	1.71492	0.000494211	0.00749572	induced	281.455	235 - 338	3.06477	1.86343	0.000169569	0.0060363	induced	130.487	NA	1.41909	0.762889	0.0146921	0.0814778	not	not
YGR188C	BUB1	92.1271	70.1 - 119	132.983	115 - 153	1.46065	1.25223	0.0543929	0.101199	not	172.349	161 - 186	1.90326	1.15721	0.127424	0.197455	not	144.067	144 - 144	1.59075	0.855172	0.103592	0.23359	not	not
YKR053C	YSR3	92.1624	65.1 - 126	95.2351	54.9 - 161	1.04603	0.896777	0.443833	0.530386	not	140.647	130 - 151	1.55832	0.947482	0.577253	0.656931	not	160.754	128 - 201	1.77615	0.954842	0.663616	0.778716	not	not
YOR173W	DCS2	92.5341	86.5 - 98.5	109.085	99.7 - 119	1.18231	1.01361	0.829334	0.867366	not	165.756	104 - 256	1.76646	1.07404	0.594891	0.672806	not	184.217	148 - 228	1.99585	1.07295	0.370103	0.525955	not	not
YGL168W	HUR1	92.7213	64.5 - 134	112.1	103 - 119	1.20629	1.03416	0.710826	0.77005	not	127.717	69.6 - 228	1.35653	0.824793	0.222216	0.308788	not	183.513	136 - 248	1.96652	1.05718	0.62341	0.744826	not	not
YMR303C	ADH2	92.7773	77.3 - 110	100.456	76.6 - 129	1.08209	0.927684	0.315032	0.403163	not	144.512	112 - 181	1.55532	0.94566	0.450454	0.54001	not	220.586	195 - 250	2.3769	1.2778	0.00614345	0.0584973	not	not
YGR053C	YGR053C	92.7884	78.8 - 108	88.0177	70.4 - 107	0.94057	0.806361	0.041423	0.0822642	not	128.552	106 - 151	1.38037	0.839288	0.0532382	0.09974	not	169.332	135 - 211	1.81874	0.977735	0.768006	0.854246	not	not
YEL030W	ECM10	92.9198	85.6 - 101	112.257	87.3 - 145	1.21546	1.04203	0.560175	0.6402	not	142.22	121 - 165	1.54105	0.936983	0.290473	0.382875	not	187.856	175 - 202	2.03416	1.09354	0.170622	0.320177	not	reliable
YDR273W	DON1	93.6555	69.2 - 125	92.3952	80.6 - 106	0.986536	0.845768	0.0528502	0.0989128	not	101.149	79.5 - 130	1.07858	0.655792	0.00219273	0.0120936	repressed	132.962	132 - 135	1.41835	0.762492	0.0108174	0.0724065	not	not
YPR026W	ATH1	93.7608	84.5 - 104	169.077	164 - 173	1.81636	1.55718	0.000282491	0.00660363	induced	218.421	191 - 251	2.34795	1.42759	0.00118922	0.00912653	not	207	198 - 217	2.2255	1.19641	0.0188146	0.0898685	not	not
YDR263C	DIN7	94.1028	85.1 - 103	129.446	113 - 150	1.37787	1.18126	0.014349	0.0385366	not	173.637	171 - 175	1.84763	1.12339	0.0551334	0.102241	not	172.429	154 - 192	1.83255	0.985162	0.79901	0.877514	not	not
YKL162C	YKL162C	94.4265	66.6 - 135	102.742	94.4 - 110	1.08827	0.932985	0.398557	0.486666	not	144.377	130 - 159	1.52602	0.927847	0.41327	0.504414	not	198.323	162 - 242	2.09348	1.12543	0.244005	0.402715	not	not
YDR252W	BTT1	94.5582	94.3 - 94.3	114.383	71.1 - 171	1.20685	1.03465	0.723507	0.780647	not	149.699	97.7 - 224	1.57605	0.958265	0.663615	0.734234	not	216.892	182 - 256	2.2979	1.23533	0.00997429	0.0702348	not	reliable
YLR408C	BLS1	94.6293	83.1 - 107	95.0719	64.7 - 140	0.996647	0.854436	0.209454	0.290218	not	158.295	131 - 189	1.68105	1.02211	0.785301	0.832552	not	304.497	269 - 347	3.2443	1.7441	0.000168467	0.0180177	induced	reliable
YLR142W	PUT1	94.9139	79.5 - 111	122.975	106 - 142	1.28937	1.10539	0.203712	0.283932	not	185.949	154 - 220	1.95155	1.18658	0.06355	0.11418	not	289.641	268 - 314	3.05026	1.63979	0.000208272	0.0187657	induced	not
YJL106W	IME2	95.4036	92.8 - 97.5	168.009	129 - 218	1.76312	1.51154	0.000961467	0.00966535	induced	198.679	153 - 252	2.07131	1.25939	0.0352904	0.0729541	not	147.787	119 - 176	1.55148	0.834058	0.0146381	0.0814532	not	not
YNL214W	PEX17	95.4266	95.1 - 95.1	101.141	98.6 - 104	1.06198	0.91045	0.10717	0.169982	not	163.984	152 - 177	1.72519	1.04894	0.356304	0.449532	not	202.059	199 - 206	2.12574	1.14278	0.0284796	0.109494	not	not
YDR366C	YDR366C	95.4399	91.9 - 99.2	118.964	105 - 134	1.24331	1.0659	0.343667	0.432913	not	87.7966	84.4 - 89.8	0.921819	0.560481	3.25466e-05	0.0060363	repressed	138.536	129 - 152	1.45288	0.781054	0.00499687	0.0544053	not	reliable
YGL180W	ATG1	95.4736	85.6 - 105	133.932	90.6 - 199	1.40757	1.20672	0.0878849	0.146156	not	176.898	154 - 201	1.86121	1.13165	0.130531	0.201387	not	186.022	178 - 195	1.96364	1.05563	0.357586	0.516209	not	not
YMR167W	MLH1	95.4736	86.9 - 105	136.268	129 - 142	1.43778	1.23262	0.00902892	0.0285294	not	211.461	187 - 235	2.22644	1.35371	0.00468741	0.0187364	not	218.086	205 - 233	2.30091	1.23695	0.0108668	0.0724996	not	not
YML095C	RAD10	95.4978	80.9 - 111	66.3668	41 - 100	0.682095	0.584767	0.0108513	0.0319994	repressed	117.183	NA	1.22119	0.742505	0.0457466	0.0886408	not	194.688	NA	2.05434	1.10439	0.235372	0.394683	not	not
YML058W-A	HUG1	96.1659	71.4 - 132	82.524	77.1 - 88.9	0.857713	0.735327	0.00462711	0.0189782	not	94.5217	80.5 - 112	0.98259	0.597432	0.000527792	0.00697722	repressed	128.037	97.9 - 165	1.32129	0.710313	0.0150622	0.0823906	not	reliable
YLR164W	YLR164W	96.4393	69.7 - 130	98.7308	88.3 - 108	1.04344	0.894555	0.245781	0.33002	not	133.907	123 - 146	1.41542	0.860602	0.138265	0.210902	not	201.468	166 - 240	2.12648	1.14317	0.197686	0.351165	not	reliable
YDR076W	RAD55	96.5287	60.2 - 139	101.909	76.3 - 133	1.07912	0.925142	0.608527	0.683581	not	172.922	61.8 - 454	1.74911	1.06349	0.810137	0.852432	not	168.786	123 - 229	1.79902	0.967134	0.814387	0.886395	not	not
YER060W-A	FCY22	96.5394	61.9 - 154	69.7634	64.7 - 75.3	0.7233	0.620093	0.00257147	0.0140352	repressed	76.3323	67 - 88.9	0.791944	0.481515	0.000337066	0.00622666	repressed	103.635	93.8 - 115	1.07504	0.577929	0.00126686	0.033345	repressed	not
YLR266C	PDR8	97.3122	69.6 - 130	118.98	118 - 120	1.24888	1.07068	0.5039	0.586794	not	143.809	142 - 147	1.51128	0.918886	0.412338	0.503711	not	212.575	174 - 257	2.23075	1.19923	0.123461	0.260792	not	reliable
YHL036W	MUP3	97.728	75.7 - 120	138.945	121 - 162	1.44258	1.23674	0.0342203	0.0715528	not	180.263	143 - 230	1.86789	1.13571	0.194104	0.277655	not	227.373	198 - 261	2.35913	1.26824	0.0228056	0.0985948	not	reliable
YHR048W	YHK8	97.8677	70.2 - 140	124.333	97 - 156	1.27016	1.08892	0.351509	0.440145	not	115.291	91.9 - 145	1.17025	0.711532	0.0164314	0.0421747	not	166.931	123 - 223	1.69876	0.913234	0.37571	0.530511	not	reliable
YIR007W	YIR007W	97.9023	76.6 - 129	127.82	110 - 150	1.30556	1.11927	0.142487	0.213216	not	200.403	187 - 216	2.04355	1.24251	0.0239781	0.0549961	not	170.015	132 - 229	1.72973	0.929885	0.417718	0.571231	not	not
YHR159W	YHR159W	98.3353	77.9 - 124	126.376	88.4 - 174	1.28118	1.09837	0.323949	0.41267	not	169.171	131 - 219	1.7173	1.04415	0.576795	0.656633	not	163.195	156 - 169	1.6597	0.892237	0.100275	0.228232	not	not
YDR285W	ZIP1	98.4091	94.8 - 101	134.075	133 - 134	1.36423	1.16957	0.0159888	0.0414829	not	170.643	159 - 183	1.73865	1.05713	0.278324	0.370052	not	203.307	181 - 228	2.07077	1.11323	0.0685614	0.180869	not	not
YDR501W	PLM2	98.4275	96.9 - 99.2	100.591	97.2 - 104	1.02446	0.87828	0.0294967	0.0641965	not	147.556	135 - 163	1.50414	0.91454	0.112094	0.178191	not	179.837	168 - 193	1.8318	0.984758	0.771282	0.856375	not	not
YGR243W	FMP43	98.7647	80.8 - 122	110.816	90.2 - 132	1.11429	0.955291	0.580987	0.659587	not	164.484	93.5 - 280	1.62178	0.986069	0.926395	0.941036	not	234.038	135 - 380	2.32021	1.24732	0.154481	0.300876	not	reliable
YOR180C	DCI1	98.8092	89.7 - 108	107.429	101 - 115	1.08836	0.93306	0.183294	0.261136	not	123.968	NA	1.25599	0.763664	0.00185388	0.0112265	not	193.377	144 - 257	1.94706	1.04672	0.596629	0.723218	not	not
YNL187W	SWT21	99.1048	59.2 - 148	134.334	114 - 157	1.39583	1.19666	0.222308	0.304081	not	214.471	161 - 285	2.22163	1.35079	0.0826445	0.14071	not	199.581	191 - 208	2.08374	1.1202	0.393197	0.548845	not	reliable
YAL028W	FRT2	99.5457	67.5 - 152	123.142	114 - 133	1.23441	1.05827	0.548978	0.629438	not	173.453	154 - 196	1.74398	1.06037	0.521095	0.604701	not	208.226	206 - 209	2.09366	1.12553	0.209448	0.365742	not	not
YER162C	RAD4	100.159	95.7 - 104	148.927	119 - 189	1.49332	1.28024	0.00654845	0.0234121	not	212.031	195 - 232	2.12712	1.29332	0.00228853	0.0123205	not	201.422	182 - 225	2.01814	1.08493	0.193341	0.346056	not	not
YJR149W	YJR149W	100.395	65 - 149	174.014	160 - 189	1.79026	1.53481	0.0128608	0.0356222	induced	214.036	170 - 271	2.18923	1.33109	0.0782729	0.13489	not	176.749	161 - 194	1.81635	0.976451	0.850601	0.911174	not	not
YLR320W	MMS22	100.592	95 - 105	162.974	112 - 232	1.60185	1.37328	0.0252168	0.0574874	not	215.81	197 - 234	2.15212	1.30852	0.00462446	0.0186031	not	224.258	215 - 232	2.24025	1.20433	0.0108887	0.0725401	not	reliable
YPL222W	FMP40	100.906	82.3 - 124	146.251	132 - 165	1.44948	1.24266	0.0121493	0.034496	not	186.016	186 - 186	1.84211	1.12003	0.121005	0.189504	not	182.321	172 - 191	1.80698	0.971413	0.636518	0.756175	not	not
YOR012W	YOR012W	100.958	91.1 - 113	113.284	99.2 - 129	1.11819	0.958634	0.525606	0.607816	not	132.551	88.5 - 195	1.3053	0.793646	0.0487925	0.0934859	not	216.215	179 - 258	2.13874	1.14977	0.0741401	0.189705	not	reliable
YML002W	YML002W	100.973	84.1 - 124	130.089	117 - 145	1.2835	1.10036	0.199453	0.27882	not	160.655	144 - 177	1.59137	0.96758	0.586873	0.665865	not	132.961	NA	1.28984	0.693406	0.0353718	0.123801	not	not
YMR030W	RSF1	101.176	53.2 - 177	176.101	136 - 226	1.7351	1.48752	0.0299536	0.0648306	not	268.544	173 - 406	2.65074	1.6117	0.0181512	0.0451466	induced	295.778	243 - 377	2.93062	1.57547	0.0138675	0.0791471	not	reliable
YLR273C	PIG1	101.37	87.7 - 119	121.707	108 - 138	1.19667	1.02592	0.690548	0.753277	not	165.488	112 - 238	1.61163	0.979897	0.855207	0.885582	not	221.763	180 - 268	2.18226	1.17316	0.0605323	0.168324	not	not
YNL277W	MET2	101.376	89.2 - 118	108.755	88.3 - 133	1.07343	0.92026	0.198372	0.277584	not	211.578	202 - 220	2.08672	1.26876	0.00560555	0.020955	not	218.03	143 - 313	2.12788	1.14393	0.23837	0.397161	not	reliable
YLR092W	SUL2	101.85	92.8 - 114	89.0015	78.4 - 100	0.87503	0.750173	0.00104467	0.00986424	not	105.807	99.3 - 113	1.03815	0.63121	0.000313683	0.00609688	repressed	173.668	110 - 272	1.67887	0.902543	0.421995	0.575411	not	not
YIL146C	ATG32	101.919	90.1 - 112	181.646	161 - 206	1.79067	1.53516	0.000872266	0.00929103	induced	272.054	242 - 306	2.68645	1.63341	0.00043397	0.00663013	induced	245.324	164 - 368	2.40101	1.29076	0.0546737	0.159047	not	not
YFR026C	ULI1	102.128	71.8 - 147	116.202	80.9 - 162	1.13523	0.973247	0.796522	0.841923	not	155.787	137 - 176	1.52601	0.927838	0.396648	0.488981	not	199.608	175 - 226	1.95458	1.05077	0.565215	0.699072	not	not
YPL119C-A	YPL119C-A	102.706	101 - 103	110.999	108 - 115	1.08315	0.9286	0.149399	0.221611	not	155.686	140 - 176	1.51685	0.922272	0.220196	0.306681	not	152.085	145 - 160	1.48488	0.798254	0.0036756	0.0502154	not	not
YLR233C	EST1	102.78	93.5 - 111	171.988	158 - 186	1.68533	1.44485	0.000582024	0.00793236	not	240.118	233 - 249	2.3523	1.43024	0.000875673	0.00815949	not	224.279	206 - 247	2.19777	1.1815	0.0233242	0.0994135	not	not
YGR212W	SLI1	102.974	69.6 - 149	158.82	154 - 163	1.54093	1.32106	0.0188307	0.0461266	not	241.641	229 - 255	2.34869	1.42804	0.00635284	0.0226086	not	292.175	237 - 362	2.83302	1.523	0.00458207	0.0525683	not	not
YLL056C	YLL056C	103.152	101 - 104	148.895	146 - 152	1.448	1.24139	0.00404966	0.017596	not	172.449	162 - 183	1.67698	1.01963	0.722336	0.78207	not	224.274	213 - 237	2.18324	1.17369	0.0148232	0.0817951	not	reliable
YPL174C	NIP100	103.152	101 - 104	136.134	106 - 174	1.3245	1.13551	0.0753685	0.129373	not	169.973	162 - 180	1.65312	1.00512	0.924164	0.939415	not	189.673	137 - 264	1.83268	0.985231	0.867675	0.92359	not	not
YLL054C	YLL054C	103.975	97.3 - 113	155.784	137 - 175	1.49451	1.28126	0.00752139	0.0253971	not	209.02	166 - 264	2.01151	1.22303	0.0182164	0.045249	not	215.634	210 - 222	2.0784	1.11733	0.0517927	0.154682	not	reliable
YPL060W	MFM1	104.87	104 - 107	137.252	101 - 181	1.31268	1.12538	0.114677	0.179324	not	214.155	187 - 244	2.05008	1.24648	0.00535226	0.0204912	not	206.984	198 - 218	1.98095	1.06494	0.244253	0.402768	not	not
YNL249C	MPA43	104.89	99.1 - 108	153.214	127 - 188	1.46868	1.25912	0.00760933	0.0255894	not	235.099	212 - 264	2.24932	1.36762	0.00250605	0.0129682	not	254.528	214 - 299	2.43703	1.31012	0.00425677	0.0512948	not	reliable
YKL061W	BLI1	104.981	82.5 - 129	113.851	111 - 116	1.09836	0.941638	0.468314	0.553213	not	168.569	125 - 230	1.62515	0.988119	0.900194	0.922373	not	235.381	219 - 255	2.27563	1.22336	0.0374012	0.127897	not	reliable
YNR060W	FRE4	105.247	49.4 - 213	135.852	124 - 148	1.36477	1.17003	0.401855	0.489847	not	99.38	77.9 - 126	1.00026	0.608177	0.0313717	0.0670591	not	123.102	120 - 126	1.24017	0.666703	0.0560317	0.160952	not	reliable
YMR253C	YMR253C	105.25	92.5 - 121	78.593	69.4 - 88.3	0.747423	0.640774	0.000142037	0.00626999	repressed	99.4185	61.6 - 160	0.922607	0.560961	0.00653952	0.0230308	repressed	167.526	148 - 188	1.59285	0.8563	0.0235303	0.0999904	not	not
YOR273C	TPO4	105.449	58.1 - 180	136.685	114 - 166	1.30446	1.11833	0.408304	0.496532	not	204.336	171 - 248	1.94931	1.18521	0.226461	0.313553	not	177.335	126 - 239	1.67822	0.902196	0.501376	0.646405	not	not
YIL084C	SDS3	105.645	90.7 - 124	135.301	130 - 140	1.27861	1.09616	0.150852	0.223122	not	185.231	165 - 207	1.75418	1.06657	0.278703	0.370381	not	123.121	NA	1.14939	0.617901	0.00598749	0.0578893	not	not
YPL209C	IPL1	106.604	103 - 109	112.216	89.4 - 142	1.05774	0.906808	0.165896	0.240839	not	169.271	150 - 193	1.59642	0.970649	0.589197	0.667567	not	232.287	227 - 240	2.19096	1.17784	0.0164096	0.0848264	not	not
YKR020W	VPS51	107.227	70.4 - 162	135.769	118 - 155	1.26359	1.08329	0.461636	0.546695	not	200.054	146 - 270	1.86424	1.13349	0.292015	0.384548	not	266.294	178 - 384	2.46839	1.32698	0.0609601	0.168553	not	reliable
YCR020W-B	HTL1	107.45	NA	92.9518	NA	0.865731	0.742201	0.0027533	0.0145832	not	188.476	NA	1.76222	1.07146	0.207949	0.293819	not	273.51	NA	2.50962	1.34914	0.0546842	0.159047	not	reliable
YAR035W	YAT1	107.473	102 - 111	115.427	96.1 - 137	1.08069	0.926488	0.220533	0.302458	not	189.295	180 - 196	1.77203	1.07742	0.205093	0.290655	not	217.452	182 - 254	2.03123	1.09197	0.223517	0.382168	not	not
YLR343W	GAS2	107.484	98.8 - 114	128.204	122 - 133	1.20086	1.02951	0.594627	0.67113	not	195.904	185 - 207	1.83582	1.11621	0.0907495	0.151024	not	227.887	144 - 345	2.10395	1.13106	0.327149	0.485148	not	not
YMR025W	CSI1	107.576	82 - 134	109.18	98.3 - 124	1.03236	0.885058	0.184219	0.262124	not	184.678	169 - 203	1.74639	1.06183	0.491483	0.57889	not	224.855	195 - 260	2.12156	1.14053	0.192813	0.345586	not	not
YMR075W	RCO1	107.587	NA	183.736	94 - 332	1.70911	1.46524	0.0536128	0.100011	not	260.45	106 - 550	2.37363	1.44321	0.110047	0.1755	not	288.599	137 - 574	2.63062	1.41419	0.115757	0.249229	not	reliable
YLR376C	PSY3	107.839	99.7 - 117	158.077	150 - 167	1.46846	1.25893	0.00242021	0.0135917	not	221.013	205 - 236	2.05091	1.24699	0.00761615	0.0252441	not	294.538	NA	2.72533	1.46511	0.00210619	0.0394875	not	reliable
YDR506C	YDR506C	107.92	98.2 - 116	140.354	108 - 185	1.30866	1.12193	0.166816	0.241988	not	181.884	167 - 194	1.69531	1.03078	0.64624	0.719089	not	161.939	137 - 190	1.50832	0.810857	0.0229453	0.0987568	not	not
YMR271C	URA10	108.162	80.8 - 143	82.2857	73.7 - 91.5	0.76079	0.652233	0.00120485	0.0103216	repressed	146.134	125 - 170	1.34543	0.818044	0.0627533	0.113036	not	205.129	189 - 221	1.8954	1.01895	0.805802	0.880699	not	not
YOL078W	AVO1	108.364	95.6 - 121	177.901	171 - 184	1.656	1.41971	0.00117633	0.0101976	not	243.045	205 - 283	2.25547	1.37136	0.0062882	0.022425	not	221.822	191 - 256	2.06417	1.10968	0.153322	0.29934	not	reliable
YER180C-A	SLO1	108.364	94.2 - 119	55.0305	51.3 - 58	0.511747	0.438727	1.70277e-05	0.00626999	repressed	55.3651	NA	0.513403	0.312158	1.7587e-05	0.0060363	repressed	189.742	160 - 220	1.76514	0.948923	0.450938	0.602671	not	not
YPR003C	YPR003C	108.365	102 - 114	131.216	94.3 - 174	1.19957	1.0284	0.766514	0.81831	not	196.839	159 - 245	1.8106	1.10088	0.261663	0.352709	not	192.775	161 - 234	1.77899	0.956369	0.513803	0.656074	not	not
YMR069W	NAT4	108.383	NA	169.977	144 - 202	1.58436	1.35829	0.00420927	0.0180088	not	228.509	223 - 234	2.12961	1.29484	0.00722226	0.0245045	not	168.162	NA	1.56178	0.839598	0.0752559	0.191302	not	not
YMR287C	DSS1	108.517	68.5 - 161	144.858	129 - 163	1.37408	1.17802	0.193559	0.272622	not	184.513	NA	1.73974	1.05779	0.686439	0.75364	not	176.136	NA	1.66948	0.897494	0.372959	0.528818	not	not
YMR104C	YPK2	108.776	100 - 116	117.879	106 - 130	1.09172	0.935944	0.25953	0.344659	not	178.94	164 - 194	1.65454	1.00599	0.927018	0.9415	not	237.833	234 - 241	2.20266	1.18413	0.0227194	0.0985948	not	not
YHR109W	CTM1	109.267	90 - 126	160.596	147 - 174	1.48308	1.27146	0.0206975	0.04979	not	215.175	192 - 240	1.98852	1.20905	0.0556806	0.103021	not	216.261	200 - 236	2.00366	1.07715	0.323611	0.48205	not	not
YKL124W	SSH4	109.302	83.7 - 134	130.822	129 - 133	1.21599	1.04248	0.61799	0.691191	not	200.889	181 - 221	1.86861	1.13614	0.168416	0.247419	not	191.552	NA	1.77933	0.95655	0.618476	0.741909	not	not
YLR394W	CST9	109.59	98.2 - 123	165.167	142 - 190	1.51014	1.29466	0.00220851	0.0130118	not	243.649	235 - 255	2.22768	1.35447	0.0008501	0.00804041	not	321.175	266 - 386	2.93101	1.57568	0.000331942	0.0212635	induced	not
YLR139C	SLS1	109.921	91.4 - 134	194.164	174 - 215	1.76183	1.51043	0.000689372	0.00856942	induced	256.664	243 - 269	2.33556	1.42006	0.00094952	0.00832396	not	227.999	192 - 273	2.07156	1.11365	0.146128	0.290442	not	not
YAR023C	YAR023C	110.078	97 - 122	110.682	108 - 114	1.01369	0.86905	0.051605	0.0970662	not	83.8849	73.4 - 93.6	0.765961	0.465717	8.03474e-05	0.0060363	repressed	219.312	196 - 242	2.00776	1.07935	0.278205	0.436073	not	not
YOR363C	PIP2	110.28	82.9 - 151	149.661	106 - 209	1.35381	1.16064	0.180093	0.257613	not	180.396	149 - 221	1.6346	0.993866	0.943721	0.954956	not	155.201	NA	1.40484	0.755229	0.017778	0.0874527	not	not
YGL212W	VAM7	110.524	94.9 - 124	96.6632	88.6 - 105	0.883503	0.757437	0.00476421	0.0193302	not	178.221	144 - 215	1.62795	0.989823	0.889735	0.913749	not	179.829	NA	1.64124	0.882312	0.130024	0.268792	not	not
YLR446W	YLR446W	110.634	69.4 - 173	117.821	111 - 124	1.06524	0.913245	0.422047	0.509737	not	185.765	177 - 194	1.68161	1.02245	0.840375	0.873558	not	235.376	226 - 245	2.13383	1.14712	0.224307	0.382487	not	not
YPR083W	MDM36	110.857	103 - 119	141.256	131 - 151	1.27453	1.09267	0.142106	0.212801	not	163.048	152 - 175	1.47528	0.896993	0.0607153	0.110349	not	193.382	154 - 245	1.74092	0.935899	0.407671	0.561292	not	not
YDL105W	NSE4	110.857	104 - 118	122.54	100 - 150	1.10855	0.950374	0.369173	0.457603	not	184.661	166 - 203	1.66688	1.01349	0.825836	0.863707	not	188.517	150 - 235	1.70188	0.914916	0.196967	0.350109	not	reliable
YOR279C	RFM1	110.919	106 - 115	110.448	103 - 120	1.00229	0.859277	0.0265951	0.059715	not	172.45	127 - 239	1.56057	0.948854	0.512067	0.597165	not	242.773	239 - 246	2.2037	1.18469	0.0184727	0.089119	not	not
YBR270C	BIT2	111.048	82 - 149	155.051	120 - 198	1.4094	1.2083	0.13641	0.205578	not	218.436	NA	1.99081	1.21045	0.132176	0.203592	not	217.489	NA	1.99612	1.0731	0.442607	0.594346	not	reliable
YGR154C	GTO1	111.602	89 - 141	147.086	128 - 167	1.31175	1.12458	0.171407	0.247379	not	205.773	198 - 214	1.84223	1.1201	0.142959	0.216287	not	216.978	106 - 419	1.88981	1.01594	0.923019	0.954685	not	reliable
YDR030C	RAD28	111.726	106 - 117	119.505	111 - 128	1.07315	0.920026	0.110195	0.173711	not	168.234	129 - 215	1.50893	0.917457	0.211038	0.297297	not	187.301	135 - 268	1.67165	0.898661	0.245766	0.40438	not	not
YLL042C	ATG10	111.818	96.6 - 126	114.385	90 - 142	1.02488	0.878638	0.200472	0.280037	not	142.286	128 - 158	1.28336	0.780307	0.0159935	0.0414572	not	238.462	226 - 252	2.1558	1.15894	0.0592605	0.166259	not	reliable
YCR021C	HSP30	111.978	71.1 - 170	161.304	143 - 180	1.48897	1.27651	0.0923527	0.151625	not	241.474	235 - 247	2.22908	1.35532	0.0476082	0.0916107	not	164.978	98.4 - 254	1.49213	0.802154	0.242014	0.401181	not	not
YNL195C	YNL195C	112.306	109 - 115	164.691	153 - 178	1.46818	1.25868	0.00592587	0.0221502	not	230.832	153 - 325	2.03658	1.23827	0.0875632	0.146917	not	234.152	214 - 256	2.0931	1.12523	0.0491088	0.150358	not	reliable
YJR036C	HUL4	112.527	98.1 - 129	124.717	111 - 139	1.10952	0.951208	0.346808	0.435995	not	185.38	177 - 193	1.64697	1.00138	0.980874	0.985149	not	185.985	148 - 232	1.64769	0.885784	0.14455	0.288082	not	not
YOR137C	SIA1	112.594	109 - 116	145.258	129 - 166	1.29562	1.11075	0.0728248	0.126271	not	211.863	201 - 224	1.88957	1.14889	0.028735	0.0628462	not	174.958	NA	1.55149	0.834067	0.066238	0.177653	not	not
YCR102C	YCR102C	112.601	109 - 117	279.814	257 - 302	2.49093	2.1355	9.57835e-06	0.00626999	induced	396.44	269 - 583	3.51354	2.13629	0.00019445	0.0060363	induced	354.445	353 - 355	3.16117	1.69941	4.08497e-05	0.008215	induced	reliable
YKR039W	GAP1	112.617	109 - 115	115.868	90.7 - 141	1.03443	0.886826	0.0917133	0.150821	not	168.334	153 - 184	1.50337	0.914072	0.137137	0.209351	not	178.571	135 - 240	1.58282	0.850909	0.117497	0.251729	not	not
YNL142W	MEP2	112.73	83.6 - 143	170.512	162 - 178	1.53788	1.31844	0.0154683	0.0406169	not	242.076	240 - 244	2.18404	1.32793	0.0146934	0.0390535	not	218.123	188 - 260	1.96611	1.05696	0.540358	0.677665	not	reliable
YDR386W	MUS81	112.951	97.2 - 131	114.802	110 - 121	1.01453	0.869764	0.0473711	0.090979	not	178.27	148 - 216	1.57205	0.955835	0.560252	0.640935	not	223.65	223 - 225	1.98182	1.06541	0.243698	0.402715	not	not
YPL194W	DDC1	113.463	112 - 114	102.543	76.5 - 134	0.896665	0.768721	0.0319447	0.0676195	not	136.28	108 - 169	1.19979	0.729494	0.00755393	0.0251064	not	162.55	133 - 195	1.43488	0.771379	0.00940525	0.0683207	not	not
YOL117W	RRI2	113.526	103 - 124	160.478	134 - 190	1.42697	1.22336	0.0190647	0.0465991	not	214.841	192 - 241	1.91031	1.1615	0.0524639	0.0985641	not	240.295	230 - 250	2.13584	1.14821	0.0661706	0.177627	not	not
YPR179C	HDA3	113.626	67.7 - 192	153.078	94.6 - 240	1.3258	1.13662	0.461002	0.546286	not	216.815	207 - 229	1.91917	1.16689	0.246392	0.335643	not	205.833	121 - 331	1.79946	0.967371	0.834598	0.900743	not	not
YDL129W	YDL129W	114.514	75.7 - 162	104.26	87.5 - 121	0.934535	0.801187	0.0839813	0.140571	not	148.527	119 - 184	1.33005	0.808692	0.102971	0.166544	not	202.065	191 - 211	1.81119	0.973678	0.804637	0.880431	not	reliable
YDL243C	AAD4	114.568	109 - 118	153.643	112 - 205	1.33435	1.14395	0.196247	0.275496	not	208.783	183 - 244	1.8344	1.11535	0.105591	0.169569	not	263.68	201 - 353	2.30305	1.2381	0.0450434	0.142327	not	reliable
YHR153C	SPO16	114.756	113 - 115	93.6018	87.2 - 101	0.819488	0.702556	0.00041243	0.00723738	not	142.27	134 - 152	1.2462	0.757713	0.00169666	0.0108433	not	199.586	196 - 205	1.74808	0.939751	0.251563	0.410159	not	not
YIR039C	YPS6	115.088	97 - 133	120.273	104 - 140	1.04013	0.891714	0.141854	0.21248	not	245.489	244 - 247	2.1343	1.29769	0.00276595	0.0137713	not	363.754	290 - 454	3.1537	1.6954	0.000325885	0.0212635	induced	not
YPL167C	REV3	115.111	102 - 129	145.527	118 - 177	1.25662	1.07731	0.347575	0.436767	not	183.991	144 - 230	1.59161	0.967723	0.678557	0.747113	not	201.449	186 - 216	1.75242	0.942084	0.255197	0.413886	not	not
YLR151C	PCD1	115.2	112 - 118	102.909	87.2 - 121	0.899019	0.770739	0.00346664	0.0163394	not	124.671	105 - 148	1.08351	0.658792	0.00190954	0.0113402	repressed	342.701	318 - 370	2.99309	1.60906	0.000136659	0.01696	induced	not
YDL048C	STP4	115.223	105 - 125	93.8354	91.8 - 95.6	0.820045	0.703033	0.00103622	0.00986424	not	179.641	138 - 230	1.56135	0.949328	0.565316	0.645553	not	208.13	113 - 370	1.77512	0.954285	0.758868	0.848253	not	not
YGR071C	YGR071C	115.291	90.6 - 143	189.593	172 - 208	1.66934	1.43115	0.00388385	0.0172365	not	241.074	161 - 360	2.108	1.2817	0.0641168	0.114943	not	231.73	165 - 324	2.02722	1.08981	0.430669	0.583161	not	reliable
YGL251C	HFM1	115.89	90.2 - 145	77.9574	65.6 - 90.6	0.67268	0.576696	0.000206524	0.00626999	repressed	90.9592	70.2 - 120	0.777398	0.472671	0.000416783	0.00654862	repressed	184.759	159 - 214	1.59015	0.854849	0.0848397	0.205972	not	not
YJL213W	YJL213W	116.002	109 - 123	140.155	139 - 140	1.21029	1.0376	0.444064	0.53055	not	197.175	170 - 226	1.70439	1.0363	0.491129	0.578593	not	169.99	152 - 192	1.46916	0.789804	0.0029342	0.0460996	not	reliable
YDR383C	NKP1	116.092	102 - 129	99.5403	86.1 - 113	0.860471	0.737691	0.00729767	0.0249362	not	152.909	140 - 167	1.32681	0.806726	0.0191191	0.0467926	not	193.447	162 - 228	1.67918	0.902711	0.175365	0.325132	not	reliable
YPR168W	NUT2	116.182	84.6 - 157	59.29	41.6 - 82.6	0.510408	0.437578	0.00105887	0.00989871	repressed	75.7397	NA	0.663211	0.403244	0.00012261	0.0060363	repressed	112.068	NA	0.974767	0.524025	0.00162462	0.0360325	repressed	not
YPL191C	YPL191C	117.143	68.4 - 183	123.591	87 - 170	1.08923	0.933809	0.632592	0.704319	not	191.386	187 - 196	1.69031	1.02774	0.831527	0.867413	not	197.076	NA	1.72902	0.929502	0.620096	0.742435	not	not
YMR023C	MSS1	117.226	99.4 - 135	170.234	105 - 261	1.43988	1.23443	0.108922	0.172421	not	244.568	224 - 263	2.08429	1.26728	0.008028	0.0261257	not	269.35	213 - 341	2.29214	1.23223	0.0254436	0.104068	not	reliable
YGR109W-A	YGR109W-A	117.784	112 - 125	132.682	130 - 135	1.13246	0.970875	0.605511	0.680868	not	152.005	102 - 222	1.27909	0.777707	0.0738526	0.128843	not	309.417	288 - 330	2.64499	1.42192	0.000737606	0.0281255	not	not
YKL218C	SRY1	118.14	108 - 126	124.393	99 - 153	1.04605	0.896789	0.213966	0.295097	not	163.062	108 - 241	1.35933	0.826495	0.158044	0.234947	not	362.386	275 - 472	3.0616	1.64589	0.000535916	0.0258687	induced	reliable
YER037W	PHM8	118.563	107 - 128	156.016	115 - 212	1.3158	1.12805	0.151164	0.223466	not	351.485	348 - 354	2.97014	1.8059	2.78848e-05	0.0060363	induced	364.966	322 - 414	3.08134	1.6565	0.00012473	0.0160335	induced	not
YLL019C	KNS1	118.63	113 - 125	200.535	194 - 208	1.69876	1.45637	0.000426209	0.00723738	not	309.227	290 - 330	2.62251	1.59453	0.000150182	0.0060363	induced	292.138	279 - 307	2.47745	1.33185	0.00153908	0.0356419	not	not
YBR065C	ECM2	118.675	104 - 134	116.636	116 - 117	0.991089	0.849672	0.0386704	0.0782324	not	160.839	NA	1.36764	0.831549	0.0279207	0.0614952	not	221.774	NA	1.88365	1.01263	0.861205	0.918532	not	not
YJL206C	YJL206C	118.675	104 - 133	157.168	145 - 170	1.33694	1.14618	0.0628541	0.112643	not	201.322	161 - 253	1.70102	1.03425	0.718797	0.779383	not	203.296	197 - 209	1.72976	0.929903	0.269624	0.427408	not	not
YFR008W	FAR7	119.065	112 - 125	92.5102	80.6 - 105	0.777531	0.666585	0.00142263	0.010903	repressed	128.302	102 - 160	1.07766	0.655237	0.00243473	0.0127333	repressed	192.772	158 - 237	1.62365	0.872858	0.106133	0.236801	not	not
YJL088W	ARG3	119.087	110 - 129	96.971	65.4 - 139	0.818252	0.701496	0.0073054	0.0249362	not	141.618	117 - 168	1.19822	0.728536	0.00288831	0.0141442	not	163.145	114 - 237	1.36646	0.734595	0.0255936	0.104068	not	not
YMR040W	YET2	119.469	118 - 120	94.8175	81.9 - 110	0.792133	0.679104	0.00177402	0.0116402	not	133.955	132 - 136	1.12579	0.684502	0.000368652	0.00624932	not	211.92	202 - 222	1.78122	0.957564	0.411832	0.565369	not	not
YPL109C	YPL109C	119.566	99.1 - 145	183.472	169 - 197	1.55416	1.3324	0.00687751	0.024176	not	276.906	263 - 292	2.34392	1.42515	0.00323879	0.0151393	not	257.558	233 - 287	2.17964	1.17175	0.0762754	0.192854	not	not
YER158C	YER158C	119.979	103 - 140	175.49	154 - 196	1.47895	1.26792	0.0116745	0.0335865	not	245.956	205 - 306	2.06186	1.25365	0.0408409	0.081308	not	268.745	199 - 363	2.25395	1.2117	0.0720781	0.187038	not	not
YDR438W	THI74	120.001	98.6 - 144	168.494	147 - 192	1.41632	1.21422	0.0567604	0.104572	not	184.728	177 - 194	1.55982	0.948395	0.485548	0.573332	not	192.794	186 - 199	1.62728	0.874809	0.116307	0.250031	not	reliable
YDR109C	YDR109C	120.177	93.1 - 153	171.245	147 - 196	1.42491	1.22159	0.0242123	0.0557313	not	227.002	191 - 276	1.88127	1.14384	0.146009	0.219635	not	225.449	171 - 303	1.86392	1.00202	0.983081	0.988851	not	not
YDL087C	LUC7	120.3	116 - 123	117.002	78.5 - 172	0.971527	0.832901	0.0787617	0.133656	not	206.512	127 - 325	1.70491	1.03661	0.738137	0.795068	not	265.041	196 - 354	2.20027	1.18284	0.064156	0.174204	not	reliable
YPR068C	HOS1	120.945	79.7 - 178	159.703	153 - 166	1.32151	1.13295	0.216511	0.298	not	202.462	173 - 236	1.67601	1.01904	0.845972	0.877948	not	199.581	190 - 211	1.65198	0.888087	0.240831	0.399572	not	reliable
YMR068W	AVO2	121.47	95.1 - 153	160.196	144 - 177	1.31346	1.12605	0.149333	0.221611	not	223.591	205 - 245	1.84072	1.11919	0.125469	0.194998	not	279.783	276 - 283	2.30306	1.2381	0.0144883	0.0811347	not	not
YNL242W	ATG2	121.548	108 - 135	165.876	148 - 186	1.36106	1.16685	0.0429512	0.0846609	not	258.52	242 - 278	2.12719	1.29337	0.00377817	0.0164126	not	260.012	220 - 306	2.13722	1.14895	0.0672027	0.179123	not	not
YOR350C	MNE1	121.993	113 - 130	171.03	142 - 203	1.3964	1.19715	0.037856	0.0770192	not	252.649	239 - 269	2.0754	1.26188	0.0031224	0.0147908	not	235.317	173 - 320	1.92052	1.03245	0.706773	0.810196	not	not
YDL206W	YDL206W	122.094	110 - 135	188.207	131 - 256	1.54988	1.32873	0.0160618	0.0415512	not	257.852	238 - 280	2.12945	1.29474	0.0048891	0.0192837	not	271.098	212 - 350	2.22802	1.19776	0.0675796	0.179477	not	not
YLR423C	ATG17	122.105	108 - 138	124.868	117 - 132	1.03169	0.884481	0.0793479	0.134449	not	208.534	197 - 221	1.72357	1.04796	0.460666	0.549921	not	335.967	293 - 379	2.77377	1.49115	0.00106952	0.0322848	not	reliable
YHR011W	DIA4	122.383	104 - 141	181.619	122 - 261	1.4791	1.26805	0.0364285	0.0749508	not	228.626	209 - 248	1.86964	1.13677	0.0484212	0.0929319	not	257.561	237 - 282	2.10447	1.13134	0.0669467	0.178693	not	reliable
YER047C	SAP1	122.406	109 - 134	141.272	138 - 144	1.15516	0.990327	0.836995	0.872796	not	212.08	208 - 218	1.73477	1.05477	0.313004	0.406066	not	219.36	NA	1.79225	0.963498	0.535961	0.673644	not	not
YKR098C	UBP11	123.132	79.6 - 174	148.446	102 - 203	1.22382	1.04919	0.74403	0.798072	not	266.835	257 - 278	2.22977	1.35574	0.038503	0.0777977	not	245.225	229 - 262	2.04928	1.10167	0.423675	0.57659	not	not
YNL025C	SSN8	123.251	107 - 138	135.91	130 - 141	1.10332	0.945892	0.279367	0.364079	not	163.851	144 - 186	1.33059	0.809022	0.00784319	0.0256868	not	206.427	NA	1.66721	0.896274	0.224083	0.382487	not	not
YHR171W	ATG7	123.445	103 - 147	141.756	130 - 153	1.16277	0.996857	0.964441	0.973564	not	215.777	184 - 250	1.76367	1.07234	0.432403	0.523139	not	207.629	183 - 236	1.70236	0.915169	0.261034	0.419317	not	not
YHR150W	PEX28	123.574	92.4 - 168	177.868	154 - 209	1.433	1.22852	0.0494413	0.0940916	not	246.558	195 - 314	1.9829	1.20564	0.101007	0.164212	not	237.849	223 - 255	1.92496	1.03484	0.651152	0.768395	not	reliable
YDR065W	RRG1	123.663	105 - 143	113.301	111 - 115	0.915713	0.785051	0.0038251	0.0171432	not	149.396	142 - 158	1.20881	0.734979	0.0012735	0.00942791	not	242.789	217 - 268	1.96415	1.05591	0.338816	0.49788	not	reliable
YDR126W	SWF1	123.687	109 - 137	120.44	111 - 129	0.971738	0.833082	0.0194474	0.047289	not	148.994	124 - 178	1.20041	0.729869	0.00541818	0.0205811	not	202.078	172 - 233	1.63467	0.878782	0.0521952	0.15505	not	reliable
YJL019W	MPS3	123.775	117 - 131	158.986	155 - 163	1.29055	1.10641	0.0849379	0.141881	not	177.568	NA	1.44142	0.876407	0.0519648	0.0979709	not	197.14	173 - 221	1.60085	0.8606	0.0316947	0.11618	not	not
YIL097W	FYV10	124.398	87.1 - 174	115.327	113 - 117	0.926775	0.794534	0.0338597	0.0709036	not	212.481	193 - 229	1.70603	1.0373	0.693562	0.758319	not	265.622	238 - 297	2.13583	1.1482	0.152431	0.298218	not	not
YDR138W	HPR1	124.554	113 - 134	115.753	107 - 126	0.927749	0.79537	0.0071926	0.0247454	not	158.096	144 - 173	1.27135	0.773002	0.00219421	0.0120936	not	237.838	233 - 240	1.91256	1.02817	0.57044	0.703228	not	not
YIL006W	YIA6	124.56	114 - 136	154.674	135 - 179	1.24379	1.06631	0.226777	0.309073	not	208.383	193 - 223	1.67287	1.01713	0.769838	0.82	not	227.32	NA	1.82328	0.980176	0.758375	0.847931	not	reliable
YJL057C	IKS1	124.59	121 - 128	124.842	105 - 148	1.00499	0.861589	0.0268961	0.0601834	not	194.968	137 - 278	1.56204	0.949747	0.543894	0.626148	not	213.78	213 - 216	1.72103	0.92521	0.137737	0.278926	not	reliable
YLL013C	PUF3	124.61	123 - 125	343.964	335 - 353	2.77115	2.37573	2.84268e-06	0.00626999	induced	617.142	551 - 682	4.96506	3.01884	2.18547e-06	0.0060363	induced	311.314	234 - 394	2.49928	1.34359	0.00644396	0.0592486	not	reliable
YJL083W	TAX4	124.779	93.7 - 164	143.19	127 - 165	1.16983	1.00291	0.97443	0.981545	not	206.409	206 - 206	1.68557	1.02485	0.789691	0.836578	not	208.223	204 - 212	1.70096	0.914421	0.341165	0.500293	not	not
YLR460C	YLR460C	125.009	59 - 227	599.561	526 - 682	5.08204	4.35689	0.000215006	0.00626999	induced	860.127	596 - 1240	7.24	4.40204	0.000299863	0.0060363	induced	490.687	379 - 626	4.14455	2.22807	0.00431652	0.0514808	not	reliable
YDR043C	NRG1	125.06	120 - 130	127.737	112 - 147	1.02418	0.878043	0.0317795	0.0673304	not	196.857	188 - 207	1.57676	0.958694	0.440399	0.530429	not	284.132	257 - 318	2.27682	1.224	0.00750669	0.0629005	not	reliable
YGR121W-A	YGR121W-A	125.333	98.4 - 160	125.691	68 - 229	0.989097	0.847964	0.259996	0.345034	not	132.767	126 - 138	1.05759	0.643035	0.000794728	0.00788593	repressed	211.919	202 - 222	1.69028	0.908677	0.172155	0.321558	not	reliable
YOR381W	FRE3	125.333	97.8 - 159	189.493	185 - 193	1.51042	1.2949	0.00593864	0.0221709	not	235.569	198 - 279	1.87886	1.14238	0.0890821	0.148935	not	185.409	173 - 200	1.47929	0.79525	0.00975818	0.0694242	not	reliable
YPL014W	YPL014W	125.769	98.7 - 157	134.944	127 - 143	1.0705	0.917755	0.221241	0.303208	not	181.285	175 - 186	1.43999	0.875536	0.0832753	0.141338	not	244.647	214 - 278	1.9442	1.04518	0.503767	0.648232	not	reliable
YMR013W-A	YMR013W-A	126.539	86.4 - 177	192.429	185 - 200	1.55639	1.33431	0.0313873	0.0667037	not	280.354	224 - 345	2.2673	1.37855	0.0267702	0.0597523	not	377.206	304 - 464	3.04688	1.63797	0.00441401	0.0515194	not	not
YHL010C	ETP1	126.592	90.4 - 166	160.612	159 - 161	1.26733	1.0865	0.265299	0.350018	not	255.292	237 - 277	2.01671	1.22619	0.0264348	0.0592139	not	287.828	263 - 316	2.27302	1.22195	0.0280625	0.108862	not	reliable
YIL122W	POG1	126.631	92.8 - 171	122.675	121 - 125	0.988325	0.847301	0.12721	0.194355	not	245.705	195 - 313	1.96939	1.19742	0.160328	0.237511	not	321.206	229 - 433	2.57399	1.38375	0.0319974	0.11676	not	not
YLR457C	NBP1	126.883	101 - 155	154.766	150 - 159	1.23484	1.05864	0.478002	0.561608	not	211.478	200 - 226	1.6906	1.02791	0.721287	0.781613	not	312.457	274 - 357	2.49514	1.34136	0.0099974	0.0702348	not	reliable
YGL104C	VPS73	127.071	105 - 152	141.672	134 - 150	1.11479	0.95572	0.431546	0.518777	not	198.982	198 - 199	1.5659	0.952093	0.417688	0.508599	not	215.624	209 - 221	1.69693	0.912251	0.152798	0.298729	not	not
YDR058C	TGL2	127.161	124 - 129	144.125	140 - 147	1.13511	0.97314	0.576815	0.655904	not	183.038	166 - 199	1.44053	0.875865	0.0622614	0.112436	not	194.049	177 - 211	1.53025	0.822647	0.00638222	0.0592486	not	reliable
YBR228W	SLX1	127.183	124 - 129	211.177	201 - 220	1.66463	1.42711	0.000428049	0.00723738	not	285.373	NA	2.24535	1.36521	0.00613083	0.0220585	not	288.369	NA	2.26593	1.21814	0.037362	0.127897	not	reliable
YER071C	YER071C	127.855	88.7 - 190	134.001	104 - 172	1.03843	0.890257	0.330817	0.419436	not	225.632	197 - 254	1.76619	1.07387	0.44581	0.53592	not	264.988	257 - 272	2.07465	1.11531	0.244081	0.402715	not	reliable
YBR225W	YBR225W	127.895	96.9 - 164	215.679	178 - 262	1.68554	1.44504	0.00267272	0.0142882	not	297.517	257 - 347	2.32513	1.41372	0.00277581	0.0137747	not	284.772	NA	2.22097	1.19397	0.0603541	0.168159	not	reliable
YOR162C	YRR1	127.917	104 - 161	194.164	175 - 216	1.51372	1.29773	0.0073016	0.0249362	not	242.543	193 - 297	1.88572	1.14655	0.149087	0.223276	not	234.096	187 - 292	1.82322	0.980143	0.802669	0.879484	not	reliable
YMR168C	CEP3	128.007	122 - 134	169.394	166 - 172	1.32533	1.13622	0.0306663	0.0657999	not	243.28	232 - 254	1.90365	1.15745	0.0275928	0.0610343	not	266.853	241 - 294	2.08892	1.12298	0.0550693	0.159239	not	not
YER066W	RRT13	128.074	120 - 135	135.433	97.2 - 185	1.06117	0.909752	0.268533	0.353051	not	182.502	139 - 239	1.42333	0.865407	0.137121	0.209351	not	235.378	223 - 248	1.84889	0.993942	0.9072	0.946178	not	not
YIR014W	YIR014W	128.231	95.6 - 171	179.4	119 - 269	1.42097	1.21821	0.157707	0.230906	not	232.572	168 - 310	1.83404	1.11512	0.402976	0.495055	not	145.293	NA	1.15616	0.621539	0.00264699	0.0433953	repressed	reliable
YDL139C	SCM3	128.542	113 - 144	110.982	97.1 - 124	0.867223	0.74348	0.00614228	0.0226029	not	179.593	155 - 206	1.40911	0.856765	0.0496262	0.0946344	not	271.104	219 - 340	2.11932	1.13932	0.14533	0.289513	not	not
YDR541C	YDR541C	128.758	77.6 - 200	118.265	56.7 - 226	0.91028	0.780393	0.273203	0.357694	not	321.571	260 - 384	2.57445	1.56531	0.0168303	0.0428472	induced	292.844	188 - 453	2.32737	1.25117	0.195477	0.348308	not	reliable
YPL055C	LGE1	128.831	117 - 143	97.671	NA	0.758711	0.650451	0.000447042	0.00723738	repressed	147.825	NA	1.14152	0.694061	0.00720959	0.0244762	not	282.288	NA	2.19151	1.17814	0.0265332	0.106308	not	not
YBL019W	APN2	128.842	118 - 139	176.457	147 - 214	1.37138	1.1757	0.0261873	0.0589866	not	266.3	245 - 288	2.07006	1.25863	0.0037901	0.0164393	not	310.664	278 - 347	2.41323	1.29733	0.00283998	0.0450511	not	reliable
YOR308C	SNU66	128.853	121 - 137	169.896	126 - 231	1.30517	1.11894	0.256579	0.341462	not	220.395	206 - 236	1.71372	1.04197	0.414643	0.505872	not	246.462	233 - 262	1.91539	1.0297	0.57431	0.706151	not	reliable
YML099C	ARG81	128.965	115 - 146	185.424	167 - 206	1.44536	1.23912	0.0161011	0.0416208	not	243.914	188 - 310	1.89378	1.15145	0.158146	0.234961	not	237.891	178 - 311	1.85165	0.995428	0.956396	0.975772	not	not
YDR315C	IPK1	129.744	129 - 130	142.44	127 - 159	1.09682	0.940312	0.336642	0.425485	not	229.597	195 - 266	1.77493	1.07919	0.191042	0.274387	not	337.776	330 - 346	2.61204	1.4042	0.00038591	0.0226117	not	reliable
YGR121C	MEP1	129.778	123 - 136	182.53	169 - 197	1.41053	1.20926	0.0126909	0.0353662	not	222.386	194 - 256	1.72191	1.04695	0.42668	0.517543	not	241.585	193 - 307	1.86544	1.00284	0.967924	0.980546	not	reliable
YBR239C	ERT1	129.789	121 - 137	183.721	161 - 210	1.42384	1.22068	0.0107538	0.0318609	not	250.073	213 - 291	1.93712	1.1778	0.0299644	0.064736	not	266.214	264 - 269	2.06307	1.10909	0.0849764	0.205972	not	reliable
YLR132C	YLR132C	130.434	92.2 - 178	139.239	104 - 180	1.05491	0.904389	0.374333	0.462803	not	206.911	195 - 219	1.58654	0.964645	0.634865	0.708664	not	279.751	235 - 332	2.14002	1.15046	0.13758	0.278707	not	reliable
YOR005C	DNL4	130.445	97.1 - 176	201.053	161 - 248	1.53124	1.31274	0.0211004	0.0504642	not	273.712	236 - 313	2.09755	1.27534	0.0172162	0.0434492	not	269.313	254 - 286	2.06451	1.10986	0.179937	0.330859	not	reliable
YBR047W	FMP23	130.523	112 - 153	118.621	117 - 119	0.907985	0.778425	0.0037156	0.0169037	not	155.417	102 - 222	1.17395	0.713779	0.0246587	0.0561925	not	179.856	168 - 191	1.37877	0.741213	0.00131363	0.033468	not	reliable
YDL119C	YDL119C	131.114	114 - 147	144.951	134 - 155	1.11197	0.953305	0.469763	0.554353	not	232.892	212 - 252	1.79145	1.08923	0.193642	0.277136	not	313.105	NA	2.40848	1.29477	0.00427154	0.0512948	not	not
YDR369C	XRS2	131.126	114 - 147	160.987	142 - 179	1.23929	1.06245	0.345313	0.434503	not	199.783	162 - 242	1.52849	0.929346	0.42585	0.516869	not	286.528	236 - 352	2.19836	1.18182	0.0721634	0.187056	not	reliable
YLR037C	PAU23	131.369	111 - 155	150.829	126 - 182	1.1484	0.984537	0.799652	0.844442	not	208.75	158 - 264	1.57773	0.959287	0.648857	0.721717	not	292.063	213 - 390	2.21112	1.18868	0.0834343	0.204023	not	reliable
YGL059W	PKP2	131.459	129 - 133	193.422	187 - 201	1.47405	1.26372	0.00294367	0.0151358	not	274.43	261 - 286	2.09284	1.27248	0.00342018	0.0155879	not	315.663	223 - 448	2.3884	1.28398	0.0359188	0.125174	not	not
YMR158C-A	YMR158C-A	131.842	65.6 - 228	165.792	144 - 188	1.31247	1.1252	0.479562	0.563324	not	220.695	NA	1.74502	1.061	0.727198	0.786431	not	298.315	276 - 323	2.37268	1.27553	0.156208	0.302902	not	reliable
YOR295W	UAF30	131.983	114 - 148	119.588	108 - 133	0.914455	0.783972	0.00686813	0.024176	not	186.451	174 - 203	1.42309	0.865264	0.0785978	0.135245	not	258.824	246 - 274	1.97924	1.06402	0.333694	0.491874	not	reliable
YLR392C	ART10	132.964	97.6 - 174	176.316	166 - 187	1.3547	1.1614	0.159648	0.233325	not	270.783	252 - 289	2.08106	1.26532	0.0478881	0.0920336	not	388.998	377 - 402	2.98933	1.60704	0.00254652	0.0426857	induced	not
YLR010C	TEN1	133.125	120 - 151	143.299	139 - 148	1.07707	0.923383	0.139861	0.209773	not	247.78	210 - 285	1.85754	1.12941	0.11006	0.1755	not	356.356	278 - 457	2.67021	1.43548	0.00254345	0.0426857	not	reliable
YHR178W	STB5	133.152	125 - 141	172.881	166 - 179	1.29884	1.11351	0.0701996	0.122735	not	219.558	212 - 226	1.6509	1.00377	0.943812	0.954956	not	250.198	223 - 281	1.88236	1.01194	0.817679	0.887676	not	reliable
YDL138W	RGT2	133.286	113 - 155	180.27	172 - 188	1.36432	1.16964	0.0533767	0.0996364	not	244.452	223 - 270	1.85333	1.12685	0.114677	0.181787	not	298.315	273 - 323	2.26123	1.21561	0.0232667	0.099318	not	reliable
YDR436W	PPZ2	133.309	108 - 160	212.362	195 - 229	1.60939	1.37975	0.00484781	0.0195293	not	352.054	318 - 396	2.67378	1.6257	0.000616144	0.00747835	induced	316.793	304 - 332	2.4057	1.29328	0.0104096	0.0712837	not	reliable
YMR114C	YMR114C	133.452	101 - 177	161.515	115 - 226	1.19477	1.02429	0.825012	0.864206	not	228.158	210 - 246	1.7097	1.03953	0.587106	0.665865	not	285.369	252 - 321	2.13683	1.14874	0.0983689	0.225791	not	reliable
YMR106C	YKU80	133.485	109 - 165	127.128	124 - 129	0.951698	0.815901	0.014239	0.0383321	not	209.138	152 - 275	1.56158	0.94947	0.547556	0.629338	not	192.788	177 - 212	1.44283	0.775649	0.00822198	0.065477	not	reliable
YJR039W	YJR039W	133.564	122 - 147	170.003	155 - 187	1.27475	1.09286	0.100549	0.162116	not	246.926	210 - 286	1.8459	1.12234	0.121172	0.189585	not	276.047	228 - 341	2.06448	1.10985	0.152513	0.298275	not	reliable
YML050W	AIM32	134.043	133 - 134	122.508	115 - 129	0.914846	0.784307	0.00423296	0.0180555	not	216.915	205 - 228	1.62208	0.986252	0.803141	0.847493	not	236.585	217 - 258	1.76974	0.951397	0.379167	0.534405	not	reliable
YOR010C	TIR2	134.074	129 - 138	128.037	125 - 131	0.958358	0.821611	0.00773176	0.025953	not	140.364	99 - 198	1.04696	0.636569	0.00183547	0.0112106	repressed	218.667	168 - 285	1.62931	0.875902	0.148695	0.293753	not	reliable
YPL123C	RNY1	134.612	109 - 166	120.28	96.5 - 150	0.905495	0.776291	0.0215213	0.0511879	not	185.765	177 - 194	1.39718	0.849512	0.0817401	0.139464	not	255.088	230 - 287	1.91886	1.03156	0.701137	0.806816	not	not
YIL024C	YIL024C	134.777	111 - 168	189.061	154 - 230	1.39419	1.19526	0.0597169	0.108465	not	268.039	244 - 296	1.98567	1.20732	0.0294543	0.0638058	not	299.53	300 - 300	2.22263	1.19487	0.0220506	0.097284	not	not
YDL194W	SNF3	134.912	133 - 135	164.959	109 - 248	1.20748	1.03519	0.751628	0.804849	not	268.374	255 - 283	1.99567	1.2134	0.011124	0.032539	not	283.477	266 - 302	2.10925	1.13391	0.0443024	0.141092	not	reliable
YOR040W	GLO4	134.979	119 - 150	117.52	107 - 130	0.87788	0.752616	0.00273862	0.0145579	not	149.097	94.6 - 229	1.10294	0.670606	0.0113471	0.0330141	not	155.153	134 - 180	1.15644	0.62169	0.000608888	0.026911	repressed	not
YOL033W	MSE1	135.091	99.5 - 174	129.013	112 - 148	0.96866	0.830443	0.102997	0.165122	not	197.542	184 - 212	1.48824	0.904877	0.313027	0.406066	not	246.349	129 - 466	1.80262	0.969069	0.859675	0.917419	not	not
YJL047C-A	YJL047C-A	135.317	62.3 - 238	138.202	108 - 177	1.07706	0.923374	0.649551	0.717832	not	138.923	117 - 168	1.07814	0.655525	0.0504227	0.095798	not	184.732	130 - 256	1.42688	0.767075	0.192621	0.345586	not	reliable
YOR071C	NRT1	135.717	125 - 147	215.848	191 - 242	1.58788	1.3613	0.0018298	0.0118017	not	230.415	196 - 269	1.69434	1.03019	0.668858	0.738734	not	158.243	137 - 184	1.16562	0.626624	0.000292129	0.0207466	repressed	reliable
YGR133W	PEX4	135.937	101 - 173	151.981	142 - 161	1.13472	0.97281	0.759756	0.811861	not	216.48	216 - 217	1.61987	0.984909	0.861884	0.89054	not	216.881	193 - 243	1.623	0.872506	0.156181	0.302902	not	reliable
YBR098W	MMS4	136.259	122 - 150	195.64	182 - 208	1.44426	1.23818	0.0118653	0.033877	not	297.115	288 - 305	2.19779	1.33629	0.00252135	0.0130235	not	327.922	316 - 338	2.42561	1.30398	0.00350968	0.0492224	not	reliable
YLL063C	AYT1	136.268	75.5 - 231	197.667	184 - 214	1.45657	1.24873	0.121888	0.188052	not	235.148	154 - 352	1.71001	1.03971	0.811399	0.853026	not	364.985	295 - 446	2.68771	1.44488	0.0293436	0.111015	not	reliable
YGL113W	SLD3	136.47	107 - 173	152.846	101 - 230	1.1155	0.956327	0.652134	0.720264	not	191.486	176 - 210	1.40037	0.851452	0.0659663	0.117519	not	205.715	157 - 268	1.49888	0.805784	0.0516859	0.15464	not	reliable
YLR431C	ATG23	136.481	109 - 177	150.505	133 - 167	1.09845	0.941714	0.420461	0.508582	not	211.309	161 - 270	1.5372	0.934644	0.481224	0.569058	not	305.092	292 - 321	2.23544	1.20175	0.0231567	0.0991206	not	reliable
YDR416W	SYF1	136.627	135 - 136	184.055	145 - 227	1.35178	1.1589	0.05146	0.0968257	not	250.875	NA	1.84249	1.12026	0.0675069	0.119505	not	299.525	291 - 305	2.20115	1.18332	0.0123994	0.0767331	not	reliable
YJL162C	JJJ2	137.195	108 - 168	151.389	145 - 157	1.11707	0.957675	0.59078	0.66829	not	204.703	203 - 207	1.51296	0.919906	0.310947	0.404303	not	229.838	205 - 258	1.69876	0.913239	0.275788	0.433534	not	reliable
YBL005W-A	YBL005W-A	137.742	92.2 - 198	123.109	86.1 - 171	0.90554	0.776329	0.122388	0.188514	not	201.96	184 - 218	1.50785	0.916797	0.456318	0.545768	not	172.458	154 - 193	1.28724	0.692009	0.015857	0.0843379	not	not
YHR202W	YHR202W	138.14	100 - 188	143.357	120 - 171	1.03794	0.889836	0.180769	0.25832	not	185.163	184 - 186	1.33959	0.814496	0.0385137	0.0777977	not	242.72	181 - 323	1.7468	0.939062	0.543461	0.680951	not	not
YJR035W	RAD26	138.175	108 - 179	176.818	139 - 225	1.26864	1.08762	0.386243	0.475014	not	266.35	255 - 277	1.92755	1.17198	0.0546398	0.101459	not	268.098	230 - 312	1.93828	1.042	0.580203	0.710925	not	not
YDR393W	SHE9	138.241	120 - 162	147.118	136 - 162	1.06464	0.912731	0.121402	0.187455	not	230.047	230 - 230	1.6644	1.01198	0.830698	0.866708	not	295.866	NA	2.13858	1.14968	0.061715	0.169694	not	reliable
YPL164C	MLH3	138.451	103 - 176	175.958	167 - 185	1.29254	1.10811	0.251512	0.335745	not	235.333	186 - 291	1.71873	1.04502	0.680029	0.748297	not	245.211	211 - 289	1.79757	0.966354	0.716378	0.817726	not	reliable
YCR020C	PET18	138.538	101 - 181	141.797	128 - 158	1.04346	0.894573	0.24938	0.333649	not	203.784	175 - 243	1.49915	0.911509	0.345919	0.439766	not	242.837	168 - 335	1.77558	0.954535	0.688347	0.798132	not	not
YNL148C	ALF1	138.608	110 - 179	121.231	99.1 - 148	0.874364	0.749602	0.00750461	0.0253971	not	179.809	143 - 222	1.28991	0.78429	0.0333173	0.0701574	not	189.111	175 - 205	1.36427	0.733417	0.00324464	0.0475432	not	not
YBR280C	SAF1	138.71	126 - 155	165.899	126 - 212	1.19677	1.02601	0.693914	0.756073	not	209.352	159 - 279	1.49802	0.910821	0.335187	0.429296	not	273.593	241 - 313	1.97277	1.06054	0.329664	0.487217	not	reliable
YLR284C	ECI1	139.076	115 - 168	148.863	122 - 180	1.06262	0.910992	0.282858	0.367696	not	204.065	148 - 273	1.45144	0.882502	0.263465	0.354769	not	330.437	260 - 418	2.36883	1.27346	0.0180445	0.0879067	not	reliable
YDR409W	SIZ1	139.076	115 - 169	170.472	109 - 256	1.20238	1.03082	0.802658	0.846826	not	232.507	210 - 251	1.67217	1.01671	0.780377	0.828419	not	281.068	230 - 348	2.01681	1.08422	0.285516	0.443648	not	not
YDR022C	CIS1	139.3	118 - 159	154.031	110 - 214	1.11462	0.955574	0.617598	0.690889	not	172.182	166 - 177	1.24911	0.759479	0.00565482	0.0210281	not	207.011	183 - 232	1.50115	0.807001	0.0178559	0.0875488	not	reliable
YNL211C	YNL211C	139.421	104 - 195	170.521	150 - 194	1.21793	1.04414	0.627037	0.699235	not	244.452	NA	1.75378	1.06633	0.432976	0.523496	not	308.226	242 - 397	2.20399	1.18484	0.108923	0.24013	not	reliable
YLR141W	RRN5	139.933	118 - 168	118.83	111 - 128	0.849078	0.727924	0.00141837	0.010903	not	173.888	167 - 182	1.24286	0.755681	0.00301063	0.0145167	not	297.699	269 - 327	2.12729	1.14361	0.0590257	0.165929	not	not
YLR313C	SPH1	140.012	131 - 151	204.672	202 - 207	1.46375	1.25488	0.00277048	0.0146234	not	282.894	250 - 320	2.02008	1.22824	0.0137344	0.0374912	not	344.028	254 - 455	2.44934	1.31674	0.0128908	0.0779718	not	reliable
YJL047C	RTT101	140.012	129 - 151	175	145 - 211	1.24435	1.0668	0.381161	0.470196	not	238.496	233 - 245	1.7063	1.03746	0.471525	0.560283	not	283.439	227 - 353	2.02046	1.08618	0.280135	0.438296	not	not
YAL062W	GDH3	140.057	138 - 140	143.773	108 - 190	1.02884	0.882039	0.121206	0.187205	not	175.762	163 - 192	1.25993	0.766056	0.0017277	0.0109305	not	226.683	169 - 299	1.61462	0.868004	0.132178	0.27185	not	reliable
YGR058W	PEF1	140.124	125 - 153	123.225	119 - 127	0.884403	0.758209	0.00406433	0.0176287	not	172.214	NA	1.23126	0.748629	0.0141476	0.0381031	not	269.939	243 - 299	1.94098	1.04345	0.48912	0.636261	not	not
YER040W	GLN3	140.191	111 - 168	231.868	216 - 247	1.67291	1.43421	0.00315718	0.0155278	not	301.365	270 - 341	2.17817	1.32436	0.0096672	0.0294758	not	313.177	232 - 420	2.25157	1.21042	0.0916857	0.215791	not	not
YPL247C	YPL247C	140.213	108 - 172	116.604	84.7 - 153	0.835039	0.715888	0.0219087	0.0518691	not	159.87	123 - 203	1.15558	0.70261	0.00844572	0.0269934	not	219.269	156 - 304	1.57277	0.845506	0.18637	0.338832	not	not
YCR038C	BUD5	140.438	76.5 - 244	142.241	95.2 - 209	1.0407	0.892204	0.545721	0.626466	not	207.414	180 - 241	1.54606	0.940031	0.690092	0.756134	not	280.95	205 - 378	2.07801	1.11711	0.522706	0.663471	not	not
YGL250W	RMR1	140.536	130 - 150	131.239	109 - 154	0.940137	0.80599	0.00987759	0.0301661	not	223.573	211 - 237	1.59928	0.972392	0.653885	0.725598	not	272.348	228 - 323	1.94625	1.04628	0.519182	0.660513	not	not
YIR030C	DCG1	140.558	127 - 154	157.485	145 - 171	1.12942	0.968268	0.577514	0.656303	not	141.951	122 - 164	1.01399	0.616521	0.000901497	0.00821073	repressed	129.906	107 - 157	0.931355	0.500687	3.7255e-05	0.008215	repressed	reliable
YAR068W	YAR068W	140.561	110 - 169	139.83	138 - 142	1.00775	0.863957	0.0956174	0.156078	not	125.893	112 - 144	0.908374	0.552307	0.000297845	0.0060363	repressed	104.711	78.1 - 143	0.752874	0.404738	7.48722e-05	0.0112027	repressed	reliable
YJL058C	BIT61	140.783	88.9 - 211	170.588	139 - 208	1.24232	1.06505	0.64694	0.715785	not	251.31	226 - 274	1.84081	1.11924	0.390602	0.483212	not	287.887	196 - 409	2.09672	1.12718	0.419314	0.573275	not	not
YOR373W	NUD1	141.18	110 - 184	174.914	141 - 214	1.23822	1.06154	0.445155	0.531741	not	233.394	200 - 267	1.65261	1.00482	0.945718	0.956712	not	254.515	228 - 284	1.80203	0.968756	0.645398	0.763676	not	reliable
YBL086C	YBL086C	141.438	122 - 158	205.738	175 - 246	1.46877	1.25919	0.0143664	0.0385651	not	260.798	196 - 356	1.85513	1.12795	0.206739	0.292402	not	277.348	242 - 316	1.97895	1.06386	0.373906	0.529796	not	reliable
YNL230C	ELA1	141.449	118 - 162	123.001	95.7 - 158	0.870113	0.745958	0.0218009	0.051649	not	180.345	170 - 189	1.28702	0.782529	0.0129954	0.0362795	not	250.773	228 - 278	1.79021	0.9624	0.591257	0.718593	not	reliable
YAL027W	SAW1	141.458	87.8 - 220	162.655	145 - 179	1.15362	0.989009	0.919172	0.938079	not	209.89	187 - 239	1.48853	0.905054	0.383297	0.476678	not	279.826	NA	1.98179	1.06539	0.581674	0.712264	not	reliable
YGR205W	YGR205W	141.716	128 - 156	163.039	158 - 169	1.15147	0.987168	0.784515	0.8322	not	261.365	260 - 263	1.84689	1.12294	0.0545567	0.101371	not	256.924	211 - 309	1.81054	0.973326	0.68997	0.799522	not	reliable
YGL131C	SNT2	141.727	131 - 154	212.227	206 - 220	1.49999	1.28596	0.00162682	0.0112348	not	359.212	297 - 438	2.52858	1.53742	0.00101637	0.00858222	induced	290.864	256 - 333	2.05356	1.10397	0.123568	0.260812	not	reliable
YJL185C	YJL185C	141.749	136 - 149	160.062	152 - 169	1.13174	0.970254	0.516094	0.599143	not	194.464	190 - 199	1.37483	0.835922	0.0123429	0.0350459	not	176.778	159 - 197	1.2503	0.672149	0.00022506	0.0191316	not	reliable
YKL134C	2012-10-01	141.839	129 - 152	180.904	171 - 191	1.28278	1.09974	0.151686	0.22418	not	290.389	277 - 304	2.06165	1.25352	0.00936497	0.0290078	not	250.155	228 - 277	1.77542	0.954448	0.472015	0.622022	not	reliable
YJR061W	YJR061W	141.906	114 - 169	157.034	125 - 198	1.12051	0.960624	0.625118	0.697757	not	195.971	160 - 236	1.398	0.850005	0.0801489	0.137329	not	278.573	256 - 302	1.98827	1.06888	0.382988	0.538583	not	not
YKL132C	RMA1	141.928	109 - 171	179.918	143 - 219	1.2864	1.10285	0.281094	0.365824	not	209.854	168 - 261	1.49212	0.907236	0.354459	0.447905	not	242.736	201 - 295	1.73079	0.930458	0.444877	0.596827	not	reliable
YFL033C	RIM15	142.15	130 - 156	174.347	147 - 205	1.22866	1.05335	0.346453	0.435694	not	228.475	220 - 240	1.6088	0.978178	0.679515	0.748022	not	273.598	250 - 299	1.92646	1.03564	0.525816	0.665774	not	not
YKL197C	PEX1	142.172	135 - 150	261.483	257 - 265	1.84302	1.58004	7.51273e-05	0.00626999	induced	382.935	373 - 394	2.69941	1.64129	7.46478e-05	0.0060363	induced	252.66	231 - 275	1.78145	0.957691	0.394098	0.549967	not	reliable
YIL013C	PDR11	142.371	94.6 - 211	200.952	188 - 213	1.41315	1.21151	0.0746723	0.128533	not	299.858	292 - 308	2.10776	1.28155	0.0345618	0.0720007	not	246.536	179 - 340	1.72395	0.926778	0.511083	0.655235	not	reliable
YOR062C	YOR062C	142.394	101 - 203	185.674	177 - 194	1.30283	1.11693	0.233241	0.315979	not	274.53	245 - 307	1.92514	1.17052	0.130268	0.201036	not	306.922	296 - 318	2.15653	1.15933	0.123628	0.260812	not	reliable
YDR323C	PEP7	142.528	122 - 168	168.059	150 - 186	1.17974	1.01141	0.832305	0.869363	not	225.949	219 - 232	1.58575	0.964162	0.517007	0.601191	not	250.166	240 - 262	1.75551	0.943743	0.321291	0.479605	not	reliable
YPR005C	HAL1	142.708	128 - 155	145.885	118 - 177	1.02365	0.877582	0.148852	0.221147	not	254.639	232 - 277	1.79667	1.09241	0.216556	0.303029	not	362.429	318 - 407	2.55931	1.37586	0.00219332	0.0404086	not	not
YGR112W	SHY1	143.03	135 - 152	155.643	118 - 203	1.07928	0.925277	0.394355	0.482681	not	210.472	150 - 304	1.45621	0.885402	0.282279	0.374167	not	321.086	278 - 371	2.24704	1.20799	0.0162767	0.0845373	not	not
YBR183W	YPC1	143.442	131 - 157	167.426	147 - 187	1.16953	1.00265	0.956088	0.967549	not	276.168	226 - 341	1.91965	1.16718	0.0760932	0.131796	not	253.849	221 - 292	1.7699	0.951481	0.42288	0.576062	not	not
YGL007C-A	YGL007C-A	143.477	140 - 148	155.852	127 - 189	1.08135	0.927054	0.342916	0.432193	not	194.481	171 - 225	1.35538	0.824094	0.0247851	0.0564567	not	309.995	284 - 341	2.16601	1.16443	0.0252943	0.103745	not	reliable
YGR075C	PRP38	143.487	142 - 145	159.969	128 - 197	1.11883	0.959182	0.470413	0.554997	not	204.101	198 - 210	1.42759	0.867996	0.026205	0.0588156	not	302.691	219 - 415	2.10477	1.1315	0.179837	0.330783	not	reliable
YOR114W	YOR114W	143.599	122 - 163	131.031	119 - 143	0.922382	0.790768	0.0111823	0.0326821	not	220.83	214 - 227	1.55413	0.944936	0.4165	0.50748	not	267.482	NA	1.88093	1.01117	0.878226	0.928831	not	not
YDL069C	CBS1	143.8	92.5 - 218	142.191	116 - 172	1.01476	0.869969	0.337276	0.426191	not	174.825	166 - 187	1.25691	0.764223	0.0704523	0.123866	not	305.723	277 - 337	2.19705	1.18111	0.219554	0.377675	not	reliable
YCR026C	NPP1	144.243	121 - 171	217.9	183 - 259	1.50328	1.28878	0.0113092	0.0329038	not	272.424	225 - 327	1.88786	1.14785	0.0694505	0.122486	not	274.789	204 - 365	1.89346	1.01791	0.841485	0.905181	not	reliable
YGR109W-B	YGR109W-B	144.266	126 - 167	217.618	147 - 316	1.48659	1.27447	0.0576003	0.105706	not	323.381	288 - 362	2.24346	1.36406	0.00132208	0.00962381	not	410.73	247 - 632	2.80838	1.50976	0.012391	0.0767331	not	not
YER150W	SPI1	144.4	135 - 152	161.355	152 - 170	1.12193	0.961844	0.527037	0.609098	not	268.424	241 - 294	1.86831	1.13596	0.0830617	0.141185	not	293.966	280 - 310	2.04902	1.10154	0.123179	0.260449	not	reliable
YOL114C	YOL114C	144.566	106 - 199	97.5893	79.3 - 118	0.675147	0.578811	0.000599746	0.00800039	repressed	150.319	119 - 186	1.03875	0.631576	0.00185987	0.0112349	repressed	218.081	197 - 238	1.5075	0.810415	0.0370286	0.127315	not	reliable
YDR259C	YAP6	145.112	126 - 168	124.326	108 - 143	0.853222	0.731476	0.00362986	0.0167005	not	214.774	214 - 215	1.48035	0.900076	0.0961488	0.158455	not	366.168	361 - 371	2.52518	1.35751	0.0010803	0.0322848	not	not
YBR231C	SWC5	145.445	110 - 190	159.953	143 - 180	1.09973	0.94281	0.42217	0.509776	not	202.695	203 - 203	1.3932	0.84709	0.0578627	0.106119	not	259.354	173 - 380	1.76488	0.948781	0.646476	0.764631	not	reliable
YOL128C	YGK3	145.773	120 - 171	112.891	87.7 - 143	0.783931	0.672073	0.00295047	0.015157	not	164.738	132 - 206	1.14334	0.69517	0.00424171	0.0175508	not	274.917	202 - 377	1.90069	1.02179	0.822307	0.891642	not	reliable
YOR193W	PEX27	145.913	116 - 183	163.34	153 - 176	1.11616	0.956899	0.52761	0.609634	not	242.61	214 - 272	1.65901	1.00871	0.904957	0.926302	not	271.224	189 - 390	1.84643	0.992623	0.938434	0.964528	not	reliable
YDR350C	ATP22	145.936	119 - 181	214.481	173 - 256	1.46114	1.25265	0.0242824	0.0558072	not	299.189	273 - 324	2.04741	1.24486	0.0143326	0.0384196	not	310.605	270 - 356	2.12621	1.14303	0.0767144	0.193086	not	reliable
YLR091W	GEP5	146.137	132 - 157	130.346	92 - 179	0.897079	0.769076	0.0186068	0.0458363	not	133.17	111 - 158	0.918018	0.558171	0.000139609	0.0060363	repressed	256.289	192 - 325	1.75751	0.944822	0.527695	0.667258	not	reliable
YJR008W	YJR008W	146.138	132 - 159	109.506	91.2 - 132	0.750484	0.643398	0.00147335	0.0109521	repressed	227.002	190 - 273	1.55966	0.948302	0.501188	0.58775	not	298.877	256 - 346	2.05784	1.10627	0.177956	0.328606	not	not
YPR152C	URN1	146.25	109 - 185	179.451	138 - 230	1.24722	1.06925	0.501044	0.58431	not	240.704	233 - 250	1.67485	1.01834	0.832863	0.868167	not	305.723	278 - 337	2.12632	1.14309	0.162004	0.309815	not	not
YIL095W	PRK1	146.917	143 - 151	206.458	168 - 248	1.40187	1.20184	0.0352655	0.0731073	not	335.29	310 - 367	2.28684	1.39044	0.00121396	0.00920395	not	345.275	241 - 481	2.34177	1.25891	0.0383954	0.129573	not	not
YDR495C	VPS3	146.917	141 - 151	175.083	149 - 206	1.18934	1.01963	0.774088	0.824373	not	285.103	266 - 305	1.94539	1.18283	0.019988	0.0482305	not	271.208	209 - 350	1.84553	0.99214	0.914471	0.950034	not	reliable
YGL063W	PUS2	147.006	130 - 161	147.96	129 - 171	1.01537	0.870492	0.0586622	0.107152	not	228.425	226 - 230	1.56704	0.952788	0.443831	0.533768	not	263.725	233 - 298	1.80757	0.971732	0.668595	0.782441	not	reliable
YER170W	ADK2	147.441	129 - 164	133.992	129 - 138	0.915356	0.784744	0.00843572	0.0273229	not	202.813	186 - 219	1.38818	0.844037	0.0312425	0.0668767	not	280.393	263 - 297	1.9185	1.03137	0.624096	0.745364	not	reliable
YER111C	SWI4	147.74	137 - 160	179.886	174 - 185	1.21965	1.04562	0.349318	0.438275	not	262.855	203 - 331	1.77916	1.08176	0.280014	0.3716	not	348.985	241 - 503	2.34772	1.26211	0.0443327	0.141106	not	not
YGR153W	YGR153W	147.875	130 - 165	114.351	97.4 - 133	0.780656	0.669265	0.000854027	0.00920087	not	158.463	137 - 184	1.07831	0.655633	0.00155779	0.0103786	repressed	357.528	358 - 358	2.44079	1.31214	0.00424426	0.0512948	not	reliable
YGR194C	XKS1	148.108	125 - 175	214.471	203 - 226	1.44642	1.24003	0.00781421	0.0261676	not	320.602	305 - 335	2.16404	1.31577	0.0031388	0.0148272	not	248.284	199 - 307	1.67134	0.898498	0.184561	0.336724	not	reliable
YHR116W	COX23	148.119	130 - 170	128.946	123 - 135	0.869501	0.745432	0.0018362	0.0118017	not	195.904	185 - 207	1.32371	0.804836	0.00587944	0.0215044	not	218.771	155 - 310	1.46901	0.789724	0.0322613	0.11742	not	not
YKL108W	SLD2	148.564	133 - 168	182.255	172 - 192	1.2259	1.05098	0.363657	0.452253	not	265.096	NA	1.78613	1.086	0.169503	0.248498	not	319.255	300 - 344	2.15071	1.1562	0.0288158	0.109979	not	not
YOR284W	HUA2	148.609	138 - 159	164.825	132 - 207	1.10283	0.945468	0.485053	0.568593	not	186.467	146 - 232	1.25075	0.760479	0.0121613	0.0347353	not	258.811	254 - 264	1.74608	0.938674	0.214612	0.371662	not	reliable
YBR054W	YRO2	148.632	143 - 154	195.839	173 - 221	1.32231	1.13363	0.0459145	0.0889358	not	285.47	233 - 343	1.91871	1.16661	0.0718732	0.12596	not	183.568	157 - 213	1.23872	0.665924	0.000261715	0.0192241	repressed	not
YER058W	PET117	148.699	135 - 158	175.897	116 - 252	1.18616	1.01691	0.858392	0.889442	not	201.39	175 - 227	1.36055	0.827235	0.0294173	0.0637732	not	219.306	189 - 252	1.48272	0.797096	0.0125129	0.0770109	not	reliable
YHR156C	LIN1	148.9	102 - 216	176.318	NA	1.19534	1.02478	0.86407	0.894597	not	240.605	NA	1.65689	1.00742	0.946099	0.956898	not	321.744	318 - 325	2.21641	1.19152	0.136768	0.27786	not	reliable
YDL197C	ASF2	149.153	89.2 - 243	177.734	176 - 178	1.19497	1.02446	0.830731	0.868345	not	273.209	249 - 297	1.83881	1.11802	0.346736	0.440508	not	263.165	218 - 312	1.76898	0.950988	0.66816	0.782441	not	reliable
YLL007C	YLL007C	149.223	121 - 177	192.145	167 - 222	1.30606	1.1197	0.187437	0.265967	not	276.337	270 - 283	1.8782	1.14197	0.124051	0.193075	not	364.318	357 - 372	2.47632	1.33125	0.00853817	0.0656735	not	not
YMR182W-A	YMR182W-A	149.234	114 - 188	176.073	134 - 228	1.19661	1.02587	0.781247	0.830745	not	213.153	NA	1.44665	0.879588	0.208105	0.293966	not	294.603	NA	2.00439	1.07754	0.360379	0.51918	not	reliable
YMR172W	HOT1	149.388	126 - 175	192.378	170 - 214	1.28846	1.10461	0.113148	0.177374	not	236.087	211 - 261	1.58104	0.9613	0.497353	0.58398	not	227.962	NA	1.52648	0.820618	0.0103314	0.0711744	not	not
YMR096W	SNZ1	149.388	129 - 179	220.574	178 - 277	1.47584	1.26525	0.0141659	0.0382081	not	291.041	260 - 324	1.94556	1.18294	0.035612	0.0735116	not	315.581	302 - 328	2.11351	1.1362	0.050904	0.153216	not	reliable
YNR034W	SOL1	149.567	137 - 159	169.628	168 - 171	1.14143	0.978562	0.707907	0.768359	not	268.441	258 - 277	1.8087	1.09972	0.139687	0.212556	not	361.222	NA	2.43393	1.30846	0.00298883	0.0462512	not	reliable
YBR223C	TDP1	149.567	134 - 161	132.849	129 - 137	0.894514	0.766877	0.00320746	0.0156059	not	180.881	164 - 200	1.2188	0.741049	0.00215622	0.0120616	not	245.23	235 - 256	1.65173	0.887953	0.0821602	0.202161	not	reliable
YOR258W	HNT3	149.657	117 - 183	173.898	154 - 196	1.17417	1.00663	0.939053	0.954066	not	205.939	155 - 278	1.38309	0.840943	0.161139	0.238525	not	295.863	252 - 344	2.00385	1.07725	0.384653	0.539897	not	reliable
YER041W	YEN1	149.744	116 - 193	221.268	214 - 228	1.4756	1.26504	0.0138518	0.0375398	not	321.069	252 - 397	2.1315	1.29599	0.0291297	0.0632468	not	340.255	333 - 345	2.27223	1.22153	0.0235988	0.100207	not	reliable
YGR196C	FYV8	149.923	145 - 154	167.361	130 - 216	1.10919	0.950918	0.564142	0.643823	not	294.153	268 - 320	1.96642	1.19562	0.0183353	0.0454844	not	274.925	188 - 394	1.82871	0.983097	0.844074	0.906106	not	reliable
YMR140W	SIP5	150.01	89.3 - 230	198.051	173 - 227	1.32036	1.13196	0.31694	0.405293	not	276.738	258 - 297	1.84987	1.12475	0.328693	0.422233	not	289.611	NA	1.93131	1.03825	0.759828	0.848654	not	reliable
YJR155W	AAD10	150.091	119 - 189	192.003	188 - 196	1.29803	1.11282	0.204235	0.28445	not	244.468	240 - 249	1.65305	1.00508	0.949194	0.959371	not	277.883	218 - 352	1.8705	1.00556	0.955013	0.975186	not	reliable
YHR168W	MTG2	150.302	135 - 165	166.125	160 - 173	1.10488	0.94723	0.321463	0.410056	not	248.232	232 - 260	1.6531	1.00511	0.923585	0.939194	not	293.358	287 - 300	1.95531	1.05116	0.320472	0.47858	not	reliable
YOL095C	HMI1	150.369	149 - 150	179.553	170 - 190	1.19703	1.02622	0.626104	0.69847	not	281.857	267 - 299	1.88114	1.14376	0.0446702	0.0870923	not	285.992	245 - 331	1.90828	1.02587	0.66306	0.778549	not	reliable
YNL304W	YPT11	150.526	119 - 191	131.466	106 - 164	0.879971	0.754409	0.0289374	0.0632747	not	190.35	NA	1.28425	0.780844	0.0212635	0.0504897	not	268.655	232 - 311	1.80964	0.972842	0.751211	0.842525	not	reliable
YJR010W	MET3	150.593	105 - 211	158.82	155 - 163	1.07649	0.922886	0.436289	0.523473	not	252.314	243 - 262	1.71309	1.04159	0.683009	0.750845	not	436.515	404 - 470	2.9629	1.59283	0.0032161	0.0475432	induced	reliable
YPL269W	KAR9	150.658	123 - 184	206.34	205 - 208	1.36889	1.17357	0.0267863	0.060025	not	296.313	242 - 358	1.96506	1.19479	0.0371332	0.0760897	not	226.139	197 - 260	1.5004	0.8066	0.0117624	0.0749189	not	reliable
YIR031C	DAL7	150.79	86.6 - 268	259.768	156 - 409	1.70014	1.45755	0.0706534	0.123287	not	355.165	337 - 376	2.37255	1.44255	0.0338394	0.0709399	not	324.228	299 - 348	2.16705	1.16499	0.284445	0.442627	not	reliable
YJR021C	REC107	150.817	78 - 268	148.479	130 - 166	1.03568	0.887899	0.505672	0.588494	not	222.906	150 - 319	1.55221	0.943767	0.756136	0.809522	not	337.766	314 - 367	2.36512	1.27147	0.190831	0.344177	not	reliable
YDR255C	RMD5	151.17	139 - 165	160.888	158 - 163	1.06508	0.913101	0.101385	0.163139	not	262.118	240 - 285	1.73772	1.05656	0.292525	0.38504	not	305.627	225 - 426	2.01271	1.08201	0.372818	0.52875	not	not
YOR019W	YOR019W	151.26	145 - 155	152.883	98.6 - 227	0.998155	0.855729	0.216724	0.298174	not	257.9	209 - 311	1.70823	1.03863	0.618252	0.692854	not	292.116	279 - 307	1.94283	1.04445	0.43538	0.587494	not	reliable
YER116C	SLX8	151.339	128 - 177	133.265	113 - 158	0.890746	0.763647	0.00918984	0.028793	not	213.185	201 - 228	1.42499	0.866419	0.07557	0.130991	not	305.67	269 - 346	2.04065	1.09703	0.241972	0.401181	not	reliable
YJR094C	IME1	151.35	125 - 178	160.221	129 - 194	1.06394	0.912123	0.337441	0.426304	not	212.166	148 - 292	1.41436	0.859952	0.143876	0.217236	not	207.032	159 - 269	1.38071	0.742257	0.012544	0.0770149	not	reliable
YLR251W	SYM1	151.616	142 - 160	175.631	141 - 218	1.16079	0.99516	0.937268	0.952937	not	264.042	248 - 280	1.74639	1.06183	0.247002	0.336175	not	380.364	365 - 397	2.51541	1.35226	0.00077748	0.0288883	not	reliable
YDR363W	ESC2	151.676	151 - 152	187.61	138 - 252	1.22865	1.05334	0.575463	0.654761	not	287.344	238 - 343	1.896	1.1528	0.0833331	0.141371	not	290.933	241 - 341	1.92412	1.03439	0.585652	0.714095	not	reliable
YOR034C-A	YOR034C-A	152.062	146 - 157	343.931	322 - 365	2.26592	1.9426	1.57018e-05	0.00626999	induced	432.589	366 - 511	2.85254	1.73439	8.99532e-05	0.0060363	induced	421.618	347 - 521	2.7752	1.49192	0.000786287	0.0288883	not	reliable
YMR187C	YMR187C	152.241	119 - 188	156.751	151 - 162	1.04313	0.894288	0.205623	0.28575	not	253.351	245 - 261	1.68824	1.02648	0.749879	0.804804	not	313.083	290 - 343	2.08679	1.12184	0.189578	0.342792	not	reliable
YNL254C	RTC4	152.35	125 - 186	173.963	137 - 215	1.14105	0.978232	0.765743	0.817641	not	253.134	251 - 255	1.6608	1.0098	0.877857	0.903578	not	240.919	238 - 243	1.58126	0.850071	0.0344875	0.122449	not	reliable
YDL154W	MSH5	152.53	150 - 153	181.595	175 - 187	1.19625	1.02556	0.609411	0.684302	not	231.736	199 - 271	1.5219	0.925343	0.289979	0.382544	not	241.513	212 - 279	1.58893	0.854192	0.0392752	0.131224	not	reliable
YBR259W	YBR259W	153.02	136 - 168	217.465	215 - 220	1.43294	1.22847	0.0125399	0.0351291	not	325.721	311 - 341	2.14591	1.30475	0.00574753	0.0212055	not	309.385	290 - 329	2.03904	1.09617	0.177082	0.327312	not	reliable
YLR263W	RED1	153.042	129 - 173	184.406	180 - 190	1.21611	1.04259	0.530215	0.612213	not	292.431	288 - 297	1.93021	1.1736	0.0485274	0.0930726	not	314.363	283 - 346	2.07461	1.11529	0.147216	0.29175	not	reliable
YDR425W	SNX41	153.32	141 - 167	172.797	161 - 184	1.12696	0.966157	0.519749	0.602151	not	254.655	211 - 304	1.65819	1.00821	0.906387	0.927207	not	308.135	268 - 358	2.01151	1.08137	0.205988	0.361823	not	not
YHL044W	YHL044W	153.353	148 - 158	140.53	125 - 159	0.919711	0.788478	0.00276053	0.0146057	not	154.45	138 - 174	1.00844	0.613148	0.000234235	0.0060363	repressed	228.559	199 - 260	1.49311	0.802683	0.00958963	0.0688739	not	reliable
YLR040C	YLR040C	153.387	151 - 155	191.471	148 - 244	1.24352	1.06608	0.453443	0.539818	not	206.842	142 - 292	1.33916	0.814231	0.0907587	0.151024	not	394.597	325 - 475	2.5801	1.38704	0.00247285	0.0423806	not	reliable
YGR013W	SNU71	153.432	142 - 164	166.718	156 - 179	1.09206	0.936234	0.316792	0.405196	not	256.128	243 - 271	1.6805	1.02177	0.730628	0.789379	not	300.732	265 - 341	1.97228	1.06028	0.389586	0.545285	not	not
YDR421W	ARO80	153.62	120 - 193	267.403	228 - 312	1.74035	1.49203	0.00135999	0.0107582	not	335.86	327 - 344	2.18612	1.3292	0.0046777	0.0187108	not	336.577	304 - 370	2.18937	1.17698	0.0504812	0.152441	not	reliable
YGL222C	EDC1	153.821	150 - 157	382.209	349 - 416	2.49841	2.14192	1.10818e-05	0.00626999	induced	518.076	430 - 633	3.38203	2.05633	4.09332e-05	0.0060363	induced	239.069	238 - 240	1.5626	0.840037	0.0131342	0.0782194	not	reliable
YJL056C	ZAP1	153.877	137 - 169	169.628	168 - 171	1.11062	0.95215	0.43155	0.518777	not	252.648	211 - 302	1.65032	1.00343	0.964658	0.972807	not	221.196	202 - 243	1.44989	0.779448	0.00610345	0.0583661	not	not
YBL060W	YEL1	154.035	119 - 199	158.685	140 - 183	1.03019	0.883193	0.111879	0.175677	not	226.569	195 - 259	1.4705	0.894086	0.159143	0.236064	not	292.769	260 - 332	1.89962	1.02122	0.768662	0.854472	not	not
YNL162W-A	YNL162W-A	154.268	147 - 160	186.31	117 - 284	1.18932	1.01961	0.876979	0.90432	not	289.285	267 - 314	1.88489	1.14605	0.0564353	0.104075	not	380.449	275 - 548	2.46389	1.32456	0.0210067	0.0946182	not	reliable
YDR332W	IRC3	154.556	134 - 175	246.189	215 - 275	1.58782	1.36126	0.00286808	0.0149373	not	281.088	267 - 295	1.81879	1.10586	0.111507	0.177408	not	350.179	281 - 428	2.26127	1.21564	0.0288754	0.109979	not	reliable
YOL097W-A	YOL097W-A	154.668	153 - 155	153.948	114 - 211	0.998195	0.855764	0.0767376	0.13094	not	205.54	187 - 229	1.33533	0.811901	0.0068432	0.0236754	not	332.852	329 - 339	2.1625	1.16254	0.0206723	0.0942164	not	reliable
YEL072W	RMD6	154.78	129 - 183	163.224	118 - 214	1.05428	0.903848	0.360097	0.448713	not	197.108	195 - 199	1.28811	0.783191	0.0132069	0.0366033	not	346.485	269 - 444	2.25683	1.21325	0.0648866	0.174968	not	reliable
YMR179W	SPT21	154.78	129 - 181	176.217	167 - 186	1.1499	0.985826	0.842364	0.877166	not	292.466	228 - 372	1.9086	1.16046	0.114718	0.1818	not	309.411	296 - 325	2.02299	1.08754	0.253775	0.412576	not	reliable
YER076C	YER076C	154.968	132 - 181	164.441	142 - 190	1.05639	0.905651	0.189127	0.267894	not	219.173	214 - 224	1.41377	0.859594	0.0378986	0.0769674	not	258.198	258 - 258	1.66711	0.896224	0.0767743	0.193086	not	reliable
YLR024C	UBR2	155.136	146 - 163	179.694	168 - 191	1.16611	0.999719	0.995791	0.997378	not	302.518	278 - 329	1.96044	1.19198	0.0289408	0.0630786	not	328.452	245 - 437	2.11926	1.13929	0.167763	0.317029	not	not
YIL045W	PIG2	155.503	151 - 159	184.573	181 - 188	1.1907	1.0208	0.659249	0.725854	not	271.753	246 - 303	1.75101	1.06464	0.306739	0.399842	not	274.861	266 - 286	1.77424	0.953814	0.343225	0.502402	not	reliable
YNL309W	STB1	155.559	148 - 162	167.86	148 - 191	1.08148	0.927167	0.282682	0.367551	not	244.887	235 - 258	1.58461	0.963469	0.50446	0.590853	not	304.519	239 - 377	1.965	1.05637	0.455046	0.606772	not	reliable
YPL041C	YPL041C	155.747	124 - 203	179.277	172 - 186	1.14909	0.985125	0.830404	0.868324	not	238.547	191 - 297	1.52997	0.930246	0.369752	0.463706	not	256.958	251 - 264	1.64968	0.88685	0.117868	0.252358	not	reliable
YLR127C	APC2	156.248	131 - 183	208.975	198 - 222	1.33792	1.14701	0.038593	0.0781532	not	258.37	246 - 272	1.65436	1.00588	0.915274	0.933603	not	337.776	329 - 347	2.16279	1.16269	0.0286696	0.109841	not	reliable
YGR221C	TOS2	156.671	131 - 186	190.102	181 - 198	1.21359	1.04043	0.471917	0.556075	not	271.218	267 - 275	1.7316	1.05284	0.377206	0.470655	not	284.074	241 - 333	1.81054	0.973331	0.684563	0.79603	not	reliable
YDR499W	LCD1	156.806	155 - 157	221.525	177 - 273	1.41795	1.21562	0.0208902	0.0501294	not	326.961	285 - 376	2.09387	1.27311	0.00429292	0.0177103	not	306.954	282 - 337	1.96568	1.05673	0.308299	0.467616	not	reliable
YGL144C	ROG1	157.184	147 - 167	215.589	208 - 222	1.37312	1.17719	0.0134896	0.0368406	not	284.15	283 - 284	1.81171	1.10155	0.0876264	0.146959	not	303.234	NA	1.93387	1.03963	0.421883	0.575411	not	reliable
YDR104C	SPO71	157.229	154 - 159	191.763	159 - 233	1.21748	1.04376	0.544312	0.625102	not	313.007	295 - 331	1.99727	1.21437	0.0105849	0.0314268	not	231.645	204 - 261	1.47712	0.794083	0.00740709	0.0623861	not	reliable
YER175C	TMT1	157.363	132 - 188	172.062	133 - 224	1.10565	0.947884	0.54051	0.621619	not	280.988	275 - 286	1.80779	1.09916	0.219277	0.305626	not	304.513	248 - 365	1.95499	1.05098	0.551349	0.687181	not	reliable
YHR176W	FMO1	158.367	104 - 236	155.234	143 - 169	1.00276	0.859676	0.219172	0.300966	not	214.036	172 - 267	1.37925	0.838609	0.197339	0.281769	not	240.252	187 - 315	1.54782	0.832091	0.186125	0.33861	not	reliable
YLR152C	YLR152C	158.487	151 - 165	218.273	175 - 274	1.37972	1.18285	0.041716	0.0826336	not	248.064	230 - 265	1.56795	0.953339	0.39619	0.488522	not	328.516	313 - 346	2.07869	1.11748	0.0547808	0.159047	not	reliable
YLR082C	SRL2	158.566	148 - 168	182.488	169 - 198	1.15561	0.990716	0.874799	0.90273	not	231.437	205 - 259	1.4692	0.893298	0.0868714	0.14606	not	416.782	376 - 458	2.64421	1.4215	0.000977691	0.031964	not	reliable
YBR013C	YBR013C	158.81	132 - 188	193.882	136 - 262	1.20635	1.03422	0.732824	0.789646	not	240.002	197 - 287	1.51076	0.918566	0.218049	0.30459	not	325.449	320 - 329	2.04996	1.10204	0.12184	0.258198	not	reliable
YHR033W	YHR033W	159.356	153 - 164	251.949	213 - 295	1.58604	1.35973	0.00159295	0.0111867	not	322.175	315 - 329	2.02753	1.23277	0.00589867	0.0215245	not	370.512	337 - 415	2.33111	1.25318	0.00539737	0.0561962	not	not
YDR406W	PDR15	159.488	106 - 242	259.146	214 - 312	1.62707	1.3949	0.0169403	0.0429467	not	275.114	207 - 360	1.715	1.04275	0.729729	0.788866	not	230.475	185 - 285	1.44402	0.776291	0.0493664	0.150683	not	reliable
YOR060C	YOR060C	159.589	118 - 212	132.132	129 - 135	0.827227	0.709191	0.00303154	0.0153519	not	195.369	154 - 248	1.22258	0.743349	0.0107554	0.031783	not	261.177	153 - 448	1.60626	0.86351	0.315576	0.474202	not	reliable
YBL059W	YBL059W	159.633	125 - 201	161.23	146 - 177	1.00621	0.862637	0.0778047	0.132509	not	217.232	179 - 260	1.35456	0.823596	0.0535644	0.100185	not	256.91	202 - 327	1.60115	0.860762	0.127009	0.265079	not	reliable
YEL064C	AVT2	159.723	143 - 178	176.082	161 - 192	1.10386	0.946352	0.280018	0.364842	not	265.463	264 - 267	1.66371	1.01156	0.822845	0.861282	not	314.336	NA	1.97071	1.05944	0.264967	0.423166	not	reliable
YCR081W	SRB8	159.768	150 - 168	203.821	184 - 226	1.27926	1.09672	0.0986715	0.159681	not	285.505	274 - 299	1.79193	1.08952	0.11686	0.184369	not	322.986	309 - 334	2.027	1.0897	0.112275	0.244925	not	not
YNR007C	ATG3	159.813	158 - 161	164.825	131 - 203	1.02749	0.880877	0.151004	0.223289	not	231.435	201 - 268	1.4503	0.881808	0.0979359	0.160541	not	367.404	360 - 377	2.30939	1.2415	0.00444535	0.0517343	not	reliable
YDR254W	CHL4	159.97	129 - 198	143.024	135 - 150	0.90706	0.777632	0.016015	0.0414971	not	202.562	195 - 211	1.28499	0.781296	0.0183061	0.045432	not	213.156	NA	1.35199	0.726816	0.00596385	0.0577595	not	reliable
YDR173C	ARG82	159.97	128 - 193	173.848	168 - 180	1.10229	0.945009	0.472541	0.556695	not	205.137	191 - 220	1.29966	0.790215	0.026883	0.0599566	not	294.563	257 - 335	1.86574	1.003	0.971577	0.981643	not	reliable
YPL005W	AEP3	160.113	133 - 187	180.612	157 - 206	1.12412	0.963724	0.575676	0.654872	not	236.723	205 - 271	1.47893	0.899215	0.109096	0.174258	not	295.25	253 - 354	1.84238	0.990443	0.879887	0.928997	not	reliable
YMR196W	YMR196W	160.213	154 - 164	203.545	179 - 230	1.27475	1.09285	0.117661	0.183129	not	432.3	316 - 572	2.68527	1.63269	0.00152307	0.010269	induced	311.847	285 - 344	1.95164	1.04918	0.375335	0.530511	not	not
YIR025W	MND2	160.225	156 - 162	176.633	166 - 187	1.10631	0.94845	0.27899	0.363755	not	285.153	257 - 317	1.78312	1.08417	0.204203	0.28954	not	345.816	329 - 361	2.16626	1.16456	0.0192512	0.0908844	not	reliable
YBR021W	FUR4	161.472	149 - 173	161.33	157 - 166	1.00052	0.857757	0.0155389	0.0407266	not	219.072	173 - 274	1.35192	0.821987	0.0429912	0.0846652	not	281.595	232 - 336	1.74251	0.936756	0.352408	0.511913	not	not
YMR065W	KAR5	162.363	158 - 165	187.108	183 - 192	1.15511	0.990289	0.837537	0.873199	not	267.822	250 - 285	1.65327	1.00521	0.9243	0.939415	not	353.843	334 - 374	2.18627	1.17532	0.0168354	0.085365	not	reliable
YDL107W	MSS2	162.396	158 - 165	146.628	111 - 190	0.897446	0.76939	0.0254029	0.0577952	not	242.243	238 - 246	1.49903	0.911437	0.108803	0.173938	not	339.066	277 - 407	2.09356	1.12548	0.111714	0.244148	not	reliable
YMR201C	RAD14	162.441	150 - 176	168.545	123 - 226	1.03234	0.885034	0.244897	0.329246	not	240.27	216 - 268	1.4899	0.905885	0.129813	0.200497	not	268.713	236 - 307	1.66485	0.895006	0.11324	0.24653	not	reliable
YGL096W	TOS8	162.464	145 - 181	208.091	206 - 210	1.29127	1.10702	0.122152	0.188357	not	339.17	260 - 434	2.09133	1.27157	0.0350629	0.072723	not	388.372	387 - 389	2.41136	1.29633	0.00434564	0.0514808	not	not
YIL173W	VTH1	162.587	123 - 206	243.151	217 - 270	1.523	1.30569	0.0219686	0.0519893	not	378.821	359 - 397	2.37277	1.44268	0.00573161	0.0211744	not	330.392	317 - 348	2.06916	1.11236	0.25295	0.41159	not	reliable
YLR254C	NDL1	162.685	138 - 192	189.627	166 - 218	1.16138	0.995666	0.947327	0.961263	not	298.672	258 - 345	1.83623	1.11646	0.104179	0.167833	not	478.477	430 - 528	2.94093	1.58101	0.000234854	0.0191316	induced	reliable
YNR057C	BIO4	162.719	144 - 182	190.902	177 - 207	1.17456	1.00697	0.88765	0.912496	not	270.735	199 - 369	1.6588	1.00858	0.916788	0.934081	not	342.728	331 - 353	2.10866	1.1336	0.0422103	0.137374	not	reliable
YOR275C	RIM20	162.764	153 - 172	212.861	209 - 219	1.3105	1.12351	0.0394716	0.0794206	not	284.768	255 - 317	1.75072	1.06447	0.304452	0.397594	not	310.573	244 - 418	1.90377	1.02345	0.761249	0.849738	not	reliable
YHR182W	YHR182W	162.864	151 - 175	223.977	191 - 263	1.38454	1.18698	0.0303301	0.0653513	not	321.405	316 - 326	1.98635	1.20774	0.0152269	0.0401321	not	254.491	250 - 260	1.57336	0.845825	0.0205748	0.0939994	not	reliable
YJR004C	SAG1	162.876	149 - 177	233.752	194 - 278	1.44578	1.23948	0.0142212	0.0383294	not	288.683	273 - 304	1.78449	1.085	0.211816	0.298093	not	285.939	262 - 313	1.7678	0.95035	0.41252	0.565764	not	not
YDR282C	YDR282C	163.175	149 - 175	167.125	135 - 206	1.02571	0.879356	0.0670793	0.118563	not	291.996	286 - 298	1.7928	1.09005	0.117929	0.185692	not	231.639	199 - 267	1.4191	0.762896	0.00469861	0.0529389	not	reliable
YPL233W	NSL1	163.422	130 - 205	138.036	116 - 167	0.858164	0.735713	0.0113257	0.0329165	not	192.928	96.6 - 354	1.17725	0.715787	0.0649371	0.116074	not	323.002	288 - 360	2.00716	1.07903	0.382611	0.538186	not	reliable
YPR066W	UBA3	163.422	125 - 204	119.255	117 - 121	0.740192	0.634574	0.00165472	0.0113306	repressed	195.936	168 - 231	1.213	0.737525	0.0190002	0.0466429	not	297.078	280 - 316	1.84696	0.992909	0.930496	0.958622	not	reliable
YJL048C	UBX6	163.487	128 - 203	180.728	168 - 193	1.10529	0.947578	0.403141	0.49078	not	264.726	217 - 319	1.61294	0.980692	0.809869	0.852367	not	373.547	351 - 397	2.28442	1.22808	0.0166479	0.0851642	not	reliable
YLR117C	CLF1	163.565	141 - 189	244.905	201 - 292	1.48979	1.27722	0.0132178	0.0363442	not	318.327	314 - 322	1.94762	1.18419	0.0166644	0.0425404	not	381.576	371 - 391	2.33502	1.25529	0.00395399	0.0512948	not	reliable
YLR382C	NAM2	163.688	157 - 170	218.675	197 - 241	1.33946	1.14834	0.0440719	0.0864922	not	366.958	327 - 411	2.24881	1.36732	0.00227754	0.0123205	not	392.03	342 - 449	2.4046	1.29269	0.00411674	0.0512948	not	reliable
YLR456W	YLR456W	164.055	156 - 171	212.295	207 - 217	1.29606	1.11112	0.0603798	0.109423	not	341.681	327 - 357	2.08642	1.26858	0.00378104	0.0164126	not	552.456	537 - 571	3.37619	1.815	1.86461e-05	0.00789987	induced	reliable
YJL099W	CHS6	164.145	152 - 175	243.068	221 - 268	1.49054	1.27786	0.00383841	0.0171757	not	405.703	359 - 454	2.48327	1.50987	0.000678537	0.00771295	induced	324.204	316 - 333	1.98806	1.06876	0.243966	0.402715	not	reliable
YGL227W	VID30	164.89	151 - 177	232.761	200 - 270	1.40814	1.20721	0.0213803	0.0509596	not	397.322	376 - 419	2.4124	1.46678	0.000364603	0.00624932	not	379.812	293 - 486	2.29716	1.23493	0.0311473	0.114923	not	reliable
YPR013C	YPR013C	164.958	162 - 167	202.904	184 - 224	1.23209	1.05629	0.340013	0.429171	not	276.471	276 - 277	1.68277	1.02315	0.654235	0.725845	not	321.712	290 - 359	1.95686	1.05199	0.375446	0.530511	not	reliable
YDR247W	VHS1	164.991	155 - 174	160.154	143 - 178	0.972102	0.833394	0.0299612	0.0648306	not	229.965	177 - 298	1.39945	0.850889	0.0541202	0.100891	not	269.891	237 - 305	1.64321	0.883375	0.0795372	0.197742	not	not
YOL159C-A	YOL159C-A	165.271	107 - 247	152.865	152 - 153	0.951086	0.815376	0.121137	0.187182	not	223.84	193 - 260	1.38991	0.84509	0.211041	0.297297	not	302.014	285 - 323	1.88121	1.01132	0.922415	0.954685	not	reliable
YNL245C	CWC25	165.392	161 - 168	150.822	133 - 167	0.912315	0.782138	0.00714602	0.0246601	not	204.068	155 - 263	1.23704	0.752142	0.00554306	0.0208058	not	275.525	213 - 350	1.66752	0.896442	0.169806	0.319184	not	reliable
YOL028C	YAP7	165.95	136 - 197	125.937	94.3 - 164	0.759412	0.651052	0.00603386	0.0223522	repressed	186.903	177 - 197	1.13984	0.693043	0.00203079	0.01168	not	318.661	311 - 325	1.94358	1.04485	0.533415	0.671271	not	reliable
YDR221W	GTB1	166.073	114 - 228	304.2	282 - 326	1.86996	1.60313	0.00369818	0.0168413	induced	432.957	405 - 470	2.66716	1.62168	0.00302455	0.0145288	induced	362.56	253 - 513	2.21523	1.19088	0.206478	0.362324	not	not
YPR104C	FHL1	166.485	119 - 228	191.761	155 - 232	1.17568	1.00792	0.938472	0.953647	not	276.22	268 - 287	1.69339	1.02961	0.764294	0.815785	not	281.657	261 - 303	1.72738	0.92862	0.450305	0.60211	not	reliable
YGL179C	TOS3	166.995	145 - 190	218.999	198 - 244	1.31264	1.12534	0.0625383	0.112255	not	288.298	274 - 302	1.72666	1.04984	0.394713	0.487125	not	330.4	302 - 359	1.97958	1.0642	0.275729	0.433534	not	reliable
YJR135C	MCM22	167.073	163 - 170	151.088	141 - 162	0.90687	0.77747	0.00156224	0.0111441	not	239.399	223 - 255	1.43608	0.873164	0.0384372	0.0777542	not	314.968	297 - 334	1.89092	1.01654	0.734791	0.830531	not	reliable
YPL069C	BTS1	167.073	163 - 170	177.551	155 - 205	1.06132	0.909879	0.165547	0.240394	not	260.461	247 - 273	1.56382	0.950827	0.319928	0.413131	not	343.386	278 - 412	2.05696	1.1058	0.155344	0.30183	not	reliable
YFR027W	ECO1	167.474	157 - 180	176.534	167 - 187	1.0542	0.903781	0.0880062	0.146272	not	256.781	232 - 284	1.53651	0.934227	0.212035	0.298327	not	292.103	265 - 322	1.74627	0.938776	0.271075	0.429107	not	reliable
YOR368W	RAD17	167.519	167 - 167	159.787	149 - 171	0.957033	0.820475	0.00508198	0.0202136	not	229.661	178 - 288	1.36608	0.830598	0.0664691	0.118074	not	268.671	253 - 287	1.60915	0.865061	0.026308	0.106133	not	reliable
YPL074W	YTA6	167.853	148 - 191	262.494	209 - 331	1.55456	1.33275	0.0084177	0.0273151	not	375.961	302 - 465	2.23847	1.36103	0.00346759	0.0156293	not	331.66	272 - 393	1.97355	1.06096	0.384244	0.539714	not	reliable
YPL124W	SPC29	167.886	152 - 185	157.936	146 - 171	0.939196	0.805183	0.00902356	0.0285284	not	252.615	246 - 259	1.50699	0.916277	0.118068	0.185807	not	347.047	339 - 355	2.07049	1.11307	0.0646011	0.174897	not	reliable
YBL088C	TEL1	168.032	152 - 184	230.108	220 - 241	1.37992	1.18302	0.0222948	0.052454	not	309.21	291 - 326	1.85289	1.12659	0.0936283	0.154933	not	279.205	238 - 327	1.67276	0.899257	0.139763	0.281919	not	reliable
YBR168W	PEX32	168.298	151 - 188	170.479	148 - 195	1.00931	0.86529	0.0638454	0.114095	not	248.435	190 - 323	1.47451	0.896526	0.161925	0.239489	not	339.002	317 - 363	2.01649	1.08405	0.148059	0.292805	not	reliable
YDL176W	YDL176W	168.578	131 - 210	234.112	203 - 269	1.40518	1.20468	0.0784528	0.133292	not	289.737	288 - 291	1.74624	1.06175	0.476128	0.564448	not	289.731	215 - 391	1.73623	0.933381	0.523256	0.66387	not	reliable
YNR068C	YNR068C	169.991	146 - 195	297.26	275 - 323	1.75008	1.50036	0.000285845	0.00660363	induced	432.583	293 - 615	2.51373	1.52839	0.0077233	0.0255158	induced	309.411	295 - 325	1.82155	0.97925	0.688334	0.798132	not	not
YMR164C	MSS11	170.092	168 - 172	203.779	185 - 222	1.20246	1.03088	0.53801	0.619626	not	286.024	282 - 291	1.68758	1.02608	0.602997	0.679663	not	327.932	298 - 356	1.93431	1.03987	0.454763	0.606772	not	reliable
YMR257C	PET111	170.17	155 - 183	196.998	166 - 233	1.16596	0.999594	0.994788	0.99655	not	332.613	292 - 382	1.96354	1.19386	0.0403378	0.0806472	not	287.863	222 - 367	1.69849	0.913092	0.2586	0.417539	not	reliable
YNL278W	CAF120	170.817	118 - 240	190.493	152 - 237	1.14184	0.978908	0.849514	0.882596	not	279.315	NA	1.67559	1.01878	0.859072	0.888934	not	265.625	NA	1.59239	0.856051	0.178759	0.329443	not	not
YDR419W	RAD30	170.859	150 - 191	290.606	258 - 326	1.6976	1.45537	0.000709843	0.008747	not	382.802	380 - 385	2.24218	1.36329	0.00106333	0.00876744	not	310.552	212 - 445	1.80418	0.969909	0.74705	0.840022	not	reliable
YFL054C	YFL054C	170.859	152 - 193	183.171	154 - 218	1.07296	0.919859	0.181481	0.259076	not	291.893	219 - 393	1.6945	1.03029	0.75257	0.806927	not	288.364	219 - 378	1.68009	0.903198	0.243845	0.402715	not	reliable
YLR067C	PET309	170.882	155 - 187	207.073	191 - 226	1.21359	1.04043	0.42751	0.515235	not	275.602	256 - 296	1.61526	0.982107	0.722219	0.78207	not	339.002	321 - 363	1.98647	1.06791	0.218632	0.376662	not	reliable
YMR034C	YMR034C	170.882	155 - 187	219.7	208 - 232	1.28739	1.10369	0.0751434	0.129104	not	253.654	214 - 299	1.48546	0.903185	0.12343	0.192267	not	285.907	224 - 355	1.66906	0.897271	0.173165	0.322921	not	reliable
YDR443C	SSN2	171.039	153 - 187	277.327	247 - 316	1.63425	1.40106	0.00152728	0.0110464	not	446.978	331 - 580	2.62637	1.59688	0.00112271	0.00896902	induced	340.185	271 - 428	1.99682	1.07347	0.384414	0.539783	not	reliable
YBR056W-A	YBR056W-A	171.439	159 - 183	136.143	134 - 138	0.798376	0.684457	0.000425003	0.00723738	not	289.182	187 - 427	1.67225	1.01675	0.886316	0.910461	not	680.797	675 - 686	3.99639	2.14842	8.80972e-06	0.00789987	induced	not
YIL077C	YIL077C	171.571	124 - 228	211.887	169 - 274	1.22485	1.05008	0.624432	0.697155	not	319.633	294 - 350	1.8633	1.13292	0.144911	0.21839	not	322.981	318 - 327	1.88283	1.01219	0.872053	0.926607	not	reliable
YGL229C	SAP4	171.706	150 - 199	228.505	163 - 316	1.32755	1.13812	0.166691	0.241869	not	297.952	266 - 332	1.73638	1.05575	0.348864	0.442429	not	315.53	267 - 375	1.83525	0.986611	0.835209	0.901	not	reliable
YPL258C	THI21	171.739	158 - 188	188.258	160 - 224	1.09758	0.94097	0.306466	0.393679	not	248.216	239 - 260	1.44743	0.880064	0.0389046	0.0783355	not	247.717	233 - 261	1.44455	0.776576	0.00195703	0.0389752	not	reliable
YJL100W	LSB6	171.84	167 - 175	188.283	169 - 210	1.10118	0.944052	0.280224	0.365027	not	242.443	211 - 276	1.41403	0.859752	0.0542702	0.101104	not	239.749	170 - 329	1.3941	0.749454	0.0129022	0.0779718	not	reliable
YDR118W	APC4	171.863	161 - 180	211.043	195 - 226	1.23533	1.05906	0.291497	0.377105	not	307.955	302 - 314	1.80255	1.09598	0.126365	0.196136	not	306.917	288 - 325	1.79587	0.96544	0.529406	0.668472	not	reliable
YLR165C	PUS5	172.131	117 - 248	185.123	183 - 187	1.10371	0.946225	0.621866	0.694701	not	241.709	NA	1.44162	0.876531	0.278227	0.37001	not	408.124	394 - 425	2.4356	1.30935	0.0451681	0.142641	not	reliable
YPR047W	MSF1	172.151	152 - 193	195.33	165 - 231	1.13566	0.97361	0.645864	0.714734	not	328.112	258 - 414	1.89643	1.15306	0.120602	0.189007	not	389.651	336 - 461	2.26244	1.21627	0.0171037	0.0858331	not	not
YOL069W	NUF2	172.199	105 - 267	234.631	169 - 315	1.39482	1.1958	0.263168	0.348101	not	349.949	245 - 496	2.09309	1.27264	0.140995	0.214201	not	378.656	216 - 630	2.23475	1.20138	0.320372	0.47858	not	reliable
YLL033W	IRC19	172.762	112 - 256	175.065	146 - 209	1.01513	0.870281	0.205404	0.285561	not	200.236	180 - 221	1.15869	0.704504	0.0143484	0.0384437	not	360.612	360 - 362	2.09133	1.12428	0.256031	0.414804	not	reliable
YDL039C	PRM7	173.177	157 - 189	250.274	249 - 251	1.45467	1.24711	0.00697504	0.0243674	not	169.738	137 - 202	0.981638	0.596852	0.000909707	0.00825891	repressed	160.128	133 - 188	0.930479	0.500216	4.12815e-05	0.008215	repressed	reliable
YFR046C	CNN1	173.466	161 - 187	156.483	120 - 202	0.902743	0.773931	0.0078435	0.0262014	not	245.221	226 - 269	1.41614	0.861034	0.0228401	0.0532363	not	321.766	286 - 355	1.85723	0.998429	0.976008	0.984362	not	reliable
YIL136W	OM45	173.698	123 - 236	141.605	123 - 167	0.815528	0.699161	0.00447521	0.0186116	not	189.914	166 - 218	1.09027	0.662901	0.00396524	0.0168637	repressed	274.875	246 - 305	1.5824	0.850685	0.0841041	0.20504	not	not
YHR118C	ORC6	173.734	136 - 216	239.785	166 - 335	1.38405	1.18656	0.182498	0.26033	not	361.623	342 - 386	2.11519	1.28607	0.0205448	0.0491961	not	431.543	418 - 447	2.52397	1.35686	0.00859237	0.0656735	not	reliable
YIL055C	YIL055C	173.757	131 - 224	182.921	164 - 202	1.07178	0.918853	0.353235	0.441524	not	327.83	307 - 352	1.92086	1.16791	0.116249	0.18366	not	357.528	358 - 358	2.09484	1.12616	0.201824	0.356612	not	reliable
YJL118W	YJL118W	173.869	112 - 252	173.598	169 - 178	1.02602	0.879615	0.296272	0.382321	not	294.839	263 - 328	1.7422	1.05929	0.634432	0.70832	not	335.309	NA	1.98493	1.06708	0.575366	0.707064	not	reliable
YAL034W-A	MTW1	173.889	160 - 190	159.37	151 - 167	0.915616	0.784967	0.00429892	0.0182133	not	235.553	181 - 304	1.35403	0.82327	0.0264932	0.0592508	not	344.542	309 - 380	1.98335	1.06623	0.251758	0.41024	not	reliable
YBL080C	PET112	173.891	107 - 262	173.265	155 - 193	1.02416	0.87802	0.328088	0.416536	not	240.202	234 - 246	1.42489	0.86636	0.267961	0.358974	not	273.595	244 - 308	1.62171	0.871814	0.292153	0.451479	not	reliable
YMR294W	JNM1	174.012	161 - 185	179.169	176 - 182	1.03528	0.887557	0.055208	0.102379	not	266.215	232 - 313	1.53451	0.933009	0.337846	0.431735	not	336.545	333 - 340	1.94605	1.04618	0.40401	0.5587	not	reliable
YML068W	ITT1	174.023	159 - 187	192.846	183 - 203	1.11552	0.956351	0.415077	0.503361	not	275.635	241 - 311	1.59429	0.969358	0.599339	0.676637	not	388.985	385 - 394	2.25043	1.20981	0.0111868	0.0732318	not	reliable
YPR079W	MRL1	174.057	151 - 191	200.385	197 - 203	1.16061	0.994999	0.931162	0.948172	not	229.127	203 - 262	1.32457	0.805361	0.0207827	0.0496397	not	376.681	340 - 420	2.18116	1.17257	0.0435224	0.139861	not	reliable
YHR002W	LEU5	174.256	148 - 205	227.531	210 - 244	1.3062	1.11982	0.0755425	0.129537	not	266.551	237 - 294	1.53018	0.930375	0.242404	0.331168	not	334.693	328 - 340	1.9215	1.03298	0.55814	0.692437	not	reliable
YPR160W	GPH1	174.357	167 - 182	231.336	169 - 311	1.31604	1.12826	0.206152	0.286275	not	706.979	666 - 755	4.06351	2.47068	3.13044e-06	0.0060363	induced	440.097	335 - 571	2.51863	1.35399	0.0070013	0.0615657	not	not
YPR081C	GRS2	174.368	168 - 180	221.909	191 - 262	1.27641	1.09428	0.136984	0.206388	not	272.289	271 - 273	1.566	0.952152	0.339741	0.433666	not	324.201	312 - 340	1.86495	1.00258	0.956791	0.975944	not	reliable
YCR032W	BPH1	174.401	172 - 174	255.262	235 - 277	1.46684	1.25754	0.00492709	0.0197314	not	362.125	327 - 399	2.08538	1.26794	0.00371156	0.0162607	not	367.485	266 - 502	2.10293	1.13052	0.191097	0.344395	not	reliable
YHL014C	YLF2	174.424	168 - 180	179.719	178 - 181	1.03466	0.887023	0.052168	0.0979622	not	255.143	211 - 306	1.46894	0.893137	0.115316	0.182594	not	280.98	233 - 341	1.61476	0.868079	0.07839	0.195923	not	reliable
YER129W	SAK1	174.693	120 - 246	228.931	172 - 298	1.34109	1.14973	0.273021	0.357694	not	303.891	285 - 326	1.78371	1.08453	0.457848	0.547251	not	311.858	299 - 326	1.83005	0.983816	0.877202	0.928831	not	reliable
YPL236C	YPL236C	175.36	152 - 198	191.943	137 - 271	1.10174	0.944538	0.533432	0.614979	not	287.814	279 - 296	1.65683	1.00738	0.906658	0.927316	not	310.632	311 - 311	1.78822	0.96133	0.529977	0.668798	not	reliable
YMR113W	FOL3	175.427	139 - 216	164.691	153 - 177	0.949349	0.813888	0.0398909	0.0799275	not	214.371	NA	1.23393	0.750248	0.0193305	0.047167	not	309.443	NA	1.78593	0.960099	0.629484	0.749865	not	reliable
YHL028W	WSC4	175.825	122 - 257	177.332	115 - 266	1.00399	0.860729	0.227819	0.310044	not	281.226	150 - 464	1.57488	0.957551	0.766113	0.817264	not	293.395	NA	1.6677	0.896538	0.24316	0.402491	not	reliable
YCL024W	KCC4	175.96	146 - 210	304.399	289 - 319	1.73014	1.48327	0.000448354	0.00723738	not	464.879	342 - 617	2.63071	1.59952	0.00177656	0.0110234	induced	399.5	368 - 434	2.2701	1.22038	0.0140727	0.0797548	not	reliable
YHR134W	WSS1	176.083	170 - 181	178.669	160 - 198	1.01422	0.869503	0.0473715	0.090979	not	268.023	265 - 271	1.52629	0.928013	0.168231	0.247211	not	349.502	340 - 359	1.99097	1.07032	0.183887	0.33619	not	reliable
YOR111W	YOR111W	176.116	174 - 177	184.89	183 - 187	1.05364	0.9033	0.0689592	0.121053	not	261.297	238 - 288	1.48753	0.904446	0.125494	0.194998	not	365.507	314 - 415	2.08207	1.1193	0.0827001	0.203282	not	reliable
YOR292C	YOR292C	176.15	167 - 184	186.007	179 - 192	1.06171	0.910212	0.100971	0.162612	not	250.925	228 - 274	1.43075	0.869921	0.0522887	0.0984175	not	285.35	273 - 299	1.6293	0.875897	0.0387917	0.130326	not	reliable
YNL234W	YNL234W	176.229	149 - 204	243.667	186 - 311	1.39466	1.19566	0.0651299	0.115841	not	329.269	293 - 370	1.88712	1.1474	0.0780382	0.134527	not	320.449	248 - 404	1.82993	0.983753	0.842822	0.905588	not	reliable
YIL092W	YIL092W	176.506	168 - 184	214.162	184 - 251	1.21661	1.04302	0.449151	0.535609	not	324.601	322 - 328	1.84384	1.12109	0.053271	0.0997684	not	327.916	324 - 331	1.86313	1.0016	0.972867	0.982201	not	reliable
YDL113C	ATG20	176.528	174 - 178	241.518	223 - 261	1.37009	1.17459	0.020109	0.0485638	not	318.211	269 - 369	1.80845	1.09957	0.12255	0.191317	not	359.429	294 - 428	2.03871	1.09599	0.191801	0.345156	not	reliable
YBR241C	YBR241C	176.596	164 - 187	188.684	167 - 210	1.07552	0.922058	0.178855	0.256167	not	276.838	238 - 316	1.57366	0.95681	0.52372	0.607	not	373.579	356 - 393	2.12909	1.14458	0.0441827	0.140946	not	reliable
YPL219W	PCL8	176.761	138 - 222	212.945	205 - 224	1.2044	1.03254	0.62661	0.698897	not	332.08	287 - 379	1.87808	1.1419	0.1003	0.163533	not	372.42	269 - 520	2.09383	1.12562	0.249391	0.408373	not	reliable
YFL060C	SNO3	176.952	173 - 180	189.484	164 - 217	1.07444	0.921133	0.153864	0.22657	not	224.476	200 - 255	1.26971	0.772008	0.00564023	0.0210014	not	321.819	234 - 422	1.81403	0.975206	0.765457	0.853119	not	reliable
YFL065C	YFL065C	177.142	142 - 216	193.697	182 - 206	1.10674	0.94882	0.500608	0.584042	not	299.456	NA	1.7091	1.03916	0.657433	0.728677	not	403.151	NA	2.30654	1.23997	0.0272227	0.107448	not	reliable
YBL029W	YBL029W	177.764	163 - 191	230.073	182 - 292	1.29535	1.11052	0.154254	0.227026	not	334.153	325 - 343	1.88333	1.14509	0.029611	0.0640703	not	601.796	561 - 650	3.39142	1.8232	2.13041e-05	0.00789987	induced	reliable
YDR066C	RTR2	177.843	173 - 181	181.921	159 - 209	1.02338	0.877353	0.075576	0.129537	not	266.099	261 - 271	1.50306	0.913884	0.116096	0.18347	not	380.369	357 - 402	2.14834	1.15493	0.0281347	0.109068	not	reliable
YNL218W	MGS1	177.876	168 - 187	232.479	162 - 321	1.29817	1.11293	0.303096	0.389705	not	271.922	239 - 309	1.53779	0.935003	0.274575	0.365955	not	309.401	308 - 312	1.75027	0.940926	0.27305	0.431147	not	reliable
YGL125W	MET13	177.921	155 - 199	206.374	167 - 254	1.16197	0.996172	0.962076	0.972217	not	294.906	290 - 300	1.67111	1.01607	0.795382	0.84119	not	413.102	350 - 494	2.33743	1.25658	0.0164962	0.0848346	not	reliable
YPR167C	MET16	177.955	150 - 209	213.252	177 - 260	1.21073	1.03797	0.612903	0.686791	not	294.354	284 - 305	1.67081	1.01588	0.81628	0.856749	not	545.056	533 - 558	3.09549	1.6641	0.000241964	0.0191316	induced	reliable
YOR022C	YOR022C	178.031	133 - 234	251.324	234 - 269	1.4115	1.2101	0.0299017	0.0647986	not	295.927	295 - 297	1.66182	1.01041	0.88329	0.908179	not	289.659	288 - 290	1.62702	0.87467	0.0912768	0.215295	not	reliable
YLR238W	FAR10	178.145	NA	250.542	201 - 311	1.43491	1.23017	0.12794	0.195363	not	362.225	NA	2.08761	1.2693	0.0662524	0.117763	not	568.432	NA	3.26961	1.75771	0.00255088	0.0426857	induced	reliable
YKL072W	STB6	178.4	151 - 211	299.763	287 - 315	1.69771	1.45547	0.00170578	0.011513	not	384.389	314 - 474	2.1707	1.31982	0.0169891	0.0431068	not	364.316	361 - 367	2.06606	1.11069	0.161062	0.308384	not	reliable
YDR179C	CSN9	178.611	162 - 193	153.3	115 - 196	0.850345	0.72901	0.0116487	0.0335463	not	273.428	205 - 366	1.5284	0.92929	0.352193	0.44524	not	447.687	338 - 588	2.49923	1.34356	0.00815541	0.0652429	not	reliable
YJL070C	YJL070C	178.655	172 - 184	223.286	202 - 247	1.25356	1.07469	0.171128	0.247165	not	299.356	276 - 322	1.67854	1.02058	0.709834	0.772099	not	304.476	291 - 320	1.7093	0.918902	0.114784	0.248409	not	not
YOR129C	AFI1	178.678	177 - 180	260.164	228 - 296	1.46152	1.25297	0.00480822	0.0194113	not	353.427	273 - 453	1.98106	1.20452	0.0326319	0.0691046	not	331.65	284 - 375	1.86083	1.00036	0.994939	0.996936	not	reliable
YMR262W	YMR262W	178.911	142 - 230	163.088	122 - 217	0.909626	0.779832	0.0269096	0.0601834	not	230.131	228 - 232	1.2859	0.78185	0.00952198	0.0292221	not	366.765	347 - 389	2.04972	1.10191	0.173636	0.323373	not	reliable
YNL133C	FYV6	179.123	176 - 180	217.958	197 - 242	1.2188	1.04489	0.442048	0.5287	not	278.412	252 - 307	1.56104	0.949137	0.338454	0.432414	not	338.483	240 - 472	1.88588	1.01383	0.874034	0.9274	not	reliable
YOR324C	FRT1	180.348	170 - 190	242.469	221 - 264	1.34414	1.15234	0.0339314	0.0710274	not	335.225	277 - 407	1.86118	1.13163	0.0746898	0.129983	not	320.556	261 - 384	1.77742	0.955523	0.485493	0.633093	not	reliable
YOR113W	AZF1	180.838	180 - 180	203.721	203 - 204	1.13078	0.969429	0.51801	0.600628	not	335.607	283 - 395	1.8571	1.12915	0.118187	0.185892	not	310.594	261 - 368	1.7213	0.925355	0.24593	0.40438	not	not
YOR080W	DIA2	180.993	136 - 248	381.085	187 - 773	2.05804	1.76438	0.0154985	0.0406492	induced	427.068	398 - 457	2.36013	1.435	0.00366191	0.0161432	not	323.072	216 - 473	1.76899	0.950993	0.665034	0.780219	not	reliable
YPL140C	MKK2	181.105	150 - 219	193.165	138 - 268	1.05315	0.902881	0.33254	0.421242	not	229.796	222 - 240	1.26824	0.77111	0.00494857	0.019383	not	325.384	259 - 411	1.79064	0.962633	0.623262	0.744807	not	reliable
YHR120W	MSH1	181.105	151 - 216	282.366	272 - 292	1.55768	1.33542	0.00233512	0.0134503	not	363.059	289 - 452	1.99459	1.21275	0.0525641	0.0986405	not	315.556	296 - 338	1.74235	0.93667	0.28637	0.444486	not	reliable
YHR151C	MTC6	181.273	178 - 183	241.467	233 - 250	1.33774	1.14686	0.025721	0.058261	not	351.903	NA	1.94999	1.18563	0.0136136	0.0373326	not	402.642	NA	2.22118	1.19408	0.0570141	0.162209	not	reliable
YLL038C	ENT4	181.62	NA	155.1	144 - 166	0.879685	0.754164	0.0496276	0.0944115	not	236.924	NA	1.34261	0.816331	0.142087	0.215281	not	378.45	NA	2.14344	1.15229	0.274324	0.432651	not	reliable
YGR239C	PEX21	181.906	143 - 235	202.853	195 - 210	1.11485	0.955773	0.49558	0.579372	not	288.351	201 - 400	1.57773	0.959289	0.66339	0.734129	not	223.016	NA	1.22489	0.658487	0.00100424	0.031964	repressed	reliable
YJL013C	MAD3	182.108	179 - 184	214.062	199 - 230	1.17967	1.01135	0.809557	0.852196	not	291.994	240 - 347	1.60321	0.974777	0.711906	0.77374	not	354.973	265 - 474	1.94469	1.04544	0.593905	0.720865	not	reliable
YER061C	CEM1	182.242	155 - 213	213.981	153 - 283	1.17312	1.00573	0.953915	0.966273	not	330.135	236 - 442	1.81239	1.10196	0.368661	0.462749	not	356.233	286 - 441	1.96926	1.05865	0.475034	0.624188	not	reliable
YIL132C	CSM2	182.242	153 - 211	125.876	103 - 149	0.69769	0.598137	0.000344396	0.00693745	repressed	180.546	171 - 191	1.00069	0.608436	0.00029317	0.0060363	repressed	332.777	252 - 431	1.83577	0.986891	0.88016	0.929113	not	reliable
YBL005W	PDR3	182.374	149 - 226	246.545	208 - 292	1.35175	1.15887	0.0613917	0.110724	not	301.764	254 - 357	1.64926	1.00278	0.97063	0.977022	not	280.383	254 - 312	1.53612	0.825802	0.0227763	0.0985948	not	reliable
YJL147C	YJL147C	182.486	170 - 195	213.613	182 - 256	1.16718	1.00064	0.992117	0.994755	not	263.673	260 - 268	1.44716	0.879898	0.0407878	0.0812309	not	353.214	349 - 358	1.93946	1.04264	0.399168	0.554035	not	reliable
YLR098C	CHA4	182.808	148 - 224	298.046	243 - 363	1.62095	1.38966	0.00515096	0.0202741	not	479.243	405 - 561	2.61404	1.58938	0.000773187	0.00779527	induced	553.639	481 - 643	3.02473	1.62606	0.000345469	0.0217108	induced	reliable
YGL053W	PRM8	182.842	157 - 214	202.252	164 - 248	1.10606	0.948235	0.434471	0.521735	not	250.07	185 - 338	1.35498	0.82385	0.0893489	0.149207	not	337.685	231 - 494	1.83143	0.984556	0.874004	0.9274	not	reliable
YDR532C	KRE28	182.932	174 - 190	165.075	141 - 190	0.899772	0.771384	0.00760986	0.0255894	not	257.533	248 - 268	1.41019	0.857417	0.0236251	0.054407	not	324.212	324 - 324	1.77681	0.955196	0.349032	0.508404	not	reliable
YMR111C	YMR111C	183.01	176 - 190	213.495	210 - 218	1.17233	1.00505	0.918333	0.937393	not	283.181	242 - 328	1.55487	0.945387	0.358231	0.451661	not	385.861	335 - 448	2.11732	1.13825	0.0625727	0.17122	not	reliable
YMR163C	INP2	183.156	146 - 220	182.421	180 - 184	1.00863	0.864709	0.0921022	0.151302	not	277.24	274 - 282	1.53403	0.932715	0.377896	0.471307	not	298.235	NA	1.64232	0.882893	0.229829	0.388236	not	reliable
YOL164W	BDS1	183.321	168 - 201	190.192	138 - 254	1.03635	0.888477	0.171196	0.247197	not	257.734	251 - 263	1.40783	0.855984	0.0192591	0.0470537	not	294.557	250 - 341	1.60577	0.863244	0.0516554	0.15464	not	reliable
YLR128W	DCN1	183.767	171 - 196	194.923	180 - 211	1.06024	0.908957	0.110532	0.174017	not	283.163	278 - 290	1.54369	0.938592	0.227338	0.314383	not	373.571	367 - 380	2.03664	1.09488	0.0984042	0.225791	not	reliable
YDR123C	INO2	183.946	158 - 208	192.33	168 - 221	1.05118	0.901186	0.183444	0.261284	not	296.379	274 - 323	1.62632	0.988829	0.858898	0.888934	not	357.608	NA	1.95069	1.04867	0.610315	0.735081	not	reliable
YAL047C	SPC72	184.423	136 - 246	220.366	182 - 265	1.19469	1.02422	0.776793	0.826942	not	317.624	290 - 344	1.71985	1.04569	0.595163	0.672979	not	357.518	343 - 370	1.93899	1.04238	0.591416	0.718593	not	reliable
YNL295W	YNL295W	184.467	142 - 235	237.3	146 - 369	1.26162	1.0816	0.542131	0.623104	not	359.817	NA	1.95021	1.18576	0.0492774	0.0940962	not	357.534	NA	1.93806	1.04188	0.552789	0.68837	not	reliable
YMR230W-A	YMR230W-A	184.579	164 - 211	235.445	212 - 263	1.27674	1.09457	0.126207	0.193203	not	219.96	199 - 247	1.19269	0.725177	0.00104653	0.00871749	not	293.374	277 - 312	1.59071	0.855149	0.0212423	0.0952031	not	reliable
YJR033C	RAV1	184.759	169 - 201	261.55	253 - 272	1.42359	1.22046	0.0105066	0.0313108	not	388.958	372 - 406	2.11827	1.28794	0.00463867	0.0186337	not	346.426	343 - 350	1.88791	1.01492	0.786288	0.86908	not	reliable
YER128W	YER128W	184.77	166 - 203	181.537	170 - 194	0.987644	0.846718	0.02968	0.0645137	not	241.123	218 - 269	1.31465	0.799328	0.00829817	0.0266825	not	310.669	269 - 354	1.6922	0.909709	0.16972	0.319128	not	reliable
YPL040C	ISM1	185.583	178 - 192	197.917	195 - 200	1.07115	0.918313	0.127081	0.19421	not	320.67	310 - 332	1.73692	1.05608	0.313584	0.406516	not	310.568	234 - 411	1.67299	0.899383	0.227589	0.385286	not	reliable
YLR381W	CTF3	185.594	175 - 194	245.388	208 - 283	1.3233	1.13448	0.10183	0.163623	not	339.607	321 - 359	1.84045	1.11903	0.0708602	0.124506	not	435.287	393 - 478	2.35769	1.26747	0.00500812	0.0544053	not	reliable
YLR466C-B	YLR466C-B	186.31	149 - 230	255.846	238 - 274	1.37326	1.17731	0.0318421	0.0674275	not	370.167	276 - 512	1.97893	1.20322	0.0732862	0.128013	not	352.95	306 - 409	1.8921	1.01718	0.803894	0.880431	not	reliable
YPL155C	KIP2	186.33	170 - 203	233.668	198 - 275	1.25587	1.07667	0.210453	0.291388	not	357.289	352 - 362	1.91978	1.16726	0.021094	0.0501715	not	326.65	297 - 362	1.75447	0.943188	0.300358	0.460013	not	reliable
YBR114W	RAD16	186.451	175 - 196	230.008	220 - 239	1.23907	1.06227	0.273623	0.358161	not	331.243	310 - 352	1.78679	1.0864	0.155835	0.232071	not	324.191	NA	1.74804	0.939727	0.275317	0.433081	not	reliable
YLL052C	AQY2	186.762	171 - 201	189.468	178 - 200	1.01605	0.871068	0.0239439	0.0552537	not	169.387	147 - 192	0.905691	0.550675	0.000119868	0.0060363	repressed	178.64	148 - 220	0.956599	0.514258	3.85523e-05	0.008215	repressed	not
YMR155W	YMR155W	186.852	181 - 191	198.15	192 - 205	1.06392	0.91211	0.103543	0.165669	not	267.054	225 - 313	1.43494	0.872469	0.0491904	0.0940253	not	296.433	282 - 312	1.59319	0.856481	0.0205659	0.0939994	not	reliable
YPL153C	RAD53	187.051	147 - 239	241.784	234 - 251	1.29216	1.10778	0.153286	0.226013	not	358.178	298 - 432	1.91292	1.16309	0.0833672	0.141387	not	301.992	298 - 308	1.61432	0.867844	0.0679999	0.179969	not	reliable
YPL156C	PRM4	187.186	170 - 205	174.449	151 - 206	0.928479	0.795995	0.0134046	0.0367329	not	304.71	294 - 317	1.63031	0.991257	0.859415	0.889126	not	368.662	330 - 415	1.97086	1.05951	0.31937	0.477494	not	reliable
YFL010W-A	AUA1	187.208	175 - 197	193.563	181 - 206	1.03606	0.888223	0.0406003	0.0809146	not	228.025	155 - 325	1.21356	0.737867	0.0130456	0.0363763	not	456.182	398 - 523	2.43898	1.31117	0.00270731	0.0441283	not	reliable
YPL045W	VPS16	187.298	179 - 195	251.926	233 - 269	1.34917	1.15666	0.0335977	0.0704593	not	371.192	364 - 380	1.9919	1.21111	0.00934841	0.0289883	not	420.494	370 - 484	2.25409	1.21178	0.0159525	0.0843379	not	reliable
YJL139C	YUR1	187.654	181 - 194	212.653	207 - 217	1.13503	0.973071	0.563759	0.643515	not	330.823	287 - 385	1.76213	1.07141	0.309198	0.40245	not	321.129	312 - 329	1.71572	0.922355	0.125375	0.263418	not	reliable
YOR334W	MRS2	187.799	166 - 210	226.289	220 - 233	1.21494	1.04158	0.493613	0.577669	not	342.384	328 - 358	1.839	1.11814	0.104814	0.168656	not	342.125	NA	1.83669	0.987386	0.840047	0.904321	not	reliable
YHR131C	YHR131C	188.032	168 - 210	282.366	271 - 292	1.50183	1.28754	0.00229292	0.0133206	not	380.728	346 - 420	2.02732	1.23264	0.00683299	0.0236665	not	362.421	312 - 416	1.92766	1.03629	0.540228	0.677651	not	reliable
YNR059W	MNT4	188.054	174 - 202	237.046	202 - 280	1.26264	1.08248	0.181768	0.259419	not	333.854	268 - 412	1.77597	1.07982	0.254915	0.344763	not	408.252	256 - 615	2.1472	1.15431	0.230294	0.388587	not	reliable
YMR052W	FAR3	188.121	187 - 187	152.814	127 - 182	0.815373	0.699028	0.00061471	0.00806682	not	238.093	207 - 276	1.26636	0.76997	0.0072886	0.0246263	not	306.901	264 - 359	1.63529	0.879116	0.0614379	0.169261	not	reliable
YLR032W	RAD5	188.144	181 - 194	224.137	223 - 224	1.19601	1.02535	0.607188	0.682483	not	372.264	318 - 437	1.98669	1.20794	0.0160963	0.0415901	not	518.05	372 - 708	2.74848	1.47756	0.00400016	0.0512948	not	reliable
YML023C	NSE5	188.256	160 - 217	248.148	225 - 268	1.32829	1.13876	0.0993322	0.160429	not	375.641	368 - 386	2.01478	1.22502	0.0208546	0.0497274	not	382.218	365 - 403	2.05074	1.10246	0.171832	0.321283	not	reliable
YGR197C	SNG1	189.302	168 - 214	239.399	233 - 247	1.26536	1.08481	0.137788	0.207268	not	250.054	200 - 312	1.31474	0.799384	0.0284773	0.0624777	not	266.795	226 - 319	1.40682	0.756294	0.00582337	0.0571803	not	reliable
YKR050W	TRK2	189.747	171 - 212	325.283	324 - 326	1.71555	1.47076	0.000236175	0.00649804	not	396.974	295 - 520	2.08776	1.26939	0.0194954	0.0473875	not	329.854	227 - 463	1.72652	0.928157	0.442392	0.59434	not	reliable
YML017W	PSP2	189.783	177 - 203	283.757	222 - 359	1.49645	1.28293	0.00955879	0.0294873	not	298.137	234 - 380	1.57068	0.955001	0.510669	0.595904	not	339.607	302 - 380	1.79201	0.963366	0.482286	0.630275	not	reliable
YDR057W	YOS9	189.814	184 - 193	237.148	219 - 254	1.2503	1.0719	0.215197	0.296433	not	346.533	345 - 347	1.83077	1.11314	0.0651344	0.116325	not	408.166	343 - 483	2.15273	1.15729	0.0504107	0.152404	not	reliable
YGL124C	MON1	189.825	188 - 190	195.256	195 - 195	1.03129	0.884135	0.0349174	0.0726077	not	277.776	256 - 300	1.46831	0.892756	0.0572869	0.105211	not	405.667	378 - 439	2.14364	1.1524	0.0275309	0.107737	not	reliable
YDL177C	YDL177C	189.904	173 - 203	187.326	163 - 215	0.989069	0.84794	0.0397139	0.0796403	not	335.593	308 - 364	1.77879	1.08153	0.191422	0.274862	not	411.844	NA	2.18164	1.17283	0.0300372	0.112844	not	reliable
YHR004C	NEM1	190.181	171 - 211	185.982	167 - 206	0.979302	0.839566	0.0126908	0.0353662	not	275.769	252 - 303	1.452	0.88284	0.0481782	0.0925283	not	394.517	368 - 427	2.07665	1.11639	0.0675011	0.179477	not	reliable
YOR035C	SHE4	190.627	176 - 205	279.34	231 - 338	1.45933	1.2511	0.0165107	0.0423512	not	361.676	245 - 512	1.88968	1.14896	0.15683	0.233306	not	400.646	329 - 490	2.10004	1.12896	0.100944	0.229381	not	reliable
YGR042W	YGR042W	190.683	189 - 190	163.507	159 - 166	0.858829	0.736283	0.000954616	0.00966535	not	310.199	229 - 420	1.62628	0.988805	0.884414	0.909169	not	342.706	327 - 363	1.80314	0.969349	0.524314	0.664726	not	reliable
YPL255W	BBP1	191.05	176 - 208	181.47	181 - 182	0.950563	0.814928	0.00500307	0.019984	not	287.463	266 - 310	1.50711	0.91635	0.122962	0.191748	not	284.775	NA	1.48878	0.800355	0.0154659	0.0835647	not	reliable
YER053C	PIC2	191.652	170 - 212	260.43	205 - 333	1.36838	1.17313	0.067844	0.119545	not	446.252	339 - 573	2.32941	1.41632	0.00891772	0.0281623	not	362.437	330 - 398	1.90568	1.02448	0.687833	0.798111	not	reliable
YIL169C	YIL169C	191.947	184 - 198	249.098	122 - 489	1.27499	1.09306	0.58363	0.661526	not	295.131	255 - 345	1.54432	0.938974	0.301195	0.394545	not	506.527	420 - 607	2.64609	1.42251	0.00163736	0.0360325	not	not
YDR488C	PAC11	192.075	173 - 210	147.97	137 - 157	0.774302	0.663817	0.000674126	0.00849188	repressed	235.268	192 - 280	1.23373	0.75013	0.00402589	0.0170117	not	299.498	262 - 343	1.56898	0.84347	0.0374568	0.12794	not	reliable
YER060W	FCY21	192.219	159 - 238	183.703	115 - 287	0.948223	0.812922	0.11184	0.175664	not	222.301	194 - 259	1.15333	0.701244	0.00315154	0.0148598	not	301.939	232 - 391	1.56361	0.840579	0.0799299	0.198456	not	reliable
YMR001C-A	YMR001C-A	192.577	158 - 230	186.301	140 - 245	0.968075	0.829941	0.109549	0.173027	not	263.974	NA	1.38613	0.842788	0.0493617	0.0942253	not	311.226	NA	1.63376	0.878291	0.115939	0.249431	not	reliable
YOL044W	PEX15	192.644	147 - 245	206.573	199 - 213	1.08875	0.933398	0.417964	0.506211	not	321.14	257 - 396	1.69198	1.02875	0.75952	0.812222	not	371.103	365 - 377	1.95809	1.05265	0.537606	0.674961	not	reliable
YOL100W	PKH2	192.678	141 - 258	245.564	185 - 316	1.28749	1.10378	0.389645	0.478158	not	375.256	368 - 385	1.98378	1.20617	0.0783348	0.134915	not	338.392	328 - 351	1.78973	0.962141	0.666729	0.781721	not	reliable
YER069W	ARG5,6	192.846	116 - 303	236.412	196 - 277	1.26908	1.088	0.532003	0.613958	not	465.214	332 - 646	2.4846	1.51068	0.0288929	0.0629987	not	262.44	184 - 371	1.39536	0.750131	0.102105	0.231188	not	reliable
YFR015C	GSY1	193.065	153 - 241	210.499	153 - 289	1.08733	0.932184	0.447414	0.533901	not	469.275	443 - 496	2.4307	1.4779	0.00098584	0.00847402	not	361.701	216 - 602	1.8427	0.990617	0.941784	0.966038	not	not
YKR023W	YKR023W	193.11	161 - 230	214.263	191 - 236	1.10669	0.94878	0.418905	0.507025	not	316.922	316 - 317	1.64106	0.997795	0.969918	0.976653	not	372.254	286 - 483	1.91965	1.03198	0.698481	0.804933	not	reliable
YLR227C	ADY4	193.311	183 - 201	230.342	224 - 237	1.19753	1.02665	0.59642	0.672518	not	334.52	307 - 361	1.73722	1.05626	0.370543	0.464287	not	631.451	627 - 638	3.28391	1.7654	3.69428e-05	0.008215	induced	reliable
YDR078C	SHU2	193.311	184 - 200	195.349	168 - 226	1.01199	0.867593	0.058036	0.106299	not	281.39	241 - 327	1.46281	0.889412	0.0810668	0.138524	not	295.842	279 - 314	1.5385	0.82708	0.00933899	0.0682446	not	reliable
YPR185W	ATG13	193.6	174 - 216	242.584	229 - 257	1.25427	1.0753	0.173862	0.250283	not	386.968	368 - 408	2.00111	1.21671	0.00827249	0.0266302	not	330.962	293 - 379	1.70948	0.918999	0.17861	0.329276	not	reliable
YDR143C	SAN1	194.068	182 - 208	211.159	168 - 268	1.08906	0.933664	0.320909	0.409536	not	334.72	273 - 408	1.71957	1.04553	0.557758	0.638599	not	382.275	304 - 488	1.96592	1.05686	0.465025	0.615824	not	reliable
YKL133C	YKL133C	194.09	187 - 203	188.725	166 - 211	0.974896	0.835789	0.0108002	0.0318986	not	254.087	224 - 283	1.31006	0.796541	0.00748895	0.0250044	not	344.476	248 - 492	1.76545	0.94909	0.569068	0.702301	not	reliable
YKL171W	NNK1	194.292	160 - 227	270.105	225 - 319	1.40617	1.20552	0.0412403	0.0820166	not	338.703	309 - 369	1.76095	1.07069	0.377776	0.471262	not	327.847	255 - 421	1.69985	0.913821	0.328746	0.48675	not	reliable
YPR164W	MMS1	194.314	157 - 238	294.34	255 - 343	1.53436	1.31542	0.011722	0.0336376	not	343.889	342 - 346	1.79237	1.08979	0.271933	0.363176	not	273.633	258 - 294	1.4265	0.766872	0.00983096	0.069682	not	reliable
YDR387C	YDR387C	194.334	154 - 245	242.626	228 - 259	1.24836	1.07023	0.326681	0.415341	not	345.092	276 - 426	1.76639	1.074	0.43646	0.52647	not	374.173	362 - 386	1.92532	1.03503	0.6077	0.732868	not	reliable
YIL159W	BNR1	195.026	185 - 202	223.938	188 - 269	1.14827	0.98442	0.817614	0.857805	not	321.169	230 - 440	1.64106	0.997792	0.980969	0.985149	not	356.329	309 - 410	1.83446	0.98619	0.816345	0.88725	not	reliable
YLR424W	SPP382	195.147	149 - 255	301.264	281 - 321	1.54111	1.32121	0.0106388	0.0316035	not	397.858	388 - 408	2.03889	1.23968	0.0270871	0.0602694	not	455.644	420 - 494	2.33418	1.25483	0.0231679	0.0991206	not	reliable
YJR098C	YJR098C	195.259	165 - 232	236.505	225 - 248	1.2114	1.03855	0.500462	0.583993	not	335.441	333 - 337	1.7179	1.04451	0.463828	0.552646	not	334.085	329 - 341	1.71153	0.9201	0.173488	0.323204	not	reliable
YOL017W	ESC8	195.528	172 - 219	260.999	258 - 264	1.34519	1.15325	0.0478225	0.0916896	not	373.851	358 - 388	1.92735	1.17186	0.0405659	0.0809092	not	333.446	309 - 360	1.71961	0.924443	0.228598	0.386648	not	reliable
YBR258C	SHG1	195.562	165 - 227	219.984	198 - 244	1.13368	0.971919	0.685679	0.749266	not	374.538	337 - 416	1.93511	1.17658	0.0489358	0.0936653	not	533.384	484 - 584	2.75468	1.48089	0.00116058	0.0323362	not	reliable
YDR080W	VPS41	195.817	188 - 203	242.795	192 - 299	1.2351	1.05887	0.44019	0.527147	not	305.512	268 - 344	1.56098	0.949104	0.406702	0.498549	not	402.559	399 - 408	2.06177	1.10839	0.0642671	0.174338	not	reliable
YOR349W	CIN1	195.895	184 - 205	248.821	201 - 305	1.27653	1.09438	0.201626	0.281371	not	345.564	303 - 394	1.77366	1.07841	0.215438	0.301912	not	273.649	237 - 315	1.40367	0.754599	0.00272664	0.044267	not	reliable
YHL009W-B	YHL009W-B	195.94	176 - 214	265.853	265 - 266	1.36662	1.17162	0.0272341	0.0606345	not	415.355	357 - 476	2.13084	1.29559	0.0093285	0.0289602	not	342.776	278 - 421	1.75774	0.944942	0.46169	0.612794	not	not
YHR036W	BRL1	195.94	175 - 217	215.397	215 - 215	1.10697	0.949021	0.368831	0.457279	not	307.788	305 - 310	1.58272	0.962323	0.517344	0.601458	not	347.652	NA	1.78812	0.961274	0.493647	0.638333	not	reliable
YMR055C	BUB2	196.074	147 - 252	217.382	216 - 218	1.12535	0.964775	0.65851	0.725464	not	332.582	277 - 393	1.72183	1.0469	0.604263	0.680412	not	367.458	NA	1.89802	1.02035	0.831541	0.898585	not	reliable
YDR338C	YDR338C	196.329	183 - 206	251.641	236 - 268	1.28913	1.10519	0.088734	0.147265	not	286.007	257 - 317	1.46531	0.890932	0.0741076	0.129188	not	343.325	330 - 360	1.75895	0.945597	0.308089	0.467548	not	reliable
YOR228C	YOR228C	196.472	152 - 246	203.737	188 - 221	1.03696	0.888995	0.123664	0.190015	not	287.881	255 - 327	1.46495	0.890714	0.142197	0.21539	not	363.679	342 - 387	1.85073	0.994936	0.940291	0.965317	not	reliable
YNL106C	INP52	196.54	165 - 234	241.617	240 - 243	1.22883	1.05349	0.369476	0.457878	not	327.495	316 - 339	1.66666	1.01336	0.818758	0.858687	not	389.651	336 - 458	1.98002	1.06444	0.368962	0.524993	not	reliable
YLR360W	VPS38	196.674	189 - 205	220.135	191 - 253	1.11826	0.958694	0.483124	0.56653	not	337.399	332 - 344	1.72018	1.0459	0.373131	0.466702	not	452.558	417 - 489	2.30671	1.24006	0.00506887	0.0545048	not	reliable
YER028C	MIG3	196.741	188 - 203	234.728	212 - 259	1.19932	1.02819	0.591548	0.668892	not	279.514	204 - 368	1.41603	0.860967	0.14194	0.215116	not	225.548	170 - 301	1.14782	0.617055	0.000704865	0.0277848	repressed	reliable
YGR238C	KEL2	196.831	169 - 224	291.305	263 - 321	1.49401	1.28083	0.00756303	0.0254774	not	396.015	308 - 514	2.01725	1.22653	0.06197	0.111982	not	295.772	228 - 385	1.51019	0.811862	0.0435365	0.139861	not	reliable
YLR145W	RMP1	196.831	170 - 224	190.278	177 - 202	0.973846	0.834889	0.0294602	0.0641613	not	301.264	295 - 306	1.54447	0.939067	0.343281	0.43716	not	475.985	NA	2.44098	1.31225	0.00434021	0.0514808	not	reliable
YER104W	RTT105	196.865	162 - 235	167.284	167 - 167	0.858296	0.735827	0.00408014	0.0176409	not	202.393	158 - 265	1.03136	0.627085	0.00350578	0.0156873	repressed	316.774	279 - 363	1.62552	0.873863	0.104771	0.234686	not	reliable
YPL148C	PPT2	196.943	151 - 261	214.194	156 - 291	1.10281	0.945448	0.592982	0.670112	not	298.889	267 - 337	1.54258	0.937913	0.464032	0.552656	not	324.34	178 - 532	1.64555	0.884629	0.406649	0.560567	not	reliable
YDR082W	STN1	196.965	143 - 259	250.441	243 - 258	1.29416	1.1095	0.260135	0.345114	not	320.734	244 - 416	1.64641	1.00105	0.992527	0.993933	not	374.829	339 - 416	1.93649	1.04104	0.657954	0.774643	not	reliable
YPL202C	AFT2	197.209	178 - 215	197.484	164 - 235	1.00265	0.859584	0.0752082	0.129175	not	286.91	272 - 305	1.4649	0.890685	0.0763884	0.132167	not	364.26	307 - 438	1.856	0.997768	0.973211	0.982242	not	reliable
YDR480W	DIG2	197.61	187 - 206	223.471	194 - 255	1.13286	0.971217	0.643217	0.71292	not	321.474	256 - 403	1.63251	0.992596	0.916034	0.933866	not	400.715	392 - 408	2.0392	1.09626	0.113194	0.246524	not	reliable
YNL126W	SPC98	198.21	160 - 243	276.545	247 - 309	1.39119	1.19268	0.0411922	0.0819786	not	363.767	251 - 517	1.8249	1.10957	0.310706	0.404175	not	419.199	397 - 440	2.1146	1.13679	0.0842528	0.205226	not	reliable
YJL112W	MDV1	198.367	186 - 210	293.373	268 - 324	1.48223	1.27073	0.00297689	0.0152099	not	487.861	474 - 502	2.46382	1.49804	0.000220976	0.0060363	not	304.401	230 - 403	1.52969	0.822347	0.0438914	0.140469	not	reliable
YOL023W	IFM1	198.412	194 - 202	278.78	256 - 301	1.40723	1.20643	0.00982025	0.0300885	not	426.463	357 - 500	2.14879	1.3065	0.0077068	0.0254761	not	346.426	344 - 349	1.75211	0.941915	0.240657	0.399572	not	reliable
YKR078W	YKR078W	198.49	182 - 214	188.76	169 - 211	0.95419	0.818037	0.0161529	0.0416982	not	257.786	211 - 322	1.30548	0.793756	0.0129077	0.0361859	not	338.989	304 - 382	1.71781	0.92348	0.202931	0.357847	not	reliable
YLL058W	YLL058W	198.86	115 - 305	241.95	227 - 258	1.25855	1.07897	0.5567	0.637001	not	299.726	245 - 370	1.5574	0.946926	0.683169	0.750876	not	309.331	230 - 414	1.5995	0.859874	0.314139	0.472763	not	reliable
YJL023C	PET130	199.457	150 - 256	233.96	188 - 291	1.17224	1.00497	0.950891	0.964188	not	345.126	284 - 410	1.72351	1.04792	0.594469	0.672463	not	418.653	356 - 488	2.09534	1.12643	0.171581	0.321133	not	reliable
YOL101C	IZH4	199.858	148 - 265	277.614	214 - 358	1.37728	1.18076	0.135269	0.204294	not	341.681	327 - 359	1.70847	1.03878	0.63216	0.70648	not	536.39	489 - 584	2.68275	1.44222	0.00311747	0.0467704	not	reliable
YIL139C	REV7	199.992	175 - 231	251.195	154 - 384	1.23129	1.0556	0.66064	0.726961	not	326.591	290 - 365	1.63027	0.991234	0.892922	0.91625	not	302.11	187 - 457	1.49061	0.801335	0.0999804	0.22802	not	reliable
YDR482C	CWC21	200.216	180 - 218	200.036	173 - 230	1.00212	0.859128	0.0550664	0.102318	not	341.816	306 - 377	1.719	1.04518	0.453036	0.542433	not	400.705	392 - 410	2.01531	1.08341	0.176512	0.326471	not	reliable
YLR211C	YLR211C	200.995	199 - 201	173.63	146 - 200	0.867126	0.743397	0.00130923	0.0105485	not	237.124	232 - 242	1.18415	0.719983	0.000582371	0.00730352	not	468.52	408 - 536	2.33722	1.25647	0.0059209	0.0576396	not	reliable
YGR168C	YGR168C	201.04	191 - 209	232.109	207 - 261	1.16087	0.995227	0.927664	0.945552	not	343.32	304 - 389	1.71311	1.0416	0.528022	0.610485	not	466.106	459 - 473	2.33116	1.25321	0.00407821	0.0512948	not	reliable
YOR058C	ASE1	201.085	182 - 219	297.528	275 - 322	1.48755	1.2753	0.00613746	0.0225999	not	495.388	460 - 535	2.47909	1.50733	0.000597473	0.00736233	induced	448.827	447 - 452	2.24864	1.20885	0.0129841	0.0779718	not	reliable
YER101C	AST2	201.085	181 - 221	196.265	182 - 209	0.983217	0.842922	0.0201287	0.0485907	not	265.531	242 - 292	1.33028	0.808833	0.00990129	0.0299154	not	342.744	314 - 373	1.71615	0.922584	0.211669	0.368824	not	reliable
YGR237C	YGR237C	201.83	195 - 206	311.022	278 - 345	1.54117	1.32126	0.00239444	0.0135057	not	517.909	428 - 617	2.57098	1.5632	0.000360362	0.00624932	induced	413.651	396 - 429	2.05562	1.10508	0.0734333	0.188876	not	reliable
YER109C	FLO8	202.688	196 - 208	343.755	343 - 344	1.70023	1.45763	0.000208015	0.00626999	not	483.63	428 - 548	2.39272	1.45482	0.000433917	0.00663013	not	417.363	417 - 418	2.06546	1.11037	0.0611068	0.168791	not	reliable
YMR268C	PRP24	202.71	202 - 202	187.326	164 - 213	0.923999	0.792155	0.00773722	0.025956	not	284.034	244 - 332	1.40564	0.854655	0.0289561	0.0630876	not	342.701	NA	1.69651	0.912028	0.102068	0.231188	not	reliable
YNL086W	SNN1	202.733	198 - 207	202.546	183 - 225	1.0008	0.857993	0.0312825	0.0666418	not	290.306	274 - 307	1.43715	0.873811	0.0432162	0.084938	not	321.115	311 - 334	1.59095	0.855281	0.0177675	0.0874527	not	reliable
YCL010C	SGF29	202.912	161 - 249	180.744	153 - 212	0.902693	0.773888	0.0150858	0.0399464	not	251.128	199 - 312	1.25221	0.761368	0.0176298	0.0441603	not	333.355	NA	1.64574	0.884734	0.325907	0.484097	not	reliable
YOL154W	ZPS1	203.422	177 - 230	334.941	305 - 368	1.64329	1.40881	0.00124826	0.0104242	not	373.233	358 - 389	1.83564	1.1161	0.0860864	0.145042	not	301.966	262 - 347	1.48289	0.797188	0.0107636	0.0722167	not	reliable
YBR233W	PBP2	203.98	200 - 206	156.192	132 - 188	0.768079	0.658482	0.000274023	0.00660363	repressed	250.592	226 - 280	1.23223	0.749216	0.00144137	0.00999068	not	391.431	358 - 426	1.92436	1.03452	0.504225	0.648453	not	reliable
YHR166C	CDC23	204.246	171 - 241	194.83	185 - 205	0.953881	0.817773	0.0122618	0.0347457	not	267.572	235 - 303	1.31	0.796501	0.0102434	0.0306381	not	304.471	297 - 313	1.49097	0.80153	0.00828574	0.065584	not	reliable
YGL117W	YGL117W	204.369	191 - 217	185.315	178 - 195	0.907126	0.777689	0.00238621	0.0135057	not	286.376	243 - 338	1.403	0.853045	0.0321563	0.0682974	not	442.679	419 - 467	2.17017	1.16666	0.0186982	0.0896246	not	reliable
YFL059W	SNZ3	204.425	203 - 204	227.505	199 - 256	1.11699	0.957609	0.417058	0.50533	not	319.865	264 - 384	1.56367	0.950735	0.490721	0.578299	not	302.014	284 - 321	1.48263	0.797046	0.00341377	0.0487913	not	reliable
YKR019C	IRS4	204.537	181 - 230	263.718	249 - 274	1.29974	1.11428	0.0986391	0.159681	not	343.254	337 - 351	1.69121	1.02828	0.649001	0.721736	not	378.488	364 - 394	1.86558	1.00292	0.960118	0.977478	not	reliable
YMR156C	TPP1	204.826	199 - 210	252.918	236 - 268	1.23559	1.05928	0.289225	0.37468	not	353.225	344 - 363	1.72931	1.05145	0.321292	0.414514	not	487.644	426 - 559	2.38489	1.28209	0.00375076	0.0506128	not	reliable
YJL003W	COX16	204.949	185 - 228	236.331	197 - 278	1.15576	0.990848	0.897642	0.920592	not	367.029	277 - 489	1.79858	1.09357	0.287226	0.379656	not	399.49	385 - 414	1.96344	1.05552	0.360114	0.518931	not	reliable
YMR105C	PGM2	205.328	196 - 215	235.871	222 - 250	1.15465	0.989896	0.836815	0.872768	not	432.335	376 - 488	2.11196	1.28411	0.00692027	0.023881	not	363.029	306 - 427	1.77408	0.953728	0.458224	0.609638	not	reliable
YDL056W	MBP1	206.031	145 - 278	323.86	225 - 448	1.58607	1.35976	0.0460267	0.0891156	not	461.983	382 - 539	2.28851	1.39146	0.0162381	0.0418622	not	424.862	318 - 562	2.09542	1.12648	0.322908	0.48151	not	reliable
YKR101W	SIR1	206.275	178 - 240	189.01	180 - 198	0.923234	0.791498	0.00947699	0.0293227	not	270.014	251 - 290	1.32114	0.803273	0.0118403	0.0339944	not	337.72	273 - 421	1.64632	0.885046	0.165443	0.314149	not	reliable
YIL017C	VID28	206.718	150 - 276	241.566	213 - 276	1.16877	1.002	0.979225	0.984272	not	293.702	286 - 302	1.42092	0.863943	0.093147	0.154317	not	293.294	NA	1.41017	0.758094	0.0308511	0.114299	not	reliable
YPR184W	GDB1	206.998	206 - 207	286.477	278 - 296	1.38855	1.19042	0.00871757	0.0279041	not	438.01	381 - 508	2.12231	1.2904	0.00406551	0.0170836	not	458.157	369 - 567	2.21497	1.19075	0.0381198	0.129152	not	reliable
YDL027C	YDL027C	207.099	186 - 230	183.472	170 - 198	0.892529	0.765175	0.00300354	0.015277	not	272.556	257 - 291	1.32462	0.805394	0.0117319	0.0338032	not	347.626	312 - 387	1.69008	0.908573	0.148925	0.294044	not	reliable
YDR031W	MIC14	207.544	181 - 238	240.636	160 - 389	1.14675	0.983122	0.888192	0.912887	not	416.311	379 - 456	2.02241	1.22966	0.0138601	0.0377068	not	560.683	356 - 857	2.68922	1.4457	0.0177812	0.0874527	not	reliable
YBR157C	ICS2	207.665	171 - 247	258.447	247 - 271	1.24273	1.06541	0.325538	0.414041	not	331.88	252 - 420	1.59424	0.969326	0.6976	0.761557	not	244.711	NA	1.16417	0.625848	0.00618584	0.0585639	not	reliable
YMR137C	PSO2	208.746	200 - 218	236.398	187 - 296	1.12966	0.968467	0.672123	0.737016	not	379.421	332 - 425	1.822	1.10781	0.138914	0.211722	not	378.389	259 - 545	1.80455	0.970107	0.754839	0.845797	not	reliable
YLL062C	MHT1	209.324	162 - 266	226.571	183 - 278	1.08159	0.927259	0.364546	0.452959	not	391.566	308 - 487	1.861	1.13152	0.206349	0.292069	not	669.714	639 - 703	3.1988	1.71964	0.000254208	0.0191316	induced	reliable
YKL062W	MSN4	209.548	204 - 213	158.144	153 - 163	0.75551	0.647707	0.000156837	0.00626999	repressed	278.025	195 - 384	1.31774	0.80121	0.053049	0.0994516	not	466.759	418 - 523	2.23211	1.19996	0.0133567	0.0784676	not	not
YJL025W	RRN7	209.884	147 - 284	291.907	289 - 296	1.41783	1.21552	0.0732266	0.126774	not	355.802	310 - 409	1.72907	1.05131	0.60591	0.681995	not	410.511	331 - 506	1.9898	1.0697	0.520765	0.661749	not	reliable
YCR106W	RDS1	209.893	187 - 230	246.598	193 - 320	1.16614	0.999747	0.997504	0.998339	not	234.804	90.5 - 590	1.06579	0.648016	0.0793667	0.136153	not	201.468	170 - 237	0.959459	0.515795	4.22007e-05	0.008215	repressed	reliable
YCL027W	FUS1	210.305	185 - 236	290.139	267 - 311	1.37774	1.18116	0.0227329	0.053197	not	335.123	303 - 373	1.59167	0.967762	0.603214	0.679773	not	346.432	334 - 356	1.64833	0.886128	0.0565997	0.162066	not	reliable
YDR313C	PIB1	210.327	190 - 230	282.366	271 - 293	1.34237	1.15082	0.0292778	0.0638624	not	415.157	374 - 455	1.9758	1.20132	0.0134275	0.0370052	not	398.234	386 - 411	1.89547	1.01899	0.707861	0.811114	not	reliable
YBR216C	YBP1	210.349	195 - 225	267.204	266 - 267	1.27154	1.09011	0.107097	0.169913	not	412.647	380 - 442	1.96469	1.19457	0.0120489	0.0344707	not	406.855	381 - 433	1.93654	1.04107	0.438356	0.590179	not	reliable
YNL274C	GOR1	210.994	155 - 277	235.329	225 - 247	1.11394	0.954996	0.559282	0.639438	not	372.293	287 - 497	1.75097	1.06462	0.561651	0.642276	not	427.828	399 - 465	2.02743	1.08993	0.292664	0.452022	not	reliable
YNL146C-A	YNL146C-A	211.341	198 - 224	218.258	182 - 259	1.03291	0.885529	0.114919	0.179554	not	309.073	201 - 454	1.448	0.880411	0.298213	0.391435	not	432.742	382 - 491	2.05623	1.10541	0.126719	0.264767	not	reliable
YDR085C	AFR1	211.386	188 - 236	217.791	188 - 249	1.03387	0.886348	0.107238	0.170041	not	444.879	293 - 672	2.09091	1.27131	0.071888	0.12596	not	631.363	538 - 735	3.00438	1.61512	0.000297114	0.0207466	induced	not
YOL108C	INO4	211.787	196 - 229	235.396	214 - 258	1.11525	0.956112	0.452723	0.539092	not	350.932	345 - 358	1.66636	1.01318	0.811011	0.852934	not	414.277	414 - 415	1.96798	1.05797	0.302619	0.462223	not	reliable
YOR036W	PEP12	211.818	154 - 296	225.12	199 - 257	1.06338	0.911651	0.30171	0.388188	not	349.294	329 - 369	1.64997	1.00321	0.96934	0.976419	not	461.712	382 - 559	2.17543	1.16949	0.131456	0.270664	not	reliable
YDL127W	PCL2	212.423	159 - 280	242.918	214 - 278	1.16344	0.997434	0.976289	0.982019	not	328	212 - 480	1.55647	0.946358	0.662805	0.733671	not	399.372	284 - 544	1.89931	1.02105	0.851762	0.912072	not	reliable
YPR093C	ASR1	212.734	180 - 253	207.867	187 - 231	0.984057	0.843643	0.0476897	0.091497	not	318.076	314 - 322	1.50975	0.917954	0.225115	0.312148	not	425.344	372 - 485	2.01777	1.08473	0.264408	0.422574	not	reliable
YCL032W	STE50	213.023	205 - 220	212.644	189 - 240	1.00237	0.859346	0.0238166	0.0550497	not	311.119	259 - 377	1.465	0.890747	0.0975575	0.160216	not	374.773	339 - 411	1.76581	0.949281	0.332832	0.491218	not	reliable
YDR484W	VPS52	213.6	166 - 277	216.581	209 - 223	1.01262	0.868131	0.0873057	0.145321	not	291.194	NA	1.3618	0.827995	0.0515171	0.0972241	not	360.039	304 - 426	1.6826	0.904547	0.240426	0.399572	not	reliable
YMR224C	MRE11	213.712	186 - 249	265.737	238 - 296	1.23985	1.06294	0.352885	0.441184	not	366.839	263 - 503	1.7009	1.03418	0.733052	0.791098	not	420.521	341 - 529	1.96259	1.05507	0.476861	0.625655	not	reliable
YBR295W	PCA1	213.824	208 - 218	271.942	247 - 297	1.27177	1.0903	0.142496	0.213216	not	425.127	423 - 427	1.99288	1.2117	0.00716582	0.0244303	not	450.037	419 - 480	2.10931	1.13395	0.0391557	0.131122	not	reliable
YER007W	PAC2	213.925	197 - 232	218.233	194 - 246	1.02279	0.876853	0.0637708	0.113997	not	284.686	259 - 312	1.33833	0.813729	0.00856083	0.0272789	not	377.891	370 - 388	1.77654	0.955049	0.390158	0.54575	not	reliable
YHR067W	HTD2	214.071	173 - 259	245.37	227 - 268	1.16087	0.995225	0.946585	0.960682	not	338.268	320 - 358	1.59901	0.972222	0.709851	0.772099	not	351.303	289 - 429	1.65827	0.89147	0.197922	0.351253	not	reliable
YCR066W	RAD18	214.247	208 - 219	237.756	231 - 245	1.11101	0.95248	0.326706	0.415341	not	331.711	308 - 359	1.55192	0.943596	0.263556	0.354769	not	422.927	406 - 439	1.97857	1.06366	0.227022	0.384991	not	reliable
YDL059C	RAD59	214.404	189 - 241	176.115	136 - 226	0.826765	0.708795	0.00378149	0.0170695	not	246.962	217 - 285	1.16049	0.7056	0.00142266	0.00995225	not	416.142	401 - 433	1.95602	1.05154	0.396388	0.552074	not	reliable
YOR120W	GCY1	214.617	153 - 296	263.493	252 - 278	1.25126	1.07272	0.469769	0.554353	not	349.659	283 - 430	1.654	1.00566	0.959466	0.968196	not	416.723	384 - 450	1.98115	1.06505	0.512448	0.655599	not	reliable
YPR134W	MSS18	214.693	213 - 216	158.954	133 - 190	0.737548	0.632308	0.00074927	0.00892737	repressed	278.277	256 - 304	1.29801	0.789214	0.00493658	0.0193495	not	373.56	368 - 380	1.74481	0.937992	0.20638	0.362317	not	reliable
YDR277C	MTH1	215.472	194 - 237	114.92	75.3 - 170	0.523158	0.448509	0.000629837	0.00815475	repressed	260.544	213 - 314	1.20576	0.73312	0.00463076	0.0186152	not	361.233	NA	1.67822	0.902194	0.0793471	0.197356	not	not
YPR119W	CLB2	215.906	196 - 236	388.58	340 - 439	1.80166	1.54458	0.000275802	0.00660363	induced	535.989	466 - 614	2.47977	1.50774	0.000639513	0.00751993	induced	538.258	511 - 567	2.49545	1.34153	0.0011566	0.0323362	not	reliable
YKR083C	DAD2	215.963	211 - 220	234.545	234 - 236	1.08775	0.932536	0.167511	0.24281	not	323.279	NA	1.49996	0.912001	0.101764	0.165117	not	408.094	387 - 428	1.89372	1.01804	0.712559	0.814847	not	reliable
YDL093W	PMT5	216.229	174 - 264	385.436	342 - 432	1.78254	1.52819	0.000716299	0.00877853	induced	482.072	450 - 513	2.22735	1.35427	0.00373415	0.0163092	not	357.502	326 - 394	1.65274	0.888497	0.103247	0.233026	not	reliable
YNR039C	ZRG17	216.408	NA	306.342	NA	1.41909	1.2166	0.00498809	0.0199382	not	473.023	NA	2.19178	1.33264	0.00116083	0.00905155	not	442.695	NA	2.04979	1.10195	0.107201	0.237962	not	reliable
YPR071W	YPR071W	216.565	188 - 249	235.015	165 - 334	1.07861	0.924703	0.475061	0.558849	not	297.617	277 - 322	1.3859	0.842649	0.0276183	0.0610449	not	352.529	288 - 429	1.63655	0.879794	0.129735	0.268686	not	reliable
YDR379C-A	YDR379C-A	216.887	207 - 226	230.617	226 - 235	1.06725	0.914967	0.098018	0.159211	not	378.048	291 - 488	1.73854	1.05706	0.514307	0.599255	not	359.892	246 - 511	1.65259	0.888413	0.233491	0.39246	not	reliable
YJL156C	SSY5	217.021	184 - 252	326.442	319 - 332	1.51842	1.30176	0.00512714	0.0202367	not	439.145	407 - 469	2.04127	1.24113	0.017035	0.0431481	not	393.294	378 - 410	1.82984	0.983704	0.79367	0.873996	not	reliable
YJL144W	YJL144W	217.03	NA	307.268	283 - 333	1.41577	1.21376	0.0309544	0.066142	not	391.836	NA	1.80548	1.09776	0.22305	0.309741	not	334.003	NA	1.52987	0.822445	0.0821624	0.202161	not	reliable
YPL070W	MUK1	217.142	186 - 252	300.563	294 - 309	1.38342	1.18602	0.0187198	0.0460241	not	487.326	467 - 508	2.24528	1.36517	0.00143033	0.00995225	not	479.74	403 - 563	2.20587	1.18585	0.0415067	0.136173	not	reliable
YAL054C	ACS1	217.145	165 - 279	203.545	181 - 230	0.953356	0.817322	0.0524229	0.0983429	not	341.895	215 - 502	1.57703	0.958862	0.754557	0.808137	not	439.54	405 - 485	2.05739	1.10603	0.267987	0.425768	not	reliable
YPL076W	GPI2	217.187	199 - 238	209.458	193 - 230	0.965427	0.827671	0.00930957	0.0290151	not	267.335	213 - 336	1.22592	0.745381	0.00835368	0.0267848	not	342.091	327 - 360	1.57662	0.847575	0.0156202	0.0840399	not	reliable
YGR003W	CUL3	217.321	208 - 226	359.693	352 - 367	1.66182	1.42469	0.000337311	0.0068627	not	436.518	381 - 496	2.01289	1.22387	0.0155808	0.0406985	not	359.364	342 - 378	1.66073	0.892794	0.0543337	0.158817	not	reliable
YKL161C	KDX1	217.456	186 - 257	197.218	144 - 277	0.904913	0.775791	0.0442806	0.0867814	not	537.443	411 - 699	2.48073	1.50832	0.00391542	0.0167389	induced	1017.54	908 - 1140	4.72273	2.53889	1.09961e-05	0.00789987	induced	not
YDL142C	CRD1	217.59	159 - 289	211.811	200 - 222	0.989444	0.848261	0.102964	0.165116	not	269.678	NA	1.2566	0.764034	0.0346566	0.0721183	not	401.888	337 - 476	1.87684	1.00897	0.924355	0.955263	not	reliable
YMR250W	GAD1	217.644	204 - 231	235.586	191 - 293	1.08356	0.928948	0.253302	0.337815	not	413.615	345 - 492	1.89673	1.15325	0.0738148	0.128817	not	404.337	318 - 509	1.85421	0.996805	0.96362	0.9785	not	reliable
YNR049C	MSO1	217.767	204 - 231	197.433	188 - 207	0.90976	0.779947	0.00284759	0.0149143	not	267.12	NA	1.23262	0.749454	0.00133535	0.00966579	not	418.575	386 - 448	1.93101	1.03809	0.48005	0.628365	not	reliable
YMR204C	INP1	217.876	166 - 285	184.707	165 - 208	0.844922	0.724361	0.00649749	0.0232447	not	300.663	241 - 375	1.37823	0.837989	0.0700094	0.123196	not	399.49	385 - 415	1.83344	0.985638	0.842411	0.905588	not	reliable
YBR105C	VID24	218.213	202 - 232	291.259	205 - 400	1.32649	1.13721	0.203936	0.284174	not	394.209	318 - 490	1.80783	1.09919	0.244284	0.333253	not	434.026	NA	2.00003	1.0752	0.18972	0.342939	not	reliable
YIL087C	AIM19	218.302	187 - 251	207.291	202 - 212	0.957569	0.820935	0.0170412	0.0431398	not	320.203	257 - 396	1.47861	0.899021	0.184332	0.266317	not	359.991	354 - 365	1.66459	0.894869	0.109027	0.24013	not	reliable
YOR054C	VHS3	218.658	199 - 239	269.714	264 - 276	1.24078	1.06373	0.255977	0.340741	not	340.813	280 - 410	1.56662	0.952533	0.459444	0.54881	not	384.659	371 - 399	1.76995	0.951507	0.362605	0.52026	not	reliable
YAL063C	FLO9	218.857	187 - 254	317.142	276 - 363	1.44961	1.24277	0.0101549	0.0306965	not	387.551	312 - 478	1.76326	1.07209	0.389325	0.482476	not	464.875	452 - 477	2.12502	1.14239	0.0457995	0.143912	not	reliable
YBR217W	ATG12	218.902	199 - 238	214.245	180 - 254	0.979451	0.839694	0.0239127	0.0552041	not	308.86	259 - 365	1.41119	0.858028	0.0419612	0.0831287	not	468.552	446 - 491	2.14244	1.15175	0.0292064	0.110718	not	reliable
YML029W	USA1	218.947	209 - 230	283.782	238 - 346	1.29794	1.11274	0.113691	0.178051	not	471.402	387 - 566	2.15417	1.30977	0.00491869	0.019333	not	526.546	511 - 543	2.4093	1.29522	0.00163071	0.0360325	not	reliable
YIL144W	TID3	218.947	208 - 230	261.068	178 - 379	1.17843	1.01028	0.917208	0.936742	not	400.802	393 - 409	1.83388	1.11503	0.0621873	0.112338	not	525.357	488 - 563	2.40311	1.29189	0.00229874	0.0412752	not	reliable
YJL087C	TRL1	219.048	206 - 231	310.77	283 - 343	1.42542	1.22203	0.00704131	0.0245121	not	475.281	436 - 518	2.17992	1.32543	0.00161713	0.0105739	not	426.663	376 - 483	1.95472	1.05084	0.407898	0.561468	not	reliable
YFL029C	CAK1	219.123	162 - 295	203.712	175 - 240	0.929838	0.79716	0.0323474	0.0682929	not	286.307	253 - 323	1.30424	0.793002	0.034111	0.0713242	not	396.358	356 - 437	1.80823	0.972088	0.729001	0.826298	not	reliable
YOR181W	LAS17	219.426	217 - 221	211.135	200 - 223	0.963597	0.826102	0.00800786	0.0264559	not	303.725	234 - 389	1.38522	0.842237	0.0440032	0.086029	not	393.304	391 - 397	1.79805	0.966615	0.479977	0.628365	not	reliable
YML128C	MSC1	219.748	197 - 245	271.59	255 - 291	1.23692	1.06042	0.275596	0.360076	not	421.579	380 - 471	1.91631	1.16515	0.045009	0.0875116	not	448.838	439 - 461	2.0442	1.09894	0.107096	0.237859	not	reliable
YIL014C-A	YIL014C-A	219.838	217 - 221	272.266	255 - 292	1.24172	1.06454	0.212973	0.294158	not	400.97	388 - 414	1.82873	1.1119	0.0643637	0.115239	not	410.591	396 - 430	1.87253	1.00665	0.889871	0.935233	not	reliable
YPR095C	SYT1	220.46	167 - 291	278.295	232 - 332	1.26195	1.08188	0.331078	0.419673	not	390.731	384 - 401	1.77226	1.07756	0.316339	0.409337	not	371.002	263 - 500	1.6712	0.898419	0.310968	0.469777	not	reliable
YLR133W	CKI1	220.485	183 - 266	274.366	225 - 334	1.25768	1.07823	0.344893	0.434264	not	432.538	416 - 454	1.98382	1.2062	0.0301435	0.0649988	not	566.593	487 - 664	2.59494	1.39501	0.00384787	0.051085	not	reliable
YGR015C	YGR015C	220.729	215 - 225	200.901	163 - 247	0.912843	0.782591	0.00691663	0.0242632	not	346.985	324 - 372	1.57763	0.959226	0.413978	0.505169	not	414.887	402 - 426	1.88625	1.01403	0.771013	0.856244	not	reliable
YHR172W	SPC97	221.006	192 - 252	300.295	261 - 343	1.35934	1.16538	0.0373205	0.0761488	not	448.097	404 - 494	2.02834	1.23326	0.00998202	0.0301082	not	358.157	342 - 374	1.62105	0.871462	0.0435127	0.139861	not	reliable
YJR019C	TES1	221.43	192 - 256	248.303	168 - 362	1.11707	0.957674	0.64516	0.714095	not	372.428	317 - 428	1.6779	1.02019	0.773391	0.82332	not	450.706	420 - 486	2.03556	1.0943	0.154778	0.301248	not	reliable
YMR042W	ARG80	221.497	207 - 238	200.01	186 - 214	0.902465	0.773693	0.00275368	0.0145832	not	253.267	239 - 267	1.14397	0.695555	0.000588339	0.00732318	not	450.684	444 - 459	2.03758	1.09538	0.102187	0.231281	not	reliable
YLR136C	TIS11	221.629	152 - 323	208.533	202 - 214	0.941738	0.807362	0.0512643	0.0964896	not	238.109	190 - 304	1.06834	0.649571	0.00848989	0.0270987	repressed	261.974	182 - 380	1.17395	0.631104	0.00815811	0.0652429	not	reliable
YJL146W	IDS2	222.153	168 - 294	259.264	247 - 270	1.16682	1.00033	0.996375	0.997609	not	384.373	337 - 438	1.7262	1.04956	0.568501	0.648928	not	490.836	NA	2.20643	1.18616	0.0733333	0.188876	not	reliable
YPL072W	UBP16	222.455	215 - 228	241.185	211 - 273	1.08404	0.929358	0.254822	0.339522	not	361.724	308 - 424	1.63122	0.991806	0.885917	0.910217	not	378.57	301 - 490	1.70195	0.914954	0.252124	0.410719	not	reliable
YNL082W	PMS1	222.511	205 - 239	324.209	257 - 397	1.45465	1.24708	0.0272951	0.0606999	not	443.462	420 - 469	2.00449	1.21876	0.0089785	0.0282411	not	400.124	360 - 447	1.80735	0.971612	0.61566	0.739628	not	reliable
YLR361C	DCR2	222.567	194 - 250	327.758	280 - 382	1.48414	1.27237	0.00945776	0.0292952	not	500.858	456 - 556	2.26494	1.37712	0.00271177	0.0136608	not	525.317	517 - 535	2.37925	1.27906	0.00481496	0.0536091	not	reliable
YDL091C	UBX3	223.156	196 - 254	310.756	254 - 379	1.3851	1.18746	0.0524217	0.0983429	not	433.188	376 - 488	1.93798	1.17832	0.0416165	0.0825325	not	442.65	430 - 456	1.98464	1.06692	0.254392	0.413333	not	reliable
YPR031W	NTO1	223.635	208 - 242	297.635	260 - 338	1.33248	1.14235	0.0475812	0.0913196	not	436.385	424 - 450	1.95375	1.18791	0.013302	0.0367902	not	411.86	360 - 479	1.84148	0.989962	0.865845	0.922165	not	reliable
YNR011C	PRP2	223.725	223 - 223	301.223	278 - 324	1.34816	1.15579	0.0273892	0.0608601	not	429.526	423 - 434	1.92577	1.1709	0.0172186	0.0434492	not	376.055	350 - 405	1.68584	0.906291	0.0914068	0.215505	not	reliable
YNL224C	SQS1	224.047	202 - 247	277.462	269 - 287	1.23936	1.06252	0.246901	0.330997	not	426.434	345 - 534	1.90253	1.15677	0.0614502	0.111335	not	484.622	470 - 502	2.16509	1.16393	0.0224547	0.0982243	not	reliable
YOR028C	CIN5	224.436	197 - 256	241.358	221 - 262	1.07589	0.92237	0.172036	0.248096	not	373.55	366 - 380	1.66432	1.01194	0.835229	0.869512	not	500.099	421 - 600	2.22502	1.19615	0.0335178	0.12029	not	reliable
YER079W	YER079W	224.624	152 - 329	210.761	181 - 238	0.935887	0.802346	0.0612152	0.110512	not	281.02	242 - 324	1.24915	0.759507	0.0312298	0.0668767	not	320.524	297 - 341	1.42842	0.767907	0.0255337	0.104068	not	reliable
YOR249C	APC5	224.703	162 - 310	251.593	218 - 288	1.11572	0.956517	0.606675	0.682043	not	325.119	319 - 330	1.4465	0.879494	0.145539	0.219102	not	395.772	393 - 398	1.7618	0.947128	0.489339	0.636275	not	reliable
YBL025W	RRN10	225.028	218 - 231	195.747	149 - 258	0.871814	0.747416	0.00600783	0.0223261	not	296.043	252 - 338	1.31663	0.800533	0.0129954	0.0362795	not	401.952	390 - 411	1.79291	0.963852	0.45685	0.608371	not	reliable
YMR165C	PAH1	225.384	215 - 236	335.105	288 - 393	1.48942	1.2769	0.00430427	0.0182223	not	471.885	458 - 487	2.09764	1.2754	0.00250136	0.0129676	not	448.249	399 - 501	1.99115	1.07042	0.237298	0.39615	not	reliable
YEL005C	VAB2	225.829	218 - 233	293.725	282 - 304	1.30187	1.11611	0.0572374	0.10528	not	391.701	355 - 428	1.73596	1.05549	0.352419	0.445427	not	400.726	380 - 423	1.77818	0.95593	0.375555	0.530511	not	reliable
YMR020W	FMS1	225.941	209 - 242	265.117	210 - 332	1.17881	1.0106	0.876157	0.903637	not	347.302	347 - 347	1.54531	0.939575	0.267884	0.358956	not	399.393	309 - 517	1.76979	0.95142	0.5244	0.664726	not	reliable
YPR008W	HAA1	226.017	170 - 306	346.709	287 - 420	1.5265	1.30868	0.0183364	0.0453877	not	489.118	404 - 585	2.16245	1.31481	0.0133374	0.0368522	not	503.135	NA	2.226	1.19667	0.0447245	0.141715	not	reliable
YKL086W	SRX1	226.698	223 - 231	258.265	220 - 299	1.13767	0.975333	0.67644	0.741032	not	380.661	367 - 392	1.68332	1.02349	0.633974	0.708087	not	624.975	327 - 1100	2.69917	1.45104	0.0366333	0.126882	not	reliable
YPL229W	YPL229W	226.944	180 - 270	254.628	238 - 273	1.13324	0.971541	0.691405	0.753775	not	342.801	310 - 380	1.52622	0.927967	0.349042	0.442542	not	409.928	368 - 454	1.82682	0.982083	0.804105	0.880431	not	reliable
YBL037W	APL3	227.143	226 - 227	347.908	327 - 369	1.53609	1.31691	0.00112365	0.0100879	not	456.027	404 - 522	2.01311	1.22401	0.00794132	0.0259481	not	456.867	434 - 481	2.01694	1.08429	0.13619	0.277183	not	reliable
YGR258C	RAD2	227.146	153 - 320	244.653	227 - 265	1.10456	0.94695	0.612427	0.686462	not	376.346	303 - 463	1.69679	1.03168	0.785293	0.832552	not	376.044	362 - 393	1.69775	0.912692	0.403886	0.558664	not	reliable
YDR130C	FIN1	227.376	186 - 280	210.742	180 - 245	0.926795	0.794552	0.0127534	0.035429	not	338.521	293 - 390	1.4883	0.904914	0.173562	0.253594	not	468.571	465 - 471	2.06089	1.10791	0.134293	0.274424	not	reliable
YMR147W	YMR147W	227.658	212 - 242	181.864	145 - 226	0.796717	0.683034	0.00323134	0.0156745	not	232.551	208 - 264	1.02485	0.623126	0.000332229	0.00618148	repressed	400.121	364 - 442	1.76627	0.949529	0.368601	0.524612	not	reliable
YHR038W	RRF1	228.124	202 - 251	289.679	259 - 322	1.27874	1.09628	0.145535	0.216903	not	396.636	NA	1.74982	1.06392	0.308061	0.401178	not	500.03	499 - 501	2.20731	1.18663	0.0180999	0.0881005	not	reliable
YDL146W	LDB17	228.458	222 - 231	240.766	220 - 265	1.05777	0.906837	0.0824751	0.138709	not	281.89	226 - 347	1.23172	0.748905	0.00890025	0.0281228	not	406.887	398 - 419	1.78751	0.960946	0.421676	0.575411	not	reliable
YJL209W	CBP1	228.458	224 - 231	331.318	272 - 413	1.45392	1.24646	0.0153944	0.0405626	not	440.716	367 - 529	1.92892	1.17282	0.0545845	0.101389	not	429.144	361 - 511	1.88174	1.0116	0.852534	0.912625	not	reliable
YIR005W	IST3	229.237	218 - 242	222.235	218 - 227	0.970703	0.832194	0.00724038	0.0248228	not	315.985	315 - 317	1.38029	0.839238	0.0125065	0.0354037	not	422.908	416 - 431	1.84803	0.993483	0.891711	0.936238	not	reliable
YOR223W	YOR223W	229.27	224 - 236	219.316	196 - 245	0.958975	0.82214	0.00703233	0.024507	not	312.691	248 - 385	1.3651	0.830004	0.0245549	0.0560143	not	420.43	399 - 443	1.83794	0.988057	0.804809	0.880431	not	reliable
YOR328W	PDR10	229.506	187 - 275	311.673	289 - 336	1.37082	1.17522	0.0537667	0.100265	not	430.577	334 - 539	1.88601	1.14673	0.1747	0.255127	not	406.871	396 - 417	1.79279	0.963784	0.584946	0.713847	not	reliable
YKR076W	ECM4	229.96	192 - 276	242.36	231 - 253	1.05242	0.902249	0.134625	0.203757	not	443.712	411 - 472	1.92763	1.17203	0.0468237	0.0902948	not	582.641	508 - 672	2.53129	1.3608	0.00321745	0.0475432	not	reliable
YKR075C	YKR075C	229.993	201 - 269	175.199	168 - 182	0.761592	0.652921	0.0002863	0.00660363	repressed	249.504	248 - 251	1.08484	0.659599	0.000407344	0.00652961	repressed	478.482	422 - 545	2.07938	1.11786	0.11088	0.242794	not	reliable
YIL165C	YIL165C	230.083	217 - 247	235.977	168 - 328	1.02369	0.877619	0.16039	0.234288	not	310.966	283 - 340	1.35155	0.821765	0.0131165	0.0364842	not	346.389	307 - 394	1.50656	0.809913	0.00742324	0.0623861	not	reliable
YGR127W	YGR127W	230.105	219 - 244	299.93	295 - 305	1.30483	1.11864	0.0496899	0.0944115	not	545.208	527 - 563	2.37315	1.44292	0.000370534	0.00625594	not	433.994	399 - 472	1.889	1.01551	0.760951	0.849573	not	reliable
YNR019W	ARE2	230.15	228 - 231	414.498	288 - 583	1.79849	1.54187	0.00297359	0.0152099	induced	509.842	485 - 535	2.22055	1.35013	0.00111618	0.00896902	not	369.867	366 - 373	1.61194	0.866561	0.0207793	0.0943023	not	reliable
YCL004W	PGS1	230.506	214 - 249	317.424	242 - 410	1.37637	1.17997	0.0619418	0.111432	not	445.452	427 - 462	1.93405	1.17593	0.0198665	0.0479987	not	493.341	382 - 637	2.13473	1.14761	0.105795	0.236233	not	reliable
YDR131C	YDR131C	230.739	182 - 296	281.989	237 - 337	1.2218	1.04746	0.560055	0.640193	not	368.265	329 - 410	1.59584	0.970299	0.687869	0.754574	not	380.942	348 - 412	1.65031	0.887189	0.141399	0.284105	not	reliable
YOR044W	IRC23	230.84	196 - 272	234.746	199 - 274	1.01257	0.868087	0.0840229	0.140571	not	331.04	279 - 385	1.42931	0.869042	0.100944	0.164204	not	463.681	407 - 529	2.00692	1.0789	0.26826	0.425963	not	reliable
YGR040W	KSS1	231.064	218 - 240	227.14	211 - 242	0.985526	0.844902	0.0177591	0.0445039	not	308.825	292 - 324	1.34153	0.815672	0.00897412	0.0282411	not	426.618	427 - 427	1.85491	0.997183	0.953944	0.974622	not	reliable
YJR110W	YMR1	231.552	169 - 312	288.219	252 - 332	1.245	1.06735	0.443798	0.530386	not	428.105	415 - 444	1.84944	1.12449	0.176874	0.257546	not	397.011	NA	1.71514	0.92204	0.322209	0.480722	not	reliable
YKL208W	CBT1	231.599	198 - 260	230.617	226 - 235	1.00391	0.860666	0.0388349	0.0785025	not	322.894	322 - 324	1.40595	0.854841	0.0386089	0.0778788	not	440.824	420 - 461	1.91968	1.032	0.60519	0.731244	not	reliable
YMR160W	YMR160W	231.821	221 - 244	303.048	288 - 318	1.30957	1.12271	0.0428259	0.0844868	not	456.376	440 - 472	1.97125	1.19855	0.0117792	0.0339222	not	427.79	356 - 516	1.84479	0.99174	0.894602	0.938751	not	reliable
YMR021C	MAC1	231.933	219 - 242	291.273	290 - 293	1.26115	1.0812	0.148283	0.220417	not	414.054	333 - 515	1.79064	1.08874	0.24366	0.332482	not	471.052	452 - 490	2.04089	1.09716	0.106794	0.237769	not	reliable
YIL119C	RPI1	232.188	206 - 261	328.561	312 - 347	1.41423	1.21244	0.0099672	0.0303031	not	472.521	450 - 495	2.03686	1.23845	0.00620665	0.0222464	not	439.058	330 - 582	1.882	1.01174	0.889945	0.935233	not	reliable
YJR022W	LSM8	232.333	226 - 237	220.01	186 - 259	0.946411	0.811369	0.0157244	0.0410417	not	318.313	244 - 400	1.37201	0.834203	0.0412576	0.0820221	not	476.598	466 - 486	2.05967	1.10726	0.0725497	0.187713	not	reliable
YHL047C	ARN2	232.398	171 - 319	338.041	297 - 388	1.45507	1.24745	0.0365396	0.0751248	not	402.741	330 - 482	1.7261	1.0495	0.621718	0.696453	not	313.11	301 - 325	1.34788	0.724605	0.00645282	0.0592486	not	reliable
YGL176C	YGL176C	232.448	131 - 389	342.446	341 - 344	1.52882	1.31067	0.0851856	0.142178	not	473.372	435 - 513	2.11167	1.28393	0.110412	0.175925	not	448.891	NA	2.0008	1.07561	0.607628	0.732868	not	reliable
YLL002W	RTT109	232.479	197 - 267	289.905	272 - 305	1.25685	1.07751	0.272774	0.357463	not	408.248	373 - 444	1.77288	1.07794	0.273932	0.365501	not	591.422	493 - 709	2.56268	1.37767	0.00506291	0.0545048	not	reliable
YHR167W	THP2	232.622	211 - 262	255.544	234 - 279	1.09958	0.942686	0.2762	0.360698	not	355.032	306 - 411	1.5271	0.928504	0.226031	0.313111	not	431.591	384 - 481	1.85571	0.99761	0.966222	0.979952	not	reliable
YOR161C	PNS1	232.712	227 - 238	279.102	199 - 401	1.19742	1.02656	0.768736	0.819908	not	441.273	351 - 555	1.89761	1.15378	0.0686622	0.121285	not	487.694	486 - 489	2.10138	1.12968	0.0368749	0.127096	not	reliable
YJL073W	JEM1	232.913	195 - 272	266.82	251 - 282	1.15677	0.991714	0.893634	0.917128	not	395.651	344 - 447	1.71491	1.04269	0.544038	0.626187	not	442.671	430 - 457	1.91923	1.03176	0.624227	0.745364	not	not
YLR271W	YLR271W	232.93	133 - 437	181.403	170 - 193	0.785999	0.673845	0.0292332	0.0638144	not	273.19	207 - 360	1.17581	0.71491	0.0695109	0.122554	not	503.137	471 - 533	2.18001	1.17195	0.284468	0.442627	not	reliable
YIL082W-A	YIL082W-A	232.947	191 - 279	272.384	250 - 294	1.18032	1.0119	0.867095	0.897071	not	333.147	264 - 416	1.43791	0.874276	0.185434	0.26761	not	480.227	400 - 564	2.08146	1.11897	0.179644	0.330704	not	not
YJR141W	YJR141W	233.3	182 - 306	271.817	243 - 302	1.16162	0.995871	0.95822	0.969013	not	391.369	322 - 468	1.67583	1.01893	0.819828	0.859331	not	430.333	410 - 449	1.84458	0.99163	0.908621	0.946787	not	reliable
YNR029C	YNR029C	233.46	176 - 296	284.411	222 - 355	1.22838	1.0531	0.613604	0.687373	not	416.245	350 - 497	1.81015	1.1006	0.303823	0.397231	not	549.506	415 - 721	2.37946	1.27918	0.0497563	0.151383	not	reliable
YNL253W	TEX1	233.536	220 - 248	249.724	245 - 255	1.07076	0.917974	0.104372	0.166713	not	370.992	327 - 418	1.59121	0.967483	0.5421	0.624337	not	473.515	461 - 484	2.03143	1.09208	0.10637	0.237141	not	reliable
YPR186C	PZF1	233.648	221 - 243	304.783	303 - 306	1.31009	1.12316	0.0485722	0.0928751	not	485.117	479 - 491	2.08624	1.26847	0.00336906	0.015417	not	557.4	551 - 565	2.39737	1.2888	0.00207467	0.0394875	not	reliable
YKL023W	YKL023W	233.847	199 - 278	244.245	215 - 275	1.04088	0.892356	0.127819	0.195233	not	301.397	288 - 315	1.28831	0.783312	0.00647631	0.0228676	not	380.324	344 - 420	1.626	0.874119	0.0587137	0.165381	not	reliable
YNL282W	POP3	233.916	173 - 303	188.325	168 - 211	0.819515	0.702579	0.006605	0.0235251	not	225.179	NA	0.979695	0.595671	0.00105111	0.00872994	repressed	410.538	365 - 465	1.78459	0.95938	0.647305	0.765452	not	reliable
YAL032C	PRP45	234.16	205 - 259	256.03	211 - 310	1.09634	0.939907	0.41491	0.503266	not	358.144	310 - 412	1.54101	0.93696	0.332045	0.425765	not	411.807	401 - 419	1.77278	0.953027	0.415461	0.569108	not	reliable
YPR155C	NCA2	234.315	207 - 267	254.175	185 - 355	1.08213	0.927723	0.392385	0.480821	not	472.568	369 - 588	2.00704	1.22031	0.0440614	0.0860833	not	397.006	396 - 399	1.69545	0.911459	0.117009	0.250872	not	reliable
YOR017W	PET127	234.939	222 - 246	398.463	356 - 442	1.70458	1.46135	0.000437654	0.00723738	not	565.319	483 - 658	2.41664	1.46936	0.000689339	0.00771295	not	475.91	395 - 562	2.03223	1.09251	0.186899	0.339141	not	reliable
YJR096W	YJR096W	235.194	212 - 264	263.102	221 - 309	1.11413	0.955156	0.503172	0.586188	not	395.096	336 - 474	1.67528	1.0186	0.7943	0.840754	not	523.289	332 - 836	2.1968	1.18098	0.180738	0.331816	not	reliable
YKL051W	SFK1	235.273	227 - 243	267.736	212 - 337	1.1398	0.977164	0.713408	0.772108	not	328.097	321 - 334	1.39763	0.849785	0.014508	0.0387192	not	435.295	387 - 488	1.853	0.996156	0.943291	0.967057	not	reliable
YHL032C	GUT1	235.396	215 - 251	303.557	298 - 308	1.29679	1.11175	0.0746747	0.128533	not	380.073	321 - 451	1.61856	0.984114	0.821092	0.860336	not	361.241	349 - 376	1.54356	0.829802	0.0118315	0.0751054	not	reliable
YHR061C	GIC1	235.64	213 - 261	288.446	281 - 296	1.22421	1.04953	0.349529	0.438442	not	354.764	348 - 361	1.50715	0.916373	0.126499	0.19629	not	464.971	341 - 615	1.96514	1.05644	0.510989	0.655235	not	reliable
YPL193W	RSA1	236.074	216 - 260	261.865	206 - 339	1.10916	0.950895	0.480286	0.563939	not	428.24	367 - 502	1.81517	1.10365	0.129865	0.200523	not	450.096	406 - 498	1.90789	1.02566	0.642721	0.761943	not	reliable
YNL024C	YNL024C	236.276	212 - 257	218.215	186 - 257	0.929667	0.797013	0.00929902	0.0290151	not	309.462	260 - 365	1.3179	0.801306	0.0107989	0.0318783	not	519.18	485 - 553	2.21181	1.18905	0.0189076	0.0900182	not	reliable
YMR284W	YKU70	236.679	142 - 359	267.889	243 - 294	1.16472	0.998529	0.990529	0.993515	not	417.364	411 - 424	1.81902	1.106	0.421512	0.512484	not	532.771	480 - 593	2.32102	1.24776	0.110173	0.241818	not	reliable
YOR003W	YSP3	236.786	190 - 295	195.506	186 - 207	0.82551	0.707718	0.00173489	0.011601	not	244.803	239 - 253	1.03381	0.628571	0.000439093	0.00663013	repressed	451.921	440 - 466	1.9085	1.02599	0.693123	0.801079	not	reliable
YNL250W	RAD50	236.876	208 - 273	322.981	319 - 326	1.36356	1.16899	0.0231841	0.053985	not	502.545	369 - 685	2.10613	1.28056	0.0317995	0.0677696	not	463.697	388 - 553	1.95468	1.05082	0.470944	0.621073	not	reliable
YDR336W	YDR336W	237.033	236 - 236	251.958	237 - 268	1.06645	0.914279	0.0915168	0.150646	not	335.76	308 - 368	1.42139	0.864227	0.0246383	0.0561686	not	374.802	372 - 377	1.58671	0.852997	0.0140457	0.0796813	not	reliable
YBR275C	RIF1	237.145	211 - 259	290.056	265 - 318	1.22892	1.05357	0.399576	0.4877	not	400.567	379 - 424	1.69977	1.03349	0.585717	0.664823	not	472.273	468 - 475	2.00582	1.07831	0.203661	0.358626	not	reliable
YHL035C	VMR1	237.422	228 - 249	355.181	340 - 370	1.49795	1.28421	0.00192507	0.0120944	not	454.885	373 - 554	1.91317	1.16324	0.0654201	0.116767	not	408.763	365 - 456	1.7246	0.927129	0.192895	0.345586	not	reliable
YEL025C	YEL025C	237.635	200 - 275	404.002	389 - 422	1.71657	1.47163	0.000878262	0.00931979	not	519.076	472 - 572	2.20261	1.33922	0.00531551	0.0204479	not	437.666	372 - 515	1.85644	0.998004	0.977856	0.985645	not	reliable
YLR299W	ECM38	237.845	228 - 248	372.467	316 - 436	1.56887	1.34501	0.00256771	0.0140352	not	531.592	486 - 585	2.23994	1.36192	0.00101011	0.00858222	not	570.319	522 - 628	2.40214	1.29137	0.00233558	0.0414288	not	reliable
YPL132W	COX11	237.935	229 - 244	244.893	194 - 307	1.03305	0.885649	0.110431	0.174017	not	385.142	337 - 438	1.62221	0.986329	0.829143	0.865406	not	440.731	349 - 557	1.8551	0.997282	0.968747	0.981062	not	reliable
YOR037W	CYC2	238.179	210 - 273	234.663	198 - 274	0.980927	0.840959	0.0417551	0.0826336	not	383.637	347 - 420	1.60934	0.978503	0.721711	0.781693	not	473.49	457 - 491	1.9892	1.06938	0.233384	0.392396	not	reliable
YOL018C	TLG2	238.238	168 - 322	203.788	194 - 214	0.870667	0.746432	0.0176693	0.044353	not	310.061	241 - 395	1.31829	0.801544	0.0873631	0.146668	not	404.526	NA	1.71563	0.922303	0.519208	0.660513	not	reliable
YER139C	RTR1	238.26	168 - 326	203.821	184 - 228	0.873385	0.748763	0.021756	0.0515942	not	354.862	288 - 431	1.51325	0.92008	0.460524	0.549868	not	450.058	443 - 456	1.92852	1.03675	0.701581	0.806861	not	reliable
YER093C-A	AIM11	238.434	185 - 315	247.655	246 - 248	1.03809	0.889969	0.154749	0.227555	not	347.235	322 - 375	1.45461	0.88443	0.161836	0.239432	not	408.028	313 - 539	1.70384	0.915968	0.369503	0.525499	not	reliable
YHR097C	YHR097C	238.437	211 - 261	281.357	251 - 308	1.18584	1.01664	0.78407	0.832182	not	404.767	391 - 417	1.70997	1.03969	0.500099	0.586717	not	572.73	466 - 716	2.41215	1.29675	0.0111039	0.0729051	not	reliable
YHR075C	PPE1	238.448	211 - 264	265.677	238 - 292	1.12287	0.962651	0.51711	0.599953	not	383.034	297 - 481	1.60978	0.978775	0.797934	0.843258	not	353.222	338 - 371	1.49255	0.802382	0.00846502	0.0656735	not	reliable
YEL011W	GLC3	238.972	192 - 287	306.935	301 - 313	1.29949	1.11407	0.154477	0.227236	not	730.532	628 - 838	3.08766	1.87735	0.000226197	0.0060363	induced	617.202	551 - 691	2.61266	1.40454	0.00304922	0.0462512	not	reliable
YBL091C-A	SCS22	238.972	188 - 284	315.425	312 - 318	1.33488	1.1444	0.0907353	0.149621	not	470.932	435 - 508	1.99454	1.21271	0.0319952	0.0680574	not	458.666	413 - 505	1.94156	1.04377	0.556598	0.69159	not	reliable
YFL034W	YFL034W	239.171	236 - 242	275.185	272 - 278	1.15353	0.988935	0.80894	0.851906	not	380.829	316 - 459	1.59557	0.970131	0.623464	0.698003	not	353.254	300 - 417	1.47889	0.795038	0.00930528	0.0682446	not	reliable
YJL149W	DAS1	239.426	205 - 281	289.98	273 - 308	1.21134	1.0385	0.503551	0.586509	not	460.257	448 - 475	1.92183	1.16851	0.0358317	0.0738315	not	463.598	413 - 514	1.9357	1.04061	0.513286	0.656074	not	reliable
YCL016C	DCC1	239.728	213 - 266	283.833	262 - 309	1.19284	1.02264	0.694799	0.756747	not	409.434	396 - 424	1.71989	1.04572	0.45579	0.545252	not	483.364	467 - 499	2.03129	1.092	0.153894	0.29994	not	reliable
YOR358W	HAP5	239.759	190 - 303	214.821	199 - 234	0.89597	0.768125	0.00839506	0.0272928	not	323.329	315 - 332	1.34768	0.819412	0.0290487	0.0630991	not	376.603	321 - 446	1.56836	0.843136	0.0596425	0.166751	not	reliable
YKL090W	CUE2	240.04	238 - 241	260.675	216 - 314	1.08378	0.929137	0.298386	0.384874	not	343.104	319 - 365	1.43445	0.872168	0.0293095	0.0635638	not	443.204	359 - 538	1.84778	0.993349	0.918944	0.952455	not	reliable
YER059W	PCL6	240.183	191 - 307	299.354	286 - 311	1.24615	1.06834	0.355609	0.443707	not	540.239	494 - 593	2.24647	1.36589	0.00563655	0.0210014	not	569.208	477 - 673	2.36479	1.27129	0.022689	0.0985948	not	reliable
YKL105C	YKL105C	240.283	204 - 281	317.077	300 - 336	1.31775	1.12972	0.0747381	0.128603	not	453.234	382 - 544	1.88493	1.14607	0.0803754	0.137592	not	431.543	420 - 445	1.79641	0.96573	0.542772	0.680239	not	reliable
YLR289W	GUF1	240.53	227 - 250	234.58	195 - 276	0.974952	0.835837	0.0395699	0.0794771	not	344.092	272 - 425	1.4361	0.873174	0.0785501	0.135204	not	516.531	346 - 750	2.13741	1.14905	0.203201	0.358151	not	reliable
YOL043C	NTG2	240.942	231 - 247	253.335	250 - 256	1.0557	0.905062	0.0783285	0.133121	not	343.104	319 - 367	1.43091	0.870017	0.0315021	0.0673123	not	425.968	385 - 475	1.77527	0.954365	0.40215	0.557217	not	reliable
YIR018W	YAP5	241.556	192 - 293	260.134	194 - 339	1.07972	0.925655	0.44873	0.53522	not	364.099	343 - 388	1.52609	0.927889	0.317651	0.410407	not	432.752	390 - 487	1.81255	0.974407	0.725748	0.824925	not	reliable
YHR164C	DNA2	241.645	178 - 311	312.219	213 - 455	1.30704	1.12054	0.364144	0.452676	not	489.3	485 - 494	2.06005	1.25255	0.0360745	0.0742495	not	414.151	274 - 617	1.72572	0.92773	0.547891	0.683878	not	reliable
YGL083W	SCY1	242.055	214 - 274	301.514	290 - 312	1.24535	1.06765	0.232211	0.314911	not	390.765	370 - 418	1.61585	0.982463	0.736724	0.794454	not	417.309	350 - 498	1.72233	0.925908	0.251546	0.410159	not	reliable
YIL001W	YIL001W	242.335	209 - 270	299.86	232 - 384	1.24573	1.06798	0.433887	0.521254	not	429.409	408 - 448	1.78622	1.08605	0.220504	0.306883	not	410.586	402 - 422	1.70901	0.918749	0.189096	0.342249	not	reliable
YCR092C	MSH3	242.357	205 - 277	388.747	337 - 448	1.61917	1.38814	0.00320649	0.0156059	not	462.667	442 - 482	1.92747	1.17194	0.0420203	0.0831876	not	501.944	432 - 590	2.08789	1.12243	0.145663	0.289993	not	reliable
YGR122W	YGR122W	242.424	189 - 299	304.917	285 - 328	1.27153	1.09009	0.274615	0.359044	not	413.282	391 - 438	1.72551	1.04914	0.530314	0.612634	not	554.959	530 - 581	2.31851	1.24641	0.0207249	0.0942674	not	reliable
YBR072W	HSP26	242.623	241 - 242	193.972	181 - 209	0.800883	0.686606	0.00038738	0.00716439	not	349.07	181 - 622	1.40042	0.851477	0.331142	0.424992	not	385.235	326 - 458	1.5909	0.85525	0.0366711	0.126935	not	reliable
YEL059C-A	SOM1	242.814	199 - 288	245.33	190 - 311	1.01339	0.868794	0.156109	0.229152	not	473.089	471 - 475	1.9693	1.19737	0.0335446	0.0704786	not	775.826	745 - 810	3.22956	1.73618	0.000185508	0.0180177	induced	reliable
YPR121W	THI22	243.069	239 - 246	330.837	323 - 339	1.36572	1.17084	0.0151732	0.0401214	not	391.034	336 - 455	1.61438	0.981572	0.750395	0.804899	not	445.021	330 - 598	1.82771	0.982557	0.831429	0.898585	not	reliable
YCL029C	BIK1	243.234	202 - 298	283.925	283 - 285	1.16654	1.00009	0.998871	0.999048	not	397.307	339 - 460	1.63242	0.992536	0.914284	0.933091	not	448.206	NA	1.84275	0.990643	0.879483	0.928831	not	reliable
YMR293C	HER2	243.593	216 - 266	323.089	315 - 331	1.33507	1.14457	0.0468003	0.0901269	not	492.61	411 - 597	2.02954	1.23399	0.0288583	0.0629825	not	586.415	570 - 599	2.42525	1.30379	0.00311123	0.0467704	not	reliable
YDL017W	CDC7	243.646	197 - 301	259.88	202 - 334	1.06503	0.913063	0.295001	0.380941	not	332.981	311 - 358	1.36494	0.829907	0.0345931	0.072027	not	414.36	323 - 524	1.69403	0.910695	0.297498	0.456993	not	reliable
YKL033W	TTI1	244.215	221 - 271	345.715	333 - 359	1.41694	1.21476	0.00691948	0.0242632	not	484.061	416 - 557	1.97897	1.20325	0.0269107	0.0599802	not	437.134	402 - 470	1.79126	0.962963	0.487616	0.634628	not	reliable
YCR089W	FIG2	244.439	219 - 268	286.445	263 - 310	1.17754	1.00952	0.870958	0.899915	not	374.32	361 - 388	1.54115	0.937046	0.287142	0.379647	not	409.96	404 - 415	1.68892	0.907947	0.115604	0.249184	not	reliable
YLR260W	LCB5	244.672	227 - 266	409.448	389 - 436	1.67602	1.43687	0.000326545	0.00682635	not	565.418	558 - 574	2.31442	1.4072	0.000504284	0.00692289	not	535.878	457 - 632	2.19024	1.17745	0.0315825	0.115843	not	reliable
YBR293W	VBA2	244.952	204 - 286	264.578	227 - 304	1.08693	0.931836	0.366929	0.45552	not	385.764	351 - 426	1.59132	0.967549	0.625851	0.70026	not	408.726	403 - 413	1.68615	0.906458	0.164372	0.312999	not	reliable
YCR061W	YCR061W	245.003	142 - 445	388.645	287 - 523	1.59121	1.36416	0.0630222	0.112802	not	467.584	411 - 529	1.91538	1.16458	0.267859	0.358956	not	392.054	371 - 417	1.6093	0.865144	0.26877	0.426653	not	reliable
YCL026C-B	HBN1	245.241	235 - 253	193.581	154 - 243	0.787132	0.674817	0.00246788	0.0136701	not	286.709	285 - 288	1.17473	0.714256	0.000658857	0.00762064	not	525.21	394 - 692	2.14133	1.15116	0.116988	0.250872	not	reliable
YER157W	COG3	245.473	216 - 275	330.939	272 - 399	1.3421	1.1506	0.081826	0.13774	not	440.014	381 - 497	1.79018	1.08846	0.212835	0.299228	not	431.543	NA	1.7592	0.945728	0.308829	0.468043	not	reliable
YGR028W	MSP1	245.541	229 - 263	258.88	239 - 279	1.05619	0.905482	0.0775793	0.132205	not	392.435	295 - 517	1.58905	0.96617	0.692184	0.757545	not	462.375	425 - 499	1.88589	1.01384	0.783236	0.866755	not	reliable
YLR102C	APC9	245.787	209 - 284	256.312	254 - 258	1.05173	0.90166	0.13065	0.198484	not	378.085	346 - 413	1.55272	0.944083	0.383421	0.476726	not	553.786	459 - 675	2.26901	1.2198	0.0351	0.123317	not	reliable
YOR140W	SFL1	246.23	198 - 303	251.783	220 - 290	1.02251	0.876607	0.0889865	0.147425	not	351.636	328 - 377	1.42811	0.868316	0.0650993	0.116299	not	424.124	393 - 460	1.72174	0.92559	0.26315	0.421507	not	reliable
YNL293W	MSB3	246.23	201 - 302	315.393	282 - 355	1.27719	1.09495	0.222256	0.304081	not	430.381	376 - 488	1.74732	1.0624	0.389438	0.482511	not	480.848	415 - 559	1.94972	1.04815	0.518837	0.660486	not	reliable
YEL020C	YEL020C	246.342	221 - 275	318.793	292 - 342	1.29525	1.11043	0.0822331	0.138343	not	423.89	363 - 491	1.72132	1.04659	0.45164	0.540973	not	393.248	326 - 475	1.59418	0.857014	0.0506812	0.152882	not	reliable
YOL075C	YOL075C	246.454	238 - 253	328.468	322 - 335	1.33631	1.14563	0.0226519	0.0530735	not	397.692	340 - 460	1.61745	0.983436	0.766579	0.817453	not	425.189	241 - 819	1.69074	0.908926	0.508241	0.652072	not	reliable
YLL032C	YLL032C	246.476	243 - 248	342.747	328 - 357	1.3938	1.19492	0.00941146	0.0292135	not	502.78	398 - 634	2.03629	1.2381	0.0283912	0.0623614	not	622.753	559 - 697	2.53415	1.36233	0.000938607	0.031228	not	reliable
YJL126W	NIT2	246.521	238 - 253	252.527	203 - 312	1.02268	0.876758	0.109495	0.172989	not	375.741	341 - 409	1.52933	0.929856	0.237295	0.325489	not	414.274	408 - 420	1.68855	0.907748	0.0887829	0.212059	not	reliable
YLR436C	ECM30	246.88	168 - 351	326.567	313 - 339	1.35235	1.15938	0.170569	0.246548	not	527.912	466 - 598	2.18569	1.32894	0.0291539	0.0632748	not	513.003	493 - 533	2.12462	1.14217	0.2097	0.365956	not	reliable
YMR170C	ALD2	246.897	178 - 348	303.483	277 - 329	1.22794	1.05273	0.593429	0.670349	not	417.599	390 - 442	1.69363	1.02975	0.753464	0.807731	not	509.224	437 - 597	2.06198	1.1085	0.313536	0.472392	not	reliable
YOL135C	MED7	247.101	203 - 293	290.287	251 - 337	1.18704	1.01766	0.803873	0.847797	not	387.422	295 - 498	1.57974	0.960511	0.641753	0.715082	not	527.158	505 - 549	2.15575	1.15891	0.0582931	0.164524	not	reliable
YIL042C	PKP1	247.256	228 - 266	273.792	267 - 279	1.10837	0.95022	0.301853	0.388283	not	406.794	315 - 525	1.64386	0.999492	0.994309	0.995189	not	410.57	397 - 421	1.66337	0.894212	0.0533997	0.157143	not	reliable
YOR069W	VPS5	247.3	237 - 257	334.474	311 - 357	1.35368	1.16053	0.0226906	0.0531201	not	404.482	398 - 413	1.63936	0.996757	0.947712	0.958045	not	516.691	515 - 520	2.09497	1.12623	0.0403516	0.133311	not	reliable
YGL154C	LYS5	247.3	236 - 257	227.038	186 - 274	0.920277	0.788964	0.00547529	0.0210668	not	327.898	286 - 377	1.32899	0.808051	0.0070171	0.0240976	not	421.597	330 - 547	1.70173	0.914835	0.261242	0.419529	not	reliable
YDL110C	TMA17	247.379	239 - 252	238.113	175 - 316	0.964993	0.827299	0.0447909	0.087569	not	381.931	345 - 422	1.54882	0.94171	0.326134	0.41923	not	485.203	457 - 515	1.9703	1.05921	0.283361	0.441269	not	reliable
YGL163C	RAD54	247.39	237 - 256	303.034	231 - 392	1.22102	1.04679	0.574217	0.653738	not	426.298	396 - 461	1.73197	1.05306	0.346736	0.440508	not	450.09	414 - 488	1.82793	0.982677	0.744792	0.838484	not	reliable
YHL038C	CBP2	247.412	231 - 260	320.297	270 - 383	1.29576	1.11087	0.1589	0.232473	not	462.567	427 - 504	1.88056	1.14341	0.043622	0.0855203	not	394.426	276 - 580	1.58943	0.854459	0.143185	0.286533	not	reliable
YLR297W	YLR297W	247.457	221 - 273	374.538	366 - 384	1.52378	1.30636	0.00289871	0.015016	not	650.399	568 - 756	2.64154	1.6061	0.000491636	0.00683218	induced	687.009	626 - 747	2.79546	1.50281	0.000513202	0.0257459	induced	reliable
YPL039W	YPL039W	247.547	204 - 298	271.923	238 - 310	1.11092	0.952404	0.495755	0.579456	not	436.501	403 - 471	1.78129	1.08306	0.294018	0.386737	not	471.143	352 - 624	1.91442	1.02917	0.760418	0.849146	not	reliable
YBR138C	YBR138C	247.547	200 - 292	252.134	244 - 258	1.02871	0.88192	0.105276	0.167779	not	409.703	380 - 436	1.67382	1.01771	0.799307	0.84455	not	537.749	435 - 660	2.19112	1.17792	0.0831213	0.203609	not	reliable
YMR227C	TAF7	247.636	181 - 317	251.375	240 - 262	1.02968	0.882758	0.168636	0.244196	not	372.396	368 - 376	1.52728	0.92861	0.386654	0.480147	not	411.78	373 - 460	1.6884	0.907669	0.272162	0.430298	not	reliable
YCL039W	GID7	247.855	183 - 328	407.782	357 - 466	1.64056	1.40647	0.00566845	0.0215377	not	629.925	602 - 655	2.54196	1.54555	0.00131396	0.00961186	induced	478.375	394 - 571	1.92667	1.03576	0.678654	0.791746	not	reliable
YFR029W	PTR3	248.113	228 - 269	277.244	249 - 312	1.11937	0.959651	0.429474	0.517161	not	407.628	399 - 415	1.64568	1.0006	0.990243	0.992172	not	454.343	413 - 498	1.83314	0.985479	0.781923	0.86564	not	reliable
YBR235W	YBR235W	248.169	240 - 256	434.032	381 - 497	1.7539	1.50364	0.000298404	0.0066909	induced	554.242	553 - 555	2.23959	1.36171	0.000752317	0.00771295	not	472.88	462 - 484	1.91104	1.02736	0.571548	0.704133	not	reliable
YDR147W	EKI1	248.592	239 - 258	363.637	345 - 380	1.46672	1.25743	0.00259424	0.0140951	not	550.163	453 - 662	2.21674	1.34782	0.00262951	0.0133987	not	485.88	441 - 535	1.95881	1.05304	0.342321	0.501598	not	reliable
YGR104C	SRB5	248.738	222 - 273	296.367	254 - 344	1.19987	1.02866	0.649339	0.717738	not	386.667	358 - 415	1.56574	0.951996	0.401279	0.493613	not	540.12	528 - 553	2.18703	1.17573	0.0236389	0.100298	not	reliable
YPL253C	VIK1	249.195	217 - 283	363.077	316 - 422	1.46879	1.25921	0.0111919	0.0326821	not	514.026	480 - 549	2.07982	1.26456	0.00745714	0.0249572	not	485.954	359 - 655	1.95517	1.05108	0.579948	0.710925	not	reliable
YKL017C	HCS1	249.284	199 - 304	322.213	294 - 355	1.30845	1.12175	0.14531	0.216796	not	474.274	380 - 591	1.91549	1.16465	0.138662	0.211395	not	430.36	385 - 479	1.74607	0.93867	0.411531	0.565093	not	reliable
YGR096W	TPC1	249.696	206 - 298	225.863	208 - 244	0.914844	0.784306	0.0107705	0.0318609	not	311.552	302 - 321	1.26119	0.766823	0.00870941	0.0276278	not	479.612	404 - 566	1.9393	1.04255	0.589217	0.717	not	reliable
YGL136C	MRM2	249.906	245 - 253	248.507	226 - 268	0.995392	0.85336	0.0225238	0.0529047	not	391.633	338 - 457	1.5678	0.953247	0.469525	0.558258	not	479.633	430 - 534	1.92442	1.03455	0.526549	0.666404	not	reliable
YMR213W	CEF1	250.153	199 - 305	294.174	263 - 335	1.19095	1.02101	0.780643	0.830259	not	370.322	344 - 402	1.49928	0.911586	0.235332	0.323224	not	435.22	397 - 482	1.76079	0.946586	0.471178	0.621208	not	reliable
YLR135W	SLX4	250.475	222 - 278	204.221	180 - 231	0.821836	0.704569	0.0011918	0.0102625	not	356.57	341 - 374	1.43397	0.871877	0.0592208	0.108084	not	609.309	516 - 709	2.44721	1.3156	0.007133	0.0619553	not	reliable
YBR156C	SLI15	250.585	215 - 294	317.218	314 - 320	1.26567	1.08508	0.169032	0.244687	not	473.725	465 - 481	1.89098	1.14975	0.0441906	0.0862762	not	476.67	383 - 593	1.89713	1.01988	0.791461	0.872783	not	reliable
YGL108C	YGL108C	250.641	223 - 279	262.85	243 - 281	1.04971	0.899931	0.0732872	0.126799	not	335.09	325 - 345	1.33821	0.813656	0.00683193	0.0236665	not	404.313	NA	1.60479	0.86272	0.121448	0.25756	not	reliable
YPR049C	ATG11	250.73	241 - 261	366.667	280 - 464	1.45577	1.24805	0.0222861	0.052454	not	481.103	469 - 492	1.92374	1.16967	0.0163221	0.0420009	not	467.412	379 - 580	1.86374	1.00193	0.977192	0.985204	not	reliable
YIL155C	GUT2	250.764	246 - 254	267.972	246 - 291	1.06982	0.917167	0.138019	0.207506	not	441.519	373 - 518	1.76139	1.07096	0.312947	0.406066	not	422.924	410 - 436	1.6923	0.909765	0.0856683	0.207245	not	reliable
YOL034W	SMC5	250.842	236 - 264	310.238	284 - 334	1.24121	1.0641	0.287069	0.372314	not	475.414	450 - 505	1.90437	1.15789	0.037502	0.0764917	not	415.511	416 - 416	1.66596	0.895602	0.0678299	0.179862	not	reliable
YPL134C	ODC1	250.865	231 - 269	314.476	237 - 398	1.25203	1.07338	0.392409	0.480821	not	492.642	375 - 643	1.96172	1.19276	0.0880528	0.147474	not	521.599	492 - 551	2.09224	1.12477	0.0674149	0.17935	not	reliable
YMR136W	GAT2	251.067	190 - 315	245.004	218 - 271	0.98794	0.846971	0.0929062	0.152312	not	504.995	373 - 657	2.03652	1.23824	0.0659691	0.117519	not	788.077	716 - 864	3.18638	1.71297	0.000588324	0.0266205	induced	not
YBR169C	SSE2	251.089	186 - 325	446.698	311 - 621	1.78905	1.53377	0.00883307	0.0281353	induced	676.33	603 - 757	2.73448	1.66261	0.0013238	0.00962396	induced	416.726	388 - 445	1.68726	0.907054	0.272672	0.430791	not	reliable
YMR194C-B	CMC4	251.154	239 - 261	298.979	298 - 300	1.19246	1.02231	0.634879	0.705962	not	421.329	419 - 423	1.68151	1.02239	0.65126	0.723395	not	465.493	454 - 480	1.85801	0.998846	0.980524	0.987508	not	reliable
YML088W	UFO1	251.243	242 - 258	346.534	308 - 390	1.38189	1.18471	0.0229967	0.0536368	not	501.428	489 - 515	2.00469	1.21889	0.00826705	0.0266278	not	561.165	493 - 644	2.24175	1.20514	0.0168436	0.085365	not	reliable
YOL009C	MDM12	251.509	226 - 277	294.156	211 - 413	1.16689	1.00039	0.996362	0.997609	not	456.109	454 - 458	1.81513	1.10363	0.0958125	0.157993	not	543.803	510 - 583	2.16402	1.16335	0.0239014	0.100925	not	reliable
YNR045W	PET494	251.599	243 - 260	322.731	314 - 332	1.28517	1.10179	0.0755667	0.129537	not	431.08	354 - 517	1.71021	1.03984	0.597062	0.674721	not	483.417	431 - 545	1.92535	1.03505	0.528561	0.667905	not	reliable
YLR306W	UBC12	251.854	212 - 298	287.328	273 - 301	1.13952	0.976924	0.689304	0.75221	not	425.962	391 - 460	1.68975	1.02739	0.66982	0.739653	not	654.91	624 - 690	2.60036	1.39793	0.00123842	0.0331967	not	reliable
YDR205W	MSC2	252.101	244 - 259	428.829	411 - 448	1.70898	1.46513	0.000263949	0.00660363	not	589.774	546 - 638	2.34837	1.42785	0.00068926	0.00771295	not	496.275	430 - 573	1.9754	1.06196	0.323349	0.481876	not	reliable
YAR073W	IMD1	252.479	248 - 255	249.747	196 - 316	0.991069	0.849654	0.0527754	0.0988403	not	237.409	211 - 265	0.943388	0.573596	4.69943e-05	0.0060363	repressed	558.743	449 - 696	2.21235	1.18934	0.0482652	0.148767	not	not
YDR458C	HEH2	252.602	228 - 279	502.211	307 - 833	1.9585	1.67904	0.00658803	0.0234942	induced	611.863	424 - 873	2.42384	1.47374	0.00662738	0.023239	not	772.408	447 - 1240	3.02444	1.62591	0.009521	0.0688434	not	reliable
YLR218C	COA4	252.667	207 - 317	253.677	239 - 267	1.00219	0.859187	0.0526152	0.0985728	not	448.498	427 - 473	1.77511	1.0793	0.256992	0.347276	not	621.546	584 - 660	2.45981	1.32237	0.00395268	0.0512948	not	reliable
YBR165W	UBS1	252.992	236 - 266	238.415	218 - 259	0.94537	0.810476	0.0103062	0.0309568	not	379.139	336 - 433	1.50683	0.916177	0.166252	0.244876	not	508.099	448 - 573	2.0182	1.08496	0.198234	0.351586	not	reliable
YBR006W	UGA2	253.09	201 - 311	272.557	241 - 308	1.07693	0.923265	0.252652	0.337028	not	450.555	439 - 462	1.78006	1.08231	0.246498	0.335707	not	489.594	427 - 555	1.93236	1.03882	0.589445	0.717047	not	reliable
YDR004W	RAD57	253.247	232 - 275	302.683	271 - 337	1.19361	1.0233	0.681333	0.745093	not	458.414	345 - 602	1.79933	1.09402	0.321772	0.415038	not	559.905	NA	2.2135	1.18995	0.0135452	0.0788891	not	reliable
YGL185C	YGL185C	254.026	218 - 296	252.708	211 - 297	0.994908	0.852946	0.0430558	0.0847629	not	337.563	242 - 459	1.31624	0.800298	0.0610156	0.110752	not	511.766	495 - 529	2.01547	1.0835	0.178475	0.329223	not	reliable
YCR027C	RHB1	254.228	251 - 256	300.563	293 - 308	1.18609	1.01685	0.728761	0.785567	not	429.009	369 - 506	1.69369	1.02979	0.609214	0.684536	not	515.481	483 - 550	2.0357	1.09437	0.115163	0.248538	not	reliable
YIL152W	YIL152W	254.317	231 - 279	267.389	222 - 322	1.05322	0.902935	0.191808	0.270946	not	408.098	344 - 483	1.61477	0.981808	0.776735	0.825327	not	488.321	474 - 503	1.93375	1.03957	0.491025	0.636797	not	reliable
YNR065C	YNR065C	254.34	226 - 282	317.225	275 - 368	1.25701	1.07765	0.264712	0.349652	not	472.535	412 - 534	1.86826	1.13593	0.105585	0.169569	not	690.563	566 - 825	2.73118	1.46826	0.00139532	0.0342229	not	reliable
YLR461W	PAU4	254.384	218 - 290	297.195	260 - 341	1.17574	1.00798	0.91023	0.931475	not	418.266	354 - 495	1.65468	1.00608	0.938253	0.950351	not	563.566	554 - 574	2.2371	1.20265	0.0229439	0.0987568	not	reliable
YGL254W	FZF1	254.519	184 - 326	228.422	169 - 308	0.909737	0.779927	0.0502024	0.0951238	not	281.655	198 - 386	1.11326	0.676882	0.0152957	0.0402123	not	443.87	414 - 471	1.77226	0.95275	0.56386	0.698067	not	reliable
YOR380W	RDR1	255.231	220 - 293	299.203	277 - 322	1.18311	1.0143	0.816308	0.856912	not	436.501	404 - 471	1.72411	1.04829	0.487401	0.575399	not	503.71	478 - 531	1.99142	1.07057	0.295657	0.455118	not	reliable
YER051W	JHD1	255.374	230 - 283	296.344	280 - 312	1.16007	0.994537	0.914392	0.934776	not	441.102	420 - 461	1.72811	1.05072	0.37551	0.469263	not	486.538	399 - 588	1.90228	1.02265	0.744302	0.8381	not	reliable
YFR003C	YPI1	255.388	185 - 331	328.255	224 - 468	1.28835	1.10451	0.431234	0.518618	not	451.16	341 - 571	1.79163	1.08934	0.406264	0.498228	not	535.212	515 - 558	2.13118	1.1457	0.142635	0.285876	not	reliable
YLR451W	LEU3	255.898	250 - 260	328.686	316 - 342	1.28687	1.10325	0.075902	0.129855	not	490.707	424 - 556	1.92258	1.16896	0.026381	0.0591402	not	613.037	483 - 759	2.39477	1.2874	0.0106414	0.0718683	not	reliable
YJL071W	ARG2	256.077	224 - 289	343.58	325 - 366	1.3534	1.16028	0.0429591	0.0846609	not	470.629	452 - 493	1.85266	1.12645	0.0985217	0.161285	not	538.9	539 - 539	2.12289	1.14125	0.0611183	0.168791	not	reliable
YOR034C	AKR2	256.142	214 - 307	375.706	345 - 407	1.46449	1.25552	0.00842328	0.0273151	not	489.016	444 - 535	1.90951	1.16101	0.0428511	0.084448	not	495.734	470 - 522	1.93553	1.04052	0.504364	0.648485	not	reliable
YAL031C	GIP4	256.274	171 - 397	367.565	356 - 378	1.43711	1.23205	0.074894	0.128797	not	557.555	536 - 580	2.18036	1.3257	0.0285571	0.0626042	not	480.934	447 - 519	1.88014	1.01075	0.915274	0.950393	not	reliable
YAL010C	MDM10	256.301	181 - 348	295.358	267 - 324	1.17575	1.00798	0.932431	0.949213	not	367.377	336 - 398	1.46042	0.887961	0.249948	0.339507	not	526.61	461 - 591	2.09426	1.12585	0.247505	0.405882	not	reliable
YDL080C	THI3	256.722	243 - 268	291.907	287 - 296	1.13871	0.976227	0.607309	0.682483	not	384.408	361 - 409	1.50082	0.912527	0.100268	0.163529	not	485.874	446 - 524	1.89613	1.01934	0.708799	0.811542	not	reliable
YPL161C	BEM4	256.879	237 - 279	282.986	193 - 409	1.09313	0.937157	0.538193	0.619711	not	353.458	336 - 373	1.38388	0.841422	0.0230718	0.0535911	not	426.687	348 - 529	1.66743	0.896394	0.162878	0.311019	not	reliable
YPL162C	YPL162C	256.923	227 - 289	203.871	197 - 211	0.799098	0.685075	0.000724857	0.00879784	not	286.442	271 - 305	1.12412	0.683481	0.000729476	0.00771295	not	432.817	398 - 474	1.69776	0.912699	0.172366	0.321644	not	reliable
YOR191W	ULS1	256.968	217 - 296	451.228	368 - 547	1.77232	1.51943	0.00157839	0.0111592	induced	607.411	497 - 741	2.38414	1.4496	0.00274728	0.013751	not	574.692	560 - 591	2.25893	1.21438	0.0203455	0.0935563	not	reliable
YLR001C	YLR001C	257.066	228 - 290	356.916	331 - 386	1.38709	1.18917	0.017086	0.0432192	not	509.929	418 - 607	1.98297	1.20568	0.0250602	0.0568555	not	509.919	487 - 534	1.98519	1.06722	0.240624	0.399572	not	reliable
YNL020C	ARK1	257.391	222 - 297	260.874	254 - 270	1.02218	0.876326	0.0755785	0.129537	not	360.269	296 - 431	1.41209	0.858574	0.0724055	0.126788	not	456.238	448 - 467	1.78995	0.962257	0.545348	0.681893	not	reliable
YJL049W	YJL049W	257.456	219 - 300	246.207	162 - 355	0.941508	0.807165	0.090655	0.149598	not	394.914	387 - 403	1.53449	0.932997	0.241579	0.330161	not	580.883	541 - 620	2.25647	1.21306	0.0134804	0.0787656	not	reliable
YGR036C	CAX4	257.579	243 - 269	248.421	202 - 306	0.966094	0.828243	0.0190945	0.0466225	not	371.811	339 - 406	1.4467	0.879615	0.0399298	0.0799727	not	449.991	374 - 538	1.74646	0.938878	0.347087	0.506351	not	reliable
YER045C	ACA1	258.173	153 - 387	237.583	184 - 299	0.940762	0.806525	0.152256	0.224905	not	355.635	313 - 406	1.41994	0.86335	0.254838	0.344741	not	691.971	606 - 793	2.75971	1.48359	0.0167213	0.0852526	not	reliable
YLR046C	YLR046C	258.327	206 - 312	397.933	309 - 492	1.5514	1.33003	0.0178866	0.0447216	not	471.55	465 - 479	1.84957	1.12457	0.152195	0.227187	not	551.22	531 - 570	2.16219	1.16237	0.0776087	0.194745	not	reliable
YNL329C	PEX6	258.347	228 - 293	411.631	359 - 469	1.5943	1.36681	0.00192199	0.0120944	not	495.288	478 - 513	1.91774	1.16602	0.0278923	0.0614805	not	440.113	344 - 549	1.69924	0.913493	0.238057	0.397066	not	reliable
YDL234C	GYP7	258.369	230 - 289	386.947	382 - 391	1.49889	1.28501	0.00214554	0.0128319	not	576.825	505 - 664	2.23033	1.35608	0.0026223	0.013374	not	589.437	527 - 663	2.28233	1.22696	0.00879004	0.0661349	not	reliable
YBR213W	MET8	258.482	255 - 259	290.204	254 - 329	1.12629	0.965584	0.514338	0.597595	not	416.83	389 - 444	1.61786	0.983685	0.740363	0.796707	not	524.115	494 - 557	2.03386	1.09339	0.108964	0.24013	not	reliable
YAR033W	MST28	258.502	239 - 278	277.204	275 - 278	1.07355	0.920364	0.115637	0.180426	not	327.469	313 - 344	1.26797	0.770946	0.00261961	0.0133723	not	483.695	482 - 486	1.87439	1.00765	0.873386	0.9274	not	reliable
YOR227W	HER1	258.594	239 - 281	418.238	416 - 421	1.62689	1.39475	0.000780256	0.0090347	not	607.643	574 - 648	2.36517	1.43806	0.00062077	0.0075023	not	480.795	358 - 648	1.86041	1.00014	0.998715	0.999245	not	reliable
YLR326W	YLR326W	258.972	249 - 269	199.675	156 - 261	0.773998	0.663557	0.000959697	0.00966535	repressed	293.268	273 - 316	1.13799	0.69192	0.000407523	0.00652961	not	534.029	452 - 635	2.06882	1.11218	0.124213	0.26156	not	reliable
YCR079W	PTC6	259.238	235 - 283	257.113	249 - 263	0.992498	0.850879	0.0142244	0.0383294	not	331.24	247 - 440	1.26851	0.771276	0.0269476	0.0600299	not	541.282	441 - 652	2.0854	1.12109	0.120298	0.255983	not	reliable
YDR381C-A	YDR381C-A	259.283	243 - 276	247.748	222 - 273	0.95471	0.818483	0.0103349	0.0309939	not	409.384	406 - 413	1.58178	0.96175	0.44072	0.530704	not	406.954	318 - 504	1.56682	0.842305	0.0511316	0.153666	not	reliable
YHR050W-A	YHR050W-A	259.385	220 - 295	163.142	159 - 166	0.633823	0.543383	0.000107763	0.00626999	repressed	244.458	212 - 283	0.951222	0.578359	0.000221145	0.0060363	repressed	452.606	440 - 469	1.76177	0.947112	0.399527	0.554262	not	reliable
YOR152C	YOR152C	260.107	234 - 284	307.619	286 - 330	1.18209	1.01342	0.797498	0.84264	not	357.524	333 - 383	1.37653	0.836952	0.0117048	0.0337422	not	358.112	321 - 400	1.37781	0.740698	0.00133967	0.0335026	not	reliable
YDR330W	UBX5	260.264	248 - 271	294.96	249 - 346	1.13388	0.972085	0.662085	0.727844	not	381.498	349 - 416	1.47311	0.895678	0.074254	0.129384	not	427.764	330 - 557	1.64421	0.883911	0.148045	0.292805	not	reliable
YJR089W	BIR1	260.331	235 - 283	311.205	296 - 323	1.20258	1.03098	0.58838	0.665975	not	459.287	431 - 488	1.77512	1.07931	0.239735	0.328315	not	445.091	400 - 491	1.72093	0.925156	0.22104	0.379412	not	reliable
YLR319C	BUD6	260.353	231 - 292	330.004	286 - 377	1.27341	1.09171	0.217305	0.298754	not	476.315	382 - 583	1.83573	1.11616	0.203329	0.288589	not	633.93	617 - 652	2.45407	1.31929	0.00311001	0.0467704	not	reliable
YIL046W	MET30	260.796	205 - 319	367.783	360 - 376	1.40911	1.20804	0.0234419	0.0543391	not	495.024	NA	1.89393	1.15154	0.121984	0.190644	not	501.837	NA	1.92255	1.03354	0.634484	0.75455	not	reliable
YHL021C	AIM17	261.02	251 - 269	301.248	265 - 339	1.15322	0.988664	0.839581	0.87517	not	588.302	576 - 601	2.25866	1.3733	0.000719278	0.00771295	not	549.916	446 - 677	2.10652	1.13244	0.0922457	0.216478	not	reliable
YJR093C	FIP1	261.256	224 - 304	344.516	279 - 422	1.32376	1.13487	0.15303	0.225812	not	478.64	367 - 627	1.8371	1.11699	0.263886	0.355113	not	521.666	466 - 580	2.01494	1.08321	0.260317	0.418996	not	reliable
YKR069W	MET1	261.578	245 - 279	307.61	302 - 314	1.18243	1.01371	0.786535	0.83386	not	396.285	396 - 396	1.52347	0.926298	0.18718	0.269868	not	476.51	382 - 591	1.8269	0.982125	0.79609	0.875668	not	reliable
YNL065W	AQR1	261.844	243 - 280	397.806	378 - 418	1.52027	1.30335	0.00155687	0.011133	not	586.664	573 - 600	2.24445	1.36466	0.00077023	0.00778844	not	585.775	572 - 604	2.24113	1.20481	0.00739372	0.0623861	not	reliable
YOR104W	PIN2	261.889	254 - 269	248.939	235 - 264	0.952927	0.816955	0.00443093	0.018587	not	403.863	365 - 446	1.54397	0.938757	0.283866	0.375918	not	622.169	593 - 653	2.38201	1.28054	0.00185845	0.0376827	not	reliable
YKL151C	YKL151C	261.956	253 - 268	280.464	275 - 286	1.07431	0.921014	0.126151	0.193203	not	419.708	363 - 494	1.60819	0.977808	0.695992	0.760389	not	531.492	530 - 533	2.03774	1.09547	0.0989423	0.226658	not	reliable
YJL131C	AIM23	261.979	249 - 272	190.611	189 - 192	0.730733	0.626465	9.23946e-05	0.00626999	repressed	294.807	280 - 311	1.1309	0.687609	0.000365023	0.00624932	not	473.424	378 - 593	1.81046	0.973284	0.69665	0.803313	not	reliable
YJL194W	CDC6	262.203	205 - 328	272.474	248 - 301	1.05357	0.903237	0.214388	0.295463	not	422.683	384 - 463	1.63175	0.992129	0.922069	0.93799	not	506.815	504 - 511	1.95968	1.05351	0.49092	0.636797	not	reliable
YBL021C	HAP3	262.312	253 - 270	231.484	230 - 233	0.883965	0.757833	0.00105415	0.00989871	not	306.215	300 - 312	1.16979	0.71125	0.000542197	0.00708237	not	437.075	406 - 479	1.66959	0.897556	0.0707635	0.184953	not	reliable
YMR115W	MGR3	262.511	212 - 327	273.51	234 - 319	1.03696	0.888994	0.16509	0.240158	not	560.9	560 - 562	2.13632	1.29892	0.00681175	0.0236218	not	578.297	471 - 700	2.19812	1.18169	0.0627234	0.171466	not	reliable
YPL138C	SPP1	262.604	211 - 320	328.17	282 - 380	1.26006	1.08026	0.354329	0.442501	not	497.865	479 - 517	1.91947	1.16707	0.0672118	0.119169	not	562.332	553 - 571	2.16799	1.16549	0.0649001	0.174968	not	reliable
YDR239C	YDR239C	262.657	236 - 291	368.301	327 - 415	1.39964	1.19993	0.0181078	0.0450094	not	562.724	549 - 577	2.14472	1.30403	0.00206602	0.0117672	not	493.869	485 - 504	1.88233	1.01192	0.813179	0.886022	not	reliable
YMR244C-A	YMR244C-A	262.78	261 - 263	304.283	285 - 324	1.15974	0.99426	0.908863	0.930581	not	540.591	534 - 546	2.06389	1.25488	0.00349591	0.015679	not	538.985	438 - 669	2.05233	1.10331	0.180524	0.331769	not	reliable
YHR031C	RRM3	262.959	225 - 300	392.851	364 - 425	1.50775	1.29261	0.00592699	0.0221502	not	565.421	443 - 704	2.16576	1.31682	0.0110518	0.0323881	not	530.287	497 - 569	2.0347	1.09384	0.186865	0.339141	not	reliable
YJR138W	IML1	263.425	221 - 312	332.054	315 - 350	1.26067	1.08078	0.208628	0.289145	not	400.902	388 - 414	1.52136	0.925011	0.230289	0.317765	not	488.337	457 - 525	1.85364	0.996496	0.953137	0.973973	not	reliable
YBR211C	AME1	263.45	217 - 315	324.899	312 - 338	1.24764	1.06961	0.342942	0.432193	not	421.281	NA	1.61663	0.982937	0.822853	0.861282	not	537.069	NA	2.0624	1.10872	0.17418	0.323926	not	reliable
YDR242W	AMD2	264.027	255 - 272	277.954	264 - 290	1.05397	0.90358	0.0726753	0.126206	not	353.223	NA	1.33766	0.813322	0.0151268	0.0399241	not	452.462	NA	1.71396	0.921409	0.225366	0.383128	not	reliable
YMR316W	DIA1	264.249	218 - 317	241.418	207 - 280	0.909419	0.779654	0.014636	0.0391202	not	441.083	343 - 572	1.65776	1.00795	0.93149	0.944854	not	711.6	664 - 758	2.69242	1.44742	0.00103075	0.0320326	not	reliable
YBR107C	IML3	264.45	255 - 273	226.571	185 - 284	0.858183	0.735729	0.00268355	0.0143326	not	349.009	348 - 349	1.32256	0.80414	0.00428894	0.0177067	not	425.36	398 - 456	1.61177	0.866472	0.0250585	0.103148	not	reliable
YLR226W	BUR2	264.574	247 - 280	345.84	325 - 365	1.3143	1.12676	0.0507026	0.0956871	not	504.321	445 - 573	1.913	1.16314	0.0457776	0.0886705	not	680.861	598 - 764	2.58462	1.38947	0.00148468	0.0351355	not	reliable
YMR304W	UBP15	265.454	244 - 285	438.722	415 - 459	1.66111	1.42409	0.000606638	0.00803006	not	673.117	557 - 806	2.54296	1.54616	0.000860518	0.00807429	induced	364.894	322 - 410	1.38196	0.742931	0.00210704	0.0394875	not	reliable
YBR208C	DUR1,2	265.686	245 - 288	372.946	326 - 430	1.40148	1.2015	0.0168971	0.0428947	not	505.427	499 - 510	1.90499	1.15826	0.0237656	0.0546194	not	395.791	375 - 415	1.49161	0.801872	0.00437956	0.0514808	not	reliable
YKR009C	FOX2	265.832	255 - 274	272.659	249 - 296	1.02809	0.881396	0.0533404	0.0996017	not	366.139	337 - 393	1.38194	0.840242	0.0204216	0.0490466	not	402.605	348 - 465	1.51952	0.81688	0.0132579	0.078388	not	reliable
YPR085C	ASA1	266.188	260 - 272	345.8	291 - 416	1.29688	1.11183	0.129227	0.196745	not	485.117	479 - 491	1.82745	1.11112	0.0662742	0.117765	not	600.554	551 - 659	2.26178	1.21591	0.00694345	0.0614314	not	reliable
YGL057C	GEP7	266.21	264 - 266	244.953	245 - 245	0.922553	0.790915	0.00234285	0.0134505	not	337.131	315 - 360	1.27069	0.772598	0.00188979	0.0113402	not	415.415	298 - 547	1.55608	0.836534	0.0681772	0.180192	not	reliable
YGR250C	YGR250C	266.255	256 - 273	440.059	334 - 556	1.64768	1.41257	0.00408032	0.0176409	not	726.919	664 - 804	2.73983	1.66587	0.000102006	0.0060363	induced	623.952	526 - 731	2.34991	1.26329	0.00768575	0.0637399	not	reliable
YAL056W	GPB2	267.057	262 - 269	416.374	304 - 549	1.54965	1.32853	0.0126747	0.0353662	not	564.445	496 - 641	2.11614	1.28665	0.00475136	0.0189251	not	517.911	505 - 532	1.94524	1.04574	0.362454	0.52026	not	reliable
YLR323C	CWC24	267.101	260 - 272	264.201	243 - 281	0.993232	0.851509	0.0144645	0.0387731	not	329.736	311 - 351	1.23834	0.752929	0.00203621	0.0116803	not	603.102	556 - 652	2.26607	1.21821	0.00918878	0.0680259	not	reliable
YGR062C	COX18	267.101	260 - 272	270.322	250 - 292	1.01628	0.871271	0.027494	0.0609827	not	372.196	339 - 404	1.39924	0.850759	0.0181768	0.0451726	not	480.853	420 - 553	1.80539	0.970559	0.606769	0.732057	not	reliable
YLR219W	MSC3	267.679	218 - 331	347.982	298 - 403	1.29974	1.11428	0.152964	0.225812	not	467.118	405 - 533	1.74468	1.06079	0.387953	0.481093	not	603.057	591 - 617	2.25305	1.21122	0.0184605	0.089119	not	reliable
YLR026C	SED5	267.948	263 - 270	275.796	221 - 340	1.02577	0.8794	0.126217	0.193203	not	405.804	400 - 413	1.51983	0.924083	0.154249	0.22995	not	631.31	486 - 826	2.35527	1.26617	0.0169407	0.0854744	not	reliable
YER077C	YER077C	268.082	237 - 298	308.036	302 - 312	1.15737	0.992223	0.890586	0.914848	not	451.089	432 - 473	1.69477	1.03045	0.630526	0.705073	not	601.78	545 - 672	2.26165	1.21584	0.0162375	0.0844658	not	reliable
YDL170W	UGA3	268.194	218 - 329	247.072	223 - 270	0.930272	0.797532	0.0240528	0.0554506	not	343.954	264 - 453	1.28878	0.783602	0.0494204	0.0943055	not	487.116	438 - 536	1.83815	0.98817	0.873807	0.9274	not	reliable
YPL168W	YPL168W	268.205	214 - 333	357	331 - 382	1.34652	1.15439	0.0939434	0.153834	not	484.931	397 - 585	1.82448	1.10932	0.274191	0.365591	not	553.064	528 - 582	2.08909	1.12307	0.151275	0.296674	not	reliable
YIL134W	FLX1	268.404	258 - 276	312.256	306 - 318	1.16822	1.00152	0.974351	0.981545	not	431.949	330 - 564	1.60583	0.976372	0.775584	0.824878	not	498.716	407 - 620	1.86127	1.0006	0.992907	0.996077	not	reliable
YOR138C	RUP1	268.494	242 - 297	370.568	366 - 376	1.38955	1.19127	0.0174922	0.0439752	not	522.088	497 - 548	1.95774	1.19034	0.0235256	0.0542884	not	498.255	409 - 609	1.86511	1.00266	0.970002	0.981384	not	reliable
YML005W	TRM12	268.503	211 - 336	303.566	281 - 326	1.12828	0.967287	0.630352	0.702251	not	456.576	399 - 522	1.69636	1.03142	0.686774	0.753686	not	601.866	550 - 649	2.24036	1.2044	0.0318052	0.116434	not	reliable
YGR068C	ART5	268.615	232 - 307	273.159	268 - 277	1.01673	0.871656	0.0370228	0.0757465	not	371.427	339 - 409	1.38341	0.841136	0.0204948	0.0491181	not	505.541	454 - 562	1.88161	1.01154	0.844077	0.906106	not	reliable
YDR020C	DAS2	268.615	231 - 305	227.524	200 - 258	0.844422	0.723933	0.00233329	0.0134503	not	372.061	355 - 390	1.38482	0.841994	0.0226484	0.0529335	not	534.039	438 - 639	1.98481	1.06701	0.360938	0.519325	not	reliable
YDL077C	VAM6	268.626	233 - 305	360.051	351 - 367	1.34081	1.14949	0.032158	0.0679691	not	492.313	412 - 597	1.83202	1.1139	0.132657	0.204111	not	541.999	520 - 567	2.01882	1.0853	0.162751	0.310881	not	reliable
YGL211W	NCS6	268.772	263 - 272	266.186	247 - 284	0.993328	0.851591	0.0127709	0.0354428	not	378.751	322 - 442	1.40829	0.856265	0.0572933	0.105211	not	511.798	457 - 571	1.90848	1.02598	0.637005	0.756594	not	reliable
YBL103C	RTG3	268.928	242 - 298	315.61	267 - 380	1.17664	1.00874	0.90275	0.924991	not	426.466	NA	1.59772	0.971439	0.627984	0.702508	not	503.164	443 - 571	1.88345	1.01252	0.84282	0.905588	not	reliable
YMR181C	YMR181C	269.517	243 - 296	317.368	310 - 325	1.17768	1.00964	0.846985	0.880615	not	453.615	416 - 493	1.68268	1.0231	0.692796	0.757921	not	619.051	548 - 693	2.29802	1.23539	0.00721229	0.062184	not	reliable
YHR091C	MSR1	269.719	253 - 283	312.237	255 - 379	1.163	0.997049	0.963516	0.97305	not	458.231	353 - 591	1.69817	1.03252	0.692153	0.757545	not	443.94	378 - 510	1.65279	0.888522	0.085905	0.207641	not	reliable
YER173W	RAD24	269.797	239 - 303	314.106	288 - 340	1.17351	1.00606	0.917001	0.936742	not	460.79	351 - 591	1.71178	1.04079	0.637994	0.711594	not	426.618	424 - 428	1.59386	0.856845	0.0317313	0.116238	not	reliable
YPL224C	MMT2	270.15	201 - 364	313.824	300 - 329	1.16018	0.994639	0.943022	0.957755	not	414.589	359 - 482	1.53401	0.932702	0.399854	0.492075	not	475.972	472 - 481	1.76214	0.947311	0.474152	0.623821	not	reliable
YHR016C	YSC84	270.574	206 - 364	272.698	224 - 333	1.00745	0.863694	0.122227	0.188411	not	381.277	311 - 474	1.40277	0.852909	0.129207	0.199671	not	482.087	419 - 556	1.77965	0.956724	0.589153	0.717	not	reliable
YNL115C	YNL115C	270.876	257 - 283	372.06	356 - 387	1.37645	1.18004	0.0113092	0.0329038	not	617.06	614 - 620	2.28239	1.38773	0.000608556	0.00743794	not	543.795	493 - 595	2.01097	1.08108	0.162375	0.310372	not	not
YPL213W	LEA1	271.79	271 - 272	258.406	247 - 273	0.952345	0.816456	0.00629438	0.0228505	not	337.18	293 - 387	1.2412	0.754668	0.00442182	0.0180089	not	487.084	476 - 500	1.79817	0.966676	0.484998	0.632645	not	reliable
YBR001C	NTH2	271.902	246 - 298	392.902	390 - 395	1.45384	1.2464	0.00535829	0.0207721	not	580.774	533 - 628	2.14748	1.30571	0.00399981	0.016946	not	512.976	499 - 527	1.89883	1.02079	0.701183	0.806816	not	reliable
YPL128C	TBF1	272	226 - 324	383.253	378 - 390	1.40889	1.20786	0.01493	0.0396636	not	508.825	424 - 609	1.86918	1.13649	0.101093	0.164306	not	408.129	388 - 435	1.50049	0.806649	0.010046	0.0702348	not	reliable
YMR028W	TAP42	272.045	237 - 312	303.668	229 - 399	1.10733	0.949327	0.540249	0.621593	not	436.334	396 - 475	1.60263	0.974424	0.671885	0.741644	not	590.791	509 - 681	2.16942	1.16626	0.0493216	0.150683	not	reliable
YPL133C	RDS2	272.381	237 - 307	258.931	256 - 263	0.957418	0.820805	0.0136881	0.0371674	not	396.755	338 - 461	1.46782	0.892458	0.120182	0.18861	not	472.267	466 - 480	1.74813	0.939779	0.305915	0.465122	not	reliable
YPL003W	ULA1	272.726	257 - 286	282.382	278 - 288	1.0406	0.892115	0.0546885	0.101716	not	438.828	436 - 441	1.61737	0.983386	0.750295	0.804899	not	545.096	504 - 585	2.00896	1.08	0.183116	0.335288	not	reliable
YOL107W	YOL107W	272.913	238 - 310	292.508	254 - 332	1.06885	0.916339	0.193527	0.272622	not	457.281	425 - 493	1.67665	1.01943	0.724865	0.784507	not	491.961	427 - 565	1.80172	0.968586	0.598924	0.725222	not	reliable
YJR030C	YJR030C	272.936	243 - 303	299.661	258 - 345	1.09879	0.942001	0.315039	0.403163	not	440.217	417 - 467	1.61436	0.981557	0.724171	0.783907	not	368.689	299 - 455	1.34819	0.724773	0.00351589	0.0492224	not	reliable
YDR191W	HST4	273.025	260 - 284	306.62	239 - 377	1.11812	0.958572	0.561463	0.641413	not	381.362	366 - 399	1.399	0.850613	0.0186408	0.04598	not	504.278	420 - 605	1.84714	0.993005	0.909863	0.947383	not	reliable
YGL208W	SIP2	273.07	270 - 274	292.323	277 - 309	1.07379	0.920573	0.112524	0.176592	not	397.393	290 - 563	1.45368	0.883859	0.164888	0.243182	not	505.471	376 - 667	1.84718	0.993026	0.929227	0.958196	not	reliable
YMR090W	YMR090W	273.132	145 - 491	265.219	262 - 268	0.98058	0.840662	0.260453	0.345317	not	445.072	318 - 634	1.63627	0.994877	0.974956	0.980852	not	406.828	349 - 470	1.50255	0.807755	0.18361	0.335866	not	reliable
YLR288C	MEC3	273.16	255 - 290	297.695	281 - 315	1.09425	0.938112	0.252644	0.337028	not	382.132	364 - 401	1.40563	0.854645	0.0275125	0.0610237	not	630.151	561 - 705	2.31819	1.24624	0.00681006	0.0608495	not	reliable
YBR102C	EXO84	273.205	248 - 298	429.195	365 - 493	1.58157	1.3559	0.00281407	0.0148059	not	505.694	495 - 517	1.86331	1.13293	0.0637546	0.11447	not	438.956	436 - 442	1.61797	0.869804	0.0385605	0.129898	not	reliable
YEL004W	YEA4	273.617	251 - 295	278.621	264 - 298	1.02476	0.878536	0.0449694	0.0877967	not	414.737	385 - 446	1.52395	0.926588	0.225612	0.312607	not	519.118	473 - 572	1.90839	1.02593	0.653165	0.770449	not	reliable
YGR021W	YGR021W	273.675	166 - 418	278.345	261 - 298	1.05016	0.900311	0.409272	0.497388	not	411.041	401 - 419	1.55077	0.942893	0.636279	0.710102	not	598.039	502 - 718	2.2518	1.21055	0.171789	0.321283	not	reliable
YAL002W	VPS8	273.692	225 - 336	369.467	363 - 375	1.34965	1.15707	0.0449272	0.0877748	not	510.81	397 - 653	1.85534	1.12808	0.203836	0.289164	not	447.558	404 - 491	1.63433	0.878599	0.0807629	0.199998	not	reliable
YGR171C	MSM1	273.827	251 - 297	310.271	304 - 317	1.13415	0.97232	0.560497	0.640439	not	494.636	494 - 495	1.80847	1.09958	0.100973	0.164204	not	524.701	517 - 534	1.91872	1.03149	0.533953	0.671717	not	reliable
YPL042C	SSN3	273.861	259 - 288	411.701	385 - 442	1.50383	1.28925	0.00218132	0.0129189	not	598.792	595 - 602	2.19017	1.33166	0.00118885	0.00912653	not	601.826	592 - 613	2.20169	1.18361	0.0112177	0.0732651	not	reliable
YMR231W	PEP5	274.051	249 - 301	407.065	351 - 460	1.49039	1.27773	0.00714287	0.0246601	not	643.574	549 - 750	2.35778	1.43357	0.00174604	0.0109848	not	693.207	605 - 804	2.54253	1.36684	0.00253662	0.0426857	not	reliable
YNL095C	YNL095C	274.474	252 - 298	409.107	369 - 453	1.49687	1.28328	0.004573	0.018852	not	463.839	413 - 515	1.7005	1.03393	0.562054	0.642478	not	416.142	400 - 435	1.52575	0.820226	0.00924624	0.0681532	not	reliable
YDR356W	SPC110	274.561	227 - 329	349.884	304 - 398	1.27434	1.09251	0.205169	0.285441	not	527.61	516 - 539	1.92184	1.16851	0.0375774	0.0765258	not	468.036	367 - 582	1.69913	0.913437	0.277145	0.435135	not	reliable
YDR132C	YDR132C	274.572	229 - 320	423.943	404 - 445	1.54249	1.3224	0.00304981	0.0154001	not	535.791	512 - 564	1.95177	1.18671	0.0256263	0.0578611	not	515.99	423 - 627	1.87458	1.00776	0.91552	0.950444	not	reliable
YPR111W	DBF20	274.763	267 - 282	344.914	339 - 352	1.25829	1.07874	0.13504	0.204057	not	548.337	529 - 574	2.0011	1.2167	0.00652788	0.0230042	not	546.911	540 - 554	1.99586	1.07295	0.170815	0.320177	not	reliable
YDL175C	AIR2	274.917	213 - 342	295.617	283 - 309	1.07505	0.921649	0.251268	0.335499	not	441.339	382 - 512	1.60438	0.975488	0.738286	0.795077	not	450.706	NA	1.63879	0.880997	0.10859	0.239755	not	reliable
YLR014C	PPR1	274.92	248 - 303	414.754	344 - 487	1.51245	1.29664	0.00815787	0.0267484	not	539.554	527 - 555	1.97615	1.20153	0.0151184	0.0399205	not	624.08	578 - 671	2.28435	1.22804	0.0119614	0.075506	not	reliable
YMR041C	ARA2	275.144	210 - 344	222.319	213 - 231	0.821082	0.703923	0.0050291	0.0200698	not	377.718	315 - 450	1.394	0.847575	0.106195	0.170249	not	509.336	451 - 577	1.87975	1.01053	0.903784	0.943834	not	reliable
YLR242C	ARV1	275.432	232 - 321	316.95	270 - 372	1.16198	0.99618	0.955955	0.967549	not	413.116	381 - 446	1.51482	0.921039	0.237326	0.325489	not	588.328	496 - 688	2.15339	1.15764	0.086459	0.208623	not	reliable
YIR009W	MSL1	275.564	256 - 295	251.658	224 - 282	0.91477	0.784242	0.00307762	0.0154001	not	299.723	248 - 362	1.08457	0.659439	0.00128464	0.00949792	repressed	462.391	454 - 472	1.68073	0.903544	0.0726357	0.187764	not	reliable
YLR345W	YLR345W	275.587	262 - 286	325.9	308 - 345	1.18332	1.01447	0.767569	0.819126	not	483.376	418 - 555	1.75322	1.06599	0.323684	0.416934	not	806.517	665 - 979	2.92541	1.57267	0.000400032	0.0226117	induced	reliable
YBR153W	RIB7	275.721	261 - 290	322.995	240 - 429	1.17457	1.00697	0.930015	0.947607	not	416.06	NA	1.51675	0.922211	0.16089	0.238218	not	389.619	NA	1.42018	0.763475	0.00185083	0.0376827	not	reliable
YOR070C	GYP1	276.601	259 - 295	372.863	323 - 432	1.35126	1.15845	0.0475256	0.091244	not	541.829	534 - 549	1.96984	1.1977	0.0135269	0.0372121	not	514.162	446 - 589	1.867	1.00368	0.951574	0.97308	not	reliable
YGR010W	NMA2	276.657	245 - 305	280.479	203 - 383	1.0187	0.87334	0.150852	0.223122	not	318.393	288 - 352	1.15756	0.703815	0.00172755	0.0109305	not	442.693	402 - 492	1.61133	0.866235	0.0502861	0.152333	not	reliable
YDR358W	GGA1	277.078	218 - 353	277.836	254 - 306	1.00274	0.85966	0.058996	0.107604	not	367.979	330 - 410	1.32575	0.806078	0.0237268	0.0545701	not	461.709	384 - 550	1.66176	0.893347	0.189879	0.343118	not	reliable
YOR130C	ORT1	277.313	265 - 287	299.245	275 - 323	1.08148	0.927162	0.150423	0.222721	not	370.139	325 - 415	1.33734	0.813125	0.0075555	0.0251064	not	531.446	476 - 597	1.919	1.03164	0.565514	0.699289	not	reliable
YPL159C	PET20	277.324	267 - 285	419.654	367 - 481	1.51667	1.30026	0.00295628	0.0151593	not	549.094	396 - 740	1.97655	1.20178	0.0561284	0.103678	not	704.181	642 - 770	2.54404	1.36765	0.0008418	0.0298386	not	reliable
YFL014W	HSP12	277.394	NA	208.452	NA	0.757881	0.64974	0.0152714	0.0403313	repressed	615.461	NA	2.18953	1.33127	0.167973	0.24696	not	949.784	NA	3.49993	1.88153	0.000638688	0.0269632	induced	reliable
YKL198C	PTK1	277.593	232 - 330	329.787	308 - 353	1.19837	1.02737	0.688085	0.751024	not	421.984	327 - 543	1.53249	0.931779	0.406136	0.49818	not	509.282	506 - 513	1.85395	0.996665	0.95856	0.976692	not	reliable
YNL172W	APC1	277.716	209 - 354	375.438	358 - 393	1.37366	1.17765	0.0835255	0.139976	not	559.309	465 - 674	2.03899	1.23974	0.0589988	0.107749	not	538.935	492 - 590	1.97106	1.05962	0.496539	0.641193	not	reliable
YBR214W	SDS24	277.924	221 - 351	230.092	224 - 235	0.827038	0.709028	0.00219219	0.0129584	not	351.852	315 - 390	1.26341	0.768175	0.01224	0.0348839	not	492.046	450 - 538	1.76953	0.951279	0.482916	0.630947	not	reliable
YBR145W	ADH5	277.927	251 - 303	308.661	284 - 335	1.11832	0.958744	0.453629	0.539925	not	373.016	352 - 392	1.35152	0.821745	0.0118142	0.0339894	not	510.626	377 - 659	1.84153	0.989986	0.902022	0.942864	not	reliable
YMR198W	CIK1	277.958	227 - 341	328.928	287 - 380	1.17904	1.0108	0.880965	0.907438	not	484.815	435 - 537	1.74134	1.05877	0.430875	0.521624	not	599.436	514 - 696	2.15253	1.15718	0.0871293	0.209614	not	reliable
YMR263W	SAP30	278.058	242 - 320	324.267	267 - 390	1.1609	0.995253	0.945298	0.959721	not	449.818	418 - 485	1.61663	0.982938	0.7742	0.824026	not	678.305	653 - 704	2.44086	1.31218	0.00207129	0.0394875	not	reliable
YFR038W	IRC5	278.238	276 - 278	459.672	416 - 507	1.65442	1.41835	0.000599272	0.00800039	not	613.528	531 - 702	2.20778	1.34237	0.00298238	0.0144297	not	490.713	414 - 580	1.76679	0.94981	0.406336	0.560409	not	reliable
YIR034C	LYS1	278.282	267 - 289	302.215	281 - 326	1.08893	0.933548	0.227148	0.309354	not	426.533	360 - 502	1.53908	0.935788	0.279953	0.3716	not	479.617	411 - 553	1.72915	0.929572	0.246916	0.405269	not	reliable
YFR045W	YFR045W	279.039	268 - 287	277.887	276 - 279	0.997616	0.855267	0.0135266	0.0368705	not	406.087	360 - 456	1.45603	0.885291	0.0751388	0.130461	not	408.052	334 - 490	1.46254	0.786249	0.00779471	0.0641692	not	reliable
YPL007C	TFC8	279.151	265 - 292	320.894	266 - 389	1.15473	0.989959	0.870399	0.899578	not	553.273	514 - 600	1.99188	1.2111	0.0103941	0.0309906	not	483.551	302 - 771	1.7163	0.922665	0.502438	0.647185	not	reliable
YNL299W	TRF5	279.207	253 - 303	390.984	380 - 402	1.40875	1.20773	0.0113288	0.0329165	not	472.303	448 - 498	1.703	1.03545	0.535294	0.617378	not	468.459	350 - 629	1.67914	0.90269	0.260809	0.419317	not	reliable
YGL045W	RIM8	279.348	177 - 444	247.188	237 - 259	0.887518	0.760879	0.0415008	0.0823898	not	379.321	352 - 408	1.36079	0.827384	0.129086	0.199565	not	452.51	428 - 475	1.62488	0.873522	0.241234	0.400123	not	reliable
YLR114C	AVL9	279.93	279 - 279	555.61	376 - 788	1.96468	1.68434	0.00178551	0.0116615	induced	782.65	613 - 988	2.79797	1.70121	0.000287252	0.0060363	induced	614.223	548 - 694	2.19866	1.18198	0.021707	0.0962186	not	reliable
YEL048C	TCA17	279.975	273 - 286	212.227	206 - 219	0.760912	0.652338	0.000121845	0.00626999	repressed	264.426	250 - 278	0.948381	0.576631	4.15067e-05	0.0060363	repressed	463.676	416 - 524	1.66155	0.893231	0.078986	0.196717	not	reliable
YGL194C	HOS2	280.297	263 - 299	233.872	165 - 318	0.825728	0.707905	0.00989169	0.0301929	not	322.426	322 - 322	1.15213	0.700517	0.000418642	0.0065591	not	479.103	423 - 543	1.71083	0.919727	0.169234	0.318743	not	reliable
YPL104W	MSD1	280.777	276 - 284	405.894	366 - 451	1.44969	1.24284	0.00509375	0.0202304	not	674.527	613 - 735	2.40889	1.46465	0.000330015	0.00618068	not	481.571	422 - 550	1.71834	0.923763	0.184853	0.336724	not	reliable
YOR033C	EXO1	280.889	263 - 296	407.648	379 - 438	1.45713	1.24922	0.00555361	0.0212525	not	625.878	558 - 707	2.24019	1.36207	0.00156693	0.0104021	not	667.246	634 - 702	2.3884	1.28398	0.00305016	0.0462512	not	reliable
YHR034C	PIH1	281.001	243 - 320	299.745	257 - 356	1.07654	0.922932	0.263484	0.348356	not	416.427	406 - 426	1.49545	0.90926	0.169076	0.24813	not	551.286	495 - 619	1.97858	1.06367	0.374406	0.530073	not	reliable
YPL016W	SWI1	281.345	259 - 302	560.174	550 - 569	2.0025	1.71676	6.41561e-05	0.00626999	induced	769.429	748 - 790	2.75191	1.6732	0.000100463	0.0060363	induced	573.375	484 - 682	2.04795	1.10096	0.163738	0.31224	not	reliable
YGR174C	CBP4	281.399	230 - 342	284.212	193 - 396	0.994604	0.852685	0.188728	0.267464	not	470.244	452 - 489	1.67008	1.01544	0.812843	0.854067	not	575.862	517 - 655	2.04485	1.09929	0.186183	0.33861	not	reliable
YLR368W	MDM30	281.488	247 - 320	357.539	290 - 444	1.26977	1.08859	0.246362	0.330512	not	528.646	521 - 536	1.87875	1.14231	0.0463902	0.0896729	not	659.773	598 - 723	2.34445	1.26035	0.00534371	0.0561785	not	reliable
YIL061C	SNP1	282.682	248 - 315	299.622	266 - 333	1.06526	0.913257	0.195923	0.275178	not	391.066	375 - 409	1.3946	0.84794	0.0283072	0.0622296	not	449.475	NA	1.60215	0.861299	0.0447094	0.141715	not	reliable
YML049C	RSE1	282.836	257 - 310	383.38	331 - 450	1.35177	1.15889	0.0500767	0.0949811	not	505.96	426 - 599	1.7855	1.08561	0.250341	0.339803	not	498.205	468 - 531	1.76344	0.948008	0.317903	0.476433	not	reliable
YGL128C	CWC23	282.867	190 - 415	274.376	255 - 297	0.971457	0.83284	0.0938544	0.153733	not	344.289	267 - 433	1.21105	0.736339	0.0347181	0.0722197	not	456.198	413 - 503	1.61436	0.867863	0.174414	0.324074	not	reliable
YOR112W	CEX1	283.114	231 - 345	483.556	481 - 485	1.70735	1.46373	0.000820713	0.00907192	not	604.198	529 - 694	2.13336	1.29712	0.00777323	0.025591	not	532.798	447 - 622	1.87866	1.00995	0.89091	0.935919	not	reliable
YDR240C	SNU56	283.116	248 - 315	257.497	251 - 265	0.91577	0.785099	0.00620464	0.0226995	not	372.397	327 - 426	1.32571	0.806057	0.0137967	0.0375886	not	489.597	427 - 561	1.74145	0.936184	0.33946	0.498479	not	reliable
YNL094W	APP1	283.128	246 - 323	352.121	336 - 369	1.25287	1.0741	0.260718	0.34547	not	469.491	433 - 510	1.67026	1.01554	0.815499	0.85638	not	428.47	426 - 431	1.52647	0.820614	0.0140292	0.079668	not	reliable
YPR084W	YPR084W	283.495	260 - 304	279.396	246 - 319	0.991943	0.850404	0.0289412	0.0632747	not	340.979	330 - 353	1.21058	0.736054	0.00139633	0.0099497	not	421.757	344 - 536	1.49257	0.802389	0.0226166	0.0985514	not	reliable
YBR255W	MTC4	284.095	254 - 317	406.412	400 - 412	1.4315	1.22724	0.00581158	0.0218644	not	509.474	464 - 559	1.79267	1.08998	0.17525	0.255797	not	556.184	538 - 573	1.95956	1.05344	0.32926	0.487035	not	reliable
YER137C	YER137C	284.117	258 - 314	371.687	301 - 456	1.30275	1.11686	0.143974	0.215087	not	432.084	376 - 493	1.51868	0.923382	0.244823	0.333828	not	554.985	495 - 616	1.95431	1.05062	0.390387	0.545866	not	reliable
YHR194W	MDM31	284.162	268 - 301	366.265	348 - 385	1.28997	1.10591	0.0727905	0.126251	not	568.428	543 - 595	2.00307	1.2179	0.0080791	0.0262617	not	624.048	619 - 628	2.20025	1.18283	0.0119817	0.0755502	not	reliable
YNL311C	SKP2	284.319	267 - 298	339.707	233 - 479	1.19609	1.02542	0.784924	0.832464	not	445.603	433 - 460	1.5758	0.958114	0.424664	0.51565	not	519.223	433 - 608	1.83309	0.985453	0.817058	0.887342	not	reliable
YDL033C	SLM3	284.896	244 - 333	302.581	280 - 328	1.06249	0.910885	0.129575	0.197169	not	411.81	406 - 415	1.44596	0.879169	0.0558222	0.103231	not	474.772	430 - 523	1.66627	0.895773	0.100766	0.229072	not	reliable
YMR056C	AAC1	284.907	247 - 327	329.134	294 - 371	1.15581	0.990886	0.872483	0.90097	not	483.144	463 - 506	1.69666	1.0316	0.57749	0.657068	not	581.469	579 - 584	2.04196	1.09774	0.122498	0.2593	not	reliable
YIL156W	UBP7	285.008	267 - 304	372.52	339 - 413	1.30635	1.11995	0.0692331	0.121459	not	501.647	462 - 545	1.76311	1.072	0.206622	0.292309	not	441.531	324 - 607	1.54235	0.829149	0.0635692	0.173192	not	reliable
YJL059W	YHC3	285.487	277 - 294	369.719	315 - 434	1.29347	1.10891	0.121159	0.187182	not	497.981	472 - 523	1.74773	1.06265	0.264447	0.355699	not	623.478	559 - 692	2.18735	1.1759	0.0245314	0.102249	not	reliable
YKL011C	CCE1	285.521	284 - 286	268.812	216 - 340	0.943739	0.809078	0.0157085	0.0410191	not	365.553	320 - 416	1.28161	0.779241	0.00609476	0.0219567	not	490.762	470 - 511	1.7244	0.92702	0.152222	0.298015	not	reliable
YHL026C	YHL026C	285.563	217 - 374	380.941	346 - 416	1.3343	1.14391	0.128252	0.195682	not	502.146	442 - 564	1.75523	1.06721	0.45305	0.542433	not	584.581	549 - 616	2.04695	1.10042	0.248493	0.407266	not	reliable
YOL071W	EMI5	285.653	227 - 354	302.882	297 - 307	1.05988	0.908648	0.173708	0.250233	not	452.297	376 - 537	1.58192	0.961832	0.603535	0.67995	not	558.828	366 - 826	1.9322	1.03873	0.749693	0.841656	not	reliable
YBR043C	QDR3	285.667	257 - 313	398.123	376 - 420	1.40229	1.2022	0.0155022	0.0406492	not	455.624	435 - 477	1.60669	0.976894	0.682022	0.750196	not	461.198	427 - 498	1.62557	0.873889	0.0567174	0.162066	not	reliable
YDR362C	TFC6	285.922	279 - 293	395.803	355 - 440	1.38809	1.19003	0.0132951	0.0364858	not	484.684	415 - 568	1.69868	1.03283	0.573704	0.653543	not	490.78	487 - 496	1.72123	0.925315	0.137457	0.278631	not	reliable
YPL056C	LCL1	286.078	260 - 309	337.893	318 - 357	1.18722	1.01782	0.752414	0.805232	not	416.028	341 - 505	1.46244	0.889185	0.116541	0.184071	not	547.625	443 - 674	1.92166	1.03307	0.656682	0.773921	not	reliable
YOR084W	LPX1	286.101	255 - 315	414.75	345 - 501	1.45955	1.25129	0.0163548	0.0421425	not	508.038	460 - 565	1.78873	1.08758	0.198622	0.283046	not	571.006	536 - 609	2.01031	1.08072	0.213613	0.370613	not	reliable
YLR364W	GRX8	286.535	255 - 315	307.053	280 - 337	1.07686	0.923205	0.233643	0.316447	not	422.615	357 - 489	1.48166	0.900877	0.183673	0.265624	not	677.039	611 - 750	2.3798	1.27935	0.00563536	0.0566306	not	reliable
YMR192W	GYL1	286.745	272 - 303	343.149	262 - 446	1.1897	1.01994	0.798559	0.843445	not	553.067	414 - 723	1.91971	1.16721	0.102675	0.166382	not	679.542	658 - 704	2.37478	1.27666	0.00204226	0.0394875	not	reliable
YDR479C	PEX29	286.869	273 - 297	310.921	290 - 332	1.089	0.933608	0.19545	0.27465	not	446.959	423 - 476	1.56558	0.951901	0.352188	0.44524	not	522.809	470 - 587	1.82959	0.983568	0.765934	0.853452	not	reliable
YNL188W	KAR1	286.992	251 - 321	297.311	296 - 298	1.04411	0.89513	0.0986511	0.159681	not	365.77	NA	1.28201	0.779485	0.0129203	0.0361859	not	527.793	527 - 529	1.85497	0.997215	0.962206	0.97794	not	reliable
YDR515W	SLF1	287.014	248 - 329	289.149	201 - 385	1.00411	0.860836	0.182674	0.260516	not	369.5	300 - 451	1.29327	0.786332	0.0262805	0.0589618	not	471.668	456 - 488	1.65878	0.891743	0.104475	0.234396	not	reliable
YKR010C	TOF2	287.213	280 - 294	376.756	362 - 392	1.31424	1.12671	0.0393007	0.0792294	not	580.295	405 - 840	2.01279	1.22381	0.0654485	0.116775	not	495.172	398 - 596	1.72468	0.927171	0.272129	0.430298	not	reliable
YBR238C	YBR238C	287.258	283 - 289	400.906	349 - 469	1.40059	1.20075	0.0167927	0.0427483	not	587.533	577 - 599	2.05253	1.24797	0.00425336	0.0175855	not	577.743	551 - 604	2.01869	1.08523	0.130943	0.2701	not	reliable
YLR072W	YLR072W	287.281	278 - 294	425.903	418 - 435	1.48795	1.27563	0.00223086	0.0130619	not	510.678	455 - 577	1.78204	1.08351	0.210774	0.297069	not	659.792	621 - 696	2.30649	1.23995	0.00438129	0.0514808	not	reliable
YMR127C	SAS2	287.726	275 - 296	294.826	273 - 321	1.0274	0.880799	0.0504159	0.095435	not	376.176	333 - 422	1.31094	0.797072	0.00941904	0.029048	not	435.284	398 - 477	1.51941	0.81682	0.00815043	0.0652429	not	reliable
YDR108W	TRS85	288.06	277 - 299	386.512	341 - 436	1.34517	1.15323	0.0322142	0.0680626	not	521.971	482 - 565	1.81486	1.10346	0.105015	0.168872	not	511.119	491 - 532	1.77877	0.956249	0.367092	0.523286	not	reliable
YOL110W	SHR5	288.393	262 - 321	255.378	240 - 270	0.886376	0.759899	0.00148024	0.0109521	not	382.934	323 - 458	1.32435	0.805226	0.0198585	0.0479987	not	431.666	307 - 609	1.48777	0.799812	0.0441428	0.140946	not	reliable
YDR231C	COX20	288.55	284 - 291	276.06	239 - 317	0.960392	0.823354	0.0103278	0.0309908	not	425.056	306 - 599	1.46402	0.890151	0.257348	0.34763	not	485.848	478 - 494	1.69037	0.908727	0.0844847	0.205437	not	reliable
YOL053W	AIM39	288.584	276 - 298	275.877	263 - 290	0.960402	0.823363	0.00675322	0.0239524	not	448.296	441 - 455	1.56059	0.948863	0.323467	0.416845	not	543.177	500 - 592	1.89017	1.01614	0.762892	0.851237	not	reliable
YDL025C	RTK1	288.729	247 - 331	394.068	344 - 452	1.37737	1.18083	0.0447756	0.087569	not	567.926	525 - 607	1.98351	1.206	0.0270031	0.0601298	not	546.26	497 - 599	1.90857	1.02603	0.690998	0.799895	not	reliable
YBL075C	SSA3	289.038	222 - 369	450.631	422 - 481	1.55684	1.3347	0.00674493	0.0239481	not	565.849	459 - 695	1.94861	1.18479	0.0995469	0.162681	not	510.471	451 - 572	1.76448	0.948566	0.49027	0.636797	not	reliable
YBR131W	CCZ1	289.119	258 - 318	384.122	316 - 465	1.33225	1.14216	0.108879	0.172402	not	491.19	478 - 505	1.71167	1.04073	0.511066	0.596244	not	516.696	507 - 526	1.80133	0.968375	0.579241	0.710361	not	reliable
YKR022C	NTR2	289.153	249 - 330	303.074	301 - 304	1.05703	0.906203	0.139171	0.208849	not	433.34	406 - 461	1.51095	0.91868	0.224602	0.311666	not	579.646	541 - 613	2.02231	1.08718	0.215028	0.372154	not	reliable
YDR249C	YDR249C	289.419	282 - 293	297.769	280 - 316	1.03305	0.885649	0.0397216	0.0796403	not	433.29	415 - 453	1.50248	0.913535	0.121094	0.189515	not	540.206	450 - 645	1.87054	1.00558	0.929598	0.958229	not	reliable
YDR192C	NUP42	289.73	270 - 310	319.61	275 - 372	1.10492	0.947263	0.345631	0.434807	not	316.603	NA	1.09254	0.664281	0.000508105	0.00693697	repressed	448.126	345 - 568	1.54356	0.8298	0.0367915	0.127034	not	reliable
YNL027W	CRZ1	290.063	254 - 334	325.169	231 - 450	1.1078	0.949733	0.600102	0.675592	not	472.435	437 - 516	1.62744	0.989509	0.86178	0.89054	not	605.549	589 - 622	2.08857	1.12279	0.0700717	0.183569	not	reliable
YLL003W	SFI1	290.086	258 - 327	389.265	373 - 407	1.34292	1.1513	0.0305114	0.0656168	not	542.999	513 - 574	1.87207	1.13825	0.0534199	0.0999812	not	656.117	654 - 659	2.26367	1.21693	0.00810364	0.065198	not	reliable
YKL121W	DGR2	291.055	279 - 302	327.809	304 - 352	1.12902	0.967922	0.497785	0.581455	not	485.351	463 - 509	1.67049	1.01569	0.762446	0.814274	not	504.925	457 - 559	1.73782	0.934234	0.224593	0.38262	not	reliable
YJR102C	VPS25	291.111	289 - 291	318.344	294 - 345	1.09538	0.939081	0.246045	0.33024	not	382.634	376 - 389	1.31869	0.801784	0.00430096	0.0177305	not	579.593	548 - 611	1.99789	1.07404	0.176109	0.326113	not	reliable
YBR136W	MEC1	291.156	280 - 297	414.403	388 - 440	1.42786	1.22412	0.00691072	0.0242626	not	498.163	399 - 616	1.71136	1.04054	0.591984	0.669792	not	503.004	379 - 652	1.72642	0.928104	0.370683	0.526515	not	reliable
YMR059W	SEN15	291.257	257 - 325	338.21	316 - 361	1.16814	1.00146	0.979989	0.984864	not	489.217	430 - 554	1.692	1.02877	0.648182	0.721108	not	588.248	NA	2.03517	1.09409	0.147784	0.292466	not	reliable
YBL104C	YBL104C	291.624	272 - 309	366.288	324 - 414	1.26315	1.08292	0.192296	0.271499	not	566.707	513 - 625	1.95416	1.18816	0.019154	0.0468374	not	528.97	464 - 600	1.8221	0.979541	0.728022	0.826017	not	reliable
YDR490C	PKH1	291.711	242 - 348	407.328	367 - 454	1.39646	1.1972	0.026957	0.0602405	not	663.184	607 - 716	2.27363	1.3824	0.00192311	0.0113402	not	509.299	492 - 526	1.74604	0.938653	0.310197	0.46911	not	reliable
YDR265W	PEX10	291.98	289 - 292	375.921	352 - 400	1.29242	1.10801	0.0702769	0.122802	not	511.318	400 - 647	1.75375	1.06631	0.376009	0.469783	not	637.564	577 - 696	2.1911	1.17791	0.016171	0.0843759	not	reliable
YDL211C	YDL211C	292.302	271 - 312	319.219	304 - 336	1.09386	0.937781	0.204143	0.284393	not	429.644	421 - 439	1.4724	0.895241	0.0596246	0.108681	not	530.764	399 - 700	1.81009	0.973084	0.725561	0.824903	not	reliable
YKR045C	YKR045C	292.448	282 - 301	308.711	304 - 312	1.05984	0.908615	0.0875188	0.145633	not	473.676	399 - 558	1.62635	0.988846	0.848451	0.879875	not	588.192	511 - 672	2.01879	1.08528	0.183269	0.33546	not	reliable
YIR024C	YIR024C	292.535	235 - 365	276.846	237 - 321	0.941856	0.807463	0.0283137	0.0623364	not	488.598	455 - 522	1.67026	1.01555	0.810232	0.852432	not	695.627	661 - 730	2.37746	1.2781	0.00794786	0.0645151	not	reliable
YDR197W	CBS2	292.714	272 - 319	323.18	284 - 368	1.10568	0.947912	0.338113	0.427058	not	376.44	NA	1.26333	0.768127	0.0774204	0.133666	not	542.572	513 - 576	1.85593	0.997729	0.963795	0.9785	not	reliable
YGL098W	USE1	293.449	248 - 348	261.217	240 - 289	0.888125	0.761399	0.00462127	0.0189682	not	404.817	403 - 406	1.37961	0.838827	0.0218369	0.0515483	not	506.708	385 - 664	1.71848	0.923839	0.362769	0.52026	not	reliable
YCR024C	SLM5	293.695	293 - 293	311.307	244 - 384	1.05698	0.906161	0.205313	0.28553	not	458.652	435 - 482	1.56762	0.953138	0.348379	0.442197	not	548.701	466 - 635	1.87242	1.00659	0.91062	0.947822	not	reliable
YIL105C	SLM1	294.143	205 - 399	406.963	407 - 407	1.41252	1.21097	0.0838261	0.140395	not	590.947	544 - 639	2.0519	1.24759	0.0577247	0.105935	not	501.221	NA	1.73901	0.934876	0.500545	0.645631	not	reliable
YGR263C	SAY1	294.253	263 - 324	348.25	342 - 354	1.19175	1.0217	0.693702	0.755988	not	496.41	471 - 521	1.69941	1.03327	0.570271	0.650556	not	440.177	422 - 461	1.50674	0.810008	0.00853877	0.0656735	not	reliable
YMR087W	YMR087W	294.485	280 - 309	339.084	323 - 356	1.15409	0.989416	0.817559	0.857805	not	430.647	409 - 452	1.4649	0.890684	0.0593042	0.108167	not	485.211	465 - 504	1.65148	0.887818	0.0423148	0.137468	not	reliable
YLR006C	SSK1	294.586	286 - 300	404.177	400 - 408	1.37753	1.18097	0.0122747	0.0347475	not	540.894	491 - 600	1.84429	1.12136	0.0680428	0.120341	not	601.759	NA	2.04965	1.10187	0.128849	0.267428	not	reliable
YMR132C	JLP2	294.631	275 - 312	296.978	280 - 316	1.01214	0.867715	0.0350103	0.0727742	not	421.479	390 - 452	1.43737	0.873946	0.051577	0.0973048	not	537.674	524 - 552	1.83544	0.986712	0.796391	0.875829	not	reliable
YLR327C	TMA10	294.788	243 - 354	208.052	147 - 295	0.703428	0.603056	0.00391647	0.0172654	repressed	668.056	320 - 1370	2.21081	1.34421	0.133343	0.204998	not	1173.48	921 - 1480	4.00954	2.15549	0.00011526	0.0151607	induced	reliable
YGR129W	SYF2	294.931	284 - 305	287.27	255 - 319	0.973886	0.834923	0.0153272	0.0404529	not	416.311	372 - 457	1.41528	0.860512	0.0229737	0.0534405	not	458.676	NA	1.55907	0.838138	0.0100418	0.0702348	not	reliable
YBL031W	SHE1	295.41	294 - 294	264.051	238 - 291	0.897228	0.769203	0.00189913	0.0120285	not	382.652	348 - 415	1.30019	0.790537	0.00332618	0.0153354	not	529.005	503 - 559	1.7972	0.966158	0.489592	0.63629	not	reliable
YLR425W	TUS1	295.511	269 - 317	417.253	379 - 458	1.42104	1.21827	0.0114709	0.0331937	not	599.425	496 - 724	2.03357	1.23644	0.0250968	0.0568928	not	644.93	536 - 766	2.19308	1.17898	0.0352341	0.123549	not	reliable
YKL155C	RSM22	295.612	252 - 338	346.249	338 - 354	1.18169	1.01308	0.834456	0.871112	not	485.117	479 - 490	1.65692	1.00743	0.907151	0.927652	not	577.184	532 - 623	1.97075	1.05945	0.391975	0.54741	not	reliable
YHR195W	NVJ1	295.988	245 - 363	368.065	334 - 404	1.24364	1.06618	0.324733	0.413371	not	538.115	533 - 545	1.81789	1.10531	0.142981	0.216287	not	677.133	628 - 731	2.28682	1.22937	0.0157598	0.0843379	not	reliable
YHR155W	YSP1	296.234	288 - 303	439.804	413 - 470	1.48912	1.27664	0.00213645	0.0128215	not	634.575	602 - 671	2.14686	1.30533	0.00220512	0.0121089	not	563.571	560 - 567	1.90824	1.02585	0.59137	0.718593	not	reliable
YDL156W	YDL156W	296.256	293 - 296	224.155	168 - 287	0.752295	0.644951	0.00186891	0.0119442	repressed	346.401	285 - 423	1.17201	0.712602	0.001462	0.0100231	not	418.08	NA	1.40786	0.756853	0.0142505	0.080601	not	reliable
YDR026C	YDR026C	296.388	238 - 367	429.556	420 - 439	1.4482	1.24156	0.012887	0.0356709	not	536.156	474 - 600	1.80528	1.09764	0.231496	0.319012	not	595.667	587 - 602	2.0097	1.08039	0.251388	0.410159	not	reliable
YKL075C	YKL075C	296.624	281 - 312	315.816	289 - 344	1.06715	0.914876	0.106263	0.168874	not	431.031	407 - 456	1.45541	0.884912	0.0506925	0.0961168	not	550.687	468 - 638	1.85777	0.998718	0.982808	0.988752	not	reliable
YOL126C	MDH2	296.879	252 - 349	524.999	357 - 756	1.75821	1.50734	0.00725615	0.0248403	induced	620.566	357 - 1080	2.05437	1.24909	0.144808	0.218292	not	1323.78	1120 - 1540	4.45311	2.39395	1.58913e-05	0.00789987	induced	reliable
YDL248W	COS7	297.058	282 - 309	276.661	275 - 278	0.933147	0.799997	0.00276558	0.0146188	not	385.242	313 - 471	1.2945	0.787078	0.0136847	0.0374098	not	566.585	481 - 671	1.90843	1.02595	0.668727	0.782441	not	reliable
YLR246W	ERF2	297.192	283 - 311	346.3	311 - 386	1.16853	1.00179	0.974625	0.981567	not	507.468	490 - 523	1.71673	1.0438	0.421637	0.512526	not	677.058	639 - 721	2.29006	1.23111	0.00643369	0.0592486	not	reliable
YAL015C	NTG1	297.215	276 - 314	352.338	319 - 391	1.18958	1.01984	0.733991	0.790452	not	529.219	393 - 720	1.78468	1.08512	0.332385	0.426104	not	667.16	587 - 749	2.25657	1.21311	0.0131794	0.0783837	not	reliable
YJR062C	NTA1	297.523	220 - 402	256.011	241 - 270	0.860761	0.737939	0.00926291	0.0289453	not	388.523	380 - 396	1.30605	0.7941	0.0295356	0.0639561	not	482.154	468 - 498	1.62126	0.871576	0.131237	0.270311	not	reliable
YGR089W	NNF2	297.546	216 - 401	339.476	290 - 394	1.14111	0.978285	0.792799	0.839399	not	546.647	547 - 547	1.83755	1.11726	0.1984	0.282835	not	546.314	529 - 566	1.83658	0.987329	0.871043	0.925882	not	reliable
YBL112C	YBL112C	297.77	259 - 344	235.677	157 - 351	0.787201	0.674876	0.00794403	0.0263219	not	283.763	232 - 341	0.948952	0.576979	0.000443161	0.00663101	repressed	459.795	308 - 673	1.53021	0.822623	0.0920182	0.216217	not	reliable
YGR169C	PUS6	297.815	265 - 334	352.352	299 - 409	1.18393	1.01499	0.800504	0.845026	not	501.949	414 - 614	1.68473	1.02435	0.712758	0.774368	not	553.615	453 - 688	1.85557	0.997538	0.970973	0.981384	not	reliable
YMR282C	AEP2	298.027	286 - 308	350.728	334 - 369	1.18083	1.01234	0.807481	0.85112	not	528.025	439 - 628	1.77402	1.07864	0.294488	0.387264	not	498.826	466 - 537	1.68124	0.90382	0.0910101	0.215126	not	reliable
YMR048W	CSM3	298.072	278 - 316	343.737	290 - 412	1.15964	0.994168	0.92492	0.943095	not	426.329	366 - 494	1.43424	0.872043	0.087069	0.146261	not	532.635	431 - 670	1.7917	0.963199	0.605719	0.731537	not	reliable
YOR166C	SWT1	298.151	258 - 338	335.242	292 - 386	1.12949	0.968327	0.643526	0.712984	not	411.775	357 - 482	1.38861	0.844296	0.0548742	0.101827	not	440.3	319 - 605	1.47954	0.795385	0.0443649	0.141129	not	reliable
YDR376W	ARH1	298.473	285 - 309	316.492	291 - 344	1.0659	0.913811	0.119635	0.185283	not	502.397	453 - 558	1.68906	1.02698	0.659443	0.730524	not	543.257	492 - 597	1.82851	0.982989	0.755769	0.846126	not	reliable
YJL137C	GLG2	299.176	225 - 372	332.271	328 - 336	1.12662	0.965862	0.657178	0.724441	not	500.208	476 - 525	1.69718	1.03192	0.692939	0.757931	not	544.981	446 - 667	1.8442	0.991425	0.923164	0.954685	not	reliable
YGL010W	YGL010W	299.642	288 - 311	265.494	265 - 265	0.887762	0.761088	0.00106408	0.00989871	not	435.968	382 - 499	1.4581	0.886551	0.0614836	0.111352	not	517.903	492 - 543	1.73258	0.931418	0.174612	0.32423	not	reliable
YIL112W	HOS4	299.843	268 - 333	376.823	353 - 401	1.26437	1.08396	0.197837	0.277089	not	496.495	415 - 587	1.66683	1.01346	0.841384	0.874149	not	480.944	NA	1.61522	0.868325	0.0531474	0.156645	not	reliable
YBL014C	RRN6	299.955	245 - 354	342.363	NA	1.15394	0.989286	0.872843	0.90104	not	544.873	NA	1.8366	1.11669	0.156682	0.233148	not	469.821	NA	1.58432	0.851713	0.0527875	0.155909	not	reliable
YMR233W	TRI1	300.067	227 - 389	317.826	304 - 333	1.07653	0.922923	0.347928	0.437113	not	411.842	371 - 456	1.39318	0.847075	0.0986139	0.161342	not	625.255	599 - 654	2.11821	1.13873	0.151142	0.296674	not	reliable
YIL107C	PFK26	300.398	270 - 333	377.721	309 - 455	1.25766	1.0782	0.277494	0.362221	not	593.789	551 - 643	1.97647	1.20173	0.0164344	0.0421747	not	740.018	732 - 749	2.466	1.3257	0.00134438	0.0335026	not	reliable
YAL024C	LTE1	300.488	285 - 313	373.335	317 - 437	1.24492	1.06728	0.280364	0.365041	not	509.107	499 - 518	1.69769	1.03222	0.527913	0.610484	not	517.986	435 - 606	1.72508	0.927384	0.236097	0.395313	not	reliable
YFR007W	YFH7	301.124	269 - 330	337.648	259 - 450	1.12752	0.966639	0.66591	0.731337	not	473.957	401 - 561	1.58004	0.960689	0.58887	0.667331	not	514.857	489 - 543	1.72217	0.925819	0.207504	0.363357	not	reliable
YNR048W	YNR048W	301.256	269 - 335	349.992	314 - 388	1.16296	0.997015	0.955413	0.967212	not	523.075	492 - 558	1.73667	1.05592	0.343328	0.43716	not	555.521	509 - 604	1.8452	0.991964	0.878493	0.928831	not	reliable
YFR021W	ATG18	301.592	263 - 347	407.456	384 - 430	1.36095	1.16675	0.0386945	0.0782468	not	530.622	493 - 569	1.77458	1.07898	0.244399	0.33333	not	579.046	521 - 637	1.93509	1.04029	0.545067	0.681893	not	reliable
YKR046C	PET10	302.068	261 - 346	319.585	258 - 387	1.05795	0.906993	0.174	0.250419	not	507.819	508 - 508	1.68186	1.0226	0.684629	0.752187	not	667.2	643 - 691	2.20992	1.18803	0.016461	0.0848346	not	reliable
YDR281C	PHM6	302.096	179 - 483	465.326	434 - 496	1.59187	1.36473	0.049266	0.0938527	not	563.946	530 - 602	1.93229	1.17486	0.242738	0.331464	not	402.027	305 - 517	1.37101	0.737043	0.067583	0.179477	not	reliable
YML097C	VPS9	302.158	NA	285.584	NA	0.946673	0.811593	0.00573877	0.0216679	not	401.189	NA	1.32892	0.808005	0.00980325	0.0297431	not	510.452	NA	1.68894	0.907959	0.149842	0.294969	not	reliable
YOR141C	ARP8	302.158	279 - 326	450.446	427 - 476	1.49305	1.28001	0.0021506	0.0128319	not	741.61	710 - 777	2.45827	1.49467	0.000245528	0.0060363	not	606.769	606 - 609	2.01129	1.08125	0.14614	0.290442	not	reliable
YLR042C	YLR042C	302.158	277 - 325	232.327	226 - 238	0.769785	0.659945	0.000142028	0.00626999	repressed	333.484	326 - 341	1.10478	0.671726	0.000291858	0.0060363	not	647.398	542 - 763	2.14277	1.15193	0.047228	0.14677	not	reliable
YPL189C-A	COA2	302.248	297 - 306	231.392	210 - 257	0.767996	0.658411	0.000168716	0.00626999	repressed	363.362	NA	1.20467	0.732457	0.00120294	0.00918195	not	650.074	NA	2.14824	1.15487	0.0964216	0.222687	not	reliable
YPL175W	SPT14	302.315	293 - 310	319.027	296 - 341	1.06016	0.90889	0.0905132	0.149429	not	449.618	442 - 459	1.49399	0.908368	0.0970689	0.159599	not	645.647	630 - 668	2.14539	1.15334	0.0267685	0.106575	not	reliable
YGR278W	CWC22	302.405	274 - 333	350.469	350 - 350	1.16658	1.00012	0.998146	0.998499	not	478.292	473 - 482	1.59272	0.968399	0.573487	0.653543	not	561.109	558 - 563	1.86878	1.00464	0.932632	0.960221	not	reliable
YJL155C	FBP26	302.438	267 - 339	275.201	263 - 288	0.917307	0.786417	0.00561782	0.0214113	not	445.418	416 - 474	1.48332	0.901881	0.141782	0.215084	not	700.517	677 - 724	2.33523	1.25539	0.00714195	0.0619553	not	reliable
YDL030W	PRP9	302.561	238 - 367	352.694	312 - 397	1.18063	1.01216	0.870343	0.899578	not	459.187	453 - 465	1.53646	0.934196	0.371829	0.465589	not	509.837	427 - 600	1.70365	0.915864	0.295448	0.454956	not	reliable
YBR251W	MRPS5	302.629	229 - 384	289.889	253 - 325	0.969984	0.831578	0.0692994	0.1215	not	468.424	394 - 551	1.57083	0.955093	0.603659	0.67995	not	536.534	421 - 684	1.79371	0.964278	0.711482	0.81411	not	reliable
YNL127W	FAR11	303.228	280 - 324	407.597	405 - 410	1.35176	1.15888	0.0256909	0.0582396	not	548.687	501 - 599	1.81834	1.10558	0.128874	0.199319	not	533.296	473 - 597	1.76788	0.950393	0.397366	0.552896	not	reliable
YER144C	UBP5	303.262	277 - 330	435.025	381 - 495	1.44457	1.23844	0.0112656	0.0328276	not	626.93	604 - 649	2.08073	1.26512	0.00650289	0.0229304	not	555.547	550 - 562	1.84494	0.991819	0.880641	0.929276	not	reliable
YDR371W	CTS2	303.517	292 - 313	261.932	212 - 316	0.86487	0.741463	0.00269832	0.0143978	not	331.523	212 - 484	1.07878	0.655917	0.00968127	0.0295028	repressed	559.897	526 - 592	1.84954	0.994292	0.906451	0.945746	not	reliable
YKL189W	HYM1	303.607	294 - 312	314.733	291 - 334	1.03983	0.891459	0.0617223	0.111143	not	404.133	350 - 472	1.33653	0.812635	0.0115117	0.0333844	not	574.748	494 - 655	1.89918	1.02098	0.733757	0.82986	not	reliable
YOL060C	MAM3	303.764	261 - 351	417.029	402 - 433	1.38571	1.18799	0.028035	0.0619156	not	602.726	504 - 723	2.00086	1.21655	0.0319748	0.0680574	not	483.95	435 - 536	1.60704	0.863929	0.0618455	0.169888	not	reliable
YPL150W	YPL150W	304.097	279 - 328	439.078	384 - 498	1.453	1.24567	0.00899485	0.0285013	not	744.734	606 - 917	2.45507	1.49272	0.00160741	0.0105739	not	588.211	535 - 658	1.94575	1.04602	0.434785	0.587328	not	reliable
YLR362W	STE11	304.108	277 - 330	353.171	351 - 356	1.16855	1.00181	0.972598	0.980422	not	471.397	396 - 562	1.55496	0.945445	0.450223	0.539848	not	615.925	509 - 745	2.03471	1.09384	0.211774	0.368892	not	reliable
YOR337W	TEA1	304.232	249 - 356	535.233	425 - 683	1.76719	1.51503	0.00270729	0.0144321	induced	725.777	513 - 1030	2.38673	1.45117	0.0126475	0.0356425	not	558.791	399 - 771	1.84208	0.990284	0.924563	0.955303	not	reliable
YBR194W	AIM4	304.42	303 - 304	317.227	285 - 350	1.04352	0.894623	0.0720096	0.12528	not	436.485	426 - 446	1.43857	0.874674	0.0341623	0.0714051	not	596.235	546 - 652	1.96511	1.05642	0.298969	0.458258	not	reliable
YFR043C	IRC6	304.787	291 - 318	314.523	272 - 367	1.03435	0.886764	0.0615888	0.111044	not	450.822	445 - 455	1.48223	0.901218	0.0743452	0.129463	not	640.128	578 - 710	2.10374	1.13095	0.0565046	0.161965	not	reliable
YHR198C	AIM18	305.678	299 - 310	357.192	328 - 389	1.16976	1.00285	0.955271	0.967212	not	518.643	499 - 540	1.70196	1.03482	0.489823	0.577535	not	536.39	485 - 587	1.75914	0.945698	0.300833	0.460491	not	reliable
YDR318W	MCM21	305.678	300 - 310	339.61	315 - 363	1.11443	0.955415	0.355215	0.443411	not	548.759	405 - 723	1.79428	1.09095	0.284191	0.37626	not	640.23	467 - 869	2.08732	1.12212	0.214297	0.371343	not	reliable
YJL082W	IML2	305.734	299 - 311	516.157	500 - 533	1.69423	1.45248	0.000268789	0.00660363	not	677.318	655 - 705	2.22389	1.35217	0.00112801	0.00898411	not	617.266	607 - 629	2.02747	1.08995	0.121167	0.2571	not	reliable
YJL066C	MPM1	305.745	295 - 314	323.397	302 - 346	1.06253	0.91092	0.0955298	0.156064	not	493.482	491 - 496	1.62119	0.985713	0.775478	0.824878	not	595.651	584 - 610	1.95713	1.05214	0.319901	0.478161	not	reliable
YOL008W	COQ10	306.412	278 - 341	353.037	329 - 378	1.15344	0.988857	0.822635	0.862432	not	518.376	480 - 556	1.69364	1.02976	0.579546	0.658877	not	638.838	625 - 654	2.08728	1.1221	0.0541049	0.158694	not	reliable
YBL010C	YBL010C	306.703	275 - 336	337.81	313 - 364	1.10742	0.949399	0.387816	0.476327	not	449.988	374 - 542	1.47619	0.897551	0.147809	0.221811	not	679.611	NA	2.23045	1.19907	0.0218789	0.0967531	not	reliable
YKR049C	FMP46	306.759	266 - 349	334.631	322 - 348	1.10062	0.94357	0.350765	0.439596	not	477.788	412 - 545	1.56754	0.953093	0.520548	0.604299	not	514.764	432 - 608	1.68969	0.908362	0.217911	0.375763	not	reliable
YKL139W	CTK1	307.003	303 - 309	383.778	372 - 396	1.25479	1.07575	0.157618	0.230896	not	586.599	492 - 711	1.91608	1.16501	0.0418596	0.0829565	not	626.572	548 - 711	2.04601	1.09991	0.143791	0.286973	not	reliable
YAL011W	SWC3	307.171	270 - 345	385.455	365 - 406	1.2643	1.0839	0.204895	0.28523	not	482.474	480 - 485	1.58388	0.963024	0.537851	0.620074	not	483.974	460 - 506	1.58883	0.854141	0.034261	0.122019	not	reliable
YBL063W	KIP1	307.314	285 - 330	405.977	360 - 455	1.32326	1.13445	0.0490268	0.0935605	not	579.122	468 - 719	1.88463	1.14588	0.0739159	0.128914	not	488.891	447 - 537	1.59265	0.856193	0.0223063	0.0978779	not	reliable
YDL006W	PTC1	307.841	222 - 406	306.602	298 - 313	1.01334	0.868751	0.148624	0.220867	not	410.239	354 - 468	1.35659	0.824832	0.074493	0.129681	not	542.647	483 - 604	1.79384	0.964349	0.691579	0.800403	not	reliable
YDR069C	DOA4	308.239	300 - 314	345.065	344 - 345	1.12197	0.961876	0.408922	0.497176	not	515.031	454 - 582	1.67511	1.0185	0.730901	0.789379	not	590.748	559 - 619	1.92149	1.03297	0.518731	0.660486	not	reliable
YOR149C	SMP3	308.561	276 - 342	336.091	333 - 340	1.09001	0.934476	0.194854	0.274017	not	437.474	398 - 482	1.41934	0.862983	0.0294549	0.0638058	not	453.744	426 - 477	1.47199	0.791325	0.0034461	0.0488328	not	reliable
YBL046W	PSY4	308.861	257 - 375	273.778	192 - 380	0.874954	0.750107	0.0292464	0.0638186	not	396.182	308 - 503	1.27484	0.775127	0.0255046	0.0576556	not	621.634	547 - 703	2.01027	1.0807	0.278031	0.436073	not	reliable
YER046W	SPO73	309.041	288 - 330	327.918	313 - 343	1.06288	0.911216	0.0846226	0.141396	not	478.091	466 - 489	1.54919	0.941936	0.265832	0.356968	not	640.693	630 - 651	2.07707	1.11661	0.0543202	0.158817	not	reliable
YJL046W	AIM22	309.063	293 - 323	291.421	237 - 357	0.944117	0.809402	0.0159068	0.0413514	not	402.441	385 - 421	1.30415	0.792944	0.00396285	0.0168637	not	526.642	428 - 634	1.70335	0.915704	0.21484	0.371941	not	reliable
YMR299C	DYN3	309.775	265 - 364	373.372	318 - 434	1.20108	1.02969	0.658429	0.725464	not	642.102	582 - 707	2.07063	1.25898	0.00957841	0.0293316	not	703.014	692 - 716	2.27038	1.22053	0.00992505	0.0700825	not	reliable
YER103W	SSA4	310.044	298 - 321	863.315	719 - 1030	2.78674	2.3891	1.17405e-05	0.00626999	induced	1080.54	1010 - 1150	3.50134	2.12887	1.029e-05	0.0060363	induced	681.434	648 - 714	2.20789	1.18694	0.0136465	0.0790803	not	reliable
YLR207W	HRD3	310.089	290 - 328	503.405	486 - 519	1.63173	1.3989	0.000652129	0.00834489	not	661.475	604 - 736	2.14258	1.30272	0.00435297	0.0178279	not	703.014	689 - 716	2.28038	1.22591	0.00732611	0.0623021	not	reliable
YIL176C	PAU14	310.156	278 - 345	370.094	333 - 411	1.19958	1.02841	0.654478	0.722148	not	653.694	560 - 776	2.1178	1.28766	0.0118387	0.0339944	not	651.977	450 - 930	2.10072	1.12933	0.252927	0.41159	not	reliable
YIR023W	DAL81	310.268	256 - 375	515.657	476 - 556	1.67902	1.43944	0.00206176	0.0125932	not	737.764	626 - 856	2.40378	1.46154	0.00257569	0.0132317	not	628.421	553 - 714	2.04655	1.1002	0.238932	0.397704	not	reliable
YKL168C	KKQ8	310.711	280 - 344	359.589	248 - 545	1.15231	0.987888	0.900149	0.922494	not	535.44	495 - 579	1.72534	1.04903	0.376795	0.470349	not	527.739	470 - 597	1.69873	0.913221	0.148586	0.293641	not	reliable
YBR161W	CSH1	310.756	290 - 332	399.555	347 - 467	1.2878	1.10405	0.1204	0.186315	not	462.5	448 - 475	1.49097	0.906537	0.0843412	0.142654	not	589.474	NA	1.90038	1.02163	0.65693	0.773921	not	reliable
YGR140W	CBF2	310.758	238 - 397	401.198	339 - 475	1.30866	1.12193	0.210774	0.29169	not	641.904	598 - 687	2.09512	1.27387	0.0184761	0.0456733	not	572.877	510 - 635	1.86835	1.00441	0.955895	0.975734	not	reliable
YOR274W	MOD5	311.504	267 - 357	313.65	248 - 388	1.01012	0.865986	0.122287	0.188411	not	474.531	363 - 617	1.53306	0.932127	0.429824	0.520686	not	511.737	493 - 532	1.6588	0.891757	0.10844	0.239755	not	reliable
YDR359C	EAF1	311.759	300 - 320	329.819	323 - 337	1.06257	0.910949	0.0901497	0.148959	not	471.936	412 - 531	1.52033	0.924389	0.192542	0.27591	not	615.441	574 - 653	1.98222	1.06562	0.26549	0.423166	not	reliable
YKR063C	LAS1	311.792	293 - 328	338.335	321 - 354	1.08967	0.934187	0.220991	0.303012	not	455.223	415 - 501	1.46798	0.892557	0.0737472	0.128739	not	503.081	460 - 546	1.62161	0.871763	0.0403285	0.133311	not	reliable
YLL064C	PAU18	311.804	291 - 331	410.585	310 - 530	1.31391	1.12643	0.174898	0.251328	not	714.575	697 - 730	2.30512	1.40155	0.000741358	0.00771295	not	820.322	704 - 961	2.64114	1.41985	0.00163532	0.0360325	not	reliable
YPL181W	CTI6	311.991	280 - 345	437.22	423 - 450	1.40182	1.20179	0.0091226	0.0286812	not	629.237	543 - 721	2.01382	1.22444	0.0186908	0.0460633	not	760.999	750 - 770	2.44198	1.31278	0.00153248	0.0356419	not	reliable
YDL159W	STE7	312.103	304 - 318	345.048	329 - 361	1.10728	0.94928	0.300882	0.387563	not	465.058	420 - 513	1.49187	0.907081	0.127098	0.197112	not	500.019	490 - 511	1.60663	0.863707	0.0192663	0.0908844	not	reliable
YAL034C	FUN19	312.339	271 - 350	408.672	408 - 409	1.31969	1.13139	0.075575	0.129537	not	535.874	505 - 563	1.73118	1.05259	0.420962	0.511924	not	628.32	578 - 680	2.02933	1.09095	0.191442	0.34473	not	reliable
YOR336W	KRE5	312.605	304 - 320	486.249	457 - 514	1.5623	1.33938	0.00107165	0.00991221	not	660.404	604 - 726	2.11909	1.28844	0.00399557	0.0169407	not	513.589	496 - 533	1.65004	0.887043	0.0454498	0.143291	not	reliable
YGL064C	MRH4	312.739	277 - 347	307.351	281 - 336	0.99072	0.849355	0.0287298	0.0629097	not	455.709	384 - 545	1.46757	0.89231	0.131729	0.203069	not	530.266	524 - 537	1.70928	0.918889	0.177466	0.327807	not	reliable
YDR107C	TMN2	313.384	303 - 322	425.378	409 - 442	1.35973	1.16571	0.0157821	0.0411353	not	623.2	620 - 627	1.99371	1.21221	0.00718459	0.0244702	not	484.536	396 - 593	1.5467	0.831491	0.023976	0.101033	not	reliable
YDR219C	MFB1	313.496	297 - 326	352.903	310 - 404	1.13141	0.969967	0.592253	0.669421	not	531.695	392 - 702	1.69873	1.03286	0.682952	0.750845	not	446.317	NA	1.42964	0.768558	0.00337354	0.0484283	not	reliable
YNL314W	DAL82	313.519	293 - 330	394.484	323 - 475	1.26468	1.08422	0.241856	0.325777	not	490.806	443 - 537	1.57437	0.957242	0.438211	0.528357	not	619.161	555 - 696	1.98403	1.0666	0.305351	0.464639	not	reliable
YNL159C	ASI2	313.563	286 - 342	325.248	285 - 372	1.04445	0.89542	0.105524	0.168087	not	403.813	378 - 435	1.29556	0.787723	0.00696382	0.0240021	not	595.662	596 - 596	1.91299	1.02841	0.612172	0.736848	not	reliable
YHR209W	CRG1	314.029	265 - 369	213.981	156 - 286	0.674078	0.577894	0.00125679	0.0104242	repressed	529.613	386 - 717	1.67172	1.01643	0.867461	0.894839	not	1365.34	1070 - 1690	4.33646	2.33124	3.01158e-05	0.008215	induced	not
YDL203C	ACK1	314.611	249 - 387	419.187	359 - 489	1.3502	1.15754	0.112418	0.176473	not	555.044	508 - 603	1.78631	1.08611	0.317624	0.410407	not	569.674	481 - 674	1.83265	0.985215	0.854526	0.913648	not	reliable
YGR091W	PRP31	314.774	246 - 405	362.619	334 - 398	1.15201	0.987632	0.858302	0.889442	not	475.246	445 - 511	1.50817	0.916992	0.263982	0.355157	not	551.918	469 - 643	1.75079	0.941207	0.44114	0.593362	not	reliable
YGR150C	CCM1	314.953	279 - 355	384.745	362 - 409	1.22249	1.04806	0.390872	0.479352	not	561.886	496 - 634	1.78192	1.08344	0.231195	0.318781	not	497.538	466 - 533	1.58044	0.84963	0.0208616	0.0943946	not	reliable
YBR237W	PRP5	314.987	284 - 350	459.788	453 - 466	1.4602	1.25185	0.00379455	0.0171148	not	610.386	596 - 628	1.93986	1.17947	0.0168297	0.0428472	not	622.886	511 - 752	1.97543	1.06197	0.373629	0.529635	not	reliable
YOL116W	MSN1	314.998	285 - 345	324.332	320 - 328	1.0304	0.883373	0.0384707	0.0779893	not	480.636	412 - 559	1.52692	0.928391	0.226314	0.313426	not	534.551	500 - 570	1.69857	0.913133	0.116626	0.250431	not	reliable
YIR016W	YIR016W	315.265	256 - 385	416.17	410 - 421	1.31918	1.13095	0.0838495	0.140395	not	581.96	494 - 678	1.84037	1.11898	0.177085	0.257678	not	562.913	509 - 623	1.78444	0.959295	0.531659	0.670322	not	reliable
YDR289C	RTT103	315.276	257 - 375	318.946	266 - 385	1.00665	0.86301	0.0902071	0.149009	not	447.276	446 - 448	1.41843	0.862429	0.050509	0.0958655	not	650.51	576 - 722	2.06221	1.10862	0.14578	0.290021	not	reliable
YIL135C	VHS2	315.634	302 - 327	304.841	285 - 324	0.970549	0.832062	0.00919382	0.028793	not	400.735	384 - 416	1.27506	0.775258	0.00319039	0.0149874	not	613.549	604 - 623	1.95358	1.05023	0.343927	0.502955	not	reliable
YIL151C	YIL151C	315.923	299 - 334	446.06	440 - 453	1.41453	1.21269	0.00550048	0.0211207	not	667.193	481 - 886	2.10075	1.27729	0.0265638	0.0593619	not	647.446	601 - 695	2.05337	1.10387	0.080662	0.199923	not	reliable
YNL083W	SAL1	315.937	241 - 405	386.332	338 - 442	1.23764	1.06105	0.491985	0.576122	not	526.439	493 - 561	1.6917	1.02858	0.726628	0.785964	not	550.62	546 - 556	1.76946	0.951244	0.529854	0.668792	not	reliable
YLR386W	VAC14	316.102	296 - 335	498.584	491 - 505	1.58638	1.36002	0.000998656	0.00978889	not	637.186	619 - 655	2.02769	1.23287	0.00726794	0.0245858	not	786.91	782 - 793	2.5043	1.34628	0.00122521	0.033129	not	reliable
YLR103C	CDC45	316.237	270 - 372	390.098	336 - 451	1.24579	1.06803	0.367872	0.45657	not	568.863	534 - 607	1.81553	1.10387	0.180882	0.262186	not	605.501	565 - 648	1.93386	1.03962	0.550955	0.686994	not	reliable
YLR369W	SSQ1	316.268	280 - 353	437.128	424 - 450	1.38328	1.1859	0.012695	0.0353662	not	601.638	524 - 679	1.90348	1.15735	0.0391049	0.0785709	not	778.947	700 - 870	2.46341	1.3243	0.00248019	0.0423806	not	reliable
YOL145C	CTR9	316.326	253 - 398	336.31	253 - 435	1.06794	0.915561	0.390761	0.47932	not	614.6	586 - 642	1.96796	1.19656	0.0525352	0.098619	not	604.424	450 - 797	1.92662	1.03573	0.721057	0.821078	not	reliable
YNL193W	YNL193W	316.612	268 - 373	359.325	328 - 397	1.13525	0.973266	0.64497	0.714024	not	410.204	396 - 427	1.29532	0.787573	0.00650261	0.0229304	not	500.504	337 - 711	1.56713	0.842471	0.125673	0.263776	not	reliable
YOL025W	LAG2	316.993	287 - 344	387.831	375 - 401	1.23176	1.056	0.330485	0.419108	not	460.796	355 - 595	1.4589	0.887038	0.16949	0.248498	not	595.662	596 - 596	1.89204	1.01714	0.755028	0.845799	not	reliable
YKR086W	PRP16	317.616	296 - 340	408.615	393 - 423	1.28754	1.10382	0.075938	0.129878	not	658.532	656 - 661	2.07661	1.26261	0.00328726	0.0152901	not	595.673	579 - 609	1.87864	1.00994	0.83938	0.903776	not	reliable
YGR230W	BNS1	317.974	267 - 372	323.281	311 - 337	1.02645	0.879991	0.0937799	0.153656	not	608.879	581 - 632	1.93454	1.17623	0.0504936	0.0958655	not	756.061	745 - 764	2.40355	1.29213	0.00727618	0.0623021	not	reliable
YDR520C	URC2	318.064	247 - 399	423.041	396 - 451	1.34915	1.15664	0.0979232	0.159108	not	596.802	562 - 634	1.90332	1.15725	0.099061	0.161933	not	513.019	469 - 558	1.63547	0.879213	0.137464	0.278631	not	reliable
YBR097W	VPS15	318.507	305 - 332	442.571	352 - 539	1.39139	1.19286	0.0313941	0.0667037	not	645.985	646 - 646	2.03245	1.23576	0.00475936	0.0189303	not	643.763	618 - 669	2.02582	1.08906	0.11045	0.242228	not	reliable
YHR080C	YHR080C	318.708	289 - 347	449.521	437 - 461	1.41976	1.21717	0.00956146	0.0294873	not	656.186	529 - 792	2.06434	1.25515	0.0216364	0.051139	not	605.543	595 - 615	1.91279	1.0283	0.614455	0.738495	not	reliable
YNR008W	LRO1	319.263	286 - 358	447.983	334 - 592	1.3999	1.20015	0.0691372	0.121328	not	553.273	514 - 601	1.7345	1.05461	0.342874	0.436779	not	529.631	513 - 545	1.6604	0.892616	0.0609724	0.168553	not	reliable
YJR111C	YJR111C	320.087	277 - 363	297.427	267 - 331	0.929786	0.797116	0.00623771	0.0227296	not	423.99	384 - 467	1.32529	0.805797	0.00820575	0.0264907	not	678.396	NA	2.11797	1.1386	0.0744182	0.189977	not	reliable
YLR119W	SRN2	320.866	267 - 383	364.414	328 - 410	1.13304	0.971369	0.652947	0.721021	not	540.289	486 - 602	1.6813	1.02226	0.744341	0.799771	not	872.084	814 - 933	2.71726	1.46077	0.000854716	0.0298386	not	reliable
YFR013W	IOC3	320.978	287 - 361	503.97	438 - 585	1.57121	1.34702	0.0023493	0.0134505	not	651.136	610 - 696	2.02844	1.23333	0.00941084	0.029048	not	536.432	533 - 540	1.67282	0.899292	0.0738162	0.189428	not	reliable
YMR234W	RNH1	320.99	289 - 354	348.192	338 - 359	1.08476	0.929977	0.183274	0.261136	not	517.439	485 - 553	1.6137	0.981159	0.717549	0.778526	not	684.592	565 - 823	2.12998	1.14506	0.0802524	0.19917	not	reliable
YNL225C	CNM67	321.102	308 - 332	364.696	360 - 369	1.13834	0.975914	0.595453	0.67183	not	600.732	568 - 634	1.87455	1.13976	0.0394325	0.0792006	not	601.223	592 - 611	1.8772	1.00916	0.848778	0.909711	not	reliable
YCR019W	MAK32	321.135	315 - 325	358.006	302 - 426	1.11782	0.958323	0.488998	0.57298	not	438.208	403 - 470	1.3675	0.831464	0.0131267	0.0364842	not	575.824	465 - 701	1.79446	0.964684	0.578506	0.709768	not	reliable
YOL048C	RRT8	321.314	283 - 356	334.839	314 - 358	1.05008	0.900246	0.103197	0.165292	not	451.189	407 - 495	1.41263	0.858905	0.0531128	0.0995381	not	595.555	484 - 748	1.86229	1.00115	0.987454	0.992367	not	reliable
YML102W	CAC2	321.379	283 - 362	453.498	403 - 510	1.41194	1.21048	0.0148286	0.039487	not	656.759	629 - 685	2.04494	1.24336	0.00647701	0.0228676	not	656.784	603 - 719	2.0435	1.09856	0.144494	0.28807	not	reliable
YDR243C	PRP28	321.382	273 - 373	383.495	354 - 413	1.20309	1.03142	0.634014	0.705347	not	525.266	470 - 583	1.64799	1.00201	0.977042	0.982602	not	506.799	484 - 531	1.59226	0.855985	0.0444544	0.141255	not	reliable
YKL159C	RCN1	321.645	252 - 408	317.392	263 - 374	0.986433	0.84568	0.0604413	0.109464	not	452.628	428 - 479	1.40583	0.854766	0.0642518	0.115075	not	667.187	628 - 716	2.07388	1.1149	0.146694	0.290919	not	reliable
YDR179W-A	YDR179W-A	321.802	280 - 369	322.196	309 - 335	1.00165	0.858727	0.0242416	0.0557587	not	432.923	414 - 454	1.34614	0.818478	0.00959991	0.0293656	not	554.865	465 - 655	1.72219	0.925832	0.258284	0.417255	not	reliable
[truncated: 5,293 more rows]

## Sheet: Repressed in 4N
ORF	Gene names	1N MED	1N CON	2N MED	2N CON	2N/1N	2N/1N norm	2N/1N P	2N/1N Padj	2N/1N signif	3N MED	3N CON	3N/1N	3N/1N norm	3N/1N P	3N/1N Padj	3N/1N signif	4N MED	4N CON	4N/1N	4N/1N norm	4N/1N P	4N/1N Padj	4N/1N signif	Reliable
[truncated: 65 more rows]

[truncated: 2 more sheets: Induced in 4N, Normalized]
